# Supplementary material for: Controlled, one-pot synthesis of recyclable poly(1,3-diene)-polyester block copolymers, catalyzed by yttrium β-diketiminate complexes
Source: Royal Society of Chemistry journal article supplement (doi:10.1039/d2sc02265f), 2022-01-01
Supplement: d2sc02265f1.pdf [file d2sc02265f1.pdf]

## Electronic Supporting Information

### For

Controlled, One-pot Synthesis of Recyclable Poly(1,3-diene)-Polyester Block Copolymers, Catalyzed by Yttrium  $\beta$ -Diketiminate Complexes

Sophia C. Kosloski-Oh,<sup>a</sup> Yvonne Manjarrez,<sup>a</sup> Taleen J. Boghossian<sup>a</sup> and Megan E. Fieser<sup>\*a,b</sup>

<sup>a</sup>Department of Chemistry, University of Southern California, Los Angeles, California 90089

<sup>b</sup>Wrigley Institute for Environmental Studies, University of Southern California, Los Angeles, California 90089

Email: [Fieser@usc.edu](mailto:Fieser@usc.edu)

\*To whom correspondence should be addressed.

## Table of Contents

|            |                                                                                                                                                                                                                                    |            |
|------------|------------------------------------------------------------------------------------------------------------------------------------------------------------------------------------------------------------------------------------|------------|
| <b>1.0</b> | <b>General Considerations</b>                                                                                                                                                                                                      | <b>S17</b> |
| <b>1.1</b> | <b>Polymerization and Methods</b>                                                                                                                                                                                                  | <b>S17</b> |
|            | <i>General procedure for the homopolymerization of 1,3-dienes or cyclic esters</i>                                                                                                                                                 | <b>S17</b> |
|            | <i>General procedure for the block copolymerization of 1,3-dienes and cyclic esters</i>                                                                                                                                            | <b>S17</b> |
| <b>1.2</b> | <b>Characterization Methods</b>                                                                                                                                                                                                    | <b>S18</b> |
| <b>1.3</b> | <b>Impurity in [Ph<sub>3</sub>C][B(C<sub>6</sub>F<sub>5</sub>)<sub>4</sub>]</b>                                                                                                                                                    | <b>S19</b> |
|            | <b>Fig. S1</b> <sup>19</sup> F NMR of [Ph <sub>3</sub> C][B(C <sub>6</sub> F <sub>5</sub> ) <sub>4</sub> ] in C <sub>6</sub> D <sub>6</sub> at 298 K.                                                                              | <b>S19</b> |
| <b>1.4</b> | <b>Homopolymerization of 1,3-dienes and cyclic esters with 8/[Ph<sub>3</sub>C][B(C<sub>6</sub>F<sub>5</sub>)<sub>4</sub>].</b>                                                                                                     | <b>S20</b> |
|            | <b>Table S1</b> Homopolymerization of a range of 1,3-dienes and cyclic esters with precatalyst <b>8</b> .                                                                                                                          | <b>S20</b> |
| <b>1.5</b> | <b>Homopolymerization of different feed ratios of IP and CL with 6/[Ph<sub>3</sub>C][B(C<sub>6</sub>F<sub>5</sub>)<sub>4</sub>].</b>                                                                                               | <b>S21</b> |
|            | <b>Table S2</b> Homopolymerization of IP or CL with precatalyst <b>6</b> .                                                                                                                                                         | <b>S21</b> |
| <b>1.6</b> | <b>Recycling PIP-<i>b</i>-PCL Copolymers</b>                                                                                                                                                                                       | <b>S22</b> |
|            | <i>General procedure for the degradation of PIP-<i>b</i>-PCL diblocks</i>                                                                                                                                                          | <b>S22</b> |
|            | <i>Formation of Alkoxide macroinitiator with recovered IP 50 and Y[N(SiMe<sub>3</sub>)<sub>2</sub>]<sub>3</sub> and repolymerization with CL.</i>                                                                                  | <b>S22</b> |
|            | <b>Fig. S2</b> <sup>1</sup> H NMR stack of Y[N(SiMe <sub>3</sub> ) <sub>2</sub> ] <sub>3</sub> before (bottom) and after recovered IP 50 addition (top) in toluene- <i>d</i> <sub>8</sub> at 298 K.                                | <b>S22</b> |
|            | <b>Fig. S3</b> <sup>1</sup> H NMR stack of PIP- <i>b</i> -PCL repolymerization with Y[N(SiMe <sub>3</sub> ) <sub>2</sub> ] <sub>3</sub> and PIP 50 in toluene- <i>d</i> <sub>8</sub> at 298 K.                                     | <b>S23</b> |
|            | <i>General procedure for the repolymerization of PIP-<i>b</i>-PCL diblocks</i>                                                                                                                                                     | <b>S23</b> |
|            | <b>Table S3.</b> Polymerization, depolymerization, and repolymerization of PIP- <i>b</i> -PCL.                                                                                                                                     | <b>S24</b> |
| <b>2.0</b> | <b>References</b>                                                                                                                                                                                                                  | <b>S25</b> |
| <b>3.0</b> | <b>Nuclear Magnetic Resonance (NMR) Spectroscopy Characterization of Isolated Polymers</b>                                                                                                                                         | <b>S26</b> |
| <b>3.1</b> | <b><sup>1</sup>H NMR Spectroscopy</b>                                                                                                                                                                                              | <b>S26</b> |
|            | <b>Fig. S4</b> <sup>1</sup> H NMR spectrum of PIP 800 equivalents generated by 6/[Ph <sub>3</sub> C][B(C <sub>6</sub> F <sub>5</sub> ) <sub>4</sub> ] from <b>Table 1</b> , entry 1a in CDCl <sub>3</sub> at 298 K (12 h).         | <b>S26</b> |
|            | <b>Fig. S5</b> <sup>1</sup> H NMR spectrum of PIP 800 equivalents generated by 6/[Ph <sub>3</sub> C][B(C <sub>6</sub> F <sub>5</sub> ) <sub>4</sub> ] from <b>Table 1</b> , entry 1(b and c) in CDCl <sub>3</sub> at 298 K (12 h). | <b>S26</b> |
|            | <b>Fig. S6</b> <sup>1</sup> H NMR spectrum of PIP 800 equivalents generated by 8/[Ph <sub>3</sub> C][B(C <sub>6</sub> F <sub>5</sub> ) <sub>4</sub> ] from <b>Table 1</b> , entry 3 in CDCl <sub>3</sub> at 298 K (12 h).          | <b>S27</b> |

|                                                                                                                                                                                                                                                                    |            |
|--------------------------------------------------------------------------------------------------------------------------------------------------------------------------------------------------------------------------------------------------------------------|------------|
| <b>Fig. S7</b> $^1\text{H}$ NMR spectrum of PIP 800 equivalents generated by <b>6</b> /[Ph <sub>3</sub> C][B(C <sub>6</sub> F <sub>5</sub> ) <sub>4</sub> ] from <b>Table 1</b> , entry 4 in CDCl <sub>3</sub> at 298 K (24 h).                                    | <b>S28</b> |
| <b>Fig. S8</b> $^1\text{H}$ NMR spectrum of PIP 800 equivalents generated by <b>6</b> /[Ph <sub>3</sub> C][B(C <sub>6</sub> F <sub>5</sub> ) <sub>4</sub> ] from <b>Table 1</b> , entry 5 in CDCl <sub>3</sub> at 298 K (30 min).                                  | <b>S29</b> |
| <b>Fig. S9</b> $^1\text{H}$ NMR spectrum of PIP 800 equivalents generated by <b>8</b> /[Ph <sub>3</sub> C][B(C <sub>6</sub> F <sub>5</sub> ) <sub>4</sub> ] from <b>Table 1</b> , entry 6 in CDCl <sub>3</sub> at 298 K (30 min).                                  | <b>S29</b> |
| <b>Fig. S10</b> $^1\text{H}$ NMR spectrum of PCL 300 equivalents generated by <b>6</b> /[Ph <sub>3</sub> C][B(C <sub>6</sub> F <sub>5</sub> ) <sub>4</sub> ] from <b>Table 1</b> , entry 7 in CDCl <sub>3</sub> at 298 K (10 min).                                 | <b>S30</b> |
| <b>Fig. S11</b> $^1\text{H}$ NMR spectrum of PCL 300 equivalents generated by <b>8</b> /[Ph <sub>3</sub> C][B(C <sub>6</sub> F <sub>5</sub> ) <sub>4</sub> ] from <b>Table 1</b> , entry 8 in CDCl <sub>3</sub> at 298 K (10 min).                                 | <b>S30</b> |
| <b>Fig. S12</b> $^1\text{H}$ NMR spectrum of PCL 300 equivalents generated by <b>6</b> /[Ph <sub>3</sub> C][B(C <sub>6</sub> F <sub>5</sub> ) <sub>4</sub> ] from <b>Table 1</b> , entry 9 in CDCl <sub>3</sub> at 298 K (2 h).                                    | <b>S31</b> |
| <b>Fig. S13</b> $^1\text{H}$ NMR spectrum of PIP- <i>b</i> -PCL 550:550 generated by <b>6</b> /[Ph <sub>3</sub> C][B(C <sub>6</sub> F <sub>5</sub> ) <sub>4</sub> ] from <b>Table 2</b> , entry 2 in CDCl <sub>3</sub> at 298 K.                                   | <b>S32</b> |
| <b>Fig. S14</b> $^1\text{H}$ NMR spectrum of PIP- <i>b</i> -PCL 550:550 equivalents generated by <b>6</b> /[Ph <sub>3</sub> C][B(C <sub>6</sub> F <sub>5</sub> ) <sub>4</sub> ] from <b>Table 2</b> , entry 2 in CDCl <sub>3</sub> at 298 K.                       | <b>S33</b> |
| <b>Fig. S15</b> $^1\text{H}$ NMR spectrum of PIP- <i>b</i> -PCL 300:800 equivalents generated by <b>6</b> /[Ph <sub>3</sub> C][B(C <sub>6</sub> F <sub>5</sub> ) <sub>4</sub> ] from <b>Table 2</b> , entry 3 in CDCl <sub>3</sub> at 298 K.                       | <b>S34</b> |
| <b>Fig. S16</b> $^1\text{H}$ NMR spectrum of PIP 800 equivalents generated by <b>6</b> /[Ph <sub>3</sub> C][B(C <sub>6</sub> F <sub>5</sub> ) <sub>4</sub> ] from <b>Table 3</b> , entry 1 in CDCl <sub>3</sub> at 298 K (IP addition time 0 min).                 | <b>S35</b> |
| <b>Fig. S17</b> $^1\text{H}$ NMR spectrum of PIP 800 equivalents generated by <b>6</b> /[Ph <sub>3</sub> C][B(C <sub>6</sub> F <sub>5</sub> ) <sub>4</sub> ] from <b>Table 3</b> , entry 2 in CDCl <sub>3</sub> at 298 K (IP addition time 30 min).                | <b>S36</b> |
| <b>Fig. S18</b> $^1\text{H}$ NMR spectrum of PIP- <i>b</i> -PCL 800:300 equivalents generated by <b>6</b> and 0.5 equivalents of [Ph <sub>3</sub> C][B(C <sub>6</sub> F <sub>5</sub> ) <sub>4</sub> ] from <b>Table 3</b> , entry 3 in CDCl <sub>3</sub> at 298 K. | <b>S37</b> |
| <b>Fig. S19</b> $^1\text{H}$ NMR spectrum of PIP- <i>b</i> -PCL 800:300 equivalents generated by <b>6</b> and 1.5 equivalents of [Ph <sub>3</sub> C][B(C <sub>6</sub> F <sub>5</sub> ) <sub>4</sub> ] from <b>Table 3</b> , entry 4 in CDCl <sub>3</sub> at 298 K. | <b>S38</b> |
| <b>Fig. S20</b> $^1\text{H}$ NMR spectrum of PMyr 800 equivalents generated by <b>6</b> /[Ph <sub>3</sub> C][B(C <sub>6</sub> F <sub>5</sub> ) <sub>4</sub> ] from <b>Table 4</b> , entry 1 in CDCl <sub>3</sub> at 298 K (30 min).                                | <b>S39</b> |
| <b>Fig. S21</b> $^1\text{H}$ NMR spectrum of PMyr 800 equivalents generated by <b>6</b> /[Ph <sub>3</sub> C][B(C <sub>6</sub> F <sub>5</sub> ) <sub>4</sub> ] from <b>Table 4</b> , entry 2 in CDCl <sub>3</sub> at 298 K (90 min).                                | <b>S39</b> |
| <b>Fig. S22</b> $^1\text{H}$ NMR spectrum of PMyr 800 equivalents generated by <b>6</b> /[Ph <sub>3</sub> C][B(C <sub>6</sub> F <sub>5</sub> ) <sub>4</sub> ] from <b>Table 4</b> , entry 3 in CDCl <sub>3</sub> at 298 K (3 h).                                   | <b>S40</b> |
| <b>Fig. S23</b> $^1\text{H}$ NMR spectrum of PS 800 equivalents generated by <b>6</b> /[Ph <sub>3</sub> C][B(C <sub>6</sub> F <sub>5</sub> ) <sub>4</sub> ] from <b>Table 4</b> , entry 4 in CDCl <sub>3</sub> at 298 K (30 min).                                  | <b>S40</b> |
| <b>Fig. S24</b> $^1\text{H}$ NMR spectrum of PS 800 equivalents generated by <b>6</b> /[Ph <sub>3</sub> C][B(C <sub>6</sub> F <sub>5</sub> ) <sub>4</sub> ] from <b>Table 4</b> , entry 5 in CDCl <sub>3</sub> at 298 K (20 h).                                    | <b>S41</b> |
| <b>Fig. S25</b> $^1\text{H}$ NMR spectrum of PVL 300 equivalents generated by <b>6</b> /[Ph <sub>3</sub> C][B(C <sub>6</sub> F <sub>5</sub> ) <sub>4</sub> ] from <b>Table 4</b> , entry 6 in CDCl <sub>3</sub> at 298 K (10 min).                                 | <b>S41</b> |
| <b>Fig. S26</b> $^1\text{H}$ NMR spectrum of PDL 300 equivalents generated by <b>6</b> /[Ph <sub>3</sub> C][B(C <sub>6</sub> F <sub>5</sub> ) <sub>4</sub> ] from <b>Table 4</b> , entry 7 in CDCl <sub>3</sub> at 298 K (6 h).                                    | <b>S42</b> |
| <b>Fig. S27</b> $^1\text{H}$ NMR spectrum of PIP- <i>b</i> -PVL 800:300 equivalents generated by <b>6</b> /[Ph <sub>3</sub> C][B(C <sub>6</sub> F <sub>5</sub> ) <sub>4</sub> ] from <b>Table 5</b> , entry 1 in CDCl <sub>3</sub> at 298 K.                       | <b>S42</b> |
| <b>Fig. S28</b> $^1\text{H}$ NMR spectrum of PIP- <i>b</i> -PDL 800:300 equivalents generated by <b>6</b> /[Ph <sub>3</sub> C][B(C <sub>6</sub> F <sub>5</sub> ) <sub>4</sub> ] from <b>Table 5</b> , entry 2 in CDCl <sub>3</sub> at 298 K.                       | <b>S43</b> |
| <b>Fig. S29</b> $^1\text{H}$ NMR spectrum of PMyr- <i>b</i> -PCL 800:300 equivalents generated by <b>6</b> /[Ph <sub>3</sub> C][B(C <sub>6</sub> F <sub>5</sub> ) <sub>4</sub> ] from <b>Table 5</b> , entry 3 in CDCl <sub>3</sub> at 298 K.                      | <b>S43</b> |

|                 |                                                                                                                                                                                                                                                 |            |
|-----------------|-------------------------------------------------------------------------------------------------------------------------------------------------------------------------------------------------------------------------------------------------|------------|
| <b>Fig. S30</b> | <sup>1</sup> H NMR spectrum of PMyr- <i>b</i> -PVL 800:300 equivalents generated by <b>6</b> /[Ph <sub>3</sub> C][B(C <sub>6</sub> F <sub>5</sub> ) <sub>4</sub> ] from <b>Table 5</b> , entry 4 in CDCl <sub>3</sub> at 298 K.                 | <b>S44</b> |
| <b>Fig. S31</b> | <sup>1</sup> H NMR spectrum of PMyr- <i>b</i> -PDL 800:300 equivalents generated by <b>6</b> /[Ph <sub>3</sub> C][B(C <sub>6</sub> F <sub>5</sub> ) <sub>4</sub> ] from <b>Table 5</b> , entry 5 in CDCl <sub>3</sub> at 298 K.                 | <b>S44</b> |
| <b>Fig. S32</b> | <sup>1</sup> H NMR spectrum of PMyr 800 equivalents generated by <b>8</b> /[Ph <sub>3</sub> C][B(C <sub>6</sub> F <sub>5</sub> ) <sub>4</sub> ] from <b>Table S1</b> , entry 1 in CDCl <sub>3</sub> at 298 K (30 min).                          | <b>S45</b> |
| <b>Fig. S33</b> | <sup>1</sup> H NMR spectrum of PS 800 equivalents generated by <b>8</b> /[Ph <sub>3</sub> C][B(C <sub>6</sub> F <sub>5</sub> ) <sub>4</sub> ] from <b>Table S1</b> , entry 2 in CDCl <sub>3</sub> at 298 K (30 min).                            | <b>S45</b> |
| <b>Fig. S34</b> | <sup>1</sup> H NMR spectrum of PVL 300 equivalents generated by <b>8</b> /[Ph <sub>3</sub> C][B(C <sub>6</sub> F <sub>5</sub> ) <sub>4</sub> ] from <b>Table S1</b> , entry 3 in CDCl <sub>3</sub> at 298 K (10 min).                           | <b>S46</b> |
| <b>Fig. S35</b> | <sup>1</sup> H NMR spectrum of PDL 300 equivalents generated by <b>8</b> /[Ph <sub>3</sub> C][B(C <sub>6</sub> F <sub>5</sub> ) <sub>4</sub> ] from <b>Table S1</b> , entry 4 in CDCl <sub>3</sub> at 298 K (6 h).                              | <b>S46</b> |
| <b>Fig. S36</b> | <sup>1</sup> H NMR spectrum of PIP 300 equivalents generated by <b>6</b> /[Ph <sub>3</sub> C][B(C <sub>6</sub> F <sub>5</sub> ) <sub>4</sub> ] from <b>Table S2</b> , entry 1 in CDCl <sub>3</sub> at 298 K (12 h).                             | <b>S47</b> |
| <b>Fig. S37</b> | <sup>1</sup> H NMR spectrum of PIP 550 equivalents generated by <b>6</b> /[Ph <sub>3</sub> C][B(C <sub>6</sub> F <sub>5</sub> ) <sub>4</sub> ] from <b>Table S2</b> , entry 2 in CDCl <sub>3</sub> at 298 K (12 h).                             | <b>S48</b> |
| <b>Fig. S38</b> | <sup>1</sup> H NMR spectrum of PCL 550 equivalents generated by <b>6</b> /[Ph <sub>3</sub> C][B(C <sub>6</sub> F <sub>5</sub> ) <sub>4</sub> ] from <b>Table S2</b> , entry 3 in CDCl <sub>3</sub> at 298 K (2 h).                              | <b>S49</b> |
| <b>Fig. S39</b> | <sup>1</sup> H NMR spectrum of PCL 800 equivalents generated by <b>6</b> /[Ph <sub>3</sub> C][B(C <sub>6</sub> F <sub>5</sub> ) <sub>4</sub> ] from <b>Table S2</b> , entry 4 in CDCl <sub>3</sub> at 298 K (2 h).                              | <b>S50</b> |
| <b>Fig. S40</b> | <sup>1</sup> H NMR spectrum of PCL 800 equivalents generated by <b>6</b> from <b>Table S2</b> , entry 5 in CDCl <sub>3</sub> at 298 K (No [Ph <sub>3</sub> C][B(C <sub>6</sub> F <sub>5</sub> ) <sub>4</sub> ] added) (10 min).                 | <b>S51</b> |
| <b>Fig. S41</b> | <sup>1</sup> H NMR spectrum of PIP 50 equivalents generated by <b>6</b> /[Ph <sub>3</sub> C][B(C <sub>6</sub> F <sub>5</sub> ) <sub>4</sub> ] from <b>Table S3</b> , entry 1 in CDCl <sub>3</sub> at 298 K (12 h).                              | <b>S51</b> |
| <b>Fig. S42</b> | <sup>1</sup> H NMR spectrum of PIP- <i>b</i> -PCL 50:50 equivalents generated by <b>6</b> /[Ph <sub>3</sub> C][B(C <sub>6</sub> F <sub>5</sub> ) <sub>4</sub> ] from <b>Table S3</b> , entry 2 in CDCl <sub>3</sub> at 298 K.                   | <b>S52</b> |
| <b>Fig. S43</b> | <sup>1</sup> H NMR spectrum of recovered PIP 50 equivalents after hydrolysis of PIP- <i>b</i> -PCL 50:50 equivalents from <b>Table S3</b> , entry 3 in CDCl <sub>3</sub> at 298 K (12 h).                                                       | <b>S52</b> |
| <b>Fig. S44</b> | <sup>1</sup> H NMR spectrum of repolymerized PIP- <i>b</i> -PCL 50:50 equivalents generated by <b>Y</b> [N(SiMe <sub>3</sub> ) <sub>2</sub> ] <sub>3</sub> from <b>Table S3</b> , entry 4 in CDCl <sub>3</sub> at 298 K.                        | <b>S53</b> |
| <b>Fig. S45</b> | <sup>1</sup> H NMR spectrum of PIP- <i>b</i> -PCL 50:50 equivalents generated by <b>6</b> /[Ph <sub>3</sub> C][B(C <sub>6</sub> F <sub>5</sub> ) <sub>4</sub> ] (1 mL of toluene) from <b>Table S3</b> , entry 5 in CDCl <sub>3</sub> at 298 K. | <b>S53</b> |
| <b>3.2</b>      | <b><sup>13</sup>C NMR Spectroscopy</b>                                                                                                                                                                                                          | <b>S54</b> |
| <b>Fig. S46</b> | <sup>13</sup> C NMR spectrum of PIP 800 equivalents generated by <b>6</b> /[Ph <sub>3</sub> C][B(C <sub>6</sub> F <sub>5</sub> ) <sub>4</sub> ] from <b>Table 1</b> , entry 1a in CDCl <sub>3</sub> at 298 K (12 h).                            | <b>S54</b> |
| <b>Fig. S47</b> | <sup>13</sup> C NMR spectrum of PIP equivalents generated by <b>6</b> /[Ph <sub>3</sub> C][B(C <sub>6</sub> F <sub>5</sub> ) <sub>4</sub> ] from <b>Table 1</b> , entry 1(b, c) in CDCl <sub>3</sub> at 298 K (12 h).                           | <b>S54</b> |
| <b>Fig. S48</b> | <sup>13</sup> C NMR spectrum of PIP 800 equivalents generated by <b>8</b> /[Ph <sub>3</sub> C][B(C <sub>6</sub> F <sub>5</sub> ) <sub>4</sub> ] from <b>Table 1</b> , entry 3 in CDCl <sub>3</sub> at 298 K (12 h).                             | <b>S55</b> |
| <b>Fig. S49</b> | <sup>13</sup> C NMR spectrum of PIP 800 equivalents generated by <b>6</b> /[Ph <sub>3</sub> C][B(C <sub>6</sub> F <sub>5</sub> ) <sub>4</sub> ] from <b>Table 1</b> , entry 4 in CDCl <sub>3</sub> at 298 K (24 h).                             | <b>S56</b> |
| <b>Fig. S50</b> | <sup>13</sup> C NMR spectrum of PIP 800 equivalents generated by <b>6</b> /[Ph <sub>3</sub> C][B(C <sub>6</sub> F <sub>5</sub> ) <sub>4</sub> ] from <b>Table 1</b> , entry 5 in CDCl <sub>3</sub> at 298 K (30 min).                           | <b>S57</b> |
| <b>Fig. S51</b> | <sup>13</sup> C NMR spectrum of PIP 800 equivalents generated by <b>8</b> /[Ph <sub>3</sub> C][B(C <sub>6</sub> F <sub>5</sub> ) <sub>4</sub> ] from <b>Table 1</b> , entry 6 in CDCl <sub>3</sub> at 298 K (30 min).                           | <b>S57</b> |



|                                                                                                                                                                                                                                                                       |            |
|-----------------------------------------------------------------------------------------------------------------------------------------------------------------------------------------------------------------------------------------------------------------------|------------|
| <b>Fig. S52</b> $^{13}\text{C}$ NMR spectrum of PCL 300 equivalents generated by <b>6</b> /[Ph <sub>3</sub> C][B(C <sub>6</sub> F <sub>5</sub> ) <sub>4</sub> ] from <b>Table 1</b> , entry 7 in CDCl <sub>3</sub> at 298 K (10 min).                                 | <b>S58</b> |
| <b>Fig. S53</b> $^{13}\text{C}$ NMR spectrum of PCL 300 equivalents generated by <b>8</b> /[Ph <sub>3</sub> C][B(C <sub>6</sub> F <sub>5</sub> ) <sub>4</sub> ] from <b>Table 1</b> , entry 8 in CDCl <sub>3</sub> at 298 K (10 min).                                 | <b>S58</b> |
| <b>Fig. S54</b> $^{13}\text{C}$ NMR spectrum of PCL 300 equivalents generated by <b>6</b> /[Ph <sub>3</sub> C][B(C <sub>6</sub> F <sub>5</sub> ) <sub>4</sub> ] from <b>Table 1</b> , entry 9 in CDCl <sub>3</sub> at 298 K (2 h).                                    | <b>S59</b> |
| <b>Fig. S55</b> $^{13}\text{C}$ NMR spectrum of PIP- <i>b</i> -PCL 800:300 equivalents generated by <b>6</b> /[Ph <sub>3</sub> C][B(C <sub>6</sub> F <sub>5</sub> ) <sub>4</sub> ] from <b>Table 2</b> , entry 1 in CDCl <sub>3</sub> at 298 K.                       | <b>S60</b> |
| <b>Fig. S56</b> $^{13}\text{C}$ NMR spectrum of PIP- <i>b</i> -PCL 550:550 equivalents generated by <b>6</b> /[Ph <sub>3</sub> C][B(C <sub>6</sub> F <sub>5</sub> ) <sub>4</sub> ] from <b>Table 2</b> , entry 2 in CDCl <sub>3</sub> at 298 K.                       | <b>S61</b> |
| <b>Fig. S57</b> $^{13}\text{C}$ NMR spectrum of PIP- <i>b</i> -PCL 300:800 equivalents generated by <b>6</b> /[Ph <sub>3</sub> C][B(C <sub>6</sub> F <sub>5</sub> ) <sub>4</sub> ] from <b>Table 2</b> , entry 3 in CDCl <sub>3</sub> at 298 K.                       | <b>S62</b> |
| <b>Fig. S58</b> $^{13}\text{C}$ NMR spectrum of PIP 800 equivalents generated by <b>6</b> /[Ph <sub>3</sub> C][B(C <sub>6</sub> F <sub>5</sub> ) <sub>4</sub> ] from <b>Table 3</b> , entry 1 in CDCl <sub>3</sub> at 298 K (IP addition time 0 min).                 | <b>S63</b> |
| <b>Fig. S59</b> $^{13}\text{C}$ NMR spectrum of PIP 800 equivalents generated by <b>6</b> /[Ph <sub>3</sub> C][B(C <sub>6</sub> F <sub>5</sub> ) <sub>4</sub> ] from <b>Table 3</b> , entry 2 in CDCl <sub>3</sub> at 298 K (IP addition time 30 min).                | <b>S64</b> |
| <b>Fig. S60</b> $^{13}\text{C}$ NMR spectrum of PIP- <i>b</i> -PCL 800:300 equivalents generated by <b>6</b> and 0.5 equivalents of [Ph <sub>3</sub> C][B(C <sub>6</sub> F <sub>5</sub> ) <sub>4</sub> ] from <b>Table 3</b> , entry 3 in CDCl <sub>3</sub> at 298 K. | <b>S65</b> |
| <b>Fig. S61</b> $^{13}\text{C}$ NMR spectrum of PIP- <i>b</i> -PCL 800:300 equivalents generated by <b>6</b> and 1.5 equivalents of [Ph <sub>3</sub> C][B(C <sub>6</sub> F <sub>5</sub> ) <sub>4</sub> ] from <b>Table 3</b> , entry 4 in CDCl <sub>3</sub> at 298 K. | <b>S66</b> |
| <b>Fig. S62</b> $^{13}\text{C}$ NMR spectrum of PMyr 800 equivalents generated by <b>6</b> /[Ph <sub>3</sub> C][B(C <sub>6</sub> F <sub>5</sub> ) <sub>4</sub> ] from <b>Table 4</b> , entry 1 in CDCl <sub>3</sub> at 298 K (30 min).                                | <b>S67</b> |
| <b>Fig. S63</b> $^{13}\text{C}$ NMR spectrum of PMyr 800 equivalents generated by <b>6</b> /[Ph <sub>3</sub> C][B(C <sub>6</sub> F <sub>5</sub> ) <sub>4</sub> ] from <b>Table 4</b> , entry 2 in CDCl <sub>3</sub> at 298 K (90 min).                                | <b>S67</b> |
| <b>Fig. S64</b> $^{13}\text{C}$ NMR spectrum of PMyr 800 equivalents generated by <b>6</b> /[Ph <sub>3</sub> C][B(C <sub>6</sub> F <sub>5</sub> ) <sub>4</sub> ] from <b>Table 4</b> , entry 3 in CDCl <sub>3</sub> at 298 K (3 h).                                   | <b>S68</b> |
| <b>Fig. S65</b> $^{13}\text{C}$ NMR spectrum of PS 800 equivalents generated by <b>6</b> /[Ph <sub>3</sub> C][B(C <sub>6</sub> F <sub>5</sub> ) <sub>4</sub> ] from <b>Table 4</b> , entry 4 in CDCl <sub>3</sub> at 298 K (30 min).                                  | <b>S68</b> |
| <b>Fig. S66</b> $^{13}\text{C}$ NMR spectrum of PS 800 equivalents generated by <b>6</b> /[Ph <sub>3</sub> C][B(C <sub>6</sub> F <sub>5</sub> ) <sub>4</sub> ] from <b>Table 4</b> , entry 5 in CDCl <sub>3</sub> at 298 K (20 h).                                    | <b>S69</b> |
| <b>Fig. S67</b> $^{13}\text{C}$ NMR spectrum of PVL 300 equivalents generated by <b>6</b> /[Ph <sub>3</sub> C][B(C <sub>6</sub> F <sub>5</sub> ) <sub>4</sub> ] from <b>Table 4</b> , entry 6 in CDCl <sub>3</sub> at 298 K (10 min).                                 | <b>S69</b> |
| <b>Fig. S68</b> $^{13}\text{C}$ NMR spectrum of PDL 300 equivalents generated by <b>6</b> /[Ph <sub>3</sub> C][B(C <sub>6</sub> F <sub>5</sub> ) <sub>4</sub> ] from <b>Table 4</b> , entry 7 in CDCl <sub>3</sub> at 298 K (30 min).                                 | <b>S70</b> |
| <b>Fig. S69</b> $^{13}\text{C}$ NMR spectrum of PIP- <i>b</i> -PVL 800:300 equivalents generated by <b>6</b> /[Ph <sub>3</sub> C][B(C <sub>6</sub> F <sub>5</sub> ) <sub>4</sub> ] from <b>Table 5</b> , entry 1 in CDCl <sub>3</sub> at 298 K.                       | <b>S70</b> |
| <b>Fig. S70</b> $^{13}\text{C}$ NMR spectrum of PIP- <i>b</i> -PDL 800:300 equivalents generated by <b>6</b> /[Ph <sub>3</sub> C][B(C <sub>6</sub> F <sub>5</sub> ) <sub>4</sub> ] from <b>Table 5</b> , entry 2 in CDCl <sub>3</sub> at 298 K.                       | <b>S71</b> |
| <b>Fig. S71</b> $^{13}\text{C}$ NMR spectrum of PMyr- <i>b</i> -PCL 800:300 equivalents generated by <b>6</b> /[Ph <sub>3</sub> C][B(C <sub>6</sub> F <sub>5</sub> ) <sub>4</sub> ] from <b>Table 5</b> , entry 3 in CDCl <sub>3</sub> at 298 K.                      | <b>S71</b> |
| <b>Fig. S72</b> $^{13}\text{C}$ NMR spectrum of PMyr- <i>b</i> -PVL 800:300 equivalents generated by <b>6</b> /[Ph <sub>3</sub> C][B(C <sub>6</sub> F <sub>5</sub> ) <sub>4</sub> ] from <b>Table 5</b> , entry 4 in CDCl <sub>3</sub> at 298 K.                      | <b>S72</b> |
| <b>Fig. S73</b> $^{13}\text{C}$ NMR spectrum of PMyr- <i>b</i> -PDL 800:300 equivalents generated by <b>6</b> /[Ph <sub>3</sub> C][B(C <sub>6</sub> F <sub>5</sub> ) <sub>4</sub> ] from <b>Table 5</b> , entry 5 in CDCl <sub>3</sub> at 298 K.                      | <b>S72</b> |
| <b>Fig. S74</b> $^{13}\text{C}$ NMR spectrum of PMyr 800 equivalents generated by <b>8</b> /[Ph <sub>3</sub> C][B(C <sub>6</sub> F <sub>5</sub> ) <sub>4</sub> ] from <b>Table S1</b> , entry 1 in CDCl <sub>3</sub> at 298 K (30 min).                               | <b>S73</b> |

|                                                                                                                                                                                                                                                                  |            |
|------------------------------------------------------------------------------------------------------------------------------------------------------------------------------------------------------------------------------------------------------------------|------------|
| <b>Fig. S75</b> $^{13}\text{C}$ NMR spectrum of PS 800 equivalents generated by <b>8</b> /[Ph <sub>3</sub> C][B(C <sub>6</sub> F <sub>5</sub> ) <sub>4</sub> ] from <b>Table S1</b> , entry 2 in CDCl <sub>3</sub> at 298 K (30 min).                            | <b>S73</b> |
| <b>Fig. S76</b> $^{13}\text{C}$ NMR spectrum of PVL 300 equivalents generated by <b>8</b> /[Ph <sub>3</sub> C][B(C <sub>6</sub> F <sub>5</sub> ) <sub>4</sub> ] from <b>Table S1</b> , entry 3 in CDCl <sub>3</sub> at 298 K (10 min).                           | <b>S74</b> |
| <b>Fig. S77</b> $^{13}\text{C}$ NMR spectrum of PDL 300 equivalents generated by <b>8</b> /[Ph <sub>3</sub> C][B(C <sub>6</sub> F <sub>5</sub> ) <sub>4</sub> ] from <b>Table S1</b> , entry 4 in CDCl <sub>3</sub> at 298 K (6 h).                              | <b>S74</b> |
| <b>Fig. S78</b> $^{13}\text{C}$ NMR spectrum of PIP 300 equivalents generated by <b>6</b> /[Ph <sub>3</sub> C][B(C <sub>6</sub> F <sub>5</sub> ) <sub>4</sub> ] from <b>Table S2</b> , entry 1 in CDCl <sub>3</sub> at 298 K (12 h).                             | <b>S75</b> |
| <b>Fig. S79</b> $^{13}\text{C}$ NMR spectrum of PIP 550 equivalents generated by <b>6</b> /[Ph <sub>3</sub> C][B(C <sub>6</sub> F <sub>5</sub> ) <sub>4</sub> ] from <b>Table S2</b> , entry 2 in CDCl <sub>3</sub> at 298 K (12 h).                             | <b>S76</b> |
| <b>Fig. S80</b> $^{13}\text{C}$ NMR spectrum of PCL 550 equivalents generated by <b>6</b> /[Ph <sub>3</sub> C][B(C <sub>6</sub> F <sub>5</sub> ) <sub>4</sub> ] from <b>Table S2</b> , entry 3 in CDCl <sub>3</sub> at 298 K (12 h).                             | <b>S77</b> |
| <b>Fig. S81</b> $^{13}\text{C}$ NMR spectrum of PCL 800 equivalents generated by <b>6</b> /[Ph <sub>3</sub> C][B(C <sub>6</sub> F <sub>5</sub> ) <sub>4</sub> ] from <b>Table S2</b> , entry 4 in CDCl <sub>3</sub> at 298 K (12 h).                             | <b>S78</b> |
| <b>Fig. S82</b> $^{13}\text{C}$ NMR spectrum of PCL 800 equivalents generated by <b>6</b> from <b>Table S2</b> , entry 5 in CDCl <sub>3</sub> at 298 K (No [Ph <sub>3</sub> C][B(C <sub>6</sub> F <sub>5</sub> ) <sub>4</sub> ] added) (10 min).                 | <b>S79</b> |
| <b>Fig. S83</b> $^{13}\text{C}$ NMR spectrum of PIP 50 equivalents generated by <b>6</b> /[Ph <sub>3</sub> C][B(C <sub>6</sub> F <sub>5</sub> ) <sub>4</sub> ] from <b>Table S3</b> , entry 1 in CDCl <sub>3</sub> at 298 K (12 h).                              | <b>S79</b> |
| <b>Fig. S84</b> $^{13}\text{C}$ NMR spectrum of PIP- <i>b</i> -PCL 50:50 equivalents generated by <b>6</b> /[Ph <sub>3</sub> C][B(C <sub>6</sub> F <sub>5</sub> ) <sub>4</sub> ] from <b>Table S3</b> , entry 2 in CDCl <sub>3</sub> at 298 K.                   | <b>S80</b> |
| <b>Fig. S85</b> $^{13}\text{C}$ NMR spectrum of recovered PIP 50 equivalents after hydrolysis of PIP- <i>b</i> -PCL 50:50 from <b>Table S3</b> , entry 3 in CDCl <sub>3</sub> at 298 K (12 h).                                                                   | <b>S80</b> |
| <b>Fig. S86</b> $^{13}\text{C}$ NMR spectrum of PIP- <i>b</i> -PCL 50:50 equivalents generated by <b>Y</b> [N(SiMe <sub>3</sub> ) <sub>2</sub> ] <sub>3</sub> from <b>Table S3</b> , entry 4 in CDCl <sub>3</sub> at 298 K (6 h).                                | <b>S81</b> |
| <b>Fig. S87</b> $^{13}\text{C}$ NMR spectrum of PIP- <i>b</i> -PCL 50:50 equivalents generated by <b>6</b> /[Ph <sub>3</sub> C][B(C <sub>6</sub> F <sub>5</sub> ) <sub>4</sub> ] (1 mL of toluene) from <b>Table S3</b> , entry 5 in CDCl <sub>3</sub> at 298 K. | <b>S81</b> |
| <b>3.3 Diffusion-Ordered Spectroscopy (DOSY)</b>                                                                                                                                                                                                                 | <b>S82</b> |
| <b>Fig. S88</b> DOSY NMR spectrum of PIP- <i>b</i> -PCL 800:300 equivalents generated by <b>6</b> /[Ph <sub>3</sub> C][B(C <sub>6</sub> F <sub>5</sub> ) <sub>4</sub> ] from <b>Table 2</b> , entry 1a in CDCl <sub>3</sub> at 298 K.                            | <b>S82</b> |
| <b>Fig. S89</b> DOSY NMR spectrum of PIP- <i>b</i> -PCL 800:300 equivalents generated by <b>6</b> /[Ph <sub>3</sub> C][B(C <sub>6</sub> F <sub>5</sub> ) <sub>4</sub> ] from <b>Table 2</b> , entry 1b in CDCl <sub>3</sub> at 298 K.                            | <b>S83</b> |
| <b>Fig. S90</b> DOSY NMR spectrum of PIP- <i>b</i> -PCL 800:300 equivalents generated by <b>6</b> /[Ph <sub>3</sub> C][B(C <sub>6</sub> F <sub>5</sub> ) <sub>4</sub> ] from <b>Table 2</b> , entry 1c in CDCl <sub>3</sub> at 298 K.                            | <b>S84</b> |
| <b>Fig. S91</b> DOSY NMR spectrum of PIP- <i>b</i> -PCL 550:550 equivalents generated by <b>6</b> /[Ph <sub>3</sub> C][B(C <sub>6</sub> F <sub>5</sub> ) <sub>4</sub> ] from <b>Table 2</b> , entry 2a in CDCl <sub>3</sub> at 298 K.                            | <b>S85</b> |
| <b>Fig. S92</b> DOSY NMR spectrum of PIP- <i>b</i> -PCL 550:550 equivalents generated by <b>6</b> /[Ph <sub>3</sub> C][B(C <sub>6</sub> F <sub>5</sub> ) <sub>4</sub> ] from <b>Table 2</b> , entry 2b in CDCl <sub>3</sub> at 298 K.                            | <b>S86</b> |
| <b>Fig. S93</b> DOSY NMR spectrum of PIP- <i>b</i> -PCL 550:550 equivalents generated by <b>6</b> /[Ph <sub>3</sub> C][B(C <sub>6</sub> F <sub>5</sub> ) <sub>4</sub> ] from <b>Table 2</b> , entry 2c in CDCl <sub>3</sub> at 298 K.                            | <b>S87</b> |
| <b>Fig. S94</b> DOSY NMR spectrum of PIP- <i>b</i> -PCL 300:800 equivalents generated by <b>6</b> /[Ph <sub>3</sub> C][B(C <sub>6</sub> F <sub>5</sub> ) <sub>4</sub> ] from <b>Table 2</b> , entry 3a in CDCl <sub>3</sub> at 298 K.                            | <b>S88</b> |
| <b>Fig. S95</b> DOSY NMR spectrum of PIP- <i>b</i> -PCL 300:800 equivalents generated by <b>6</b> /[Ph <sub>3</sub> C][B(C <sub>6</sub> F <sub>5</sub> ) <sub>4</sub> ] from <b>Table 2</b> , entry 3b in CDCl <sub>3</sub> at 298 K.                            | <b>S89</b> |
| <b>Fig. S96</b> DOSY NMR spectrum of PIP- <i>b</i> -PCL 300:800 equivalents generated by <b>6</b> /[Ph <sub>3</sub> C][B(C <sub>6</sub> F <sub>5</sub> ) <sub>4</sub> ] from <b>Table 2</b> , entry 3c in CDCl <sub>3</sub> at 298 K.                            | <b>S90</b> |

|                                                                                                                                                                                                                                                              |             |
|--------------------------------------------------------------------------------------------------------------------------------------------------------------------------------------------------------------------------------------------------------------|-------------|
| <b>Fig. S97</b> DOSY NMR spectrum of PIP- <i>b</i> -PCL 800:300 equivalents generated by <b>6</b> and 0.5 equivalents of [Ph <sub>3</sub> C][B(C <sub>6</sub> F <sub>5</sub> ) <sub>4</sub> ] from <b>Table 3</b> , entry 3a in CDCl <sub>3</sub> at 298 K.  | <b>S91</b>  |
| <b>Fig. S98</b> DOSY NMR spectrum of PIP- <i>b</i> -PCL 800:300 equivalents generated by <b>6</b> and 0.5 equivalents of [Ph <sub>3</sub> C][B(C <sub>6</sub> F <sub>5</sub> ) <sub>4</sub> ] from <b>Table 3</b> , entry 3b in CDCl <sub>3</sub> at 298 K.  | <b>S92</b>  |
| <b>Fig. S99</b> DOSY NMR spectrum of PIP- <i>b</i> -PCL 800:300 equivalents generated by <b>6</b> and 0.5 equivalents of [Ph <sub>3</sub> C][B(C <sub>6</sub> F <sub>5</sub> ) <sub>4</sub> ] from <b>Table 3</b> , entry 3c in CDCl <sub>3</sub> at 298 K.  | <b>S93</b>  |
| <b>Fig. S100</b> DOSY NMR spectrum of PIP- <i>b</i> -PCL 800:300 equivalents generated by <b>6</b> and 1.5 equivalents of [Ph <sub>3</sub> C][B(C <sub>6</sub> F <sub>5</sub> ) <sub>4</sub> ] from <b>Table 3</b> , entry 4a in CDCl <sub>3</sub> at 298 K. | <b>S94</b>  |
| <b>Fig. S101</b> DOSY NMR spectrum of PIP- <i>b</i> -PCL 800:300 equivalents generated by <b>6</b> and 1.5 equivalents of [Ph <sub>3</sub> C][B(C <sub>6</sub> F <sub>5</sub> ) <sub>4</sub> ] from <b>Table 3</b> , entry 4b in CDCl <sub>3</sub> at 298 K. | <b>S95</b>  |
| <b>Fig. S102</b> DOSY NMR spectrum of PIP- <i>b</i> -PCL 800:300 equivalents generated by <b>6</b> and 1.5 equivalents of [Ph <sub>3</sub> C][B(C <sub>6</sub> F <sub>5</sub> ) <sub>4</sub> ] from <b>Table 3</b> , entry 4c in CDCl <sub>3</sub> at 298 K. | <b>S96</b>  |
| <b>Fig. S103</b> DOSY NMR spectrum of PIP- <i>b</i> -PVL 800:300 equivalents generated by <b>6</b> /[Ph <sub>3</sub> C][B(C <sub>6</sub> F <sub>5</sub> ) <sub>4</sub> ] from <b>Table 5</b> , entry 1 in CDCl <sub>3</sub> at 298 K.                        | <b>S97</b>  |
| <b>Fig. S104</b> DOSY NMR spectrum of PIP- <i>b</i> -PDL 800:300 equivalents generated by <b>6</b> /[Ph <sub>3</sub> C][B(C <sub>6</sub> F <sub>5</sub> ) <sub>4</sub> ] from <b>Table 5</b> , entry 2 in CDCl <sub>3</sub> at 298 K.                        | <b>S98</b>  |
| <b>Fig. S105</b> DOSY NMR spectrum of PMyr- <i>b</i> -PCL 800:300 equivalents generated by <b>6</b> /[Ph <sub>3</sub> C][B(C <sub>6</sub> F <sub>5</sub> ) <sub>4</sub> ] from <b>Table 5</b> , entry 3 in CDCl <sub>3</sub> at 298 K.                       | <b>S99</b>  |
| <b>Fig. S106</b> DOSY NMR spectrum of PMyr- <i>b</i> -PVL 800:300 equivalents generated by <b>6</b> /[Ph <sub>3</sub> C][B(C <sub>6</sub> F <sub>5</sub> ) <sub>4</sub> ] from <b>Table 5</b> , entry 3 in CDCl <sub>3</sub> at 298 K.                       | <b>S100</b> |
| <b>Fig. S107</b> DOSY NMR spectrum of PMyr- <i>b</i> -PDL 800:300 equivalents generated by <b>6</b> /[Ph <sub>3</sub> C][B(C <sub>6</sub> F <sub>5</sub> ) <sub>4</sub> ] from <b>Table 5</b> , entry 5 in CDCl <sub>3</sub> at 298 K.                       | <b>S101</b> |
| <b>Fig. S108</b> DOSY NMR spectrum of PIP- <i>b</i> -PCL 50:50 equivalents generated by <b>6</b> /[Ph <sub>3</sub> C][B(C <sub>6</sub> F <sub>5</sub> ) <sub>4</sub> ] of from <b>Table S3</b> , entry 2 in CDCl <sub>3</sub> at 298 K.                      | <b>S102</b> |
| <b>Fig. S109</b> DOSY NMR spectrum of repolymerized PIP- <i>b</i> -PCL 50:50 equivalents generated by Y[N(SiMe <sub>3</sub> ) <sub>2</sub> ] <sub>3</sub> from <b>Table S3</b> , entry 4 in CDCl <sub>3</sub> at 298 K.                                      | <b>S103</b> |
| <b>4.0 Fourier-Transform Infrared (FT-IR) Spectroscopy Characterization of Isolated Polymers</b>                                                                                                                                                             | <b>S104</b> |
| <b>Fig. S110</b> FT-IR spectrum of PIP 800 equivalents generated by <b>6</b> /[Ph <sub>3</sub> C][B(C <sub>6</sub> F <sub>5</sub> ) <sub>4</sub> ] from <b>Table 1</b> , entry 1 (12 h).                                                                     | <b>S104</b> |
| <b>Fig. S111</b> FT-IR spectrum of PIP 800 equivalents generated by <b>8</b> /[Ph <sub>3</sub> C][B(C <sub>6</sub> F <sub>5</sub> ) <sub>4</sub> ] from <b>Table 1</b> , entry 3 (12 h).                                                                     | <b>S104</b> |
| <b>Fig. S112</b> FT-IR spectrum of PIP 800 equivalents generated by <b>6</b> /[Ph <sub>3</sub> C][B(C <sub>6</sub> F <sub>5</sub> ) <sub>4</sub> ] from <b>Table 1</b> , entry 4 (24 h).                                                                     | <b>S105</b> |
| <b>Fig. S113</b> FT-IR spectrum of PIP 800 equivalents generated by <b>6</b> /[Ph <sub>3</sub> C][B(C <sub>6</sub> F <sub>5</sub> ) <sub>4</sub> ] from <b>Table 1</b> , entry 5 (30 min).                                                                   | <b>S105</b> |
| <b>Fig. S114</b> FT-IR spectrum of PIP generated by <b>8</b> /[Ph <sub>3</sub> C][B(C <sub>6</sub> F <sub>5</sub> ) <sub>4</sub> ] from <b>Table 1</b> , entry 6 (30 min).                                                                                   | <b>S106</b> |
| <b>Fig. S115</b> FT-IR spectrum of PCL generated by <b>6</b> /[Ph <sub>3</sub> C][B(C <sub>6</sub> F <sub>5</sub> ) <sub>4</sub> ] from <b>Table 1</b> , entry 7 (10 min).                                                                                   | <b>S106</b> |
| <b>Fig. S116</b> FT-IR spectrum of PCL 300 equivalents generated by <b>8</b> /[Ph <sub>3</sub> C][B(C <sub>6</sub> F <sub>5</sub> ) <sub>4</sub> ] from <b>Table 1</b> , entry 8 (10 min).                                                                   | <b>S107</b> |
| <b>Fig. S117</b> FT-IR spectrum of PCL 300 equivalents generated by <b>6</b> /[Ph <sub>3</sub> C][B(C <sub>6</sub> F <sub>5</sub> ) <sub>4</sub> ] from <b>Table 1</b> , entry 9 (2 h).                                                                      | <b>S107</b> |
| <b>Fig. S118</b> FT-IR spectrum of PIP- <i>b</i> -PCL 800:300 equivalents generated by <b>6</b> /[Ph <sub>3</sub> C][B(C <sub>6</sub> F <sub>5</sub> ) <sub>4</sub> ] from <b>Table 2</b> , entry 1.                                                         | <b>S108</b> |

|                                                                                                                                                                                                                            |             |
|----------------------------------------------------------------------------------------------------------------------------------------------------------------------------------------------------------------------------|-------------|
| <b>Fig. S119</b> FT-IR spectrum of PIP- <i>b</i> -PCL 550:550 equivalents generated by <b>6</b> /[Ph <sub>3</sub> C][B(C <sub>6</sub> F <sub>5</sub> ) <sub>4</sub> ] from <b>Table 2</b> , entry 2.                       | <b>S108</b> |
| <b>Fig. S120</b> FT-IR spectrum of PIP- <i>b</i> -PCL 300:800 equivalents generated by <b>6</b> /[Ph <sub>3</sub> C][B(C <sub>6</sub> F <sub>5</sub> ) <sub>4</sub> ] from <b>Table 2</b> , entry 3.                       | <b>S109</b> |
| <b>Fig. S121</b> FT-IR spectrum of PIP 800 equivalents generated by <b>6</b> /[Ph <sub>3</sub> C][B(C <sub>6</sub> F <sub>5</sub> ) <sub>4</sub> ] from <b>Table 3</b> , entry 1 (IP addition time 0 min).                 | <b>S109</b> |
| <b>Fig. S122</b> FT-IR spectrum of PIP 800 equivalents generated by <b>6</b> /[Ph <sub>3</sub> C][B(C <sub>6</sub> F <sub>5</sub> ) <sub>4</sub> ] from <b>Table 3</b> , entry 2 (IP addition time 30 min).                | <b>S110</b> |
| <b>Fig. S123</b> FT-IR spectrum of PIP- <i>b</i> -PCL 800:300 equivalents generated by <b>6</b> and 0.5 equivalents of [Ph <sub>3</sub> C][B(C <sub>6</sub> F <sub>5</sub> ) <sub>4</sub> ] from <b>Table 3</b> , entry 3. | <b>S110</b> |
| <b>Fig. S124</b> FT-IR spectrum of PIP- <i>b</i> -PCL 800:300 equivalents generated by <b>6</b> and 1.5 equivalents of [Ph <sub>3</sub> C][B(C <sub>6</sub> F <sub>5</sub> ) <sub>4</sub> ] from <b>Table 3</b> , entry 4. | <b>S111</b> |
| <b>Fig. S125</b> FT-IR spectrum of PMyr 800 equivalents generated by <b>6</b> /[Ph <sub>3</sub> C][B(C <sub>6</sub> F <sub>5</sub> ) <sub>4</sub> ] from <b>Table 4</b> , entry 1 (30 min).                                | <b>S111</b> |
| <b>Fig. S126</b> FT-IR spectrum of PMyr 800 equivalents generated by <b>6</b> /[Ph <sub>3</sub> C][B(C <sub>6</sub> F <sub>5</sub> ) <sub>4</sub> ] from <b>Table 4</b> , entry 2 (90 min).                                | <b>S112</b> |
| <b>Fig. S127</b> FT-IR spectrum of PMyr 800 equivalents generated by <b>6</b> /[Ph <sub>3</sub> C][B(C <sub>6</sub> F <sub>5</sub> ) <sub>4</sub> ] from <b>Table 4</b> , entry 3 (3 h).                                   | <b>S112</b> |
| <b>Fig. S128</b> FT-IR spectrum of PS 800 equivalents generated by <b>6</b> /[Ph <sub>3</sub> C][B(C <sub>6</sub> F <sub>5</sub> ) <sub>4</sub> ] from <b>Table 4</b> , entry 4 (30 min).                                  | <b>S113</b> |
| <b>Fig. S129</b> FT-IR spectrum of PS 800 equivalents generated by <b>6</b> /[Ph <sub>3</sub> C][B(C <sub>6</sub> F <sub>5</sub> ) <sub>4</sub> ] from <b>Table 4</b> , entry 5 (20 h).                                    | <b>S113</b> |
| <b>Fig. S130</b> FT-IR spectrum of PVL 300 equivalents generated by <b>6</b> /[Ph <sub>3</sub> C][B(C <sub>6</sub> F <sub>5</sub> ) <sub>4</sub> ] from <b>Table 4</b> , entry 6 (10 min).                                 | <b>S114</b> |
| <b>Fig. S131</b> FT-IR spectrum of PDL 300 equivalents generated by <b>6</b> /[Ph <sub>3</sub> C][B(C <sub>6</sub> F <sub>5</sub> ) <sub>4</sub> ] from <b>Table 4</b> , entry 7 (6 h).                                    | <b>S114</b> |
| <b>Fig. S132</b> FT-IR spectrum of PIP- <i>b</i> -PVL 800:300 equivalents generated by <b>6</b> /[Ph <sub>3</sub> C][B(C <sub>6</sub> F <sub>5</sub> ) <sub>4</sub> ] from <b>Table 5</b> , entry 1.                       | <b>S115</b> |
| <b>Fig. S133</b> FT-IR spectrum of PIP- <i>b</i> -PDL 800:300 equivalents generated by <b>6</b> /[Ph <sub>3</sub> C][B(C <sub>6</sub> F <sub>5</sub> ) <sub>4</sub> ] from <b>Table 5</b> , entry 2.                       | <b>S115</b> |
| <b>Fig. S134</b> FT-IR spectrum of PMyr- <i>b</i> -PCL 800:300 equivalents generated by <b>6</b> /[Ph <sub>3</sub> C][B(C <sub>6</sub> F <sub>5</sub> ) <sub>4</sub> ] from <b>Table 5</b> , entry 3.                      | <b>S116</b> |
| <b>Fig. S135</b> FT-IR spectrum of PMyr- <i>b</i> -PVL 800:300 equivalents generated by <b>6</b> /[Ph <sub>3</sub> C][B(C <sub>6</sub> F <sub>5</sub> ) <sub>4</sub> ] from <b>Table 5</b> , entry 4.                      | <b>S116</b> |
| <b>Fig. S136</b> FT-IR spectrum of PMyr- <i>b</i> -PDL 800:300 equivalents generated by <b>6</b> /[Ph <sub>3</sub> C][B(C <sub>6</sub> F <sub>5</sub> ) <sub>4</sub> ] from <b>Table 5</b> , entry 5.                      | <b>S117</b> |
| <b>Fig. S137</b> FT-IR spectrum of PMyr 800 equivalents generated by <b>8</b> /[Ph <sub>3</sub> C][B(C <sub>6</sub> F <sub>5</sub> ) <sub>4</sub> ] from <b>Table S1</b> , entry 1 (30 min).                               | <b>S117</b> |
| <b>Fig. S138</b> FT-IR spectrum of PS 800 equivalents generated by <b>8</b> /[Ph <sub>3</sub> C][B(C <sub>6</sub> F <sub>5</sub> ) <sub>4</sub> ] from <b>Table S1</b> , entry 2 (30 min).                                 | <b>S118</b> |
| <b>Fig. S139</b> FT-IR spectrum of PVL 300 equivalents generated by <b>8</b> /[Ph <sub>3</sub> C][B(C <sub>6</sub> F <sub>5</sub> ) <sub>4</sub> ] from <b>Table S1</b> , entry 3 (10 min).                                | <b>S118</b> |
| <b>Fig. S140</b> FT-IR spectrum of PDL 300 equivalents generated by <b>8</b> /[Ph <sub>3</sub> C][B(C <sub>6</sub> F <sub>5</sub> ) <sub>4</sub> ] from <b>Table S1</b> , entry 4 (6 h).                                   | <b>S119</b> |
| <b>Fig. S141</b> FT-IR spectrum of PIP 300 equivalents generated by <b>6</b> /[Ph <sub>3</sub> C][B(C <sub>6</sub> F <sub>5</sub> ) <sub>4</sub> ] from <b>Table S2</b> , entry 1 (12 h).                                  | <b>S119</b> |

|                                                                                                                                                                                                                 |             |
|-----------------------------------------------------------------------------------------------------------------------------------------------------------------------------------------------------------------|-------------|
| <b>Fig. S142</b> FT-IR spectrum of PIP 550 equivalents generated by <b>6</b> /[Ph <sub>3</sub> C][B(C <sub>6</sub> F <sub>5</sub> ) <sub>4</sub> ] from <b>Table S2</b> , entry 2 (12 h).                       | <b>S120</b> |
| <b>Fig. S143</b> FT-IR spectrum of PCL 550 equivalents generated by <b>6</b> /[Ph <sub>3</sub> C][B(C <sub>6</sub> F <sub>5</sub> ) <sub>4</sub> ] from <b>Table S2</b> , entry 3 (2 h).                        | <b>S120</b> |
| <b>Fig. S144</b> FT-IR spectrum of PCL 800 equivalents generated by <b>6</b> /[Ph <sub>3</sub> C][B(C <sub>6</sub> F <sub>5</sub> ) <sub>4</sub> ] from <b>Table S2</b> , entry 4 (2 h).                        | <b>S121</b> |
| <b>Fig. S145</b> FT-IR spectrum of PCL 300 equivalents generated by <b>6</b> from <b>Table S2</b> , entry 5 (No [Ph <sub>3</sub> C][B(C <sub>6</sub> F <sub>5</sub> ) <sub>4</sub> ] added) (10 min).           | <b>S121</b> |
| <b>Fig. S146</b> FT-IR spectrum of PIP 50 equivalents generated by <b>6</b> /[Ph <sub>3</sub> C][B(C <sub>6</sub> F <sub>5</sub> ) <sub>4</sub> ] from <b>Table S3</b> , entry 1 (12 h).                        | <b>S122</b> |
| <b>Fig. S147</b> FT-IR spectrum of PIP- <i>b</i> -PCL 50:50 equivalents generated by <b>6</b> /[Ph <sub>3</sub> C][B(C <sub>6</sub> F <sub>5</sub> ) <sub>4</sub> ] from <b>Table S3</b> , entry 2.             | <b>S122</b> |
| <b>Fig. S148</b> FT-IR spectrum of recovered PIP 50 equivalents after hydrolysis of PIP- <i>b</i> -PCL 50:50 from <b>Table S3</b> , entry 3 (12 h).                                                             | <b>S123</b> |
| <b>Fig. S149</b> FT-IR spectrum of PIP- <i>b</i> -PCL 50:50 equivalents generated by <b>Y</b> [N(SiMe <sub>3</sub> ) <sub>2</sub> ] <sub>3</sub> from <b>Table S3</b> , entry 4 (6 h).                          | <b>S123</b> |
| <b>5.0 Gel Permeation Chromatography (GPC) Characterization of Isolated Polymers</b>                                                                                                                            | <b>S124</b> |
| <b>Fig. S150</b> GPC spectrum of PIP 800 equivalents generated by <b>6</b> /[Ph <sub>3</sub> C][B(C <sub>6</sub> F <sub>5</sub> ) <sub>4</sub> ] from <b>Table 1</b> , entry 1a (12 h): (left) LS; (right) RI.  | <b>S124</b> |
| <b>Fig. S151</b> GPC spectrum of PIP 800 equivalents generated by <b>6</b> /[Ph <sub>3</sub> C][B(C <sub>6</sub> F <sub>5</sub> ) <sub>4</sub> ] from <b>Table 1</b> , entry 1b (12 h): (left) LS; (right) RI.  | <b>S124</b> |
| <b>Fig. S152</b> GPC spectrum of PIP 800 equivalents generated by <b>6</b> /[Ph <sub>3</sub> C][B(C <sub>6</sub> F <sub>5</sub> ) <sub>4</sub> ] from <b>Table 1</b> , entry 1c (12 h): (left) LS; (right) RI.  | <b>S125</b> |
| <b>Fig. S153</b> GPC spectrum of PIP 800 equivalents generated by <b>8</b> /[Ph <sub>3</sub> C][B(C <sub>6</sub> F <sub>5</sub> ) <sub>4</sub> ] from <b>Table 1</b> , entry 3 (12 h): (left) LS; (right) RI.   | <b>S125</b> |
| <b>Fig. S154</b> GPC spectrum of PIP 800 equivalents generated by <b>6</b> /[Ph <sub>3</sub> C][B(C <sub>6</sub> F <sub>5</sub> ) <sub>4</sub> ] from <b>Table 1</b> , entry 4a (24 h): (left) LS; (right) RI.  | <b>S126</b> |
| <b>Fig. S155</b> GPC spectrum of PIP 800 equivalents generated by <b>6</b> /[Ph <sub>3</sub> C][B(C <sub>6</sub> F <sub>5</sub> ) <sub>4</sub> ] from <b>Table 1</b> , entry 4b (24 h): (left) LS; (right) RI.  | <b>S126</b> |
| <b>Fig. S156</b> GPC spectrum of PIP 800 equivalents generated by <b>6</b> /[Ph <sub>3</sub> C][B(C <sub>6</sub> F <sub>5</sub> ) <sub>4</sub> ] from <b>Table 1</b> , entry 4c (24 h): (left) LS; (right) RI.  | <b>S127</b> |
| <b>Fig. S157</b> GPC spectrum of PIP 800 equivalents generated by <b>6</b> /[Ph <sub>3</sub> C][B(C <sub>6</sub> F <sub>5</sub> ) <sub>4</sub> ] from <b>Table 1</b> , entry 5 (30 min): (left) LS; (right) RI. | <b>S127</b> |
| <b>Fig. S158</b> GPC spectrum of PIP 800 equivalents generated by <b>8</b> /[Ph <sub>3</sub> C][B(C <sub>6</sub> F <sub>5</sub> ) <sub>4</sub> ] from <b>Table 1</b> , entry 6 (30 min): (left) LS; (right) RI. | <b>S128</b> |
| <b>Fig. S159</b> GPC spectrum of PCL 300 equivalents generated by <b>6</b> /[Ph <sub>3</sub> C][B(C <sub>6</sub> F <sub>5</sub> ) <sub>4</sub> ] from <b>Table 1</b> , entry 7 (10 min): (left) LS; (right) RI. | <b>S128</b> |
| <b>Fig. S160</b> GPC spectrum of PCL 300 equivalents generated by <b>8</b> /[Ph <sub>3</sub> C][B(C <sub>6</sub> F <sub>5</sub> ) <sub>4</sub> ] from <b>Table 1</b> , entry 8 (10 min): (left) LS; (right) RI. | <b>S129</b> |
| <b>Fig. S161</b> GPC spectrum of PCL 300 equivalents generated by <b>6</b> /[Ph <sub>3</sub> C][B(C <sub>6</sub> F <sub>5</sub> ) <sub>4</sub> ] from <b>Table 1</b> , entry 9a (2 h): (left) LS; (right) RI.   | <b>S129</b> |
| <b>Fig. S162</b> GPC spectrum of PCL 300 equivalents generated by <b>6</b> /[Ph <sub>3</sub> C][B(C <sub>6</sub> F <sub>5</sub> ) <sub>4</sub> ] from <b>Table 1</b> , entry 9b (2 h): (left) LS; (right) RI.   | <b>S130</b> |
| <b>Fig. S163</b> GPC spectrum of PCL 300 equivalents generated by <b>6</b> /[Ph <sub>3</sub> C][B(C <sub>6</sub> F <sub>5</sub> ) <sub>4</sub> ] from <b>Table 1</b> , entry 9c (2 h): (left) LS; (right) RI.   | <b>S130</b> |

|                                                                                                                                                                                                                                      |             |
|--------------------------------------------------------------------------------------------------------------------------------------------------------------------------------------------------------------------------------------|-------------|
| <b>Fig. S164</b> GPC spectrum of PIP- <i>b</i> -PCL 800:300 equivalents generated by <b>6</b> /[Ph <sub>3</sub> C][B(C <sub>6</sub> F <sub>5</sub> ) <sub>4</sub> ] from <b>Table 2</b> , entry 1a: (left) LS; (right) RI.           | <b>S131</b> |
| <b>Fig. S165</b> GPC spectrum of PIP- <i>b</i> -PCL 800:300 equivalents generated by <b>6</b> /[Ph <sub>3</sub> C][B(C <sub>6</sub> F <sub>5</sub> ) <sub>4</sub> ] from <b>Table 2</b> , entry 1b: (left) LS; (right) RI.           | <b>S131</b> |
| <b>Fig. S166</b> GPC spectrum of PIP- <i>b</i> -PCL 800:300 equivalents generated by <b>6</b> /[Ph <sub>3</sub> C][B(C <sub>6</sub> F <sub>5</sub> ) <sub>4</sub> ] from <b>Table 2</b> , entry 1c: (left) LS; (right) RI.           | <b>S132</b> |
| <b>Fig. S167</b> GPC spectrum of PIP- <i>b</i> -PCL 550:550 equivalents generated by <b>6</b> /[Ph <sub>3</sub> C][B(C <sub>6</sub> F <sub>5</sub> ) <sub>4</sub> ] from <b>Table 2</b> , entry 2a: (left) LS; (right) RI.           | <b>S132</b> |
| <b>Fig. S168</b> GPC spectrum of PIP- <i>b</i> -PCL 550:550 equivalents generated by <b>6</b> /[Ph <sub>3</sub> C][B(C <sub>6</sub> F <sub>5</sub> ) <sub>4</sub> ] from <b>Table 2</b> , entry 2b: (left) LS; (right) RI.           | <b>S132</b> |
| <b>Fig. S169</b> GPC spectrum of PIP- <i>b</i> -PCL 550:550 equivalents generated by <b>6</b> /[Ph <sub>3</sub> C][B(C <sub>6</sub> F <sub>5</sub> ) <sub>4</sub> ] from <b>Table 2</b> , entry 2c: (left) LS; (right) RI.           | <b>S133</b> |
| <b>Fig. S170</b> GPC spectrum of PIP- <i>b</i> -PCL 300:800 equivalents generated by <b>6</b> /[Ph <sub>3</sub> C][B(C <sub>6</sub> F <sub>5</sub> ) <sub>4</sub> ] from <b>Table 2</b> , entry 3a: (left) LS; (right) RI.           | <b>S133</b> |
| <b>Fig. S171</b> GPC spectrum of PIP- <i>b</i> -PCL 300:800 equivalents generated by <b>6</b> /[Ph <sub>3</sub> C][B(C <sub>6</sub> F <sub>5</sub> ) <sub>4</sub> ] from <b>Table 2</b> , entry 3b: (left) LS; (right) RI.           | <b>S134</b> |
| <b>Fig. S172</b> GPC spectrum of PIP- <i>b</i> -PCL 300:800 equivalents generated by <b>6</b> /[Ph <sub>3</sub> C][B(C <sub>6</sub> F <sub>5</sub> ) <sub>4</sub> ] from <b>Table 2</b> , entry 3c: (left) LS; (right) RI.           | <b>S134</b> |
| <b>Fig. S173</b> GPC spectrum of PIP 800 equivalents generated by <b>6</b> /[Ph <sub>3</sub> C][B(C <sub>6</sub> F <sub>5</sub> ) <sub>4</sub> ] from <b>Table 3</b> , entry 1a (IP addition time 0 min): (left) LS; (right) RI.     | <b>S134</b> |
| <b>Fig. S174</b> GPC spectrum of PIP 800 equivalents generated by <b>6</b> /[Ph <sub>3</sub> C][B(C <sub>6</sub> F <sub>5</sub> ) <sub>4</sub> ] from <b>Table 3</b> , entry 1b (IP addition time 0 min): (left) LS; (right) RI.     | <b>S135</b> |
| <b>Fig. S175</b> GPC spectrum of PIP 800 equivalents generated by <b>6</b> /[Ph <sub>3</sub> C][B(C <sub>6</sub> F <sub>5</sub> ) <sub>4</sub> ] from <b>Table 3</b> , entry 1c (IP addition time 0 min): (left) LS; (right) RI.     | <b>S135</b> |
| <b>Fig. S176</b> GPC spectrum of PIP 800 equivalents generated by <b>6</b> /[Ph <sub>3</sub> C][B(C <sub>6</sub> F <sub>5</sub> ) <sub>4</sub> ] from <b>Table 3</b> , entry 2a (IP addition time 30 min): (left) LS; (right) RI.    | <b>S135</b> |
| <b>Fig. S177</b> GPC spectrum of PIP 800 equivalents generated by <b>6</b> /[Ph <sub>3</sub> C][B(C <sub>6</sub> F <sub>5</sub> ) <sub>4</sub> ] from <b>Table 3</b> , entry 2b (IP addition time 30 min): (left) LS; (right) RI.    | <b>S136</b> |
| <b>Fig. S178</b> GPC spectrum of PIP 800 equivalents generated by <b>6</b> /[Ph <sub>3</sub> C][B(C <sub>6</sub> F <sub>5</sub> ) <sub>4</sub> ] from <b>Table 3</b> , entry 2c (IP addition time 30 min): (left) LS; (right) RI.    | <b>S136</b> |
| <b>Fig. S179</b> GPC spectrum of PIP- <i>b</i> -PCL 800:300 generated by <b>6</b> and 0.5 equivalents of [Ph <sub>3</sub> C][B(C <sub>6</sub> F <sub>5</sub> ) <sub>4</sub> ] from <b>Table 3</b> , entry 3a: (left) LS; (right) RI. | <b>S136</b> |
| <b>Fig. S180</b> GPC spectrum of PIP- <i>b</i> -PCL 800:300 generated by <b>6</b> and 0.5 equivalents of [Ph <sub>3</sub> C][B(C <sub>6</sub> F <sub>5</sub> ) <sub>4</sub> ] from <b>Table 3</b> , entry 3b: (left) LS; (right) RI. | <b>S137</b> |
| <b>Fig. S181</b> GPC spectrum of PIP- <i>b</i> -PCL 800:300 generated by <b>6</b> and 0.5 equivalents of [Ph <sub>3</sub> C][B(C <sub>6</sub> F <sub>5</sub> ) <sub>4</sub> ] from <b>Table 3</b> , entry 3c: (left) LS; (right) RI. | <b>S137</b> |
| <b>Fig. S182</b> GPC spectrum of PIP- <i>b</i> -PCL 800:300 generated by <b>6</b> and 1.5 equivalents of [Ph <sub>3</sub> C][B(C <sub>6</sub> F <sub>5</sub> ) <sub>4</sub> ] from <b>Table 3</b> , entry 4a: (left) LS; (right) RI. | <b>S137</b> |
| <b>Fig. S183</b> GPC spectrum of PIP- <i>b</i> -PCL 800:300 generated by <b>6</b> and 1.5 equivalents of [Ph <sub>3</sub> C][B(C <sub>6</sub> F <sub>5</sub> ) <sub>4</sub> ] from <b>Table 3</b> , entry 4b: (left) LS; (right) RI. | <b>S138</b> |
| <b>Fig. S184</b> GPC spectrum of PIP- <i>b</i> -PCL 800:300 generated by <b>6</b> and 1.5 equivalents of [Ph <sub>3</sub> C][B(C <sub>6</sub> F <sub>5</sub> ) <sub>4</sub> ] from <b>Table 3</b> , entry 4c: (left) LS; (right) RI. | <b>S138</b> |
| <b>Fig. S185</b> GPC spectrum of PMyr generated by <b>6</b> /[Ph <sub>3</sub> C][B(C <sub>6</sub> F <sub>5</sub> ) <sub>4</sub> ] from <b>Table 4</b> , entry 1 (30 min): (left) LS; (right) RI.                                     | <b>S139</b> |
| <b>Fig. S186</b> GPC spectrum of PMyr generated by <b>6</b> /[Ph <sub>3</sub> C][B(C <sub>6</sub> F <sub>5</sub> ) <sub>4</sub> ] from <b>Table 4</b> , entry 2 (90 min): (left) LS; (right) RI.                                     | <b>S139</b> |

|                                                                                                                                                                                                                            |             |
|----------------------------------------------------------------------------------------------------------------------------------------------------------------------------------------------------------------------------|-------------|
| <b>Fig. S187</b> GPC spectrum of PMyr generated by <b>6</b> /[Ph <sub>3</sub> C][B(C <sub>6</sub> F <sub>5</sub> ) <sub>4</sub> ] from <b>Table 4</b> , entry 3 (3 h): (left) LS; (right) RI.                              | <b>S140</b> |
| <b>Fig. S188</b> GPC spectrum of PS generated by <b>6</b> /[Ph <sub>3</sub> C][B(C <sub>6</sub> F <sub>5</sub> ) <sub>4</sub> ] from <b>Table 4</b> , entry 4 (30 min): (left) LS; (right) RI.                             | <b>S140</b> |
| <b>Fig. S189</b> GPC spectrum of PS generated by <b>6</b> /[Ph <sub>3</sub> C][B(C <sub>6</sub> F <sub>5</sub> ) <sub>4</sub> ] from <b>Table 4</b> , entry 5 (20 h): (left) LS; (right) RI.                               | <b>S141</b> |
| <b>Fig. S190</b> GPC spectrum of PVL generated by <b>6</b> /[Ph <sub>3</sub> C][B(C <sub>6</sub> F <sub>5</sub> ) <sub>4</sub> ] from <b>Table 4</b> , entry 6 (10 min): (left) LS; (right) RI.                            | <b>S141</b> |
| <b>Fig. S191</b> GPC spectrum of PDL generated by <b>6</b> /[Ph <sub>3</sub> C][B(C <sub>6</sub> F <sub>5</sub> ) <sub>4</sub> ] from <b>Table 4</b> , entry 7 (6 h): (left) LS; (right) RI.                               | <b>S141</b> |
| <b>Fig. S192</b> GPC spectrum of PIP- <i>b</i> -PVL 800:300 equivalents generated by <b>6</b> /[Ph <sub>3</sub> C][B(C <sub>6</sub> F <sub>5</sub> ) <sub>4</sub> ] from <b>Table 5</b> , entry 1: (left) LS; (right) RI.  | <b>S142</b> |
| <b>Fig. S193</b> GPC spectrum of PIP- <i>b</i> -PDL 800:300 equivalents generated by <b>6</b> /[Ph <sub>3</sub> C][B(C <sub>6</sub> F <sub>5</sub> ) <sub>4</sub> ] from <b>Table 5</b> , entry 2: (left) LS; (right) RI.  | <b>S142</b> |
| <b>Fig. S194</b> GPC spectrum of PMyr- <i>b</i> -PCL 800:300 equivalents generated by <b>6</b> /[Ph <sub>3</sub> C][B(C <sub>6</sub> F <sub>5</sub> ) <sub>4</sub> ] from <b>Table 5</b> , entry 3: (left) LS; (right) RI. | <b>S143</b> |
| <b>Fig. S195</b> GPC spectrum of PMyr- <i>b</i> -PVL 800:300 equivalents generated by <b>6</b> /[Ph <sub>3</sub> C][B(C <sub>6</sub> F <sub>5</sub> ) <sub>4</sub> ] from <b>Table 5</b> , entry 4: (left) LS; (right) RI. | <b>S143</b> |
| <b>Fig. S196</b> GPC spectrum of PMyr- <i>b</i> -PDL 800:300 equivalents generated by <b>6</b> /[Ph <sub>3</sub> C][B(C <sub>6</sub> F <sub>5</sub> ) <sub>4</sub> ] from <b>Table 5</b> , entry 5: (left) LS; (right) RI. | <b>S143</b> |
| <b>Fig. S197</b> GPC spectrum of PMyr 800 equivalents generated by <b>8</b> /[Ph <sub>3</sub> C][B(C <sub>6</sub> F <sub>5</sub> ) <sub>4</sub> ] from <b>Table S1</b> , entry 1 (30min): (left) LS; (right) RI.           | <b>S144</b> |
| <b>Fig. S198</b> GPC spectrum of PS 800 equivalents generated by <b>8</b> /[Ph <sub>3</sub> C][B(C <sub>6</sub> F <sub>5</sub> ) <sub>4</sub> ] from <b>Table S1</b> , entry 2 (30 min): (left) LS; (right) RI.            | <b>S144</b> |
| <b>Fig. S199</b> GPC spectrum of PVL 300 equivalents generated by <b>8</b> /[Ph <sub>3</sub> C][B(C <sub>6</sub> F <sub>5</sub> ) <sub>4</sub> ] from <b>Table S1</b> , entry 3 (10 min): (left) LS; (right) RI.           | <b>S144</b> |
| <b>Fig. S200</b> GPC spectrum of PDL 300 equivalents generated by <b>8</b> /[Ph <sub>3</sub> C][B(C <sub>6</sub> F <sub>5</sub> ) <sub>4</sub> ] from <b>Table S1</b> , entry 4 (6 h): (left) LS; (right) RI.              | <b>S145</b> |
| <b>Fig. S201</b> GPC spectrum of PIP 300 equivalents generated by <b>6</b> /[Ph <sub>3</sub> C][B(C <sub>6</sub> F <sub>5</sub> ) <sub>4</sub> ] from <b>Table S2</b> , entry 1a (12 h): (left) LS; (right) RI.            | <b>S145</b> |
| <b>Fig. S202</b> GPC spectrum of PIP 300 equivalents generated by <b>6</b> /[Ph <sub>3</sub> C][B(C <sub>6</sub> F <sub>5</sub> ) <sub>4</sub> ] from <b>Table S2</b> , entry 1b (12 h): (left) LS; (right) RI.            | <b>S145</b> |
| <b>Fig. S203</b> GPC spectrum of PIP 300 equivalents generated by <b>6</b> /[Ph <sub>3</sub> C][B(C <sub>6</sub> F <sub>5</sub> ) <sub>4</sub> ] from <b>Table S2</b> , entry 1c (12 h): (left) LS; (right) RI.            | <b>S146</b> |
| <b>Fig. S204</b> GPC spectrum of PIP 550 equivalents generated by <b>6</b> /[Ph <sub>3</sub> C][B(C <sub>6</sub> F <sub>5</sub> ) <sub>4</sub> ] from <b>Table S2</b> , entry 2a (12 h): (left) LS; (right) RI.            | <b>S146</b> |
| <b>Fig. S205</b> GPC spectrum of PIP 550 equivalents generated by <b>6</b> /[Ph <sub>3</sub> C][B(C <sub>6</sub> F <sub>5</sub> ) <sub>4</sub> ] from <b>Table S2</b> , entry 2b (12 h): (left) LS; (right) RI.            | <b>S146</b> |
| <b>Fig. S206</b> GPC spectrum of PIP 550 equivalents generated by <b>6</b> /[Ph <sub>3</sub> C][B(C <sub>6</sub> F <sub>5</sub> ) <sub>4</sub> ] from <b>Table S2</b> , entry 2c (12 h): (left) LS; (right) RI.            | <b>S147</b> |
| <b>Fig. S207</b> GPC spectrum of PCL 550 equivalents generated by <b>6</b> /[Ph <sub>3</sub> C][B(C <sub>6</sub> F <sub>5</sub> ) <sub>4</sub> ] from <b>Table S2</b> , entry 3a (2 h): (left) LS; (right) RI.             | <b>S147</b> |
| <b>Fig. S208</b> GPC spectrum of PCL 550 equivalents generated by <b>6</b> /[Ph <sub>3</sub> C][B(C <sub>6</sub> F <sub>5</sub> ) <sub>4</sub> ] from <b>Table S2</b> , entry 3b (2 h): (left) LS; (right) RI.             | <b>S148</b> |
| <b>Fig. S209</b> GPC spectrum of PCL 550 equivalents generated by <b>6</b> /[Ph <sub>3</sub> C][B(C <sub>6</sub> F <sub>5</sub> ) <sub>4</sub> ] from <b>Table S2</b> , entry 3c (2 h): (left) LS; (right) RI.             | <b>S148</b> |

|                                                                                                                                                                                                                                            |             |
|--------------------------------------------------------------------------------------------------------------------------------------------------------------------------------------------------------------------------------------------|-------------|
| <b>Fig. S210</b> GPC spectrum of PCL 800 equivalents generated by <b>6</b> /[Ph <sub>3</sub> C][B(C <sub>6</sub> F <sub>5</sub> ) <sub>4</sub> ] from <b>Table S2</b> , entry 4a (2 h): (left) LS; (right) RI.                             | <b>S148</b> |
| <b>Fig. S211</b> GPC spectrum of PCL 800 equivalents generated by <b>6</b> /[Ph <sub>3</sub> C][B(C <sub>6</sub> F <sub>5</sub> ) <sub>4</sub> ] from <b>Table S2</b> , entry 4b (2 h): (left) LS; (right) RI.                             | <b>S149</b> |
| <b>Fig. S212</b> GPC spectrum of PCL 800 equivalents generated by <b>6</b> /[Ph <sub>3</sub> C][B(C <sub>6</sub> F <sub>5</sub> ) <sub>4</sub> ] from <b>Table S2</b> , entry 4c (2 h): (left) LS; (right) RI.                             | <b>S149</b> |
| <b>Fig. S213</b> GPC spectrum of PCL 300 equivalents generated by <b>6</b> from <b>Table S2</b> , entry 5 (No [Ph <sub>3</sub> C][B(C <sub>6</sub> F <sub>5</sub> ) <sub>4</sub> ] added) (10 min): (left) LS; (right) RI.                 | <b>S150</b> |
| <b>Fig. S214</b> GPC spectrum of PIP 50 equivalents generated by <b>6</b> /[Ph <sub>3</sub> C][B(C <sub>6</sub> F <sub>5</sub> ) <sub>4</sub> ] from <b>Table S3</b> , entry 1 (12 h): (left) LS; (right) RI.                              | <b>S150</b> |
| <b>Fig. S215</b> GPC spectrum of PIP- <i>b</i> -PCL 50:50 equivalents generated by <b>6</b> /[Ph <sub>3</sub> C][B(C <sub>6</sub> F <sub>5</sub> ) <sub>4</sub> ] from <b>Table S3</b> , entry 2: (left) LS; (right) RI.                   | <b>S151</b> |
| <b>Fig. S216</b> GPC spectrum of recovered PIP 50 equivalents after hydrolysis of PIP- <i>b</i> -PCL 50:50 from <b>Table S3</b> , entry 3 (12 h): (left) LS; (right) RI.                                                                   | <b>S151</b> |
| <b>Fig. S217</b> GPC spectrum of repolymerized PIP- <i>b</i> -PCL 50:50 equivalents generated by <b>Y</b> [N(SiMe <sub>3</sub> ) <sub>2</sub> ] <sub>3</sub> from <b>Table S3</b> , entry 4 (6 h): (left) LS; (right) RI.                  | <b>S152</b> |
| <b>Fig. S218</b> GPC spectrum of PIP- <i>b</i> -PCL 50:50 equivalents generated by <b>6</b> /[Ph <sub>3</sub> C][B(C <sub>6</sub> F <sub>5</sub> ) <sub>4</sub> ] (1 mL of toluene) from <b>Table S3</b> , entry 5: (left) LS; (right) RI. | <b>S152</b> |
| <b>6.0 Thermogravimetric Analysis (TGA) of Isolated Polymers</b>                                                                                                                                                                           | <b>S153</b> |
| <b>Fig. S219</b> TGA curve of PIP 800 equivalents generated by <b>6</b> /[Ph <sub>3</sub> C][B(C <sub>6</sub> F <sub>5</sub> ) <sub>4</sub> ] from <b>Table 1</b> , entry 1a (12 h).                                                       | <b>S153</b> |
| <b>Fig. S220</b> TGA curve of PIP 800 equivalents generated by <b>6</b> /[Ph <sub>3</sub> C][B(C <sub>6</sub> F <sub>5</sub> ) <sub>4</sub> ] from <b>Table 1</b> , entry 1b (12 h).                                                       | <b>S153</b> |
| <b>Fig. S221</b> TGA curve of PIP 800 equivalents generated by <b>6</b> /[Ph <sub>3</sub> C][B(C <sub>6</sub> F <sub>5</sub> ) <sub>4</sub> ] from <b>Table 1</b> , entry 1c (12 h).                                                       | <b>S154</b> |
| <b>Fig. S222</b> TGA curve of PIP 800 equivalents generated by <b>8</b> /[Ph <sub>3</sub> C][B(C <sub>6</sub> F <sub>5</sub> ) <sub>4</sub> ] from <b>Table 1</b> , entry 3 (12 h).                                                        | <b>S154</b> |
| <b>Fig. S223</b> TGA curve of PIP 800 equivalents generated by <b>6</b> /[Ph <sub>3</sub> C][B(C <sub>6</sub> F <sub>5</sub> ) <sub>4</sub> ] from <b>Table 1</b> , entry 4 (24 h).                                                        | <b>S155</b> |
| <b>Fig. S224</b> TGA curve of PIP 800 equivalents generated by <b>6</b> /[Ph <sub>3</sub> C][B(C <sub>6</sub> F <sub>5</sub> ) <sub>4</sub> ] from <b>Table 1</b> , entry 5 (30 min).                                                      | <b>S155</b> |
| <b>Fig. S225</b> TGA curve of PIP 800 equivalents generated by <b>8</b> /[Ph <sub>3</sub> C][B(C <sub>6</sub> F <sub>5</sub> ) <sub>4</sub> ] from <b>Table 1</b> , entry 6 (30 min).                                                      | <b>S156</b> |
| <b>Fig. S226</b> TGA curve of PCL 300 equivalents generated by <b>6</b> /[Ph <sub>3</sub> C][B(C <sub>6</sub> F <sub>5</sub> ) <sub>4</sub> ] from <b>Table 1</b> , entry 7 (10 min).                                                      | <b>S156</b> |
| <b>Fig. S227</b> TGA curve of PCL 300 equivalents generated by <b>8</b> /[Ph <sub>3</sub> C][B(C <sub>6</sub> F <sub>5</sub> ) <sub>4</sub> ] from <b>Table 1</b> , entry 8 (10 min).                                                      | <b>S157</b> |
| <b>Fig. S228</b> TGA curve of PCL 300 equivalents generated by <b>6</b> /[Ph <sub>3</sub> C][B(C <sub>6</sub> F <sub>5</sub> ) <sub>4</sub> ] from <b>Table 1</b> , entry 9a (2 h).                                                        | <b>S157</b> |
| <b>Fig. S229</b> TGA curve of PCL 300 equivalents generated by <b>6</b> /[Ph <sub>3</sub> C][B(C <sub>6</sub> F <sub>5</sub> ) <sub>4</sub> ] from <b>Table 1</b> , entry 9b (2 h).                                                        | <b>S158</b> |
| <b>Fig. S230</b> TGA curve of PCL 300 equivalents generated by <b>6</b> /[Ph <sub>3</sub> C][B(C <sub>6</sub> F <sub>5</sub> ) <sub>4</sub> ] from <b>Table 1</b> , entry 9c (2 h).                                                        | <b>S158</b> |
| <b>Fig. S231</b> TGA curve of PIP- <i>b</i> -PCL 800:300 equivalents generated by <b>6</b> /[Ph <sub>3</sub> C][B(C <sub>6</sub> F <sub>5</sub> ) <sub>4</sub> ] from <b>Table 2</b> , entry 1a.                                           | <b>S159</b> |



|                                                                                                                                                                                                                        |             |
|------------------------------------------------------------------------------------------------------------------------------------------------------------------------------------------------------------------------|-------------|
| <b>Fig. S232</b> TGA curve of PIP- <i>b</i> -PCL 800:300 equivalents generated by <b>6</b> /[Ph <sub>3</sub> C][B(C <sub>6</sub> F <sub>5</sub> ) <sub>4</sub> ] from <b>Table 2</b> , entry 1b.                       | <b>S159</b> |
| <b>Fig. S233</b> TGA curve of PIP- <i>b</i> -PCL 800:300 equivalents generated by <b>6</b> /[Ph <sub>3</sub> C][B(C <sub>6</sub> F <sub>5</sub> ) <sub>4</sub> ] from <b>Table 2</b> , entry 1c.                       | <b>S160</b> |
| <b>Fig. S234</b> TGA curve of PIP- <i>b</i> -PCL 550:550 equivalents generated by <b>6</b> /[Ph <sub>3</sub> C][B(C <sub>6</sub> F <sub>5</sub> ) <sub>4</sub> ] from <b>Table 2</b> , entry 2a.                       | <b>S160</b> |
| <b>Fig. S235</b> TGA curve of PIP- <i>b</i> -PCL 550:550 equivalents generated by <b>6</b> /[Ph <sub>3</sub> C][B(C <sub>6</sub> F <sub>5</sub> ) <sub>4</sub> ] from <b>Table 2</b> , entry 2b.                       | <b>S161</b> |
| <b>Fig. S236</b> TGA curve of PIP- <i>b</i> -PCL 550:550 equivalents generated by <b>6</b> /[Ph <sub>3</sub> C][B(C <sub>6</sub> F <sub>5</sub> ) <sub>4</sub> ] from <b>Table 2</b> , entry 2c.                       | <b>S161</b> |
| <b>Fig. S237</b> TGA curve of PIP- <i>b</i> -PCL 300:800 equivalents generated by <b>6</b> /[Ph <sub>3</sub> C][B(C <sub>6</sub> F <sub>5</sub> ) <sub>4</sub> ] from <b>Table 2</b> , entry 3a.                       | <b>S162</b> |
| <b>Fig. S238</b> TGA curve of PIP- <i>b</i> -PCL 300:800 equivalents generated by <b>6</b> /[Ph <sub>3</sub> C][B(C <sub>6</sub> F <sub>5</sub> ) <sub>4</sub> ] from <b>Table 2</b> , entry 3b.                       | <b>S162</b> |
| <b>Fig. S239</b> TGA curve of PIP- <i>b</i> -PCL 300:800 equivalents generated by <b>6</b> /[Ph <sub>3</sub> C][B(C <sub>6</sub> F <sub>5</sub> ) <sub>4</sub> ] from <b>Table 2</b> entry 3c.                         | <b>S163</b> |
| <b>Fig. S240</b> TGA curve of PIP 800 equivalents generated by <b>6</b> /[Ph <sub>3</sub> C][B(C <sub>6</sub> F <sub>5</sub> ) <sub>4</sub> ] from <b>Table 3</b> , entry 1a (IP addition time 0 min).                 | <b>S163</b> |
| <b>Fig. S241</b> TGA curve of PIP 800 equivalents generated by <b>6</b> /[Ph <sub>3</sub> C][B(C <sub>6</sub> F <sub>5</sub> ) <sub>4</sub> ] from <b>Table 3</b> , entry 1b (IP addition time 0 min).                 | <b>S164</b> |
| <b>Fig. S242</b> TGA curve of PIP 800 equivalents generated by <b>6</b> /[Ph <sub>3</sub> C][B(C <sub>6</sub> F <sub>5</sub> ) <sub>4</sub> ] from <b>Table 3</b> , entry 1c (IP addition time 0 min).                 | <b>S164</b> |
| <b>Fig. S243</b> TGA curve of PIP 800 equivalents generated by <b>6</b> /[Ph <sub>3</sub> C][B(C <sub>6</sub> F <sub>5</sub> ) <sub>4</sub> ] from <b>Table 3</b> , entry 2a (IP addition time 30 min).                | <b>S165</b> |
| <b>Fig. S244</b> TGA curve of PIP 800 equivalents generated by <b>6</b> /[Ph <sub>3</sub> C][B(C <sub>6</sub> F <sub>5</sub> ) <sub>4</sub> ] from <b>Table 3</b> , entry 2b (IP addition time 30 min).                | <b>S165</b> |
| <b>Fig. S245</b> TGA curve of PIP 800 equivalents generated by <b>6</b> /[Ph <sub>3</sub> C][B(C <sub>6</sub> F <sub>5</sub> ) <sub>4</sub> ] from <b>Table 3</b> , entry 2c (IP addition time 30 min).                | <b>S166</b> |
| <b>Fig. S246</b> TGA curve of PIP- <i>b</i> -PCL 800:300 equivalents generated by <b>6</b> and 0.5 equivalents of [Ph <sub>3</sub> C][B(C <sub>6</sub> F <sub>5</sub> ) <sub>4</sub> ] from <b>Table 3</b> , entry 3a. | <b>S166</b> |
| <b>Fig. S247</b> TGA curve of PIP- <i>b</i> -PCL 800:300 equivalents generated by <b>6</b> and 0.5 equivalents of [Ph <sub>3</sub> C][B(C <sub>6</sub> F <sub>5</sub> ) <sub>4</sub> ] from <b>Table 3</b> , entry 3b. | <b>S167</b> |
| <b>Fig. S248</b> TGA curve of PIP- <i>b</i> -PCL 800:300 equivalents generated by <b>6</b> and 0.5 equivalents of [Ph <sub>3</sub> C][B(C <sub>6</sub> F <sub>5</sub> ) <sub>4</sub> ] from <b>Table 3</b> , entry 3c. | <b>S167</b> |
| <b>Fig. S249</b> TGA curve of PIP- <i>b</i> -PCL 800:300 equivalents generated by <b>6</b> and 1.5 equivalents of [Ph <sub>3</sub> C][B(C <sub>6</sub> F <sub>5</sub> ) <sub>4</sub> ] from <b>Table 3</b> , entry 4a. | <b>S168</b> |
| <b>Fig. S250</b> TGA curve of PIP- <i>b</i> -PCL 800:300 equivalents generated by <b>6</b> and 1.5 equivalents of [Ph <sub>3</sub> C][B(C <sub>6</sub> F <sub>5</sub> ) <sub>4</sub> ] from <b>Table 3</b> , entry 4b. | <b>S168</b> |
| <b>Fig. S251</b> TGA curve of PIP- <i>b</i> -PCL 800:300 equivalents generated by <b>6</b> and 1.5 equivalents of [Ph <sub>3</sub> C][B(C <sub>6</sub> F <sub>5</sub> ) <sub>4</sub> ] from <b>Table 3</b> , entry 4c. | <b>S169</b> |
| <b>Fig. S252</b> TGA curve of PMyr 800 equivalents generated by <b>6</b> /[Ph <sub>3</sub> C][B(C <sub>6</sub> F <sub>5</sub> ) <sub>4</sub> ] from <b>Table 4</b> , entry 1 (30 min).                                 | <b>S169</b> |
| <b>Fig. S253</b> TGA curve of PMyr 800 equivalents generated by <b>6</b> /[Ph <sub>3</sub> C][B(C <sub>6</sub> F <sub>5</sub> ) <sub>4</sub> ] from <b>Table 4</b> , entry 2 (90 min).                                 | <b>S170</b> |
| <b>Fig. S254</b> TGA curve of PMyr 800 equivalents generated by <b>6</b> /[Ph <sub>3</sub> C][B(C <sub>6</sub> F <sub>5</sub> ) <sub>4</sub> ] from <b>Table 4</b> , entry 3 (3 h).                                    | <b>S170</b> |

|                                                                                                                                                                                                  |             |
|--------------------------------------------------------------------------------------------------------------------------------------------------------------------------------------------------|-------------|
| <b>Fig. S255</b> TGA curve of PS 800 equivalents generated by <b>6</b> /[Ph <sub>3</sub> C][B(C <sub>6</sub> F <sub>5</sub> ) <sub>4</sub> ] from <b>Table 4</b> , entry 4 (30 min).             | <b>S171</b> |
| <b>Fig. S256</b> TGA curve of PS 800 equivalents generated by <b>6</b> /[Ph <sub>3</sub> C][B(C <sub>6</sub> F <sub>5</sub> ) <sub>4</sub> ] from <b>Table 4</b> , entry 5 (24 h).               | <b>S171</b> |
| <b>Fig. S257</b> TGA curve of PVL 300 equivalents generated by <b>6</b> /[Ph <sub>3</sub> C][B(C <sub>6</sub> F <sub>5</sub> ) <sub>4</sub> ] from <b>Table 4</b> , entry 6 (10 min).            | <b>S172</b> |
| <b>Fig. S258</b> TGA curve of PDL 300 equivalents generated by <b>6</b> /[Ph <sub>3</sub> C][B(C <sub>6</sub> F <sub>5</sub> ) <sub>4</sub> ] from <b>Table 4</b> , entry 7 (6 h).               | <b>S172</b> |
| <b>Fig. S259</b> TGA curve of PIP- <i>b</i> -PVL 800:300 equivalents generated by <b>6</b> /[Ph <sub>3</sub> C][B(C <sub>6</sub> F <sub>5</sub> ) <sub>4</sub> ] from <b>Table 5</b> , entry 1.  | <b>S173</b> |
| <b>Fig. S260</b> TGA curve of PIP- <i>b</i> -PDL 800:300 equivalents generated by <b>6</b> /[Ph <sub>3</sub> C][B(C <sub>6</sub> F <sub>5</sub> ) <sub>4</sub> ] from <b>Table 5</b> , entry 2.  | <b>S173</b> |
| <b>Fig. S261</b> TGA curve of PMyr- <i>b</i> -PCL 800:300 equivalents generated by <b>6</b> /[Ph <sub>3</sub> C][B(C <sub>6</sub> F <sub>5</sub> ) <sub>4</sub> ] from <b>Table 5</b> , entry 3. | <b>S174</b> |
| <b>Fig. S262</b> DSC curve of PMyr- <i>b</i> -PVL 800:300 equivalents generated by <b>6</b> /[Ph <sub>3</sub> C][B(C <sub>6</sub> F <sub>5</sub> ) <sub>4</sub> ] from <b>Table 5</b> , entry 4. | <b>S174</b> |
| <b>Fig. S263</b> TGA curve of PMyr- <i>b</i> -PDL 800:300 equivalents generated by <b>6</b> /[Ph <sub>3</sub> C][B(C <sub>6</sub> F <sub>5</sub> ) <sub>4</sub> ] from <b>Table 5</b> , entry 5. | <b>S175</b> |
| <b>Fig. S264</b> TGA curve of PMyr 800 equivalents generated by <b>8</b> /[Ph <sub>3</sub> C][B(C <sub>6</sub> F <sub>5</sub> ) <sub>4</sub> ] from <b>Table S1</b> , entry 1 (30 min).          | <b>S175</b> |
| <b>Fig. S265</b> TGA curve of PS 800 equivalents generated by <b>8</b> /[Ph <sub>3</sub> C][B(C <sub>6</sub> F <sub>5</sub> ) <sub>4</sub> ] from <b>Table S1</b> , entry 2 (30 min).            | <b>S176</b> |
| <b>Fig. S266</b> TGA curve of PVL 300 equivalents generated by <b>8</b> /[Ph <sub>3</sub> C][B(C <sub>6</sub> F <sub>5</sub> ) <sub>4</sub> ] from <b>Table S1</b> , entry 3 (10 min).           | <b>S176</b> |
| <b>Fig. S267</b> TGA curve of PDL 300 equivalents generated by <b>8</b> /[Ph <sub>3</sub> C][B(C <sub>6</sub> F <sub>5</sub> ) <sub>4</sub> ] from <b>Table S1</b> , entry 4 (6 h).              | <b>S177</b> |
| <b>Fig. S268</b> TGA curve of PIP 300 equivalents generated by <b>6</b> /[Ph <sub>3</sub> C][B(C <sub>6</sub> F <sub>5</sub> ) <sub>4</sub> ] from <b>Table S2</b> , entry 1a (12 h).            | <b>S177</b> |
| <b>Fig. S269</b> TGA curve of PIP 300 equivalents generated by <b>6</b> /[Ph <sub>3</sub> C][B(C <sub>6</sub> F <sub>5</sub> ) <sub>4</sub> ] from <b>Table S2</b> , entry 1b (12 h).            | <b>S178</b> |
| <b>Fig. S270</b> TGA curve of PIP 300 equivalents generated by <b>6</b> /[Ph <sub>3</sub> C][B(C <sub>6</sub> F <sub>5</sub> ) <sub>4</sub> ] from <b>Table S2</b> , entry 1c (12 h).            | <b>S178</b> |
| <b>Fig. S271</b> TGA curve of PIP 550 equivalents generated by <b>6</b> /[Ph <sub>3</sub> C][B(C <sub>6</sub> F <sub>5</sub> ) <sub>4</sub> ] from <b>Table S2</b> , entry 2a (12 h).            | <b>S179</b> |
| <b>Fig. S272</b> TGA curve of PIP 550 equivalents generated by <b>6</b> /[Ph <sub>3</sub> C][B(C <sub>6</sub> F <sub>5</sub> ) <sub>4</sub> ] from <b>Table S2</b> , entry 2b (12 h).            | <b>S179</b> |
| <b>Fig. S273</b> TGA curve of PIP 550 equivalents generated by <b>6</b> /[Ph <sub>3</sub> C][B(C <sub>6</sub> F <sub>5</sub> ) <sub>4</sub> ] from <b>Table S2</b> , entry 2c (12 h).            | <b>S180</b> |
| <b>Fig. S274</b> TGA curve of PCL 550 equivalents generated by <b>6</b> /[Ph <sub>3</sub> C][B(C <sub>6</sub> F <sub>5</sub> ) <sub>4</sub> ] from <b>Table S2</b> , entry 3a (2 h).             | <b>S180</b> |
| <b>Fig. S275</b> TGA curve of PCL 550 equivalents generated by <b>6</b> /[Ph <sub>3</sub> C][B(C <sub>6</sub> F <sub>5</sub> ) <sub>4</sub> ] from <b>Table S2</b> , entry 3b(2 h).              | <b>S181</b> |
| <b>Fig. S276</b> TGA curve of PCL 550 equivalents generated by <b>6</b> /[Ph <sub>3</sub> C][B(C <sub>6</sub> F <sub>5</sub> ) <sub>4</sub> ] from <b>Table S2</b> , entry 3c (2 h).             | <b>S181</b> |
| <b>Fig. S277</b> TGA curve of PCL 800 equivalents generated by <b>6</b> /[Ph <sub>3</sub> C][B(C <sub>6</sub> F <sub>5</sub> ) <sub>4</sub> ] from <b>Table S2</b> , entry 4a (2 h).             | <b>S182</b> |

|                                                                                                                                                                                                                       |             |
|-----------------------------------------------------------------------------------------------------------------------------------------------------------------------------------------------------------------------|-------------|
| <b>Fig. S278</b> TGA curve of PCL 800 equivalents generated by <b>6</b> /[Ph <sub>3</sub> C][B(C <sub>6</sub> F <sub>5</sub> ) <sub>4</sub> ] from <b>Table S2</b> , entry 4b (2 h).                                  | <b>S182</b> |
| <b>Fig. S279</b> TGA curve of PCL 800 equivalents generated by <b>6</b> /[Ph <sub>3</sub> C][B(C <sub>6</sub> F <sub>5</sub> ) <sub>4</sub> ] from <b>Table S2</b> , entry 4c (2 h).                                  | <b>S183</b> |
| <b>Fig. S280</b> TGA curve of PCL 300 equivalents generated by <b>6</b> from <b>Table S2</b> , entry 5 (No [Ph <sub>3</sub> C][B(C <sub>6</sub> F <sub>5</sub> ) <sub>4</sub> ] added) (10 min).                      | <b>S183</b> |
| <b>Fig. S281</b> TGA curve of PIP 50 equivalents generated by <b>6</b> /[Ph <sub>3</sub> C][B(C <sub>6</sub> F <sub>5</sub> ) <sub>4</sub> ] from <b>Table S3</b> , entry 1 in CDCl <sub>3</sub> at 298 K (12 h).     | <b>S184</b> |
| <b>Fig. S282</b> TGA curve of PIP- <i>b</i> -PCL 50:50 equivalents generated by <b>6</b> /[Ph <sub>3</sub> C][B(C <sub>6</sub> F <sub>5</sub> ) <sub>4</sub> ] from <b>Table S3</b> , entry 2.                        | <b>S184</b> |
| <b>Fig. S283</b> TGA curve of recovered PIP 50 equivalents after hydrolysis of PIP- <i>b</i> -PCL 50:50 from <b>Table S3</b> , entry 3 (12 h).                                                                        | <b>S185</b> |
| <b>Fig. S284</b> TGA curve of PIP- <i>b</i> -PCL 50:50 equivalents generated by <b>Y</b> [N(SiMe <sub>3</sub> ) <sub>2</sub> ] <sub>3</sub> from <b>Table S3</b> , entry 4 (6 h).                                     | <b>S185</b> |
| <b>7.0 Differential Scanning Calorimetry (DSC) Characterization of Isolated Polymers</b>                                                                                                                              | <b>S186</b> |
| <b>Fig. S285</b> DSC curve of PIP generated by <b>6</b> /[Ph <sub>3</sub> C][B(C <sub>6</sub> F <sub>5</sub> ) <sub>4</sub> ] from <b>Table 1</b> , entry 1 (12 h).                                                   | <b>S186</b> |
| <b>Fig. S286</b> DSC curve of PIP 800 equivalents generated by <b>8</b> /[Ph <sub>3</sub> C][B(C <sub>6</sub> F <sub>5</sub> ) <sub>4</sub> ] from <b>Table 1</b> , entry 3 (12 h).                                   | <b>S186</b> |
| <b>Fig. S287</b> DSC curve of PIP 800 equivalents generated by <b>6</b> /[Ph <sub>3</sub> C][B(C <sub>6</sub> F <sub>5</sub> ) <sub>4</sub> ] from <b>Table 1</b> , entry 4 (24 h).                                   | <b>S187</b> |
| <b>Fig. S288</b> DSC curve of PIP 800 equivalents generated by <b>6</b> /[Ph <sub>3</sub> C][B(C <sub>6</sub> F <sub>5</sub> ) <sub>4</sub> ] from <b>Table 1</b> , entry 5 (30 min).                                 | <b>S187</b> |
| <b>Fig. S289</b> DSC curve of PIP 800 equivalents generated by <b>8</b> /[Ph <sub>3</sub> C][B(C <sub>6</sub> F <sub>5</sub> ) <sub>4</sub> ] from <b>Table 1</b> , entry 6 (30 min).                                 | <b>S188</b> |
| <b>Fig. S290</b> DSC curve of PCL 300 equivalents generated by <b>6</b> /[Ph <sub>3</sub> C][B(C <sub>6</sub> F <sub>5</sub> ) <sub>4</sub> ] from <b>Table 1</b> , entry 7 (10 min).                                 | <b>S188</b> |
| <b>Fig. S291</b> DSC curve of PCL 300 equivalents generated by <b>8</b> /[Ph <sub>3</sub> C][B(C <sub>6</sub> F <sub>5</sub> ) <sub>4</sub> ] from <b>Table 1</b> , entry 8 (10 min).                                 | <b>S189</b> |
| <b>Fig. S292</b> DSC curve of PCL 300 equivalents generated by <b>6</b> /[Ph <sub>3</sub> C][B(C <sub>6</sub> F <sub>5</sub> ) <sub>4</sub> ] from <b>Table 1</b> , entry 9 (2 h).                                    | <b>S189</b> |
| <b>Fig. S293</b> DSC curve of PIP- <i>b</i> -PCL 800:300 equivalents generated by <b>6</b> /[Ph <sub>3</sub> C][B(C <sub>6</sub> F <sub>5</sub> ) <sub>4</sub> ] from <b>Table 2</b> , entry 1.                       | <b>S190</b> |
| <b>Fig. S294</b> DSC curve of PIP- <i>b</i> -PCL 550:550 equivalents generated by <b>6</b> /[Ph <sub>3</sub> C][B(C <sub>6</sub> F <sub>5</sub> ) <sub>4</sub> ] from <b>Table 2</b> , entry 2.                       | <b>S190</b> |
| <b>Fig. S295</b> DSC curve of PIP- <i>b</i> -PCL 300:800 equivalents generated by <b>6</b> /[Ph <sub>3</sub> C][B(C <sub>6</sub> F <sub>5</sub> ) <sub>4</sub> ] from <b>Table 2</b> , entry 3.                       | <b>S191</b> |
| <b>Fig. S296</b> DSC curve of PIP 800 equivalents generated by <b>6</b> /[Ph <sub>3</sub> C][B(C <sub>6</sub> F <sub>5</sub> ) <sub>4</sub> ] from <b>Table 3</b> , entry 1 (IP addition time 0 min).                 | <b>S191</b> |
| <b>Fig. S297</b> DSC curve of PIP 800 equivalents generated by <b>6</b> /[Ph <sub>3</sub> C][B(C <sub>6</sub> F <sub>5</sub> ) <sub>4</sub> ] from <b>Table 3</b> , entry 2 (IP addition time 30 min).                | <b>S192</b> |
| <b>Fig. S298</b> DSC curve of PIP- <i>b</i> -PCL 800:300 equivalents generated by <b>6</b> and 0.5 equivalents of [Ph <sub>3</sub> C][B(C <sub>6</sub> F <sub>5</sub> ) <sub>4</sub> ] from <b>Table 3</b> , entry 3. | <b>S192</b> |
| <b>Fig. S299</b> DSC curve of PIP- <i>b</i> -PCL 800:300 equivalents generated by <b>6</b> and 1.5 equivalents of [Ph <sub>3</sub> C][B(C <sub>6</sub> F <sub>5</sub> ) <sub>4</sub> ] from <b>Table 3</b> , entry 4. | <b>S193</b> |

|                                                                                                                                                                                                  |             |
|--------------------------------------------------------------------------------------------------------------------------------------------------------------------------------------------------|-------------|
| <b>Fig. S300</b> DSC curve of PMyr 800 equivalents generated by <b>6</b> /[Ph <sub>3</sub> C][B(C <sub>6</sub> F <sub>5</sub> ) <sub>4</sub> ] from <b>Table 4</b> , entry 1 (30 min).           | <b>S193</b> |
| <b>Fig. S301</b> DSC curve of PMyr 800 equivalents generated by <b>6</b> /[Ph <sub>3</sub> C][B(C <sub>6</sub> F <sub>5</sub> ) <sub>4</sub> ] from <b>Table 4</b> , entry 2 (90 min).           | <b>S194</b> |
| <b>Fig. S302</b> DSC curve of PMyr 800 equivalents generated by <b>6</b> /[Ph <sub>3</sub> C][B(C <sub>6</sub> F <sub>5</sub> ) <sub>4</sub> ] from <b>Table 4</b> , entry 3 (3 h).              | <b>S194</b> |
| <b>Fig. S303</b> DSC curve of PS 800 equivalents generated by <b>6</b> /[Ph <sub>3</sub> C][B(C <sub>6</sub> F <sub>5</sub> ) <sub>4</sub> ] from <b>Table 4</b> , entry 4 (30 min).             | <b>S195</b> |
| <b>Fig. S304</b> DSC curve of PS 800 equivalents generated by <b>6</b> /[Ph <sub>3</sub> C][B(C <sub>6</sub> F <sub>5</sub> ) <sub>4</sub> ] from <b>Table 4</b> , entry 5 (20 h).               | <b>S195</b> |
| <b>Fig. S305</b> DSC curve of PVL 300 equivalents generated by <b>6</b> /[Ph <sub>3</sub> C][B(C <sub>6</sub> F <sub>5</sub> ) <sub>4</sub> ] from <b>Table 4</b> , entry 6 (10 min).            | <b>S196</b> |
| <b>Fig. S306</b> DSC curve of PDL 300 equivalents generated by <b>6</b> /[Ph <sub>3</sub> C][B(C <sub>6</sub> F <sub>5</sub> ) <sub>4</sub> ] from <b>Table 4</b> , entry 7 (6 h).               | <b>S196</b> |
| <b>Fig. S307</b> DSC curve of PIP- <i>b</i> -PVL 800:300 equivalents generated by <b>6</b> /[Ph <sub>3</sub> C][B(C <sub>6</sub> F <sub>5</sub> ) <sub>4</sub> ] from <b>Table 5</b> , entry 1.  | <b>S197</b> |
| <b>Fig. S308</b> DSC curve of PIP- <i>b</i> -PDL 800:300 equivalents generated by <b>6</b> /[Ph <sub>3</sub> C][B(C <sub>6</sub> F <sub>5</sub> ) <sub>4</sub> ] from <b>Table 5</b> , entry 2.  | <b>S197</b> |
| <b>Fig. S309</b> DSC curve of PMyr- <i>b</i> -PCL 800:300 equivalents generated by <b>6</b> /[Ph <sub>3</sub> C][B(C <sub>6</sub> F <sub>5</sub> ) <sub>4</sub> ] from <b>Table 5</b> , entry 3. | <b>S198</b> |
| <b>Fig. S310</b> DSC curve of PMyr- <i>b</i> -PVL 800:300 equivalents generated by <b>6</b> /[Ph <sub>3</sub> C][B(C <sub>6</sub> F <sub>5</sub> ) <sub>4</sub> ] from <b>Table 5</b> , entry 4. | <b>S198</b> |
| <b>Fig. S311</b> DSC curve of PMyr- <i>b</i> -PDL 800:300 equivalents generated by <b>6</b> /[Ph <sub>3</sub> C][B(C <sub>6</sub> F <sub>5</sub> ) <sub>4</sub> ] from <b>Table 5</b> , entry 5. | <b>S199</b> |
| <b>Fig. S312</b> DSC curve of PMyr 800 equivalents generated by <b>8</b> /[Ph <sub>3</sub> C][B(C <sub>6</sub> F <sub>5</sub> ) <sub>4</sub> ] from <b>Table S1</b> , entry 1 (30 min).          | <b>S199</b> |
| <b>Fig. S313</b> DSC curve of PS 800 equivalents generated by <b>8</b> /[Ph <sub>3</sub> C][B(C <sub>6</sub> F <sub>5</sub> ) <sub>4</sub> ] from <b>Table S1</b> , entry 2 (30 min).            | <b>S200</b> |
| <b>Fig. S314</b> DSC curve of PVL 300 equivalents generated by <b>8</b> /[Ph <sub>3</sub> C][B(C <sub>6</sub> F <sub>5</sub> ) <sub>4</sub> ] from <b>Table S1</b> , entry 3 (10 min).           | <b>S200</b> |
| <b>Fig. S315</b> DSC curve of PDL 300 equivalents generated by <b>8</b> /[Ph <sub>3</sub> C][B(C <sub>6</sub> F <sub>5</sub> ) <sub>4</sub> ] from <b>Table S1</b> , entry 4 (6 h).              | <b>S201</b> |
| <b>Fig. S316</b> DSC curve of PIP 300 equivalents generated by <b>6</b> /[Ph <sub>3</sub> C][B(C <sub>6</sub> F <sub>5</sub> ) <sub>4</sub> ] from <b>Table S2</b> , entry 1 (12 h).             | <b>S201</b> |
| <b>Fig. S317</b> DSC curve of PIP 550 equivalents generated by <b>6</b> /[Ph <sub>3</sub> C][B(C <sub>6</sub> F <sub>5</sub> ) <sub>4</sub> ] from <b>Table S2</b> , entry 2 (12 h).             | <b>S202</b> |
| <b>Fig. S318</b> DSC curve of PCL 550 equivalents generated by <b>6</b> /[Ph <sub>3</sub> C][B(C <sub>6</sub> F <sub>5</sub> ) <sub>4</sub> ] from <b>Table S2</b> , entry 3 (2 h).              | <b>S202</b> |
| <b>Fig. S319</b> DSC curve of PCL 800 equivalents generated by <b>6</b> /[Ph <sub>3</sub> C][B(C <sub>6</sub> F <sub>5</sub> ) <sub>4</sub> ] from <b>Table S2</b> , entry 4 (2 h).              | <b>S203</b> |
| <b>Fig. S320</b> DSC curve of PCL 300 equivalents generated by <b>6</b> from <b>Table S2</b> , entry 5 (No [Ph <sub>3</sub> C][B(C <sub>6</sub> F <sub>5</sub> ) <sub>4</sub> ] added) (10 min). | <b>S203</b> |
| <b>Fig. S321</b> DSC curve of PIP- <i>b</i> -PCL 50:50 equivalents generated by <b>6</b> /[Ph <sub>3</sub> C][B(C <sub>6</sub> F <sub>5</sub> ) <sub>4</sub> ] from <b>Table S3</b> , entry 2.   | <b>S204</b> |
| <b>Fig. S322</b> DSC curve of PIP- <i>b</i> -PCL 50:50 equivalents generated by <b>Y</b> [N(SiMe <sub>3</sub> ) <sub>2</sub> ] <sub>3</sub> from <b>Table S3</b> , entry (6 h).                  | <b>S204</b> |

## 1. General Considerations

All reactions involving air and moisture sensitive compounds were carried out using Schlenk line techniques or in a Vacuum Atmospheres OMNI-LAB glovebox under an oxygen free, N<sub>2</sub> atmosphere. Solvents used in air free reactions (toluene, hexanes, pentane, and tetrahydrofuran) were purchased from Fisher, sparged under ultrahigh purity (UHP) grade argon and passed through two columns of drying agent in a JCMeyer solvent purification system and dispensed directly into the glovebox. All other solvents were used without further purification. Deuterated NMR solvents, C<sub>6</sub>D<sub>6</sub>, CDCl<sub>3</sub>, and toluene-d<sub>8</sub> were purchased from Cambridge Isotope Laboratories and were used as received. Toluene-d<sub>8</sub> and C<sub>6</sub>D<sub>6</sub> suitable for air sensitive compounds were dried by stirring over Na/benzophenone for two days, followed by three freeze-pump-thaw cycles and vacuum transferred into a flame-dried Straus flask and stored in a glovebox under a N<sub>2</sub> atmosphere. Complexes {MeC(2,6-*i*Pr)<sub>2</sub>C<sub>6</sub>H<sub>3</sub>NH}CHC(Me[N(2-OMeC<sub>6</sub>H<sub>4</sub>)])Y(CH<sub>2</sub>SiMe<sub>3</sub>)<sub>2</sub> (**6**),<sup>1</sup> {CH(CHC(Me[N(2-OMeC<sub>6</sub>H<sub>4</sub>)])Y(CH<sub>2</sub>SiMe<sub>3</sub>)<sub>2</sub>) (**7**)<sup>2</sup>, and {CH<sub>3</sub>C(2,6-*i*Pr)<sub>2</sub>C<sub>6</sub>H<sub>3</sub>NH}CHC(CH<sub>3</sub>)(NCH<sub>2</sub>-NMe<sub>2</sub>)Y(CH<sub>2</sub>SiMe<sub>3</sub>)<sub>2</sub> (**8**)<sup>3</sup> and Y[N(SiMe<sub>3</sub>)<sub>2</sub>]<sub>3</sub><sup>4</sup> were synthesized following literature procedure. Isoprene, purchased from Sigma-Aldrich, was dried over 4Å molecular sieves for 7 days, followed by three freeze-pump-thaw cycles and a vacuum transfer into a flame-dried Straus flask and stored in a glovebox at -35 °C under a N<sub>2</sub> atmosphere. ε-Caprolactone, ε-decalactone, δ-valerolactone, and β-myrcene were purchased from Sigma-Aldrich and were dried over CaH<sub>2</sub> for 3 days followed by three freeze-pump-thaw cycles and a vacuum transfer to a flame-dried Straus flask and stored in a glovebox at -35 °C under a N<sub>2</sub> atmosphere. All other reagents and chemicals were obtained from commercial vendors (Sigma-Aldrich, TCI, Alfa Aesar, and VWR) and were used without further purification.

### 1.1 Polymerization Methods

#### *General procedure for the homopolymerization of 1,3-dienes or cyclic esters*

In a glovebox, catalyst **6-8** (10 μmol, 200 μL of a 0.5 M stock solution) was placed in a stir bar charged 20 mL vial and diluted in toluene (7 mL). Trityl (tetrakis(pentafluorophenyl)borate [Ph<sub>3</sub>C][B(C<sub>6</sub>F<sub>5</sub>)<sub>4</sub>] (10 μmol, 1 mL of a 0.01 M stock solution) was added to the vial and the mixture was stirred for 10 min. Olefin (300-800 equiv.) was added by micro syringe in one portion, and the polymerization was carried out for the designated time with constant stirring during which the reaction turned from orange to gold. The reaction mixture was poured into a large quantity of ethanol (100 mL) to give colorless copolymer that was dried in a vacuum oven at 40 °C for 12 h to a constant weight (0.90 g, 100%).

#### *General procedure for the block copolymerization of 1,3-dienes and cyclic esters*

In a glovebox, catalyst **6-8** (10 μmol, 200 μL of a 0.5 M stock solution) was placed in a stir bar charged 20 mL vial and diluted in toluene (7 mL). Trityl (tetrakis(pentafluorophenyl)borate [Ph<sub>3</sub>C][B(C<sub>6</sub>F<sub>5</sub>)<sub>4</sub>] (10 μmol, 1 mL of a 0.01 M stock solution) was added to the vial and reaction was stirred for 10 min. Olefin (300-800 equiv.) was added by micro syringe in one portion, and the polymerization was carried out for the designated time with constant stirring during which the reaction turned from orange to gold. Then cyclic ester (300-800 equiv.) was added by micro syringe to the above system and polymerization was continued for the designated time. The gel like reaction mixture was poured into a large quantity of ethanol (100 mL) to give colorless copolymer that was dried in a vacuum oven at 40 °C for 12 h to a constant weight (0.90 g, 100%).

*Note:* All conditions that deviate from this general procedure are clearly indicated in each table.

## 1.2 Characterization Methods

*NMR Spectroscopy.*  $^1\text{H}$ ,  $^{13}\text{C}$ , and  $^{19}\text{F}$  NMR spectra were recorded using a Varian Mercury 400 MHz, Varian 500 MHz, or Varian 600 MHz spectrometers. Chemical shifts are referenced to residual protons in the deuterated solvent or the deuterated solvent itself for  $^1\text{H}$  (7.26 ppm for  $\text{CDCl}_3$ , 2.08 for toluene- $\text{d}_8$ ) or  $^{13}\text{C}$  (77.16 ppm for  $\text{CDCl}_3$ ) NMR spectra. All NMR spectra were recorded at room temperature in specified deuterated solvents. Representative peak assignments shown for each homopolymer, isoprene,<sup>5,6</sup>  $\beta$ -myrcene,<sup>7</sup> Styrene,<sup>8</sup>  $\epsilon$ -caprolactone,<sup>8</sup>  $\delta$ -valerolactone,<sup>9</sup> and  $\epsilon$ -decalactone.<sup>10</sup>

*Fourier Transform Infrared Spectroscopy (FT-IR).* FT-IR spectra were recorded using an Agilent Cary 630 FT-IR equipped with a Diamond ATR sampling accessory. Accompanying MicroLab FT-IR software was used to acquire 72 scans at  $4\text{ cm}^{-1}$  resolution with a spectral range of  $400\text{--}4000\text{ cm}^{-1}$ .

*Gel Permeation Chromatography (GPC).* GPC analyses were conducted using an Agilent 1260 Infinity II GPC System equipped with a Wyatt DAWN HELEOS-II and a Wyatt Optilab T-rEX as well as an Agilent 1260 Infinity autosampler and UV-detector. The GPC system was equipped with an Agilent PolyPore column (5 micron, 4.6 mmID) which was calibrated using monodisperse polystyrene standards, eluted with THF at  $30\text{ }^\circ\text{C}$  at  $0.3\text{ mL/min}$ . The number average molar mass and dispersity values were determined from multi-angle light scattering (MALS) using  $dn/dc$  values calculated by 100 % mass recovery method from the refractive index (RI) signal.

*Thermal Gravimetric Analysis (TGA).* All TGA traces were recorded using Mettler-Toledo STARE System TGA/DSC 3+ equipped with STARE software, a TA SDTA Sensor LF, XP1 Balance, and a sample robot except for four samples (**S239-S242**). Data from these four samples were collected on a TGA Q50 instrument. Sample weight of purified polymer was between 5-15 mg was sealed in  $40\text{ }\mu\text{L}$  aluminum crucible fitted with a pierceable lid. General method involves heating from  $25\text{ }^\circ\text{C}$  to  $500\text{ }^\circ\text{C}$  at a scan rate of  $10\text{ }^\circ\text{C/min}$  under a constant flow of  $\text{N}_2$  ( $15\text{ mL/min}$ ).

*Differential Scanning Calorimetry (DSC).* DSC traces were recorded using a Perkin-Elmer DSC 8000 and processed with Pyris software. Sample weight of purified polymer was between 7-30 mg measured out on a microbalance and sealed in standard Perkin-Elmer Aluminum Pans. Data was collected at a consistent scan rate of  $10\text{ }^\circ\text{C/min}$  under a  $\text{N}_2$  flow of  $20\text{ mL/min}$ . General collection method involved 1) 5 min isothermal step at  $-80\text{ }^\circ\text{C}$ , 2) heating step from  $-80\text{ }^\circ\text{C}$  to  $100\text{ }^\circ\text{C}$ , 3) 5 min isothermal step, 4) cooling step from  $100\text{ }^\circ\text{C}$  to  $-80\text{ }^\circ\text{C}$ . These 4 steps were repeated through two additional heating and cooling cycles. All  $T_g$  and  $T_m$  values reported are from the 3<sup>rd</sup> heating scan. Any deviations from this method involved a temperature range shift.

### 1.3 Impurity in $[\text{Ph}_3\text{C}][\text{B}(\text{C}_6\text{F}_5)_4]$

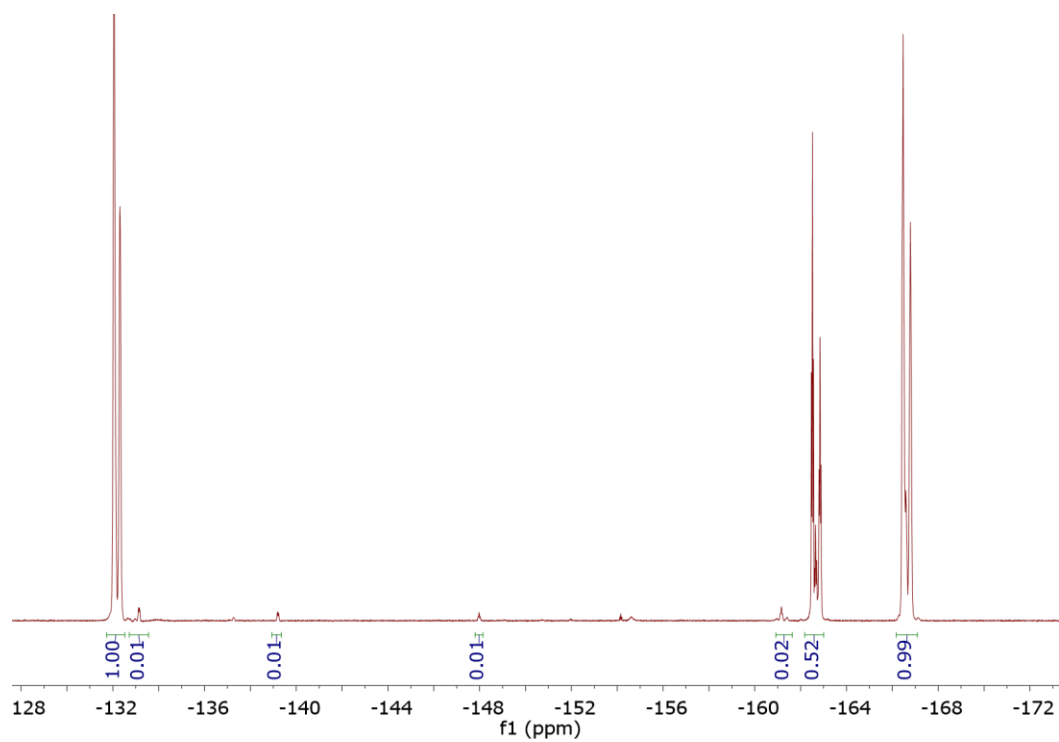

**Fig. S1.**  $^{19}\text{F}$  NMR spectrum of  $[\text{Ph}_3\text{C}][\text{B}(\text{C}_6\text{F}_5)_4]$  in  $\text{C}_6\text{D}_6$  at 298 K.

## 1.4 Homopolymerization of 1,3-dienes and cyclic esters with **8**/[Ph<sub>3</sub>C][B(C<sub>6</sub>F<sub>5</sub>)<sub>4</sub>].

**Table S1.** Homopolymerization of a range of 1,3-dienes and cyclic esters with pre-catalyst **8**.<sup>a</sup>

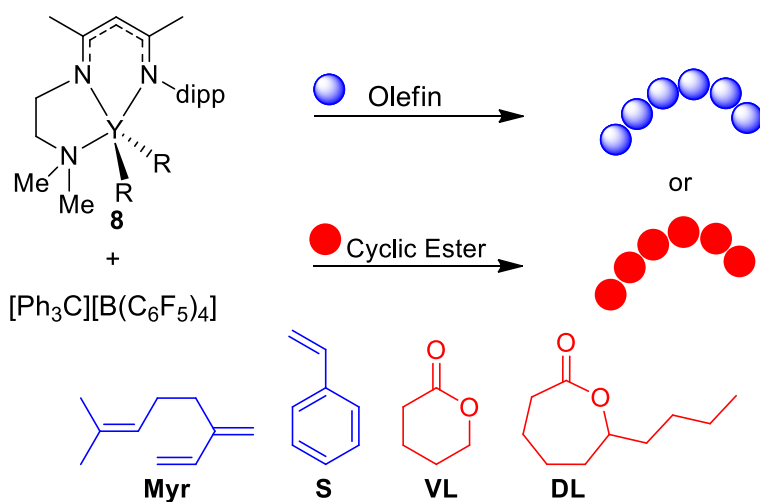

| Entry | Monomer | Time   | Temp. (°C) | Conv. (%) <sup>b</sup> | M <sub>n</sub> (kDa) <sup>c</sup> | Đ <sup>c</sup> | Microstructure <sup>d</sup><br><i>Cis</i> -1,4/ <i>Trans</i> -1,4/3,4 | T <sub>g</sub> (°C) <sup>e</sup> | T <sub>m</sub> (°C) <sup>e</sup> |
|-------|---------|--------|------------|------------------------|-----------------------------------|----------------|-----------------------------------------------------------------------|----------------------------------|----------------------------------|
| 1     | Myr     | 30 min | rt         | 19                     | 12                                | 1.14           | 4/93/3                                                                | -65                              | —                                |
| 2     | S       | 30 min | rt         | 13                     | 4.9                               | 2.03           | —                                                                     | 87                               | —                                |
| 3     | VL      | 10 min | rt         | 82                     | 26                                | 1.27           | —                                                                     | —                                | 54                               |
| 4     | DL      | 6 h    | 60         | 69                     | 42                                | 1.07           | —                                                                     | -51                              | —                                |

<sup>a</sup>Conditions: **8**, 10 μmol; [Ph<sub>3</sub>C][B(C<sub>6</sub>F<sub>5</sub>)<sub>4</sub>], 10 μmol; toluene, 10 mL; [olefin]/**8** = 800; [cyclic ester]/**8** = 300.

<sup>b</sup>Determined by <sup>1</sup>H NMR spectroscopy of crude reaction mixtures, comparing monomer peaks to polymer.

<sup>c</sup>Determined by gel permeation chromatography (GPC) in THF using a Wyatt DAWN HELEOS II MALS detector. <sup>d</sup>1,4 and 3,4 selectivity determined by <sup>1</sup>H NMR. *Cis*-1,4 and *trans*-1,4 selectivity determined by <sup>13</sup>C NMR. <sup>e</sup>Determined by low temperature differential scanning calorimetry (DSC).



## 1.5 Homopolymerization of different feed ratios of IP and CL with 6/[Ph<sub>3</sub>C][B(C<sub>6</sub>F<sub>5</sub>)<sub>4</sub>].

**Table S2.** Homopolymerization of IP or CL with pre-catalyst **6**.<sup>a</sup>

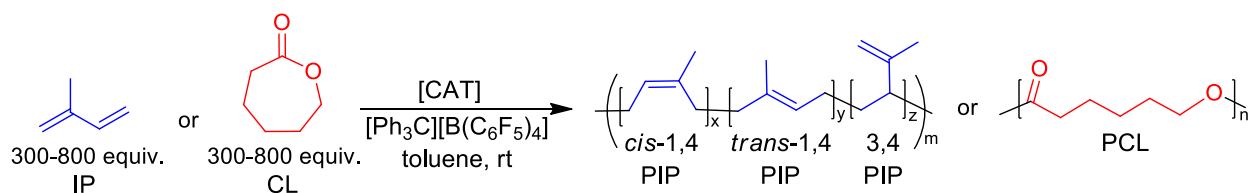

| Entry          | Monomer | Feed Ratio | M <sub>n</sub> (kDa) <sup>b</sup> | Đ <sup>b</sup> | Microstructure <sup>c</sup><br><i>Cis</i> -1,4/ <i>Trans</i> -1,4/3,4 | T <sub>g</sub> (°C) <sup>d</sup> | T <sub>m</sub> (°C) <sup>d</sup> |
|----------------|---------|------------|-----------------------------------|----------------|-----------------------------------------------------------------------|----------------------------------|----------------------------------|
| 1              | IP      | 300        | 50.8(13.1)                        | 1.11(1)        | 19/79/2                                                               | -68                              | —                                |
| 2              | IP      | 550        | 67.4(13.3)                        | 1.05(1)        | 46/52/2                                                               | -65                              | —                                |
| 3              | CL      | 550        | 103(4.71)                         | 1.33(1)        | —                                                                     | —                                | 54                               |
| 4              | CL      | 800        | 112(3.62)                         | 1.36(1)        | —                                                                     | —                                | 58                               |
| 5 <sup>e</sup> | CL      | 300        | 51                                | 1.26           | —                                                                     | —                                | 55                               |

<sup>a</sup>Conditions: **6**, 10 μmol; [Ph<sub>3</sub>C][B(C<sub>6</sub>F<sub>5</sub>)<sub>4</sub>], 10 μmol; toluene, 10 mL; room temperature; IP 12 h; CL 2 h; entries 1-4 are done in triplicate; full conversion was seen in all cases. <sup>b</sup>Determined by gel permeation chromatography (GPC) in THF using a Wyatt DAWN HELEOS II MALS detector. <sup>c</sup>1,4 and 3,4 selectivity determined by <sup>1</sup>H NMR. *Cis*-1,4 and *trans*-1,4 selectivity determined by <sup>13</sup>C NMR. <sup>d</sup>Determined by low temperature differential scanning calorimetry (DSC). <sup>e</sup>No [Ph<sub>3</sub>C][B(C<sub>6</sub>F<sub>5</sub>)<sub>4</sub>] added.

## 1.6 Recycling PIP-*b*-PCL copolymers.

### General procedure for the degradation of PIP-*b*-PCL diblocks

In a 100 mL round bottom flask, charged with a stir bar, PIP-*b*-PCL 50:50 (0.2 g, 55 kDa) was dissolved in THF (~25 mL). A 2 M NaOH aqueous solution (50 mL) was then added, and the reaction flask was fitted with a reflux condenser and heated to 100 °C for 12 h. After cooling, the solution was neutralized with acetic acid. The organic fraction was separated, and the aqueous fraction was washed with THF (25 mL) 3 times. Organic fractions were combined and washed twice with 2 M NaHCO<sub>3</sub> (50 mL) followed by a brine wash (40 mL), dried over MgSO<sub>4</sub>, and filtered. The volatiles were evaporated *in vacuo* to afford a colorless gel. The residue was redissolved in toluene (5 mL) and colorless polymer was crashed out using cooled EtOH. Polymer was dried on a vacuum line at 45 °C for 3 days, then transferred to a high vacuum line for an additional day before being stored at -35 °C in a glovebox (75 mg, 63% mass loss).

### Formation of Alkoxide macroinitiator with recovered IP 50 and Y[N(SiMe<sub>3</sub>)<sub>2</sub>]<sub>3</sub> and repolymerization with CL

NMR scale PIP-*b*-PCL repolymerization was carried out in a J-young tube in toluene-*d*<sub>8</sub>. Initial <sup>1</sup>H NMR of the Y[N(SiMe<sub>3</sub>)<sub>2</sub>]<sub>3</sub> showed a singlet at 0.23 ppm corresponding to yttrium bound N(SiMe<sub>3</sub>)<sub>2</sub> (Fig. S2, bottom). Upon addition of PIP-OH 50 an immediate loss of the 0.23 ppm peak as well as formation of a new downfield HN(SiMe<sub>3</sub>)<sub>2</sub> peak was seen (Fig. S2, top). Subsequent addition of CL lead to immediate appearance of a peak at 3.92 ppm which corresponds to PCL (Fig. S3, middle). Full conversion of PCL was seen after 6 h (Fig. S3, top).

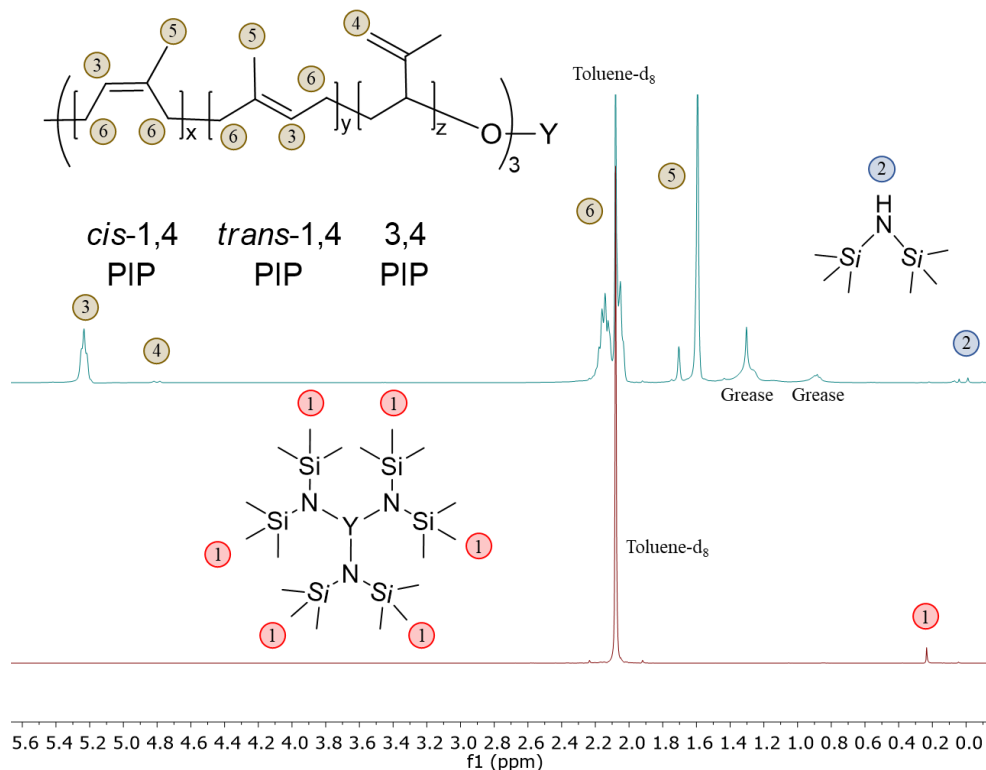

**Fig. S2.** <sup>1</sup>H NMR stack of Y[N(SiMe<sub>3</sub>)<sub>2</sub>]<sub>3</sub> before (bottom) and after recovered IP 50 addition (top) in toluene-*d*<sub>8</sub> at 298 K.

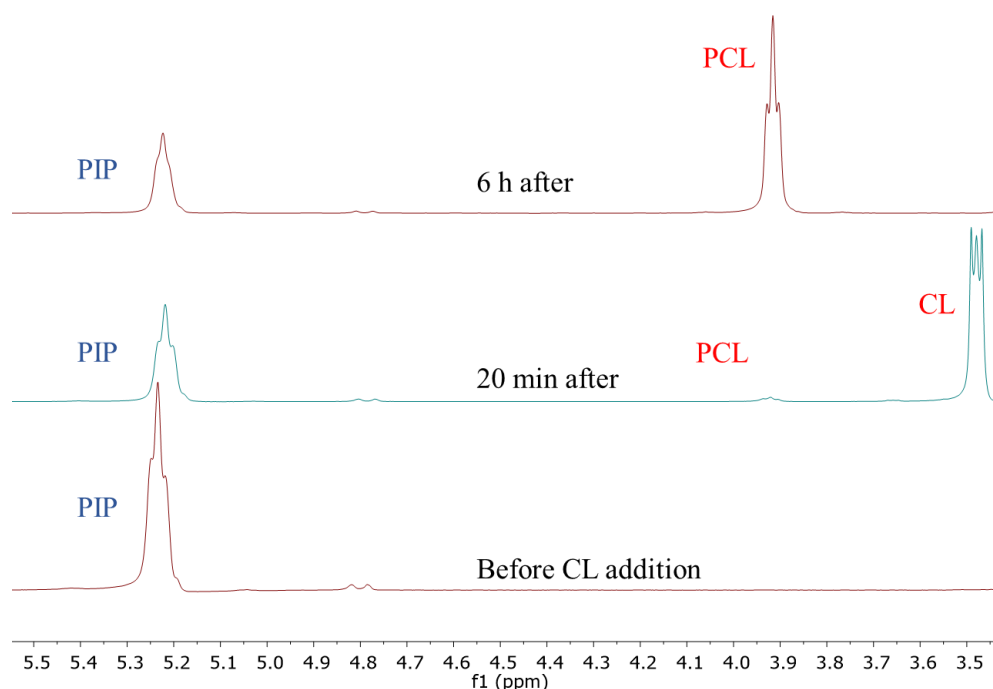

**Fig. S3.**  $^1\text{H}$  NMR stack of PIP-*b*-PCL repolymerization with  $\text{Y}[\text{N}(\text{SiMe}_3)_2]_3$  and PIP 50 in toluene- $\text{d}_8$  at 298 K. After macroinitiator formation (bottom), 20 min after CL addition (middle), and 6 h after CL addition (top).

*General procedure for the repolymerization of PIP-*b*-PCL diblocks*

In a glovebox, yttrium tris[N,N-bis(trimethylsilyl)amide] ( $\text{Y}[\text{N}(\text{SiMe}_3)_2]_3$ ) (1 equiv., 47  $\mu\text{L}$  of a 0.01 M stock solution, 0.47  $\mu\text{mol}$ ) was dissolved in toluene (2 mL) and transferred to a stir bar charged Schlenk flask. PIP-OH (2.5 equiv., 0.05 g, 43 kDa) was dissolved in toluene (5 mL) and slowly added. After stirring for 10 min,  $\epsilon$ -caprolactone (125 equiv., 8  $\mu\text{L}$ , 58  $\mu\text{mol}$ ) was added to the reaction. Reaction was removed from the glovebox and placed on a Schlenk line. The side arm of the Schlenk flask was evacuated and backfilled with dry  $\text{N}_2$  three times and the reaction mixture was heated to 70  $^\circ\text{C}$  for 6 h under  $\text{N}_2$  atmosphere. The colorless reaction mixture was poured into a large quantity of ethanol (50 mL) to quench the polymerization. The collected colorless polymer was dried in a vacuum oven at 40  $^\circ\text{C}$  for 12 h to a constant weight of 0.152 g.

**Table S3.** Polymerization, depolymerization, and repolymerization of PIP-*b*-PCL.<sup>a</sup>

| Entry          | Cat.                                                | Initiator:<br>Activator    | Monomer<br>(M <sub>1</sub> :M <sub>2</sub> ) | Time<br>(h) | Feed Ratio | M <sub>n</sub> (kDa) <sup>e</sup> | Đ <sup>e</sup> | Microstructure <sup>f</sup><br><i>Cis</i> -1,4/ <i>Trans</i> -<br>1,4/3,4 | Eff<br>(%) <sup>g</sup> |
|----------------|-----------------------------------------------------|----------------------------|----------------------------------------------|-------------|------------|-----------------------------------|----------------|---------------------------------------------------------------------------|-------------------------|
| 1              | 6                                                   | Alkyl:<br>Borate           | IP: —                                        | 12          | 50:0       | 42                                | 1.15           | 42/56/2                                                                   | 8                       |
| 2              | 6                                                   | Alkyl:<br>Borate           | IP:CL                                        | 12:2        | 50:50      | 55                                | 1.09           | 45/53/2                                                                   | 17                      |
| 3 <sup>b</sup> | NaOH                                                | —                          | —                                            | 12          | —          | 43                                | 1.15           | 41/58/1                                                                   | —                       |
| 4 <sup>c</sup> | Y[N(SiMe <sub>3</sub> ) <sub>2</sub> ] <sub>3</sub> | Alkoxide<br>(PIP-OH):<br>— | CL                                           | 6           | 0:125      | 56                                | 1.16           | 42/57/1                                                                   | 85                      |
| 5 <sup>d</sup> | 6                                                   | Alkyl:<br>Borate           | IP:CL                                        | 12:2        | 50:50      | 21                                | 1.12           | 34/65/1                                                                   | 43                      |

<sup>a</sup>Conditions: **6**, 10 μmol; [Ph<sub>3</sub>C][B(C<sub>6</sub>F<sub>5</sub>)<sub>4</sub>], 10 μmol; toluene, 10 mL toluene; room temperature; IP 12 h; CL 2 h; full conversion was seen in all cases. <sup>b</sup>NaOH, 2M (50 mL); THF, 25 mL; 100 °C; 12 h; full degradation of PCL was seen. <sup>c</sup>Y[N(SiMe<sub>3</sub>)<sub>2</sub>]<sub>3</sub>, 0.47 μmol; PIP-OH, 43 kDa; toluene, 7 mL; 70 °C, 6 h. <sup>d</sup>Same conditions as entries 1 and 2 except toluene volume decreased to 1 mL. <sup>e</sup>Determined by gel permeation chromatography (GPC) in THF using a Wyatt DAWN HELEOS II MALS detector. <sup>f</sup>1,4 and 3,4 selectivity determined by <sup>1</sup>H NMR. *Cis*-1,4 and *trans*-1,4 selectivity determined by <sup>13</sup>C NMR. <sup>g</sup>Catalyst efficiency, calculated by M<sub>n</sub>(theor.)/M<sub>n</sub>(exp.).

## 2.0 References

- 
- <sup>1</sup> X. Shang, X. Liu, D. Cui, *Polym. Sci. A: Polym. Chem.*, 2007, **45**, 5662–5672.
- <sup>2</sup> X. Liu, X. Shang, T. Tang, N. Hu, F. Pei, D. Cui, X. Chen, X. Jing, *Organometallics*, 2007, **26**, 2747–2757.
- <sup>3</sup> X. Xu, X. Xu, Y. Chen, J. Sun, *Organometallics*, 2008, **27**, 758–763.
- <sup>4</sup> W. A. Herrmann, R. Anwender, F. C. Munck, W. Scherer, V. Dufaud, N. W. Huber, G. R. J. Artus, Z. Naturforsch. 1994, **B49**, 1789.
- <sup>5</sup> H. Sato, Y. Tanaka, *J. Polym. Sci.*, 1979, **17**, 3551-3558.
- <sup>6</sup> Y. Tanaka, H. Sato, T. Seimiya, *Polym. J.*, 1975, **7**, 264-266.
- <sup>7</sup> P. Sahu, A. K. Bhowmick, G. Kali, *Processes*, 2020, **8**, 553.
- <sup>8</sup> A. J. Brandolini, D. D. Hills, In *NMR Spectra of Polymers and Polymer*, Marcel Dekker Inc, New York, 2000.
- <sup>9</sup> S. Chen, H. Wang, Z. Li, F. Wei, H. Zhu, S. Xu, J. Xu, J. Liu, H. Gebru, K. Guo, *Poly. Chem.*, 2018, **9**, 732-742.
- <sup>10</sup> D. Kakde, V. Taresco, K. K. Bansal, E. P. Magennis, S. M. Howdle, G. Mantovani, D. J. Irvine, C. Alexander, *J. Master. Chem. B.*, 2016, **4**, 7119-7129.

### 3.0 Nuclear Magnetic Resonance (NMR) Spectroscopy Characterization of Isolated Polymers

#### 3.1 $^1\text{H}$ NMR Spectroscopy

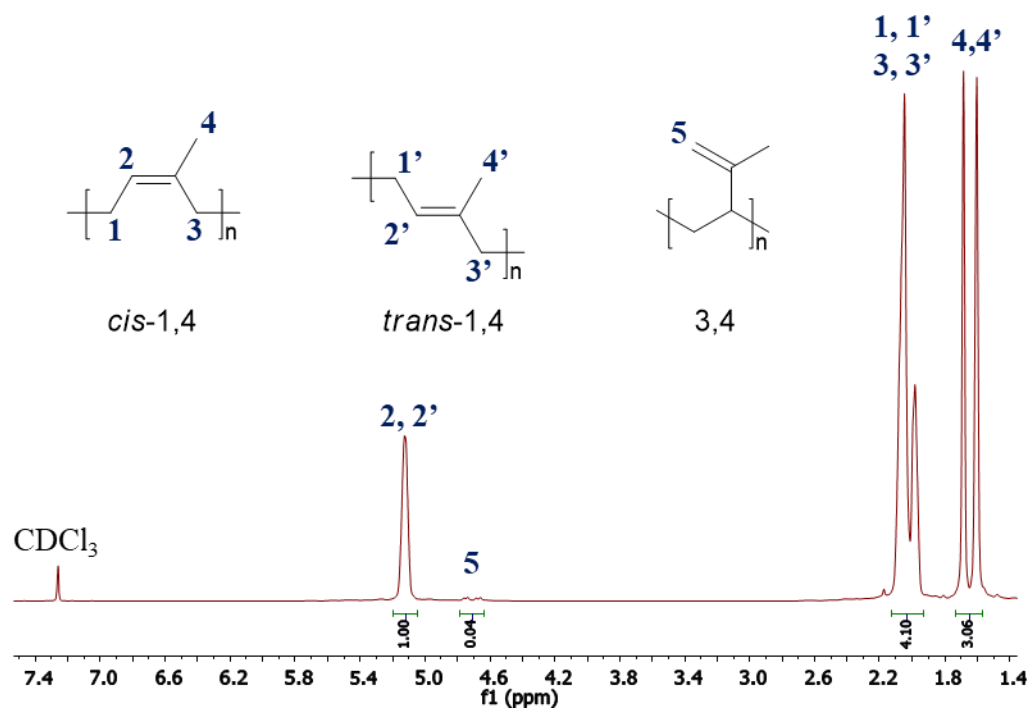

**Fig. S4**  $^1\text{H}$  NMR spectrum of PIP 800 equivalents generated by **6**/[Ph<sub>3</sub>C][B(C<sub>6</sub>F<sub>5</sub>)<sub>4</sub>] from Table 1, entry 1a in CDCl<sub>3</sub> at 298 K (12 h). Representative peak assignment for PIP. Peak 5 used to calculate 3,4 selectivity.

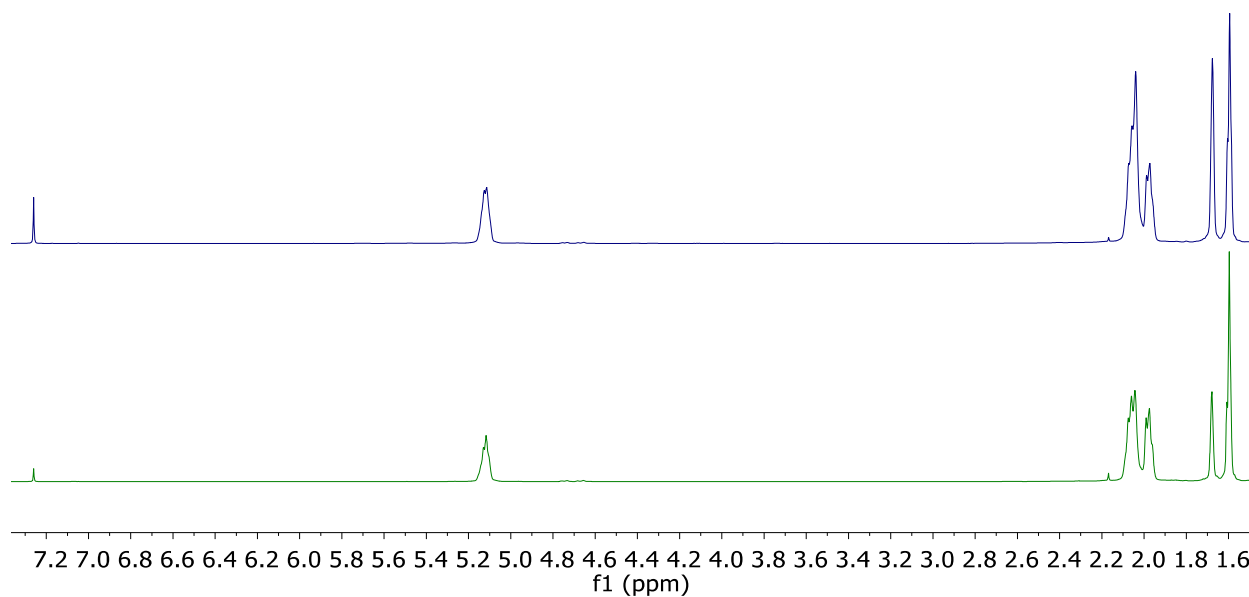

**Fig. S5**  $^1\text{H}$  NMR spectrum of PIP 800 equivalents generated by **6**/[Ph<sub>3</sub>C][B(C<sub>6</sub>F<sub>5</sub>)<sub>4</sub>] from Table 1, entry 1(b and c) in CDCl<sub>3</sub> at 298 K (12 h).

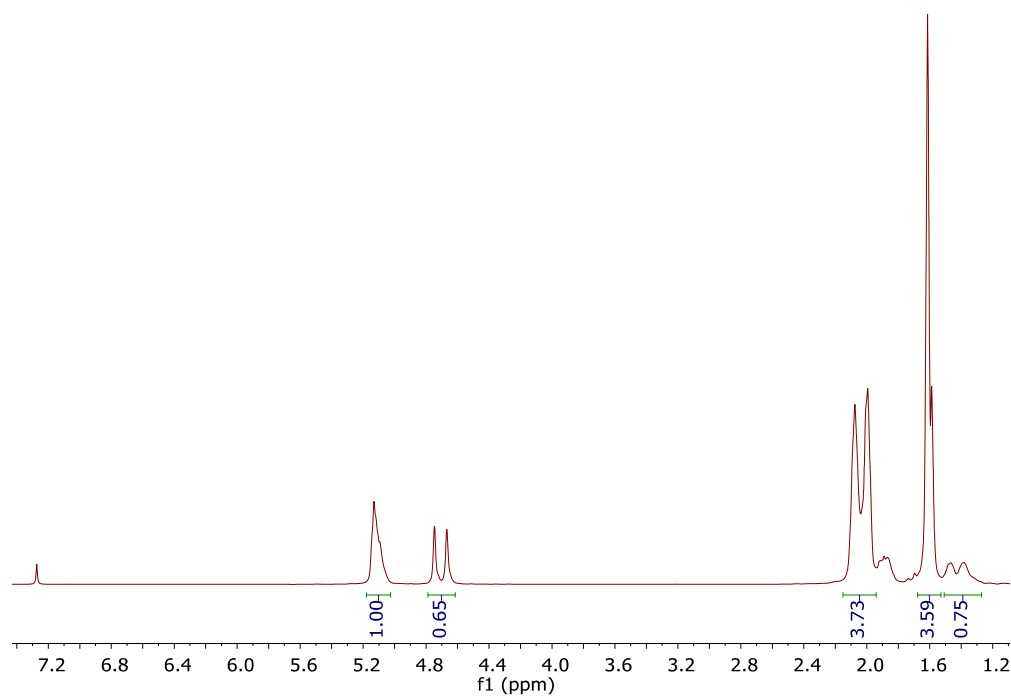

**Fig. S6**  $^1\text{H}$  NMR spectrum of PIP 800 equivalents generated by **8**/[Ph<sub>3</sub>C][B(C<sub>6</sub>F<sub>5</sub>)<sub>4</sub>] from **Table 1**, entry 3 in CDCl<sub>3</sub> at 298 K (12 h).

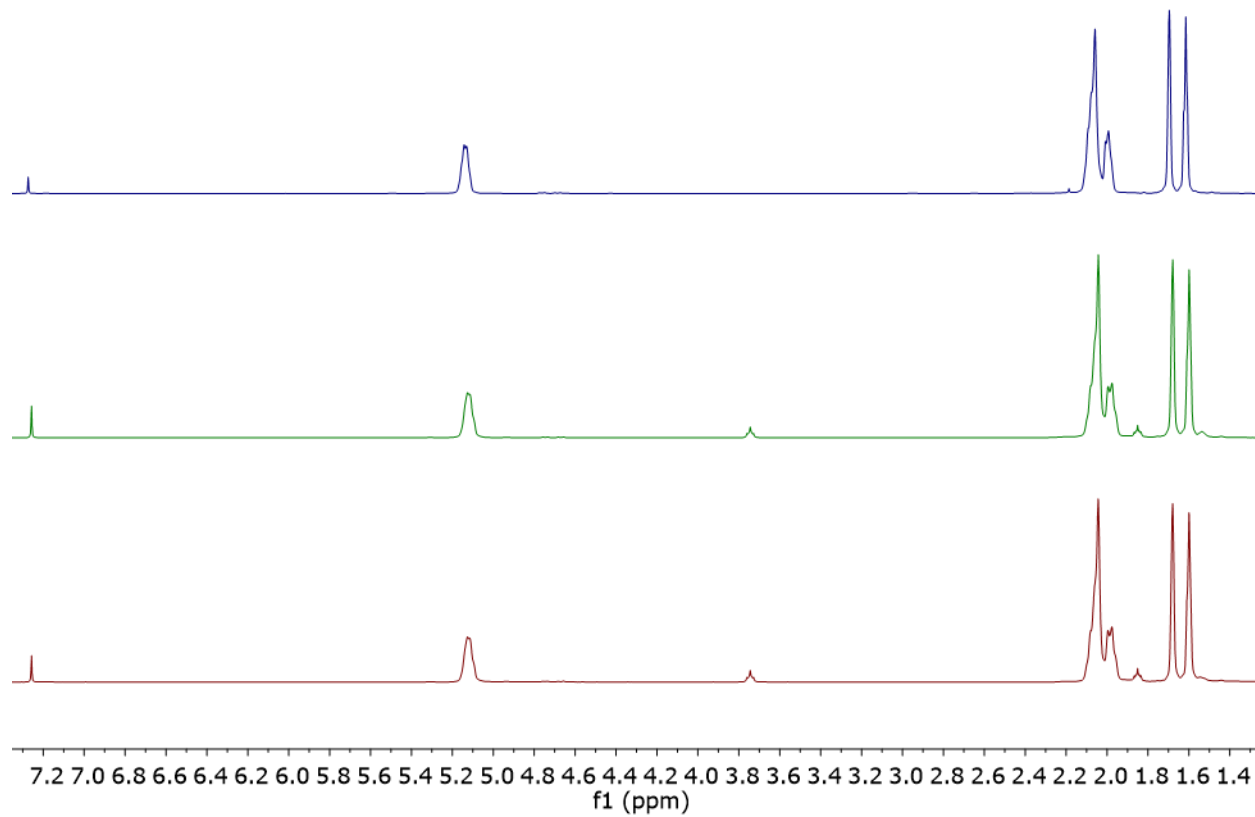

**Fig. S7**  $^1\text{H}$  NMR spectrum of PIP 800 equivalents generated by **6**/[Ph<sub>3</sub>C][B(C<sub>6</sub>F<sub>5</sub>)<sub>4</sub>] from **Table 1**, entry 4 in CDCl<sub>3</sub> at 298 K (24 h).



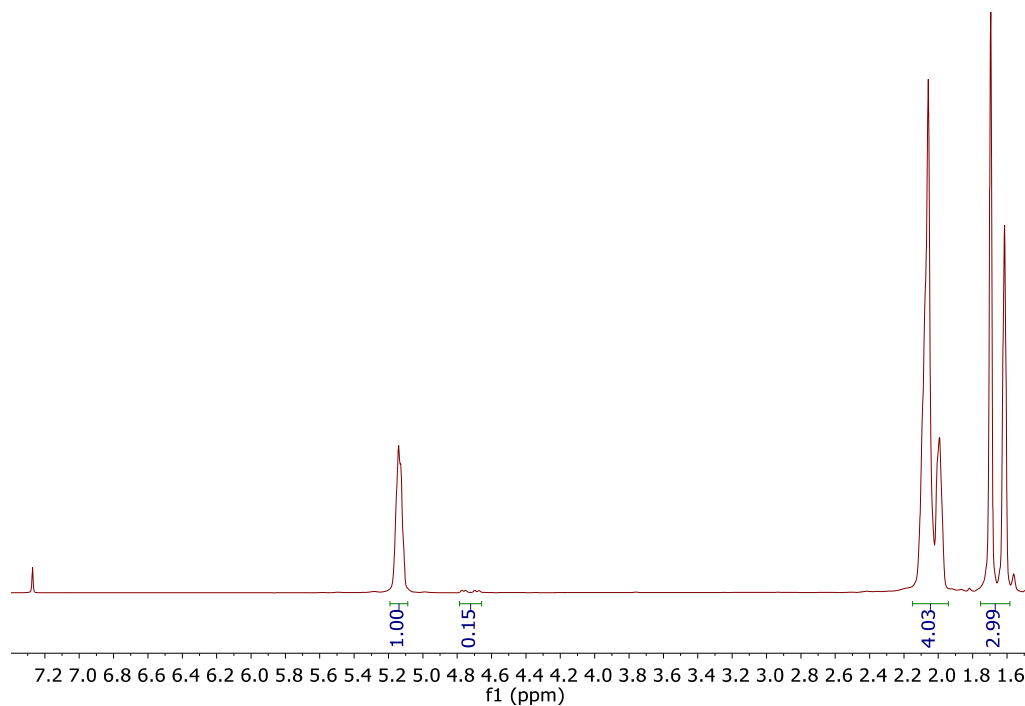

**Fig. S8** <sup>1</sup>H NMR spectrum of PIP 800 equivalents generated by **6**/[Ph<sub>3</sub>C][B(C<sub>6</sub>F<sub>5</sub>)<sub>4</sub>] from **Table 1**, entry 5 in CDCl<sub>3</sub> at 298 K (30 min).

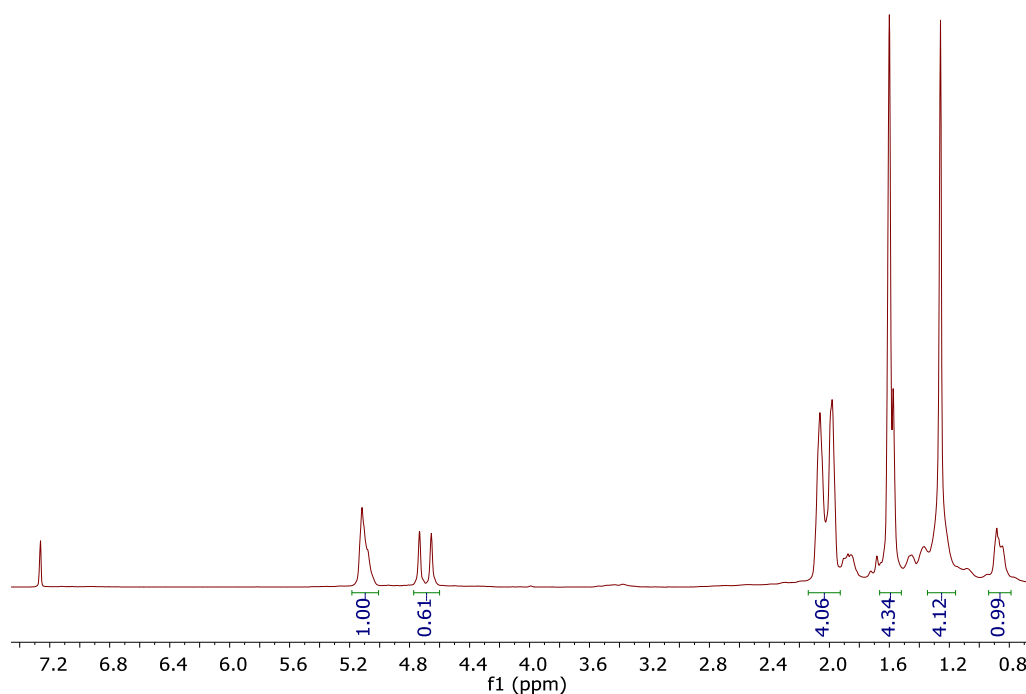

**Fig. S9** <sup>1</sup>H NMR spectrum of PIP 800 equivalents generated by **8**/[Ph<sub>3</sub>C][B(C<sub>6</sub>F<sub>5</sub>)<sub>4</sub>] from **Table 1**, entry 6 in CDCl<sub>3</sub> at 298 K (30 min).

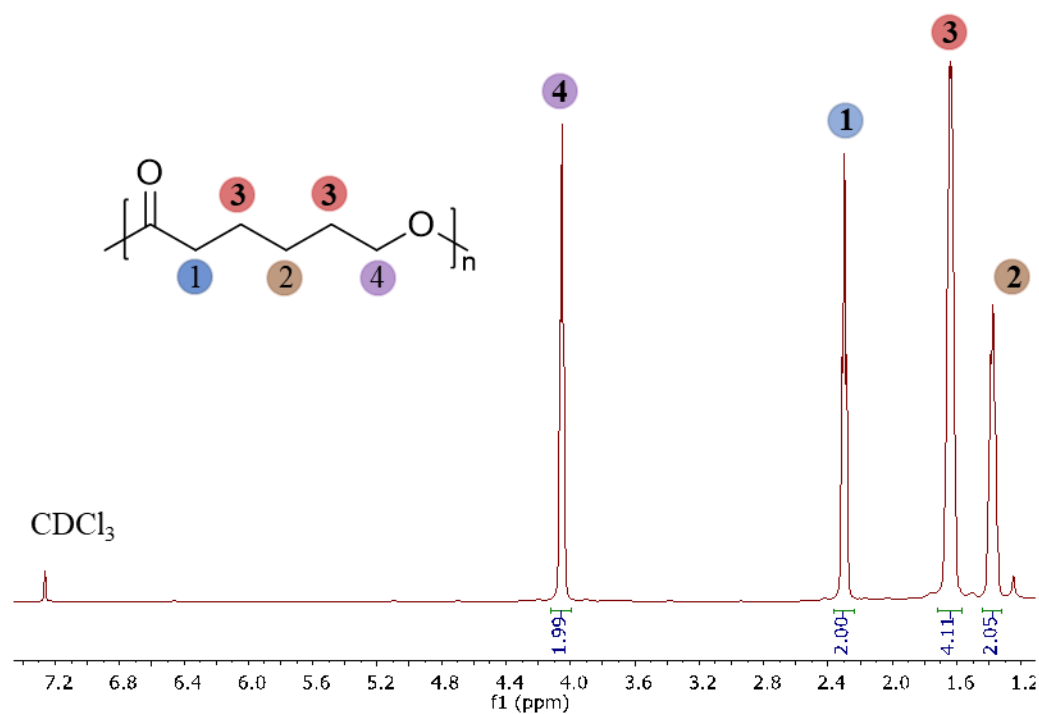

**Fig. S10** <sup>1</sup>H NMR spectrum of PCL 300 equivalents generated by **6**/[Ph<sub>3</sub>C][B(C<sub>6</sub>F<sub>5</sub>)<sub>4</sub>] from **Table 1**, entry 7 in CDCl<sub>3</sub> at 298 K (10 min). Representative peak assignment for PCL.

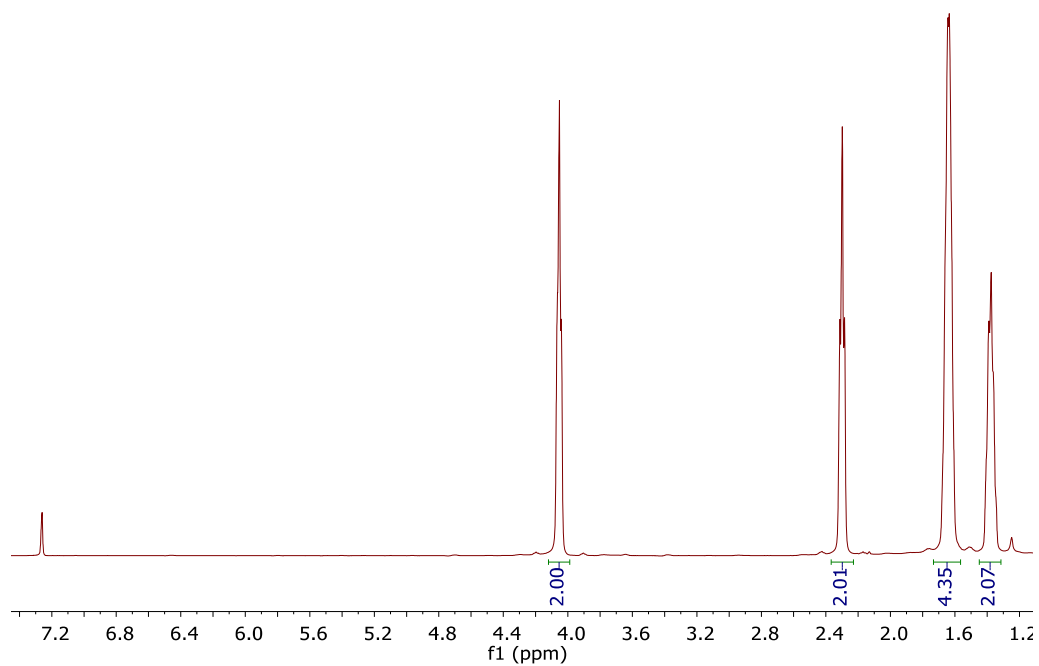

**Fig. S11** <sup>1</sup>H NMR spectrum of PCL 300 equivalents generated by **8**/[Ph<sub>3</sub>C][B(C<sub>6</sub>F<sub>5</sub>)<sub>4</sub>] from **Table 1**, entry 8 in CDCl<sub>3</sub> at 298 K (10 min).

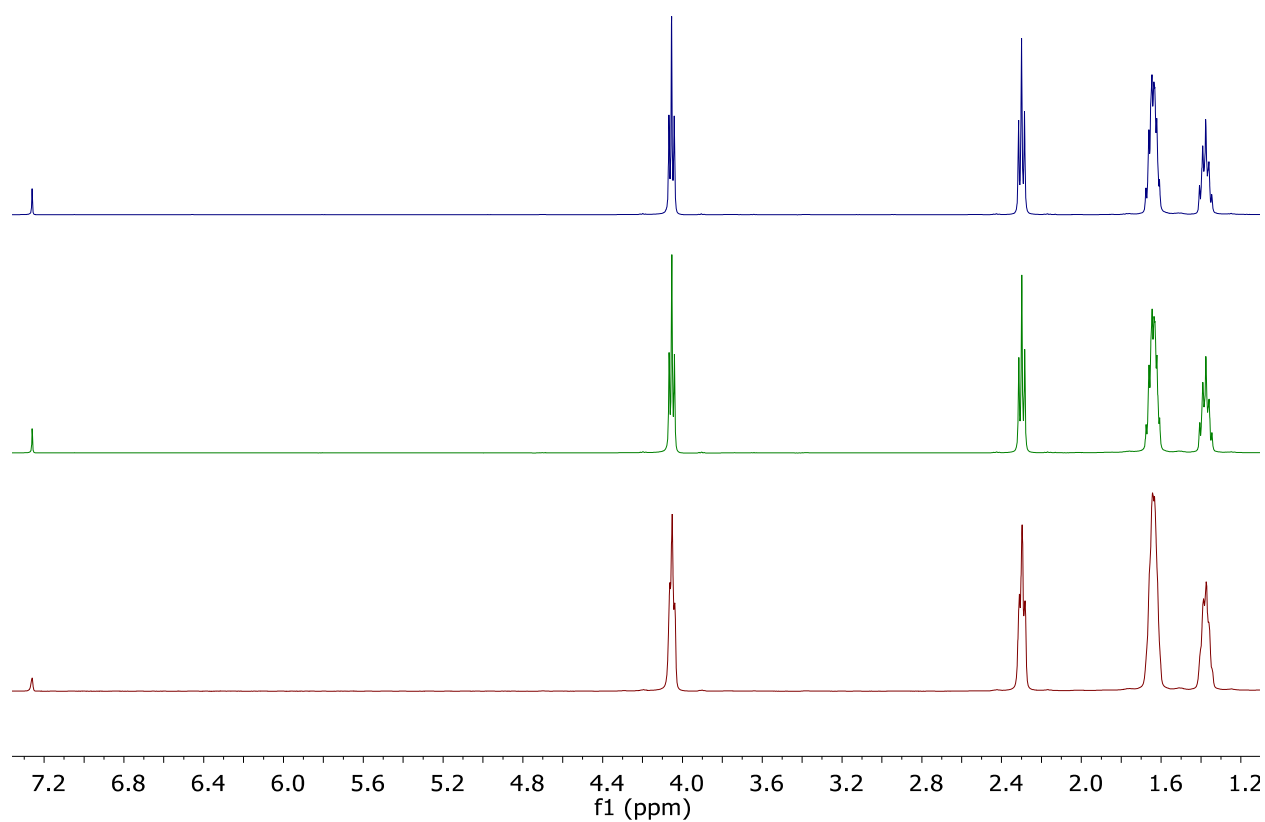

**Fig. S12**  $^1\text{H}$  NMR spectrum of PCL 300 equivalents generated by **6**/[Ph<sub>3</sub>C][B(C<sub>6</sub>F<sub>5</sub>)<sub>4</sub>] from **Table 1**, entry 9 in CDCl<sub>3</sub> at 298 K (2 h).

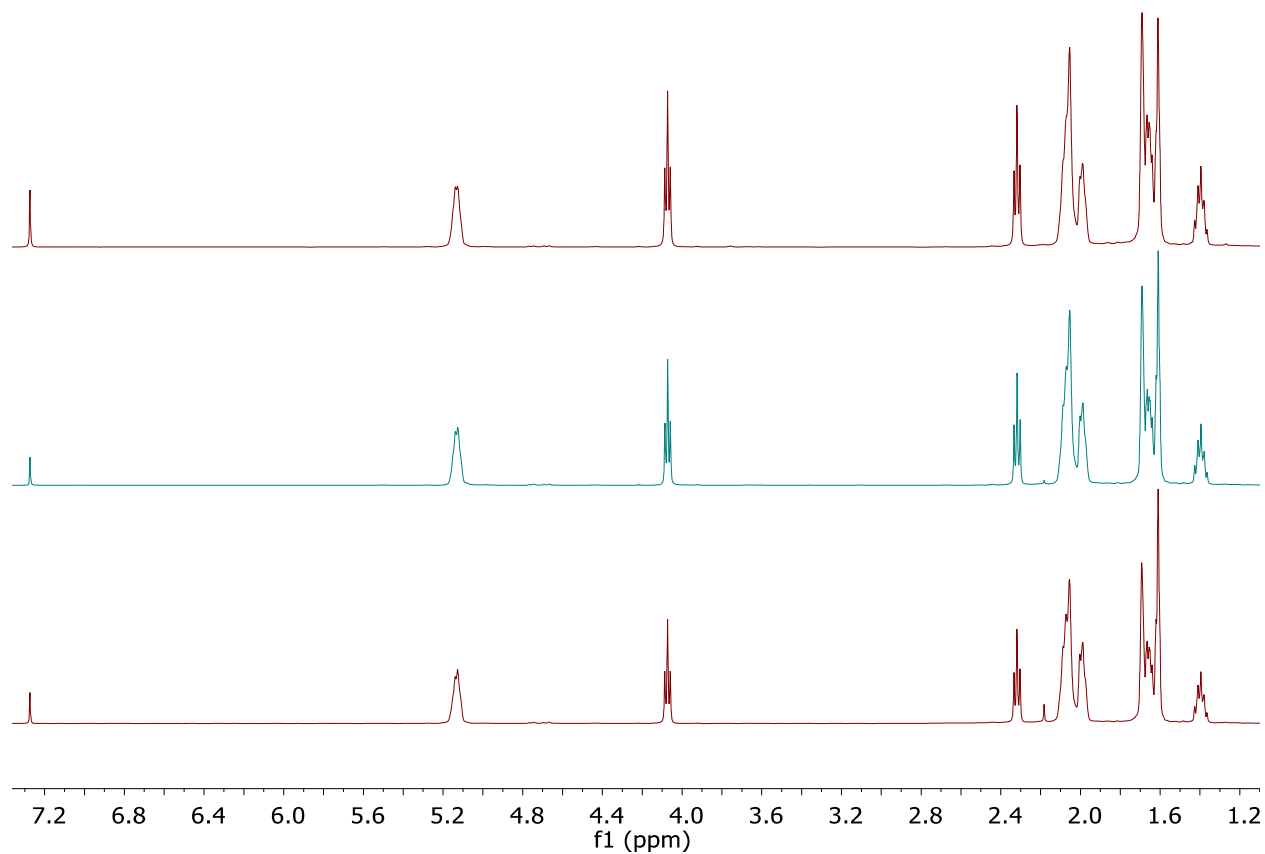

**Fig. S13**  $^1\text{H}$  NMR spectrum of PIP-*b*-PCL 800:300 equivalents generated by **6**/[Ph<sub>3</sub>C][B(C<sub>6</sub>F<sub>5</sub>)<sub>4</sub>] from **Table 2**, entry 1 in CDCl<sub>3</sub> at 298 K.

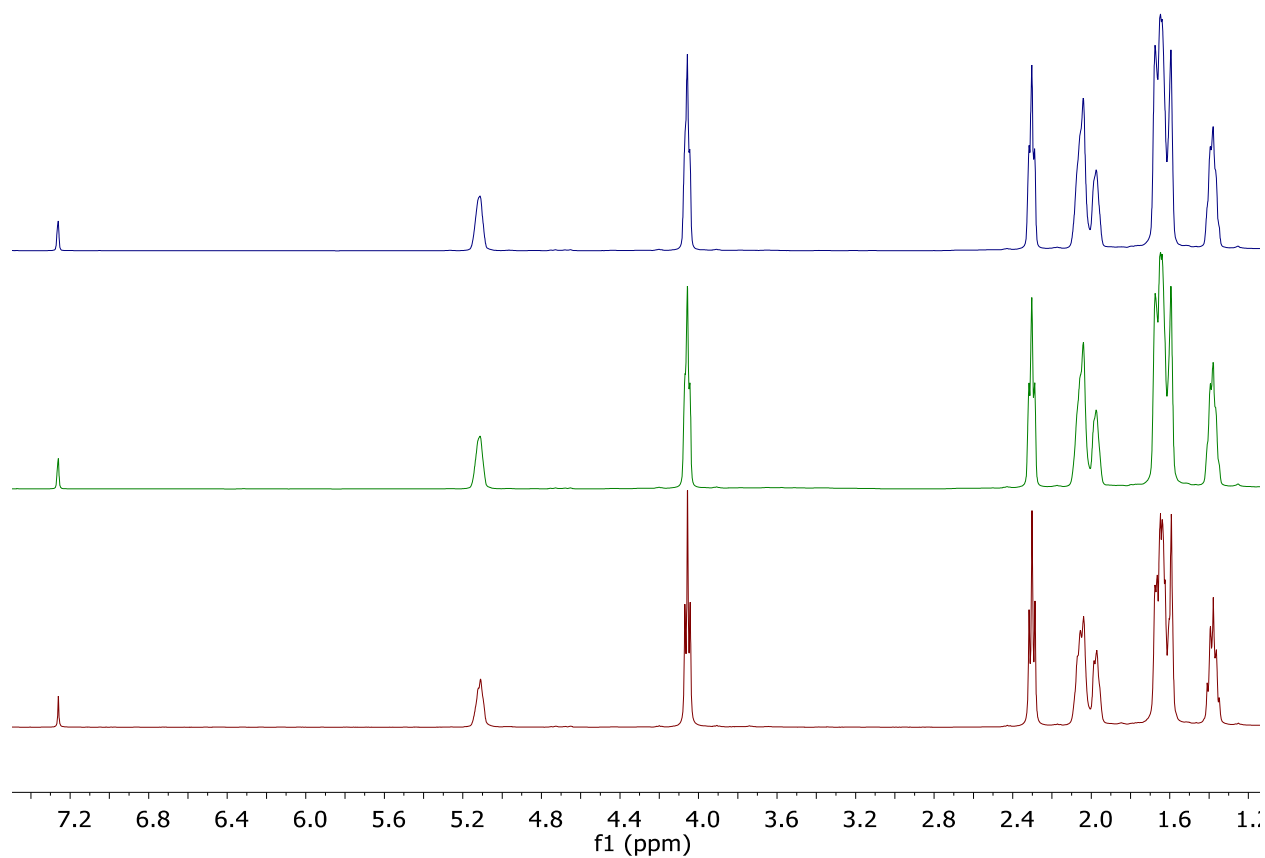

**Fig. S14**  $^1\text{H}$  NMR spectrum of PIP-*b*-PCL 550:550 equivalents generated by **6**/[Ph<sub>3</sub>C][B(C<sub>6</sub>F<sub>5</sub>)<sub>4</sub>] from **Table 2**, entry 2 in CDCl<sub>3</sub> at 298 K.

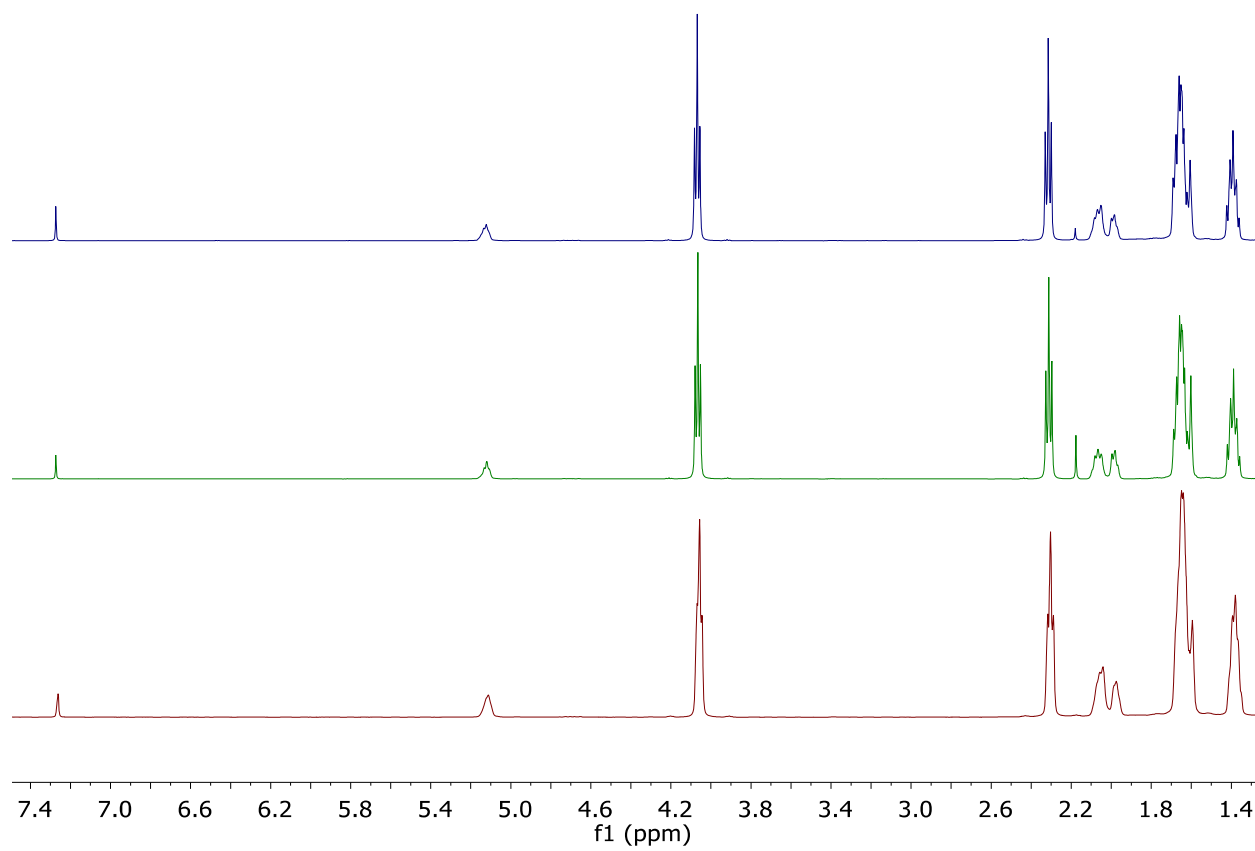

**Fig. S15**  $^1\text{H}$  NMR spectrum of PIP-*b*-PCL 300:800 equivalents generated by **6**/[Ph<sub>3</sub>C][B(C<sub>6</sub>F<sub>5</sub>)<sub>4</sub>] from **Table 2**, entry 3 in CDCl<sub>3</sub> at 298 K.

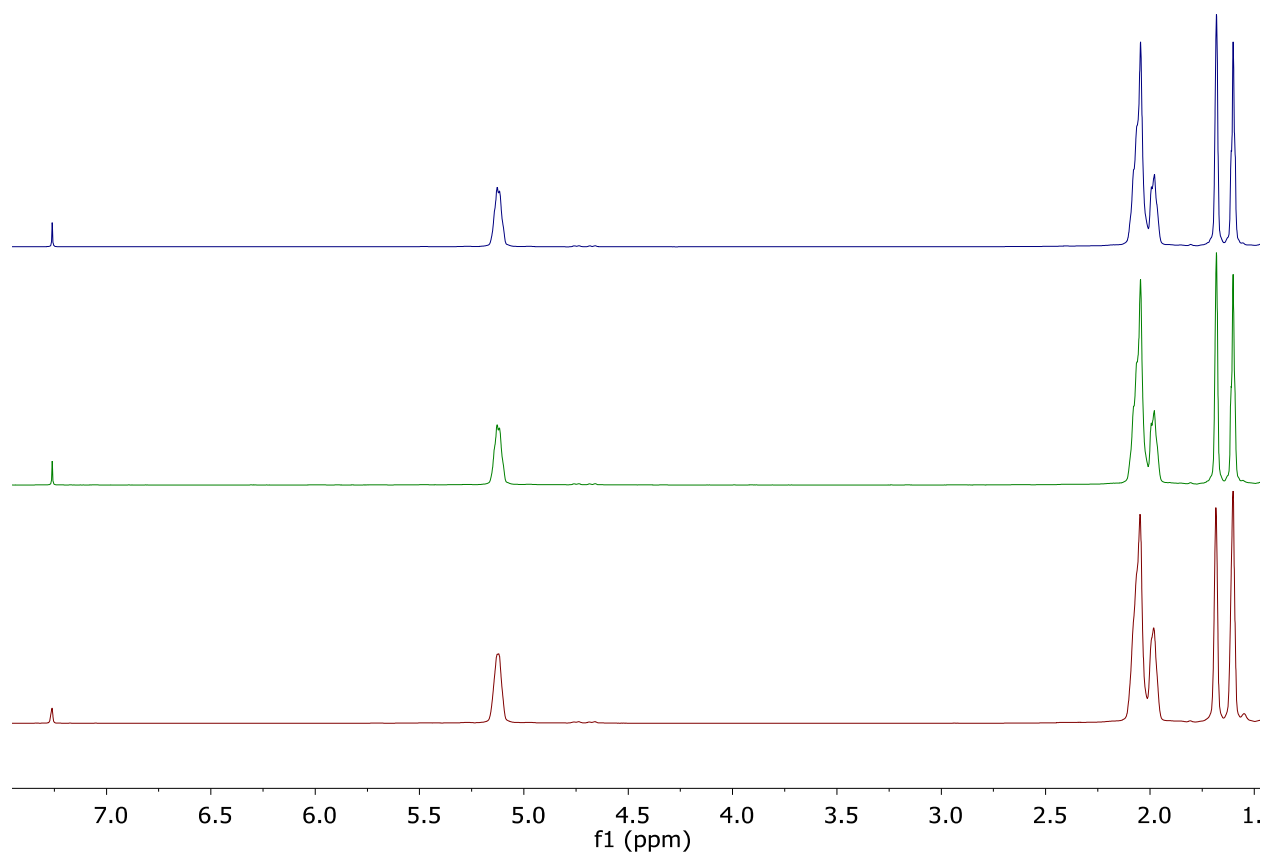

**Fig. S16**  $^1\text{H}$  NMR spectrum of PIP 800 equivalents generated by **6**/[Ph<sub>3</sub>C][B(C<sub>6</sub>F<sub>5</sub>)<sub>4</sub>] from **Table 3**, entry 1 in CDCl<sub>3</sub> at 298 K (IP addition time 0 min).

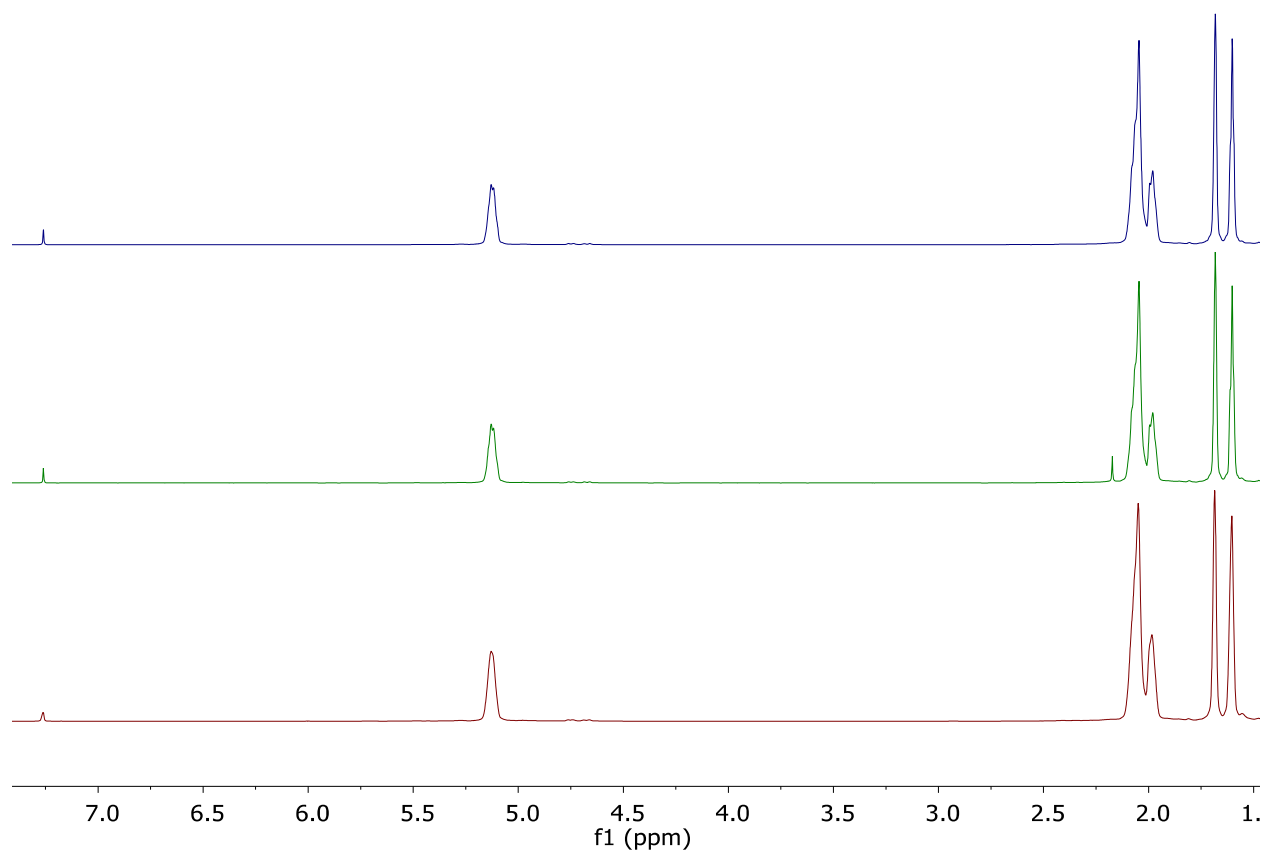

**Fig. S17**  $^1\text{H}$  NMR spectrum of PIP 800 equivalents generated by **6**/[Ph<sub>3</sub>C][B(C<sub>6</sub>F<sub>5</sub>)<sub>4</sub>] from **Table 3**, entry 2 in CDCl<sub>3</sub> at 298 K (IP addition time 30 min).



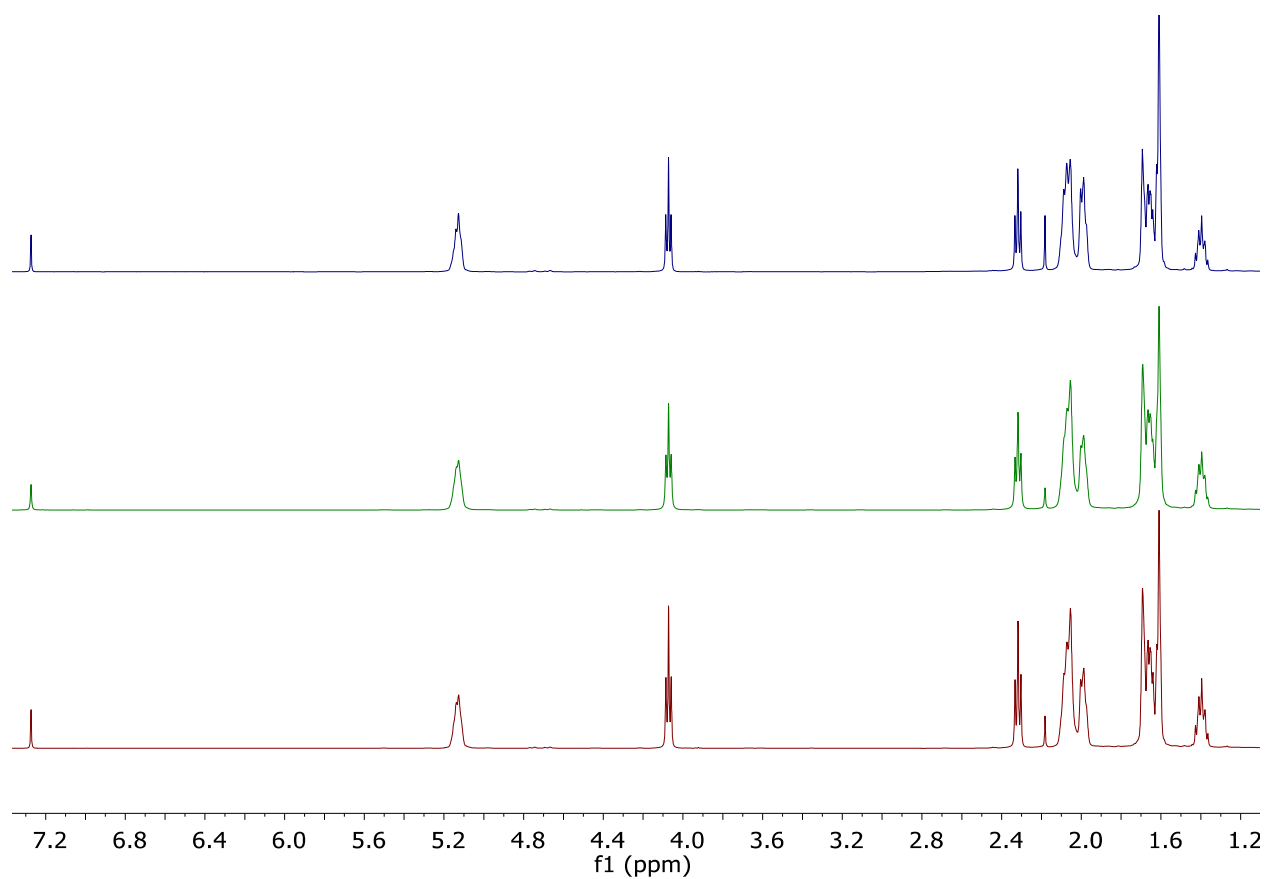

**Fig. S18**  $^1\text{H}$  NMR spectrum of PIP-*b*-PCL 800:300 equivalents generated by **6** and 0.5 equivalents of  $[\text{Ph}_3\text{C}][\text{B}(\text{C}_6\text{F}_5)_4]$  from **Table 3**, entry 3 in  $\text{CDCl}_3$  at 298 K.

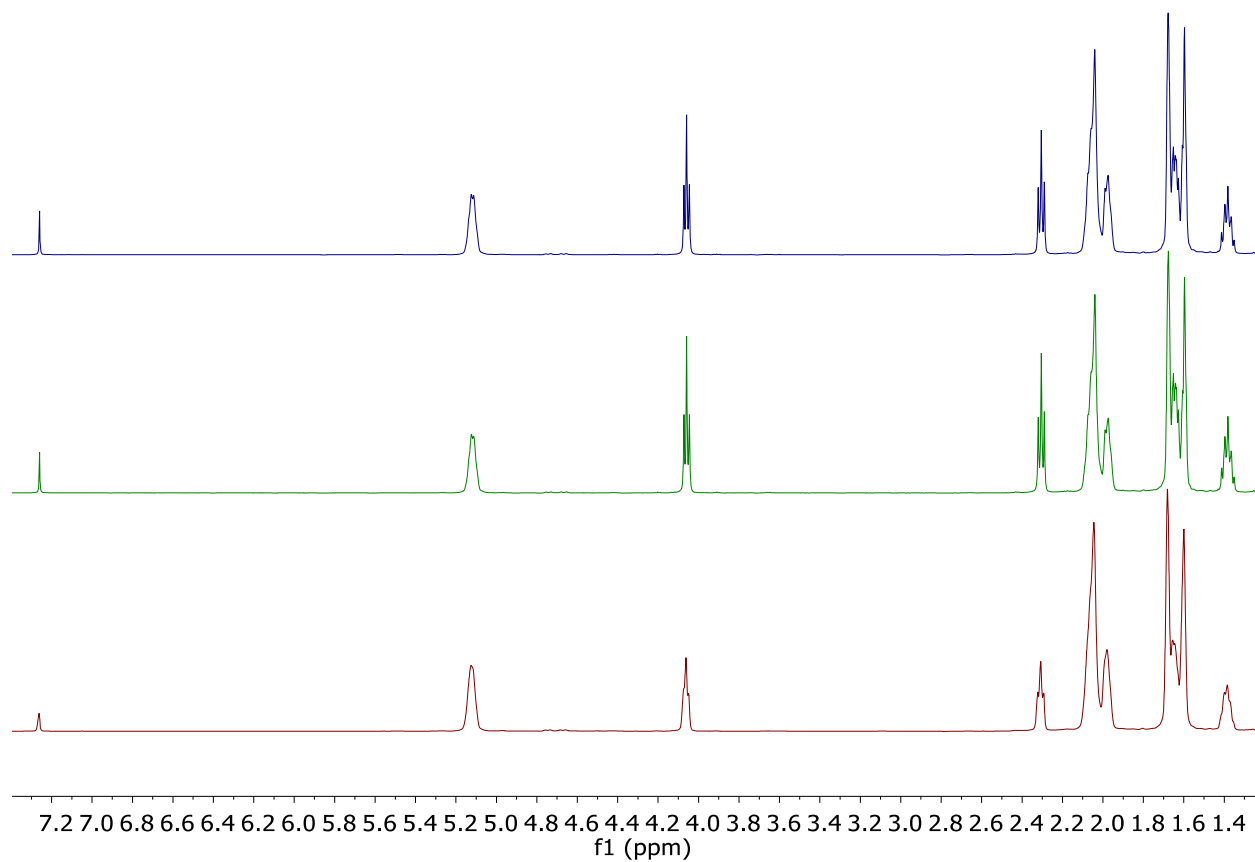

**Fig. S19**  $^1\text{H}$  NMR spectrum of PIP-*b*-PCL 800:300 equivalents generated by **6** and 1.5 equivalents of  $[\text{Ph}_3\text{C}][\text{B}(\text{C}_6\text{F}_5)_4]$  from **Table 3**, entry 4 in  $\text{CDCl}_3$  at 298 K.

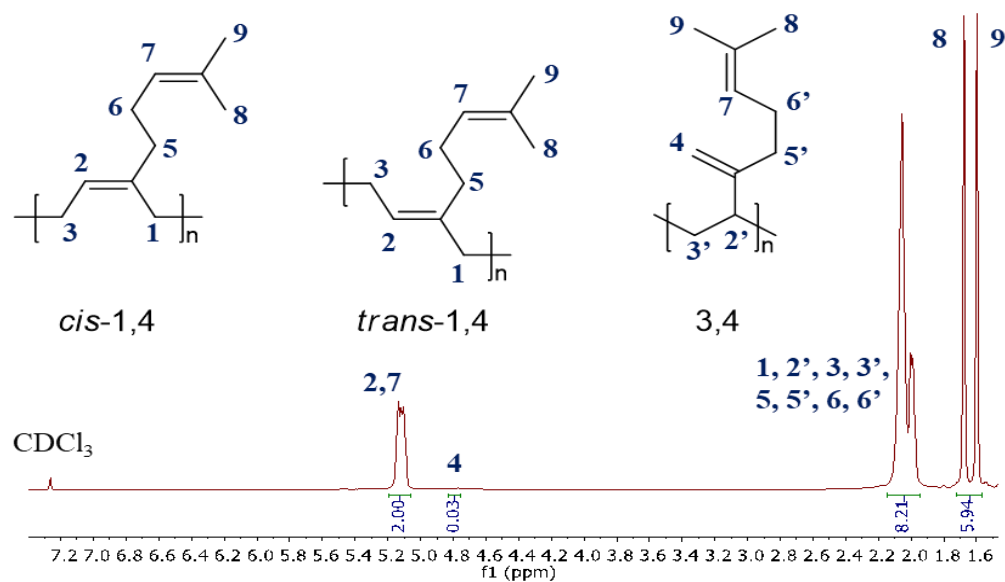

**Fig. S20** <sup>1</sup>H NMR spectrum of PMyr 800 equivalents generated by **6**/[Ph<sub>3</sub>C][B(C<sub>6</sub>F<sub>5</sub>)<sub>4</sub>] from **Table 4**, entry 1 in CDCl<sub>3</sub> at 298 K (30 min). Representative peak assignment for PMyr.

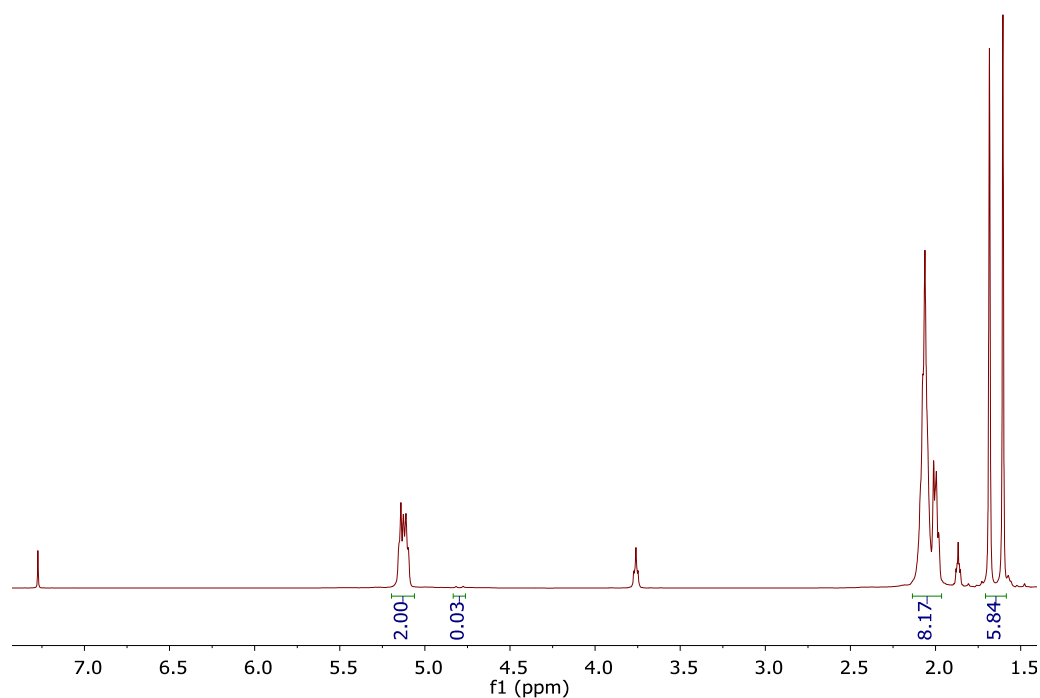

**Fig. S21** <sup>1</sup>H NMR spectrum of PMyr 800 equivalents generated by **6**/[Ph<sub>3</sub>C][B(C<sub>6</sub>F<sub>5</sub>)<sub>4</sub>] from **Table 4**, entry 2 in CDCl<sub>3</sub> at 298 K (90 min).

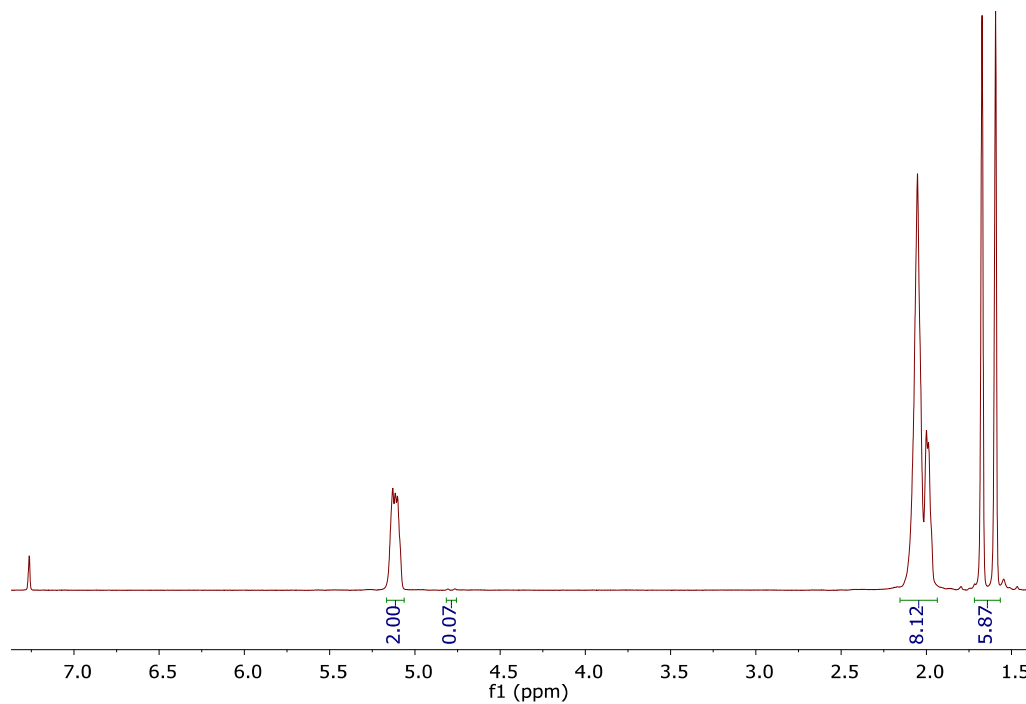

**Fig. S22**  $^1\text{H}$  NMR spectrum of PMyr 800 equivalents generated by **6**/[Ph<sub>3</sub>C][B(C<sub>6</sub>F<sub>5</sub>)<sub>4</sub>] from **Table 4**, entry 3 in CDCl<sub>3</sub> at 298 K (3 h).

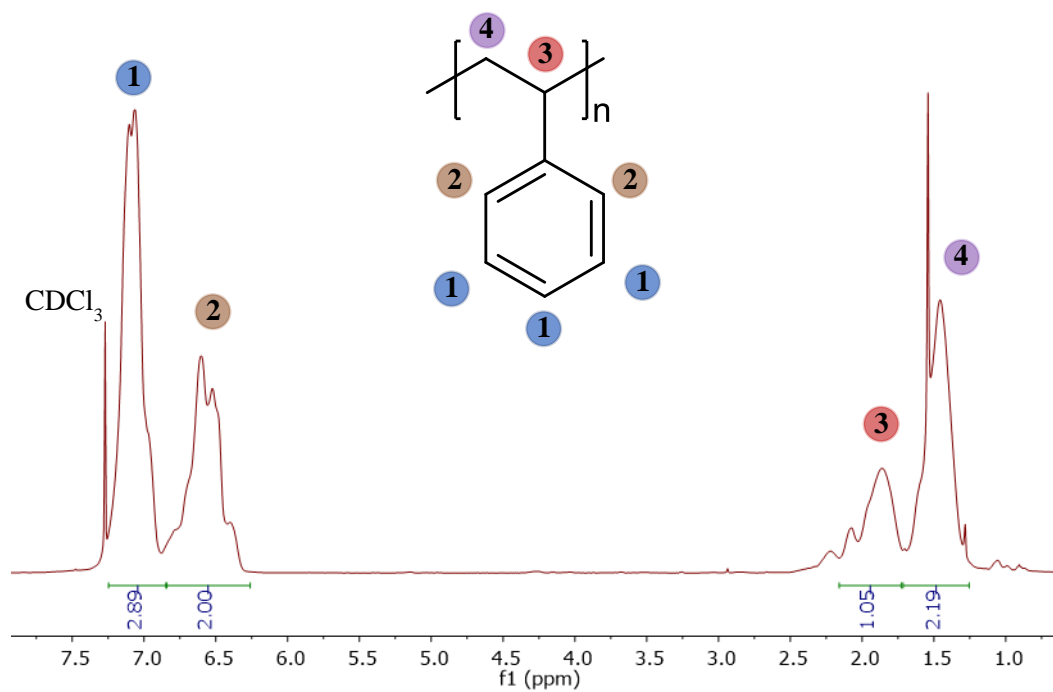

**Fig. S23**  $^1\text{H}$  NMR spectrum of PS 800 equivalents generated by **6**/[Ph<sub>3</sub>C][B(C<sub>6</sub>F<sub>5</sub>)<sub>4</sub>] from **Table 4**, entry 4 in CDCl<sub>3</sub> at 298 K (30 min). Representative peak assignment for PS.

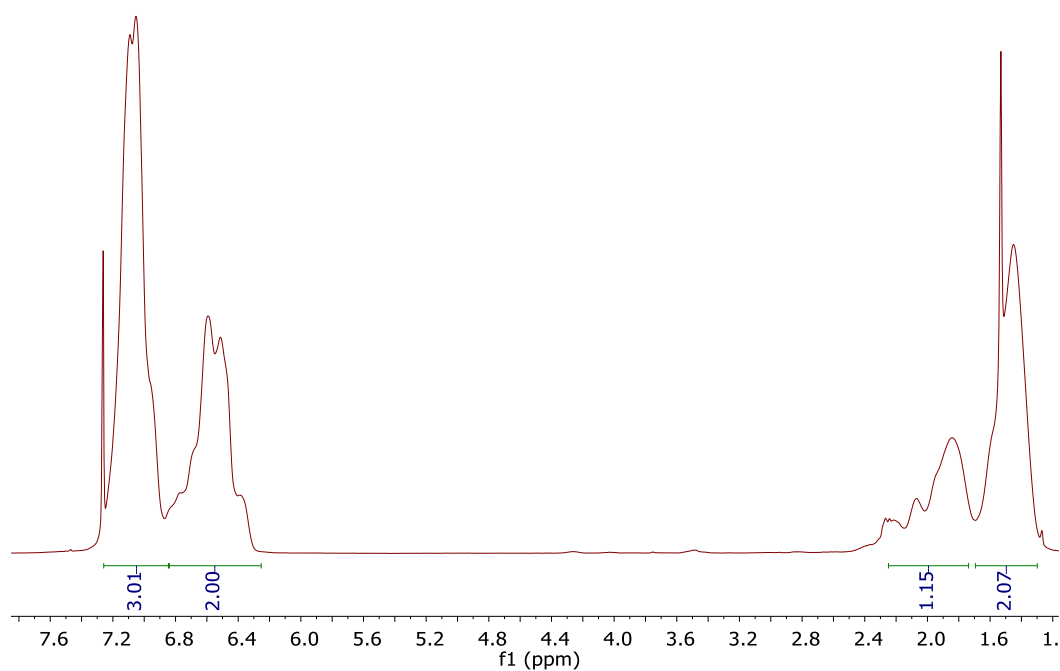

**Fig. S24**  $^1\text{H}$  NMR spectrum of PS 800 equivalents generated by **6**/[Ph<sub>3</sub>C][B(C<sub>6</sub>F<sub>5</sub>)<sub>4</sub>] from **Table 4**, entry 5 in CDCl<sub>3</sub> at 298 K (20 h).

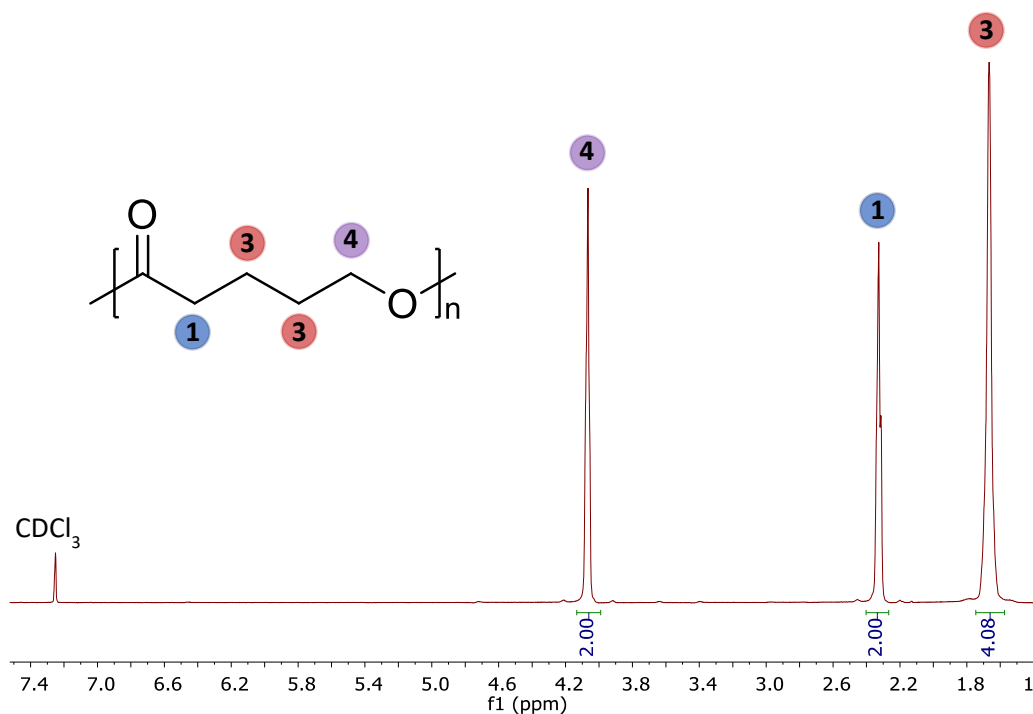

**Fig. S25**  $^1\text{H}$  NMR spectrum of PVL 300 equivalents generated by **6**/[Ph<sub>3</sub>C][B(C<sub>6</sub>F<sub>5</sub>)<sub>4</sub>] from **Table 4**, entry 6 in CDCl<sub>3</sub> at 298 K (10 min). Representative peak assignment for PVL.

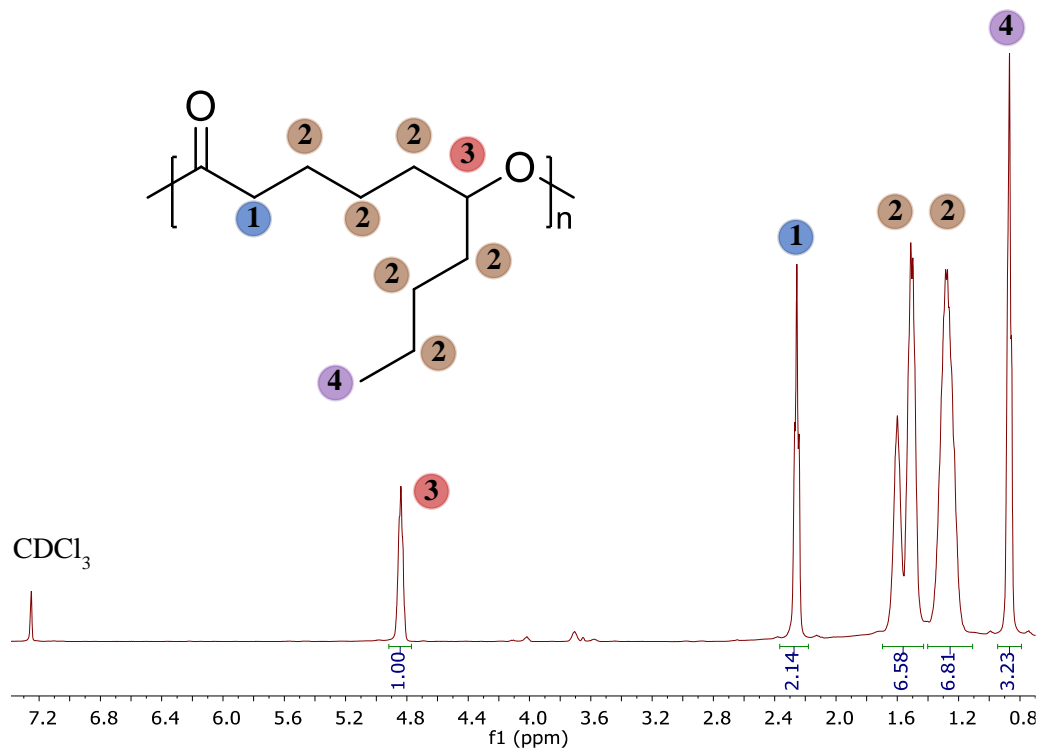

**Fig. S26**  $^1\text{H}$  NMR spectrum of PDL 300 equivalents generated by **6**/[Ph<sub>3</sub>C][B(C<sub>6</sub>F<sub>5</sub>)<sub>4</sub>] from **Table 4**, entry 7 in CDCl<sub>3</sub> at 298 K (6 h). Representative peak assignment for PDL.

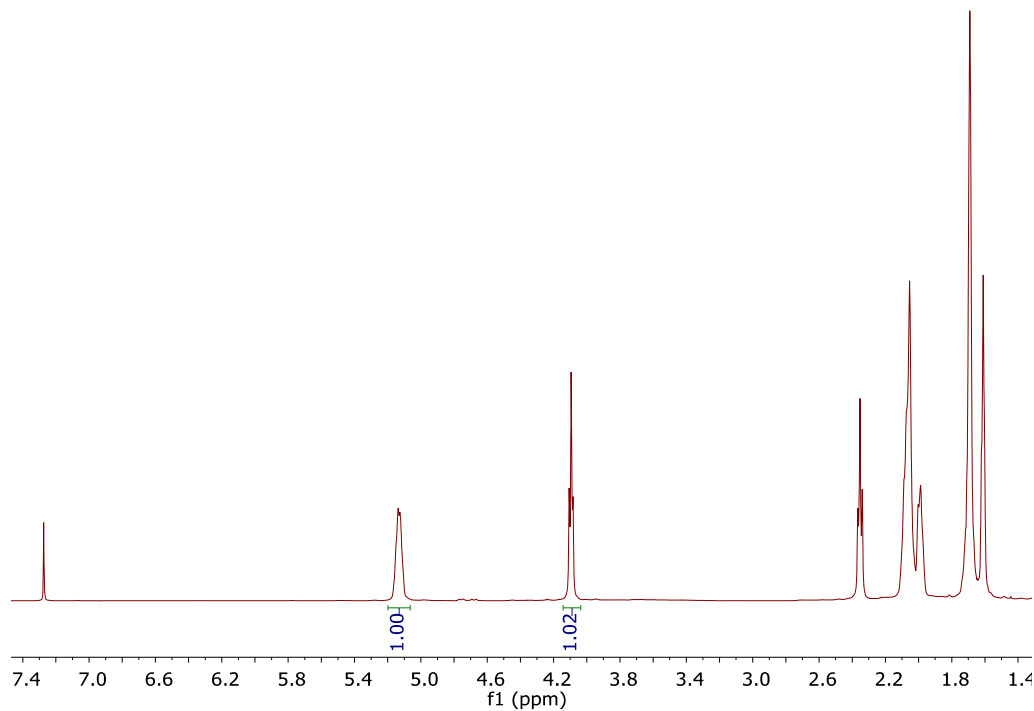

**Fig. S27**  $^1\text{H}$  NMR spectrum of PIP-*b*-PVL 800:300 equivalents generated by **6**/[Ph<sub>3</sub>C][B(C<sub>6</sub>F<sub>5</sub>)<sub>4</sub>] from **Table 5**, entry 1 in CDCl<sub>3</sub> at 298 K.

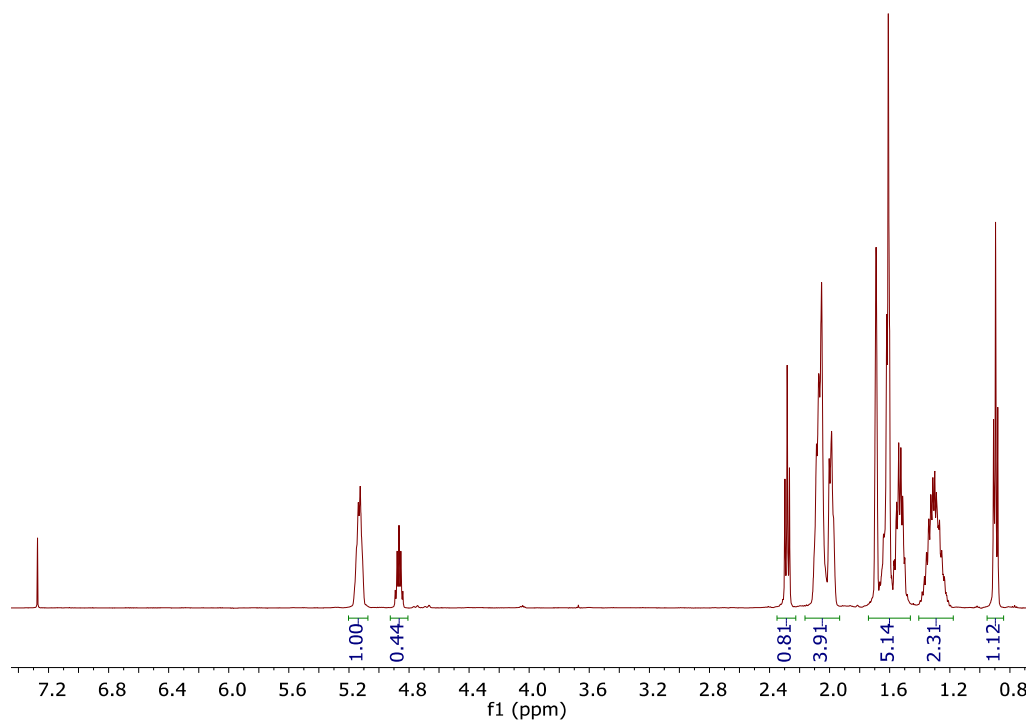

**Fig. S28**  $^1\text{H}$  NMR spectrum of PIP-*b*-PDL 800:300 equivalents generated by **6**/[Ph<sub>3</sub>C][B(C<sub>6</sub>F<sub>5</sub>)<sub>4</sub>] from Table 5, entry 2 in CDCl<sub>3</sub> at 298 K.

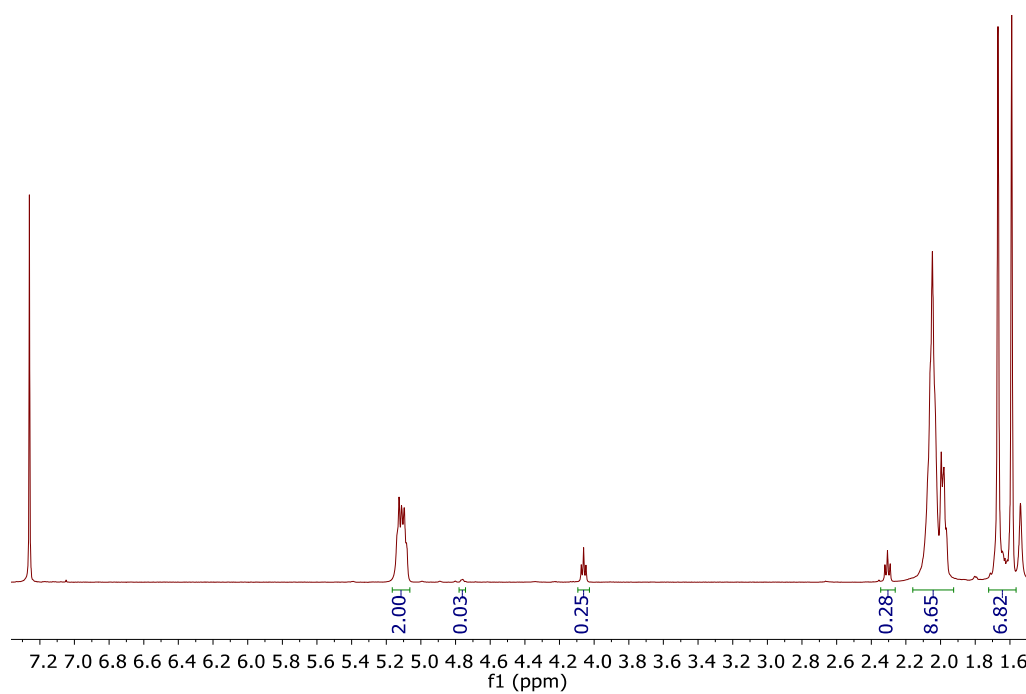

**Fig. S29**  $^1\text{H}$  NMR spectrum of PMyr-*b*-PCL 800:300 equivalents generated by **6**/[Ph<sub>3</sub>C][B(C<sub>6</sub>F<sub>5</sub>)<sub>4</sub>] from Table 5, entry 3 in CDCl<sub>3</sub> at 298 K.

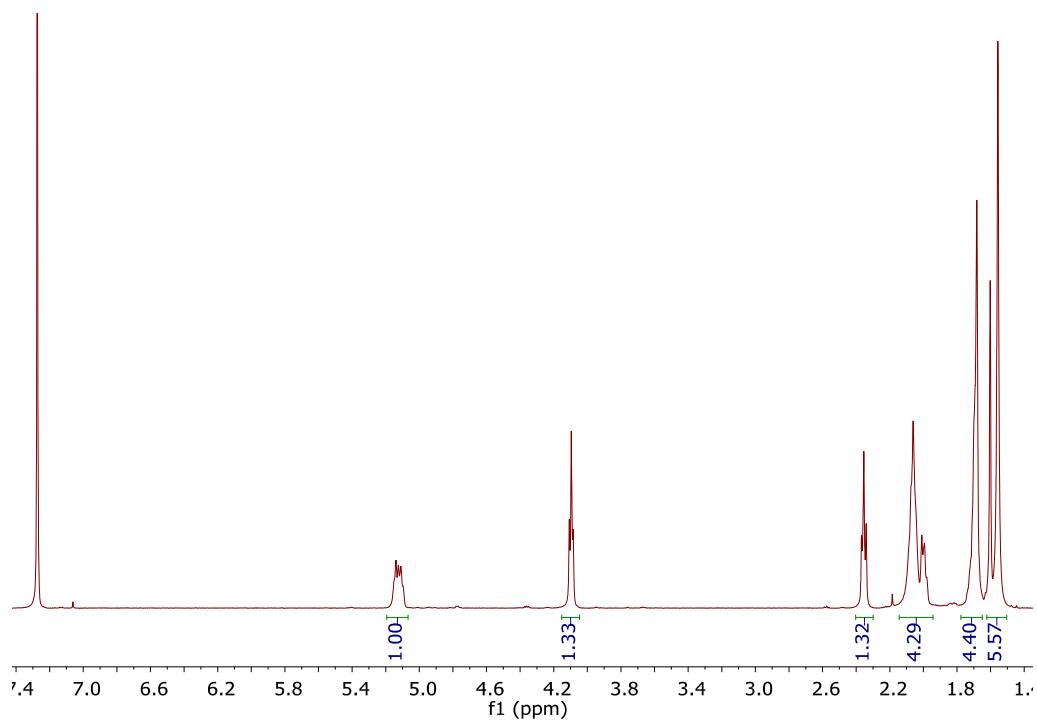

**Fig. S30**  $^1\text{H}$  NMR spectrum of PMyr-*b*-PVL 800:300 equivalents generated by **6**/[Ph<sub>3</sub>C][B(C<sub>6</sub>F<sub>5</sub>)<sub>4</sub>] from **Table 5**, entry 4 in CDCl<sub>3</sub> at 298 K.

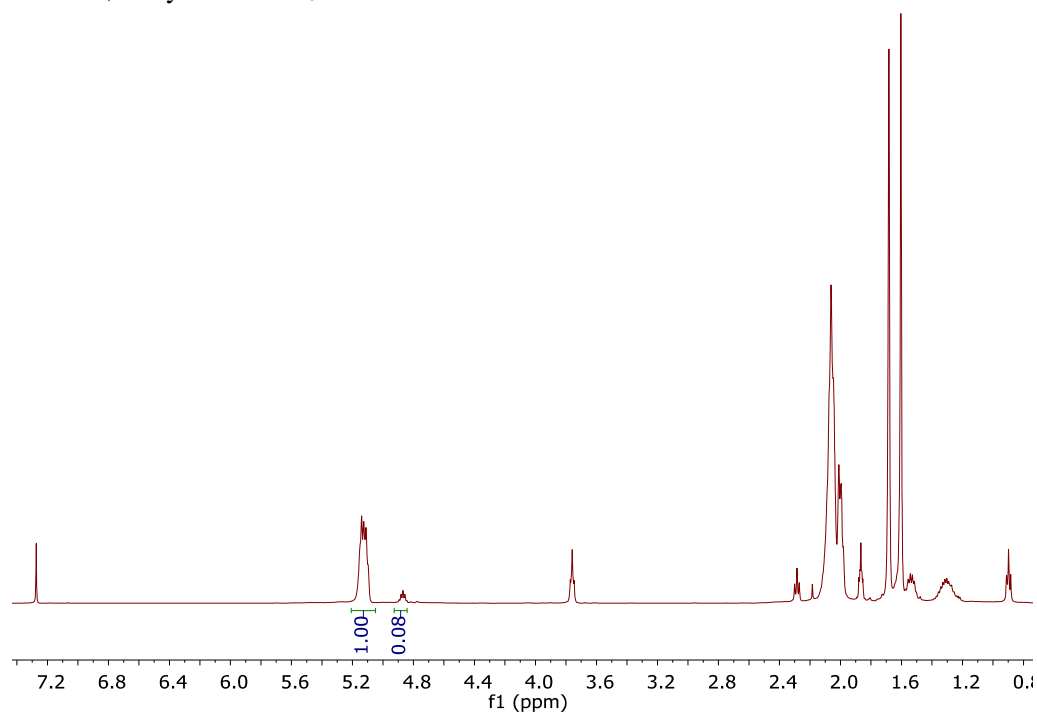

**Fig. S31**  $^1\text{H}$  NMR spectrum of PMyr-*b*-PDL 800:300 equivalents generated by **6**/[Ph<sub>3</sub>C][B(C<sub>6</sub>F<sub>5</sub>)<sub>4</sub>] from **Table 5**, entry 5 in CDCl<sub>3</sub> at 298 K.



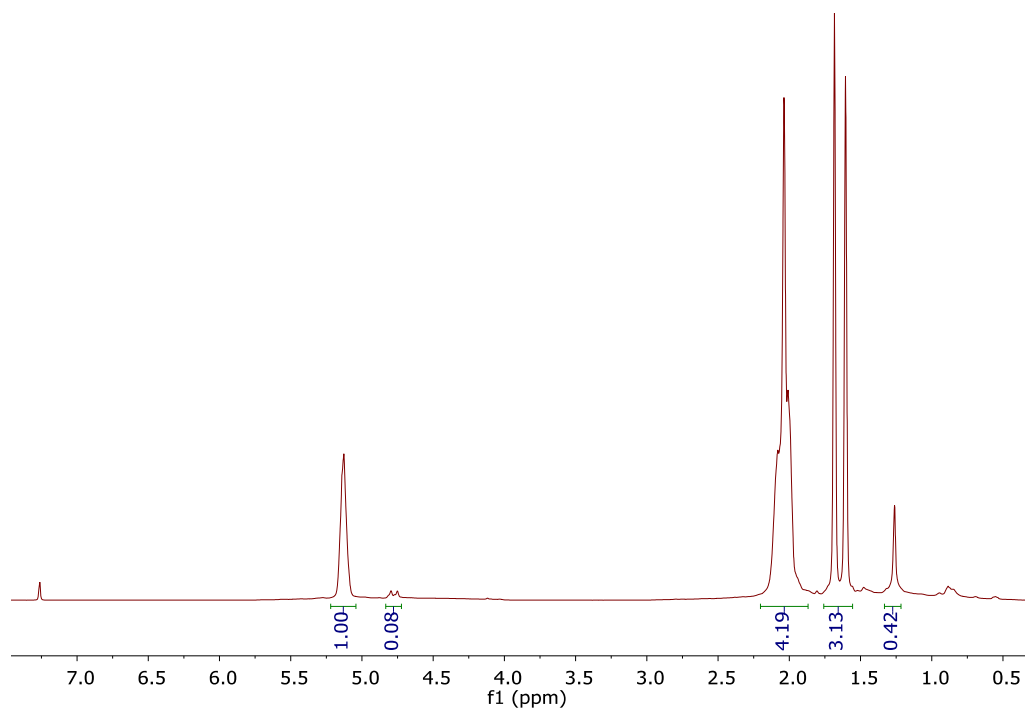

**Fig. S32**  $^1\text{H}$  NMR spectrum of PMyr 800 equivalents generated by **8**/[Ph<sub>3</sub>C][B(C<sub>6</sub>F<sub>5</sub>)<sub>4</sub>] from **Table S1**, entry 1 in CDCl<sub>3</sub> at 298 K (30 min).

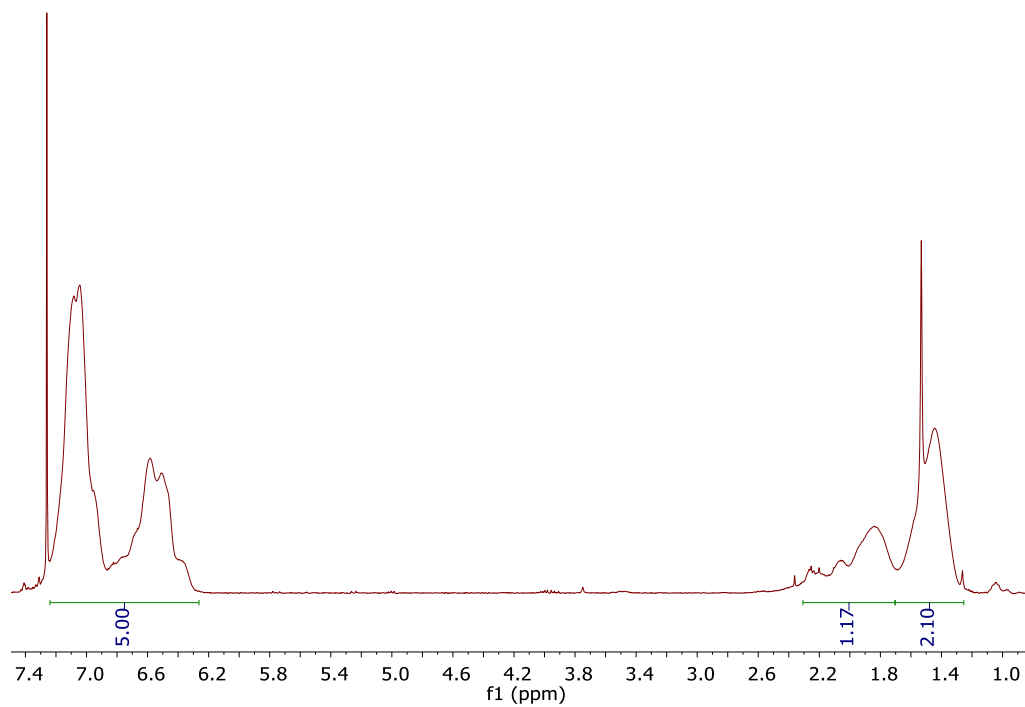

**Fig. S33**  $^1\text{H}$  NMR spectrum of PS 800 equivalents generated by **8**/[Ph<sub>3</sub>C][B(C<sub>6</sub>F<sub>5</sub>)<sub>4</sub>] from **Table S1**, entry 2 in CDCl<sub>3</sub> at 298 K (30 min).

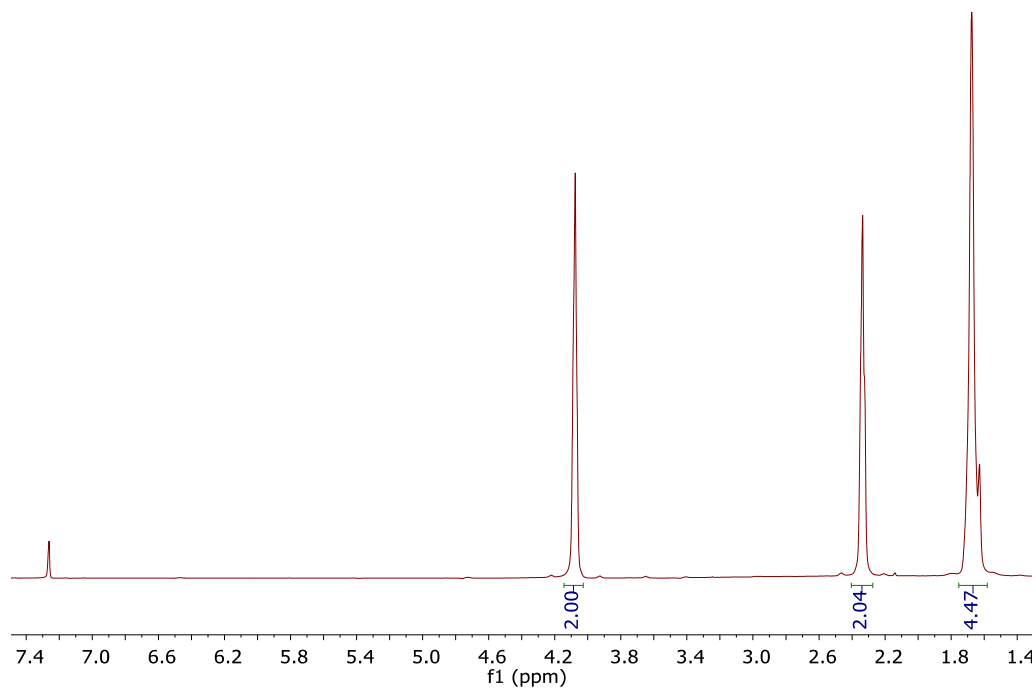

**Fig. S34** <sup>1</sup>H NMR spectrum of PVL 300 equivalents generated by **8**/[Ph<sub>3</sub>C][B(C<sub>6</sub>F<sub>5</sub>)<sub>4</sub>] from **Table S1**, entry 3 in CDCl<sub>3</sub> at 298 K (10 min).

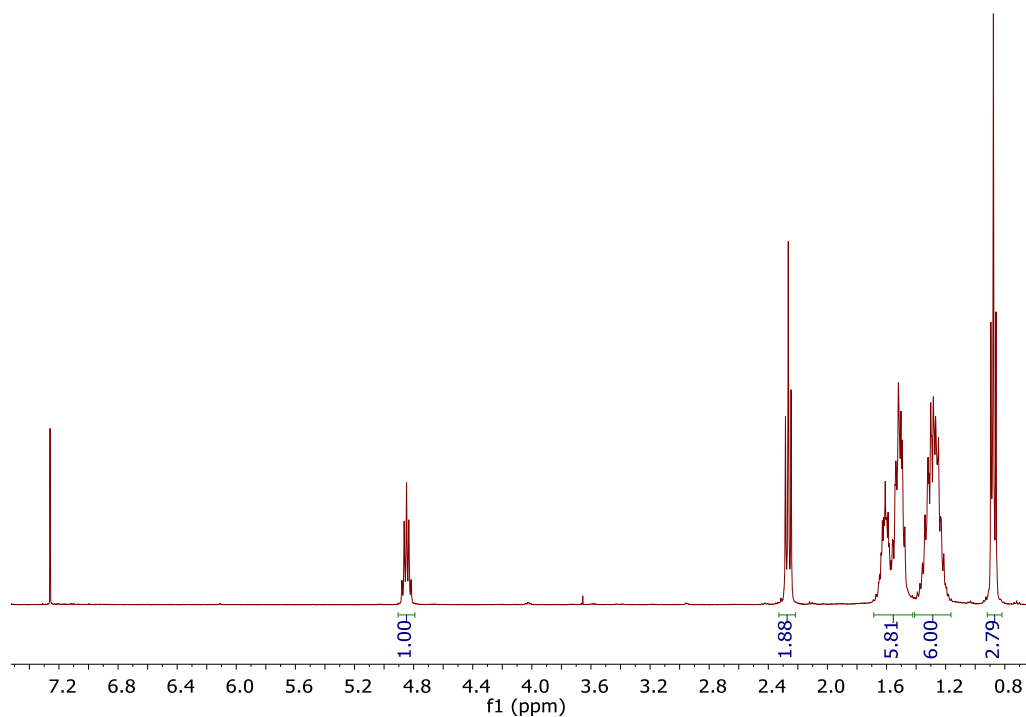

**Fig. S35** <sup>1</sup>H NMR spectrum of PDL 300 equivalents generated by **8**/[Ph<sub>3</sub>C][B(C<sub>6</sub>F<sub>5</sub>)<sub>4</sub>] from **Table S1**, entry 4 in CDCl<sub>3</sub> at 298 K (6 h).

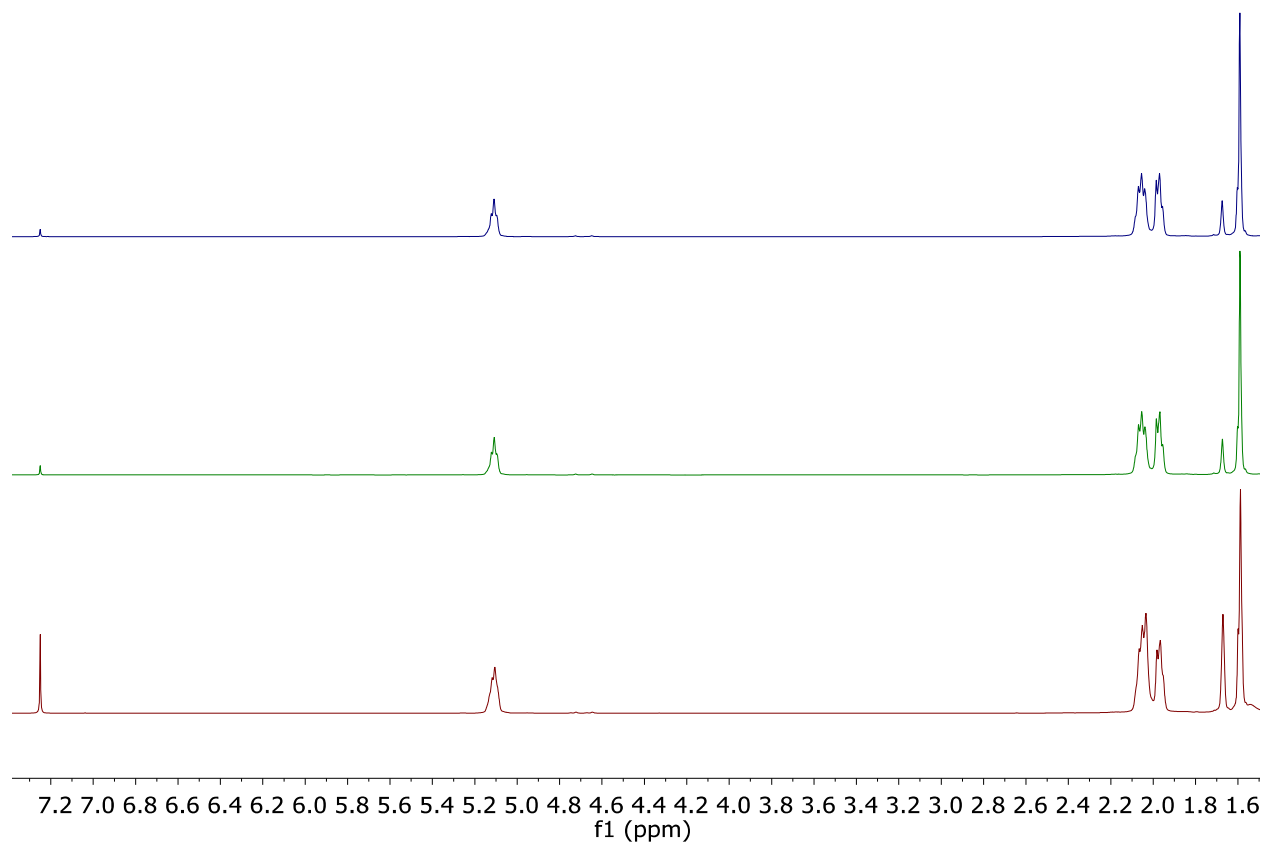

**Fig. S36**  $^1\text{H}$  NMR spectrum of PIP 300 equivalents generated by **6**/[Ph<sub>3</sub>C][B(C<sub>6</sub>F<sub>5</sub>)<sub>4</sub>] from **Table S2**, entry 1 in CDCl<sub>3</sub> at 298 K (12 h).

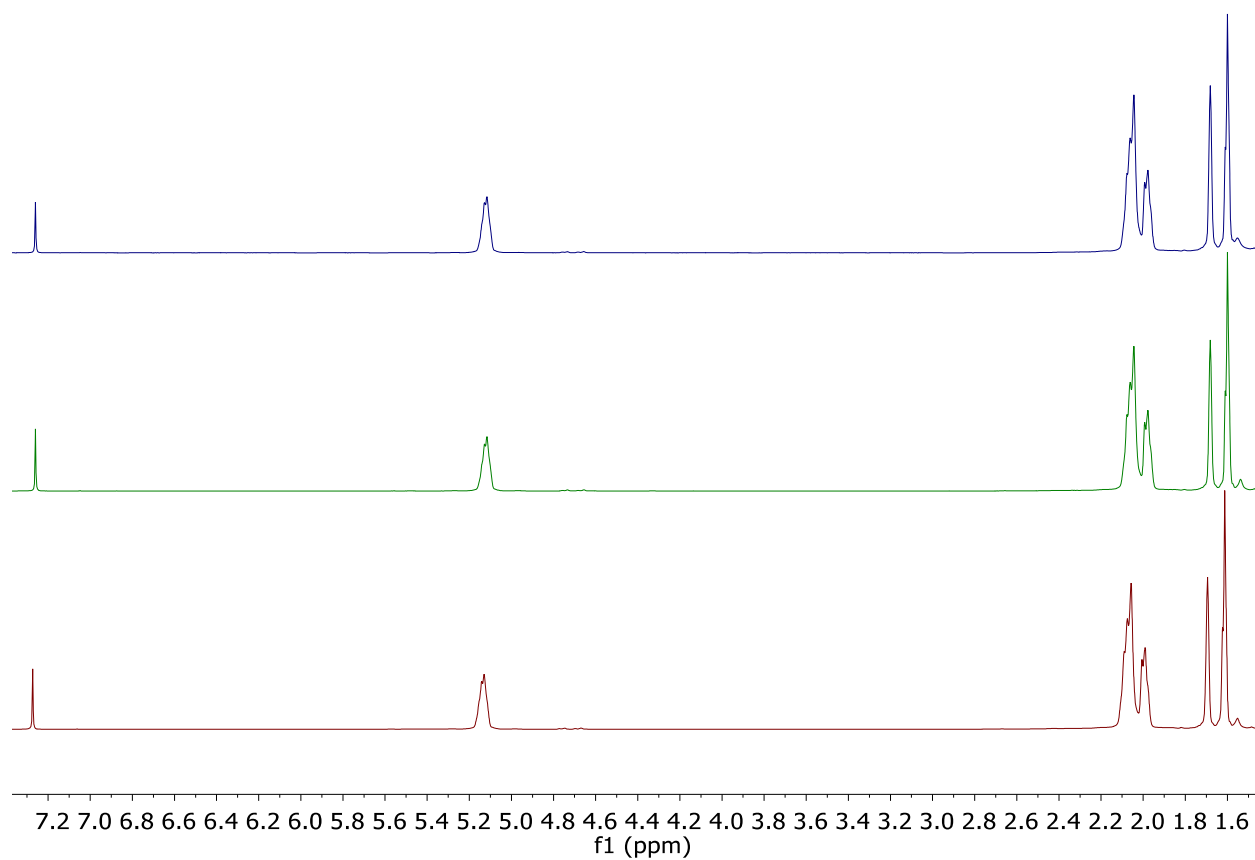

**Fig. S37**  $^1\text{H}$  NMR spectrum of PIP 550 equivalents generated by **6**/[Ph<sub>3</sub>C][B(C<sub>6</sub>F<sub>5</sub>)<sub>4</sub>] from **Table S2**, entry 2 in CDCl<sub>3</sub> at 298 K (12 h).

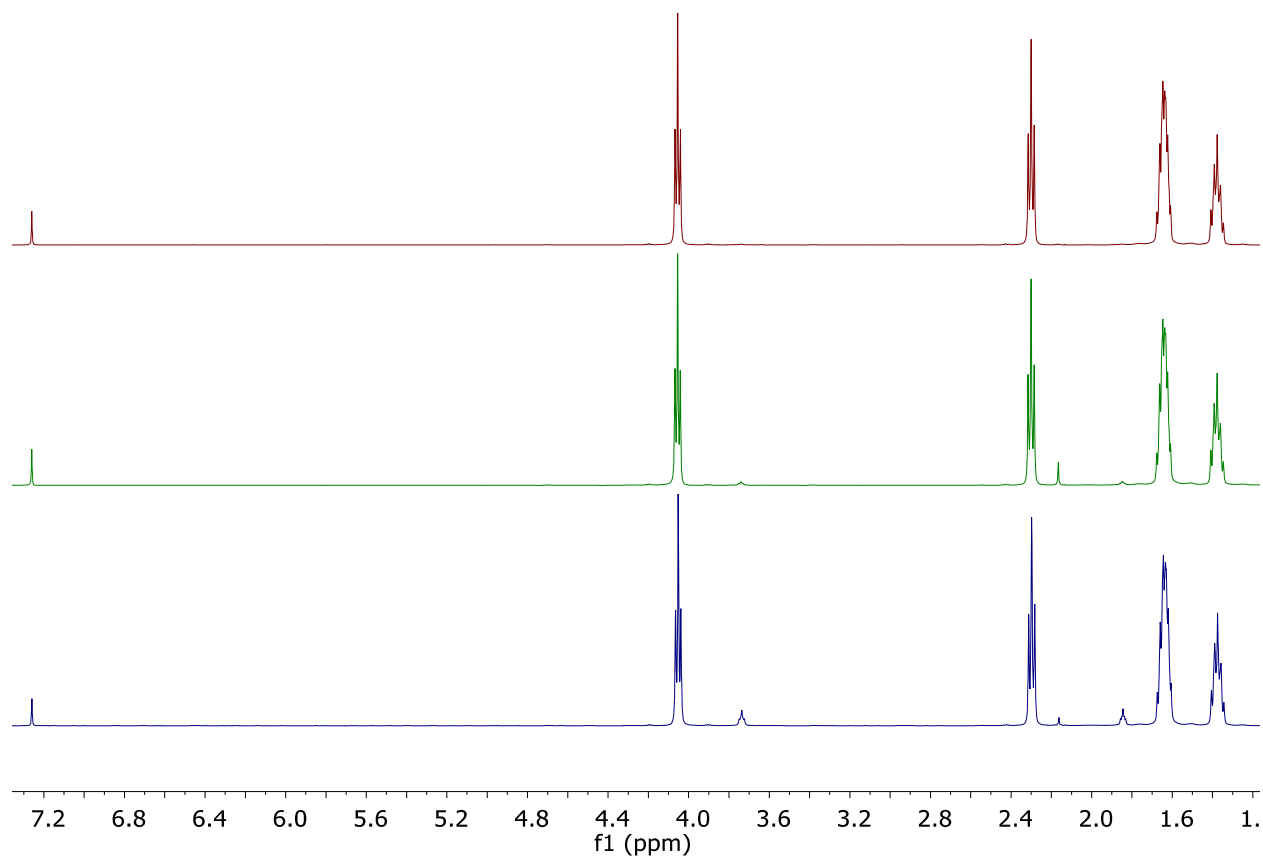

**Fig. S38**  $^1\text{H}$  NMR spectrum of PCL 550 equivalents generated by **6**/[Ph<sub>3</sub>C][B(C<sub>6</sub>F<sub>5</sub>)<sub>4</sub>] from **Table S2**, entry 3 in CDCl<sub>3</sub> at 298 K (2 h).

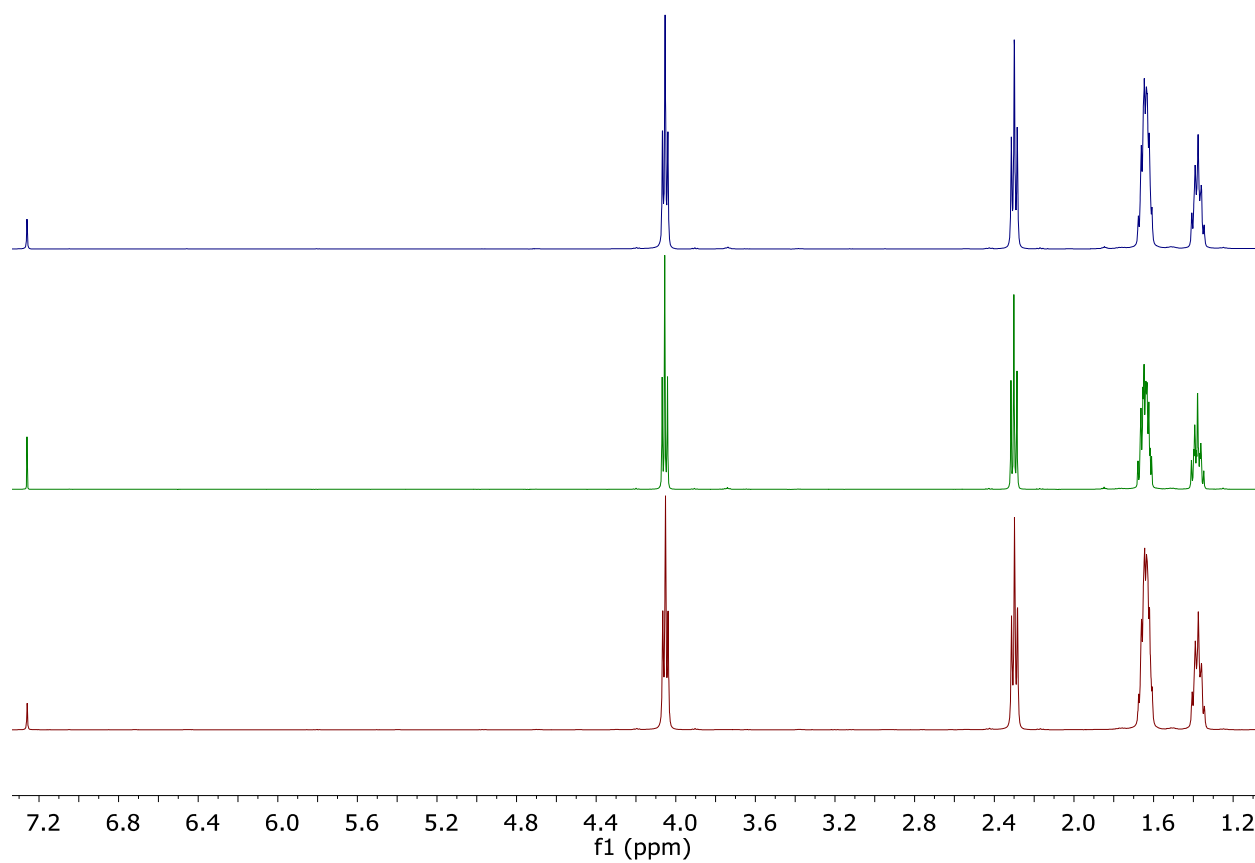

**Fig. S39**  $^1\text{H}$  NMR spectrum of PCL 800 equivalents generated by **6**/[Ph<sub>3</sub>C][B(C<sub>6</sub>F<sub>5</sub>)<sub>4</sub>] from **Table S2**, entry 4 in CDCl<sub>3</sub> at 298 K (2 h).

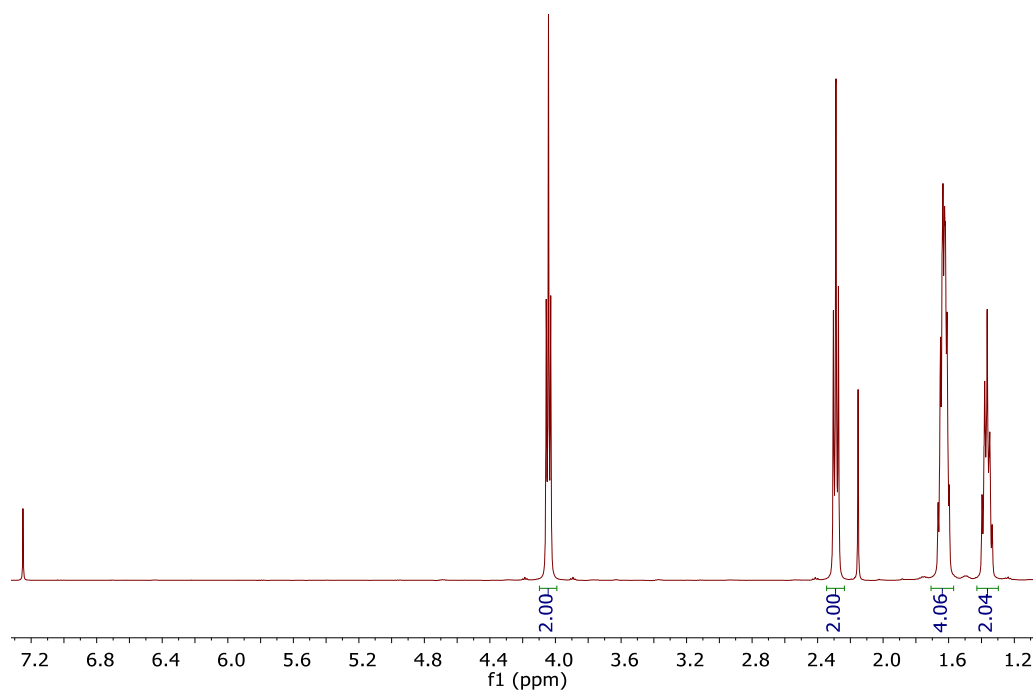

**Fig. S40**  $^1\text{H}$  NMR spectrum of PCL 800 equivalents generated by **6** from **Table S2**, entry 5 in  $\text{CDCl}_3$  at 298 K (No  $[\text{Ph}_3\text{C}][\text{B}(\text{C}_6\text{F}_5)_4]$  added) (10 min).

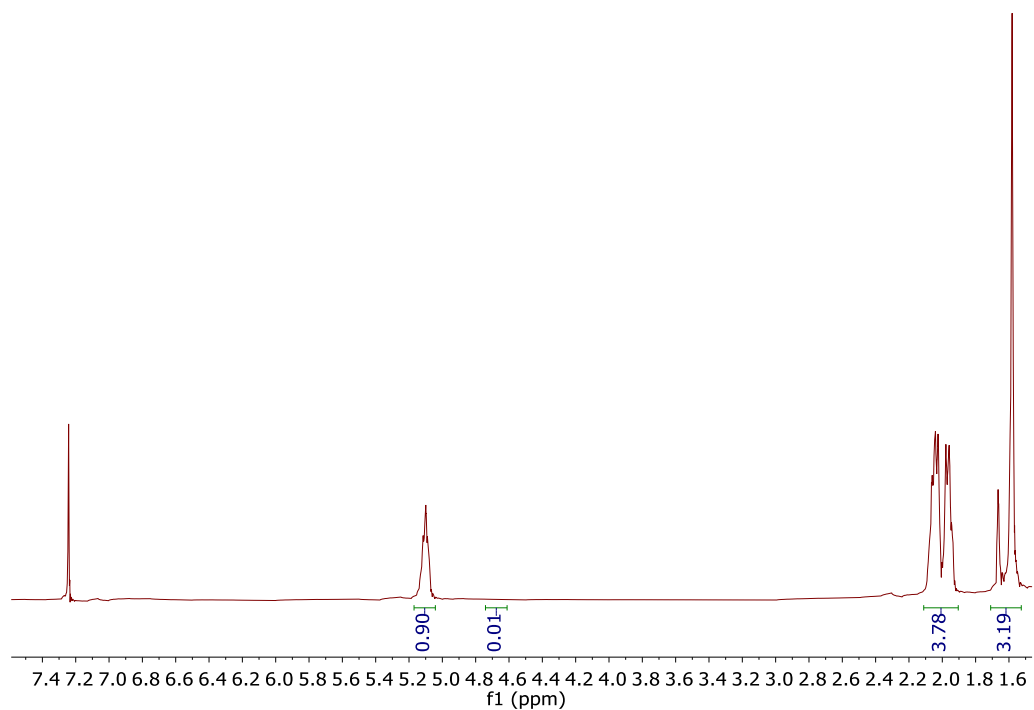

**Fig. S41**  $^1\text{H}$  NMR spectrum of PIP 50 equivalents generated by **6**/ $[\text{Ph}_3\text{C}][\text{B}(\text{C}_6\text{F}_5)_4]$  from **Table S3**, entry 1 in  $\text{CDCl}_3$  at 298 K (12 h).

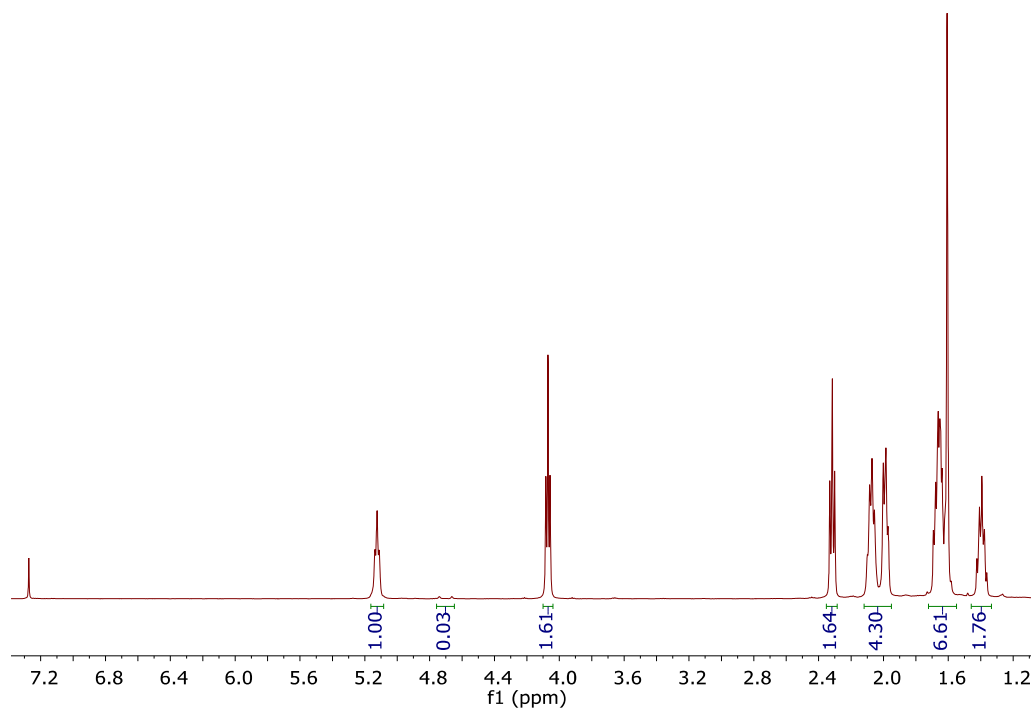

**Fig. S42**  $^1\text{H}$  NMR spectrum of PIP-*b*-PCL 50:50 equivalents generated by **6**/[Ph<sub>3</sub>C][B(C<sub>6</sub>F<sub>5</sub>)<sub>4</sub>] from **Table S3**, entry 2 in CDCl<sub>3</sub> at 298 K.

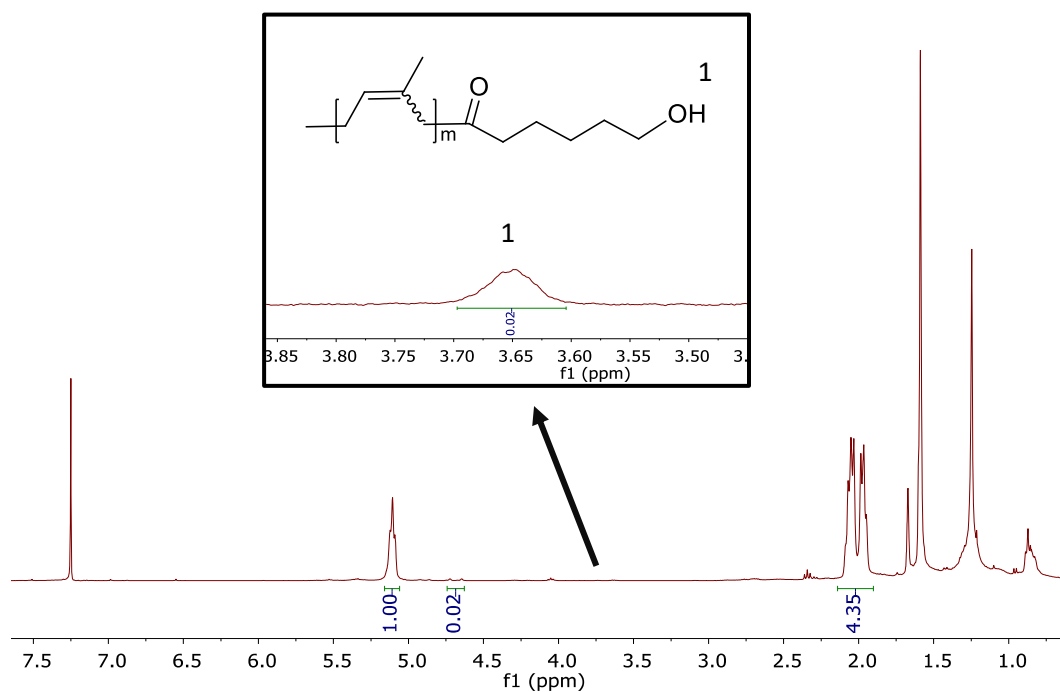

**Fig. S43**  $^1\text{H}$  NMR spectrum of recovered PIP 50 equivalents after hydrolysis of PIP-*b*-PCL 50:50 equivalents from **Table S3**, entry 3 in CDCl<sub>3</sub> at 298 K (12 h). Alcohol Peak at 3.65 ppm.



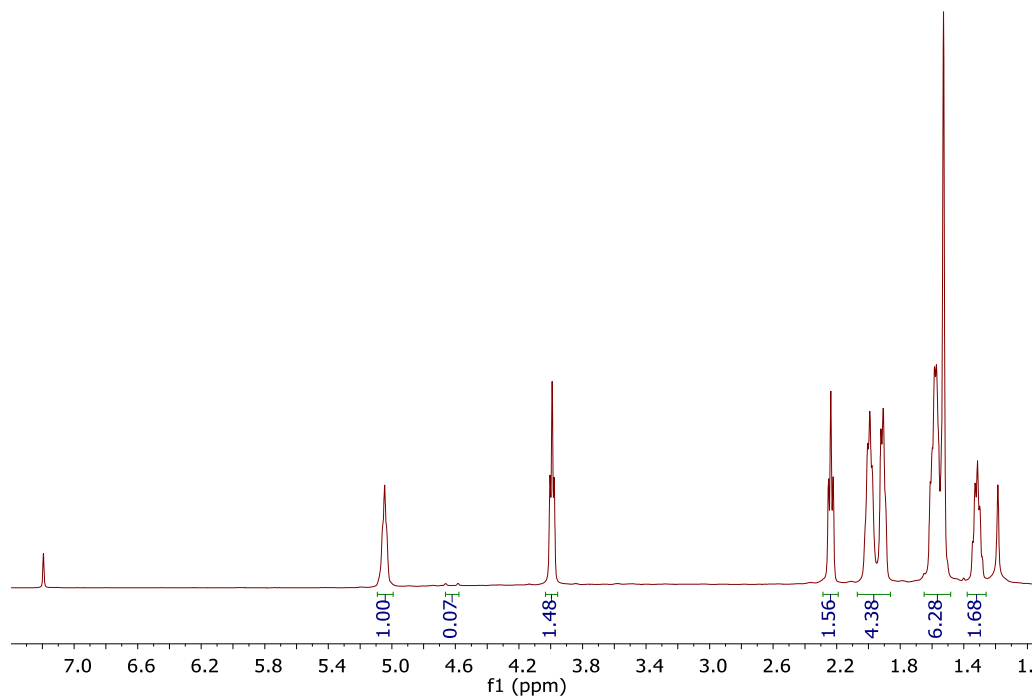

**Fig. S44** <sup>1</sup>H NMR spectrum of repolymerized PIP-*b*-PCL 50:50 equivalents generated by  $\text{Y}[\text{N}(\text{SiMe}_3)_2]_3$  from **Table S3**, entry 4 in  $\text{CDCl}_3$  at 298 K.

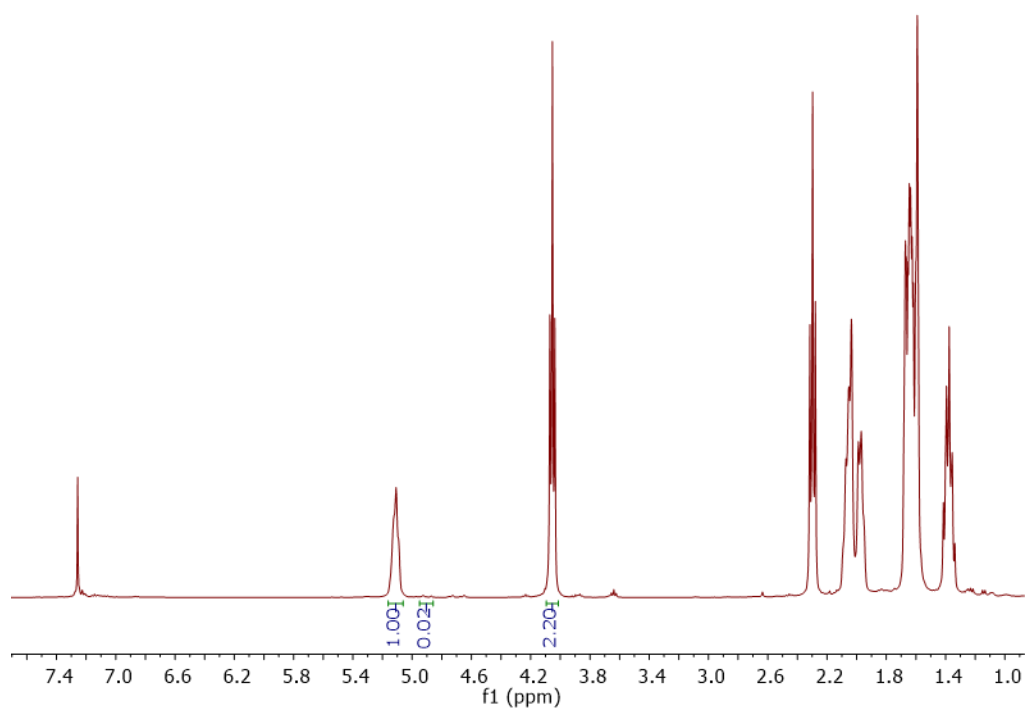

**Fig. S45** <sup>1</sup>H NMR spectrum of PIP-*b*-PCL 50:50 equivalents generated by **6**/[Ph<sub>3</sub>C][B(C<sub>6</sub>F<sub>5</sub>)<sub>4</sub>] (1 mL of toluene) from **Table S3**, entry 5 in  $\text{CDCl}_3$  at 298 K.

### 3.2 $^{13}\text{C}$ NMR Spectroscopy

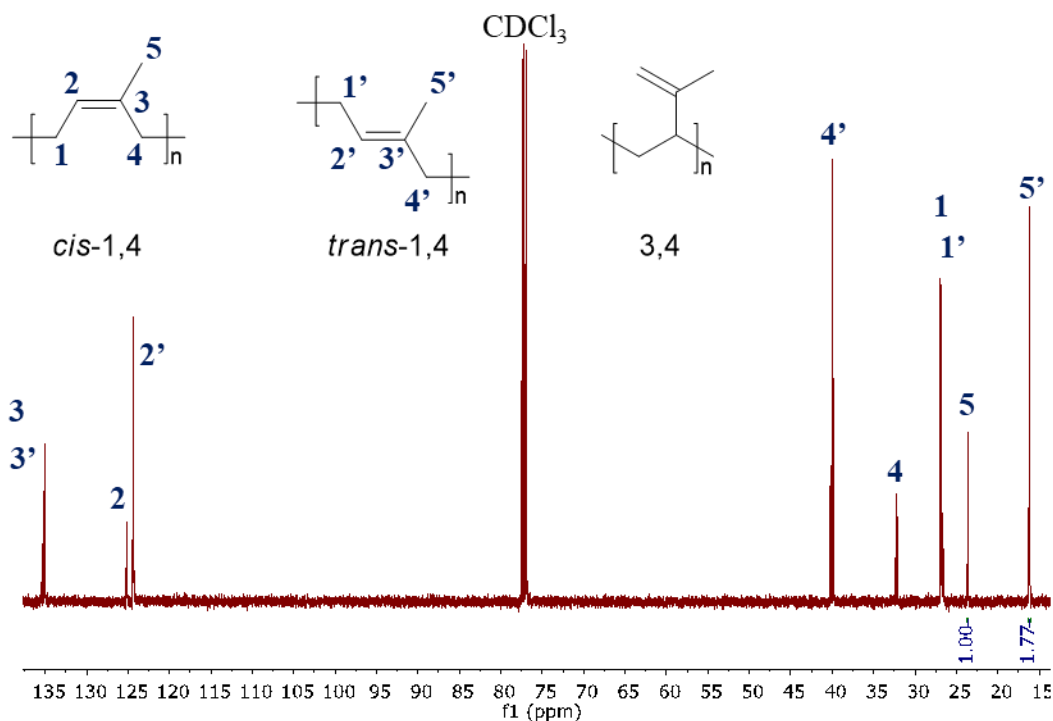

**Fig. S46**  $^{13}\text{C}$  NMR spectrum of PIP 800 equivalents generated by  $\mathbf{6}/[\text{Ph}_3\text{C}][\text{B}(\text{C}_6\text{F}_5)_4]$  from **Table 1**, entry 1a in  $\text{CDCl}_3$  at 298 K (12 h). Representative peak assignment for PIP. *Cis*-1,4-PIP versus *trans*-1,4-PIP calculated based on peaks 5 and 5'.

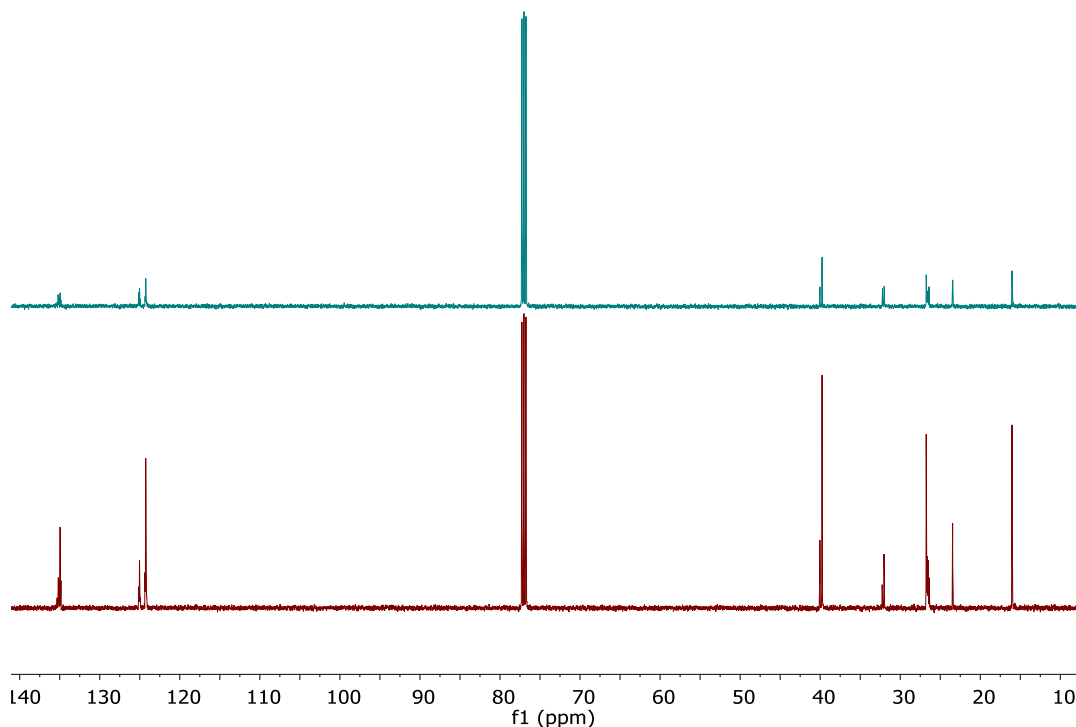

**Fig. S47**  $^{13}\text{C}$  NMR spectrum of PIP equivalents generated by  $\mathbf{6}/[\text{Ph}_3\text{C}][\text{B}(\text{C}_6\text{F}_5)_4]$  from **Table 1**, entry 1(b, c) in  $\text{CDCl}_3$  at 298 K (12 h).

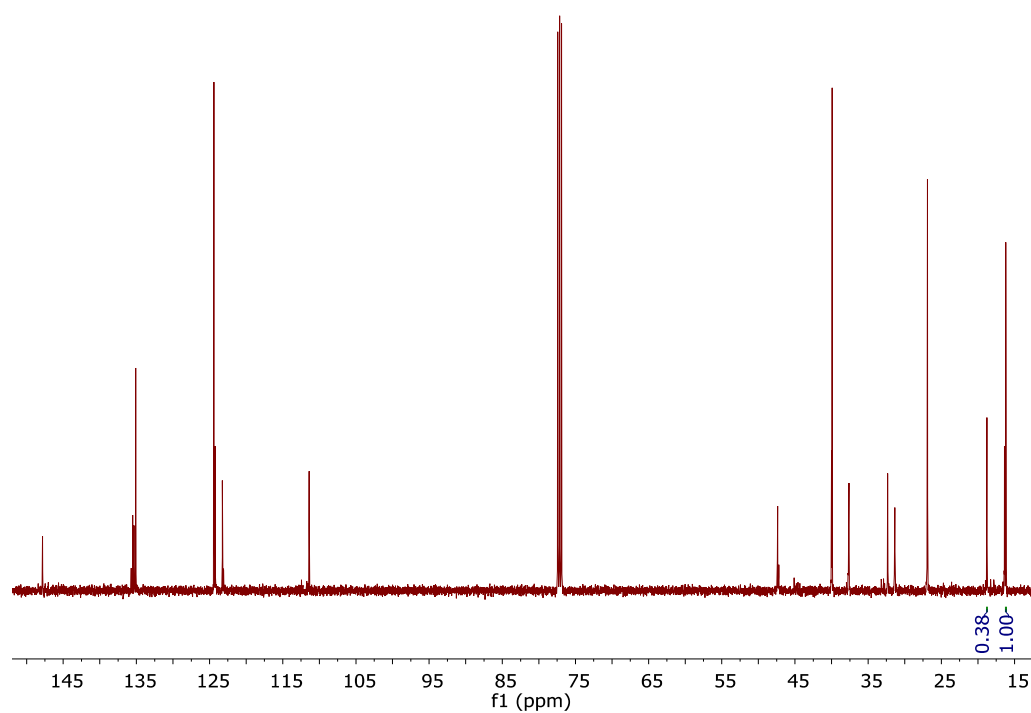

**Fig. S48**  $^{13}\text{C}$  NMR spectrum of PIP 800 equivalents generated by **8**/[Ph<sub>3</sub>C][B(C<sub>6</sub>F<sub>5</sub>)<sub>4</sub>] from **Table 1**, entry 3 in CDCl<sub>3</sub> at 298 K (12 h).

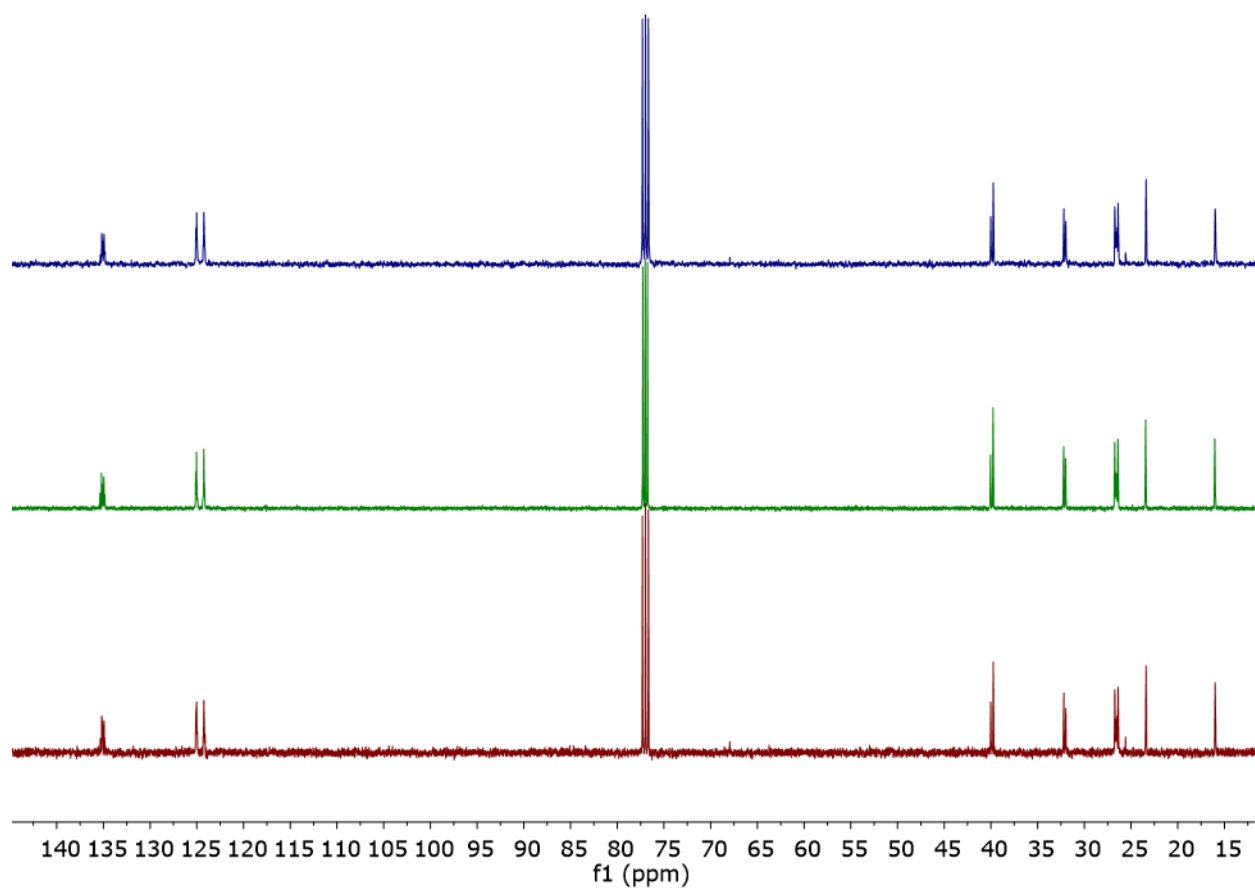

**Fig. S49**  $^{13}\text{C}$  NMR spectrum of PIP 800 equivalents generated by **6**/[ $\text{Ph}_3\text{C}$ ][ $\text{B}(\text{C}_6\text{F}_5)_4$ ] from **Table 1**, entry 4 in  $\text{CDCl}_3$  at 298 K (24 h).

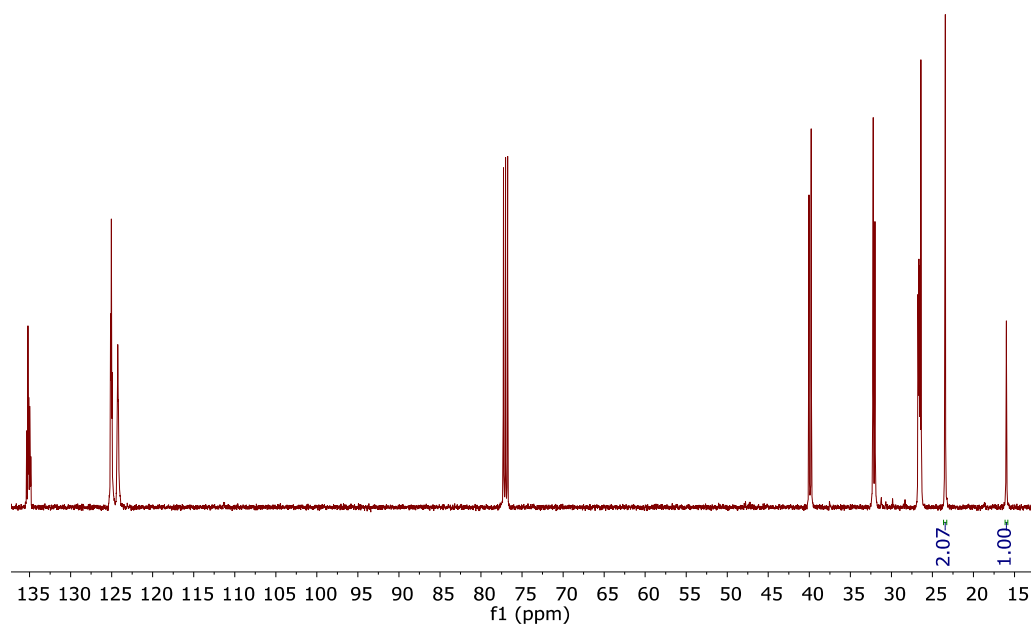

**Fig. S50** <sup>13</sup>C NMR spectrum of PIP 800 equivalents generated by **6**/[Ph<sub>3</sub>C][B(C<sub>6</sub>F<sub>5</sub>)<sub>4</sub>] from **Table 1**, entry 5 in CDCl<sub>3</sub> at 298 K (30 min).

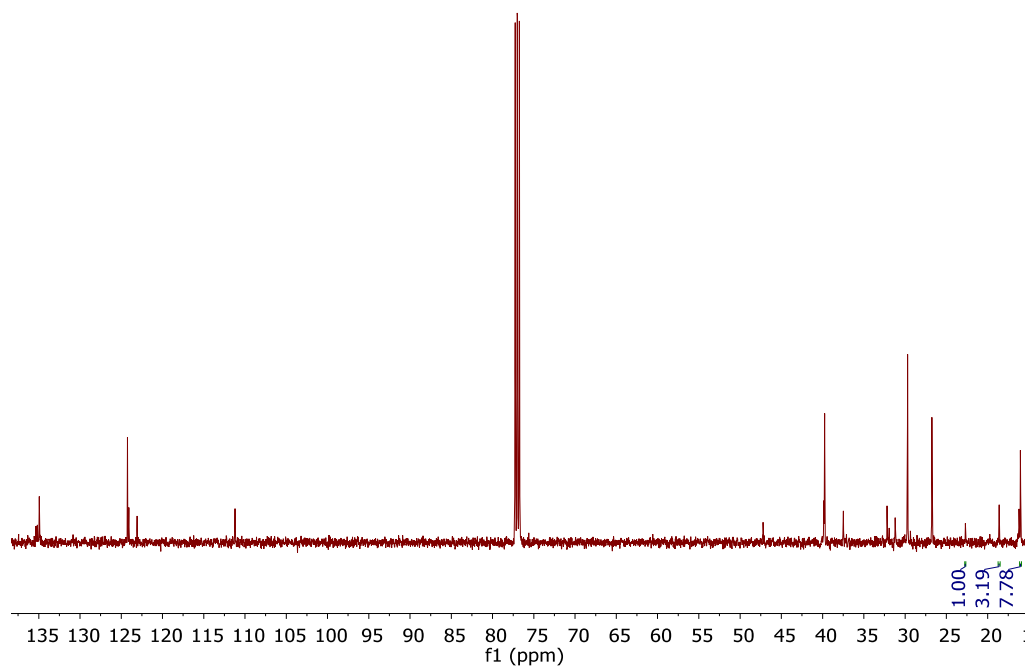

**Fig. S51** <sup>13</sup>C NMR spectrum of PIP 800 equivalents generated by **8**/[Ph<sub>3</sub>C][B(C<sub>6</sub>F<sub>5</sub>)<sub>4</sub>] from **Table 1**, entry 6 in CDCl<sub>3</sub> at 298 K (30 min).

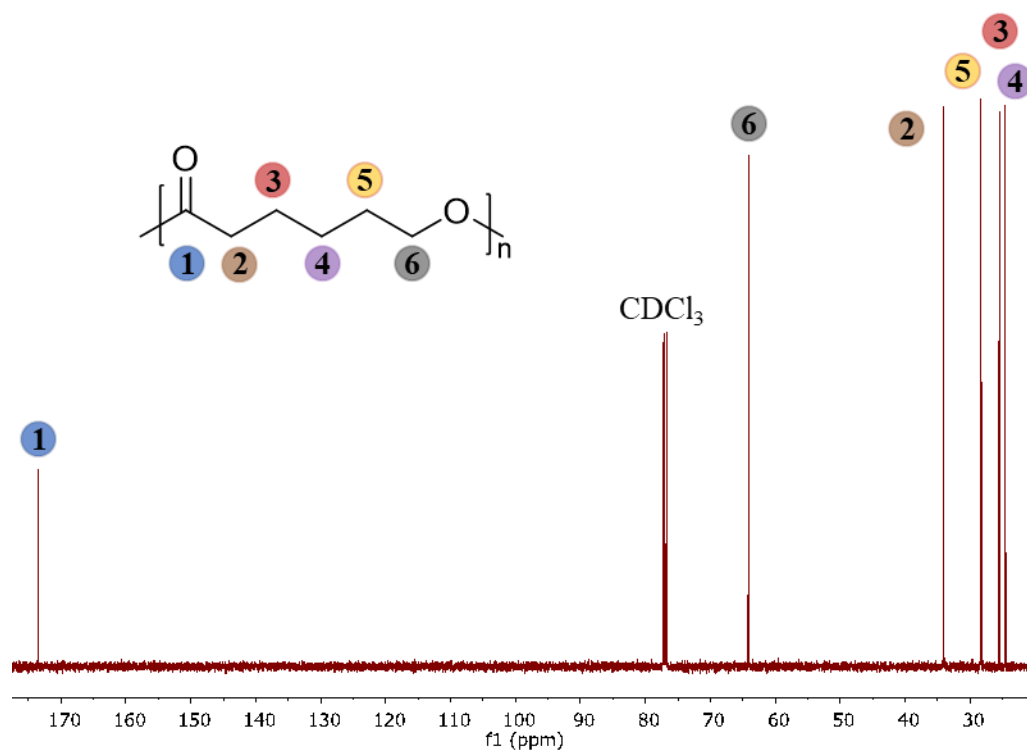

**Fig. S52**  $^{13}\text{C}$  NMR spectrum of PCL 300 equivalents generated by **6**/[Ph<sub>3</sub>C][B(C<sub>6</sub>F<sub>5</sub>)<sub>4</sub>] from **Table 1**, entry 7 in CDCl<sub>3</sub> at 298 K (10 min). Representative peak assignment for PCL.

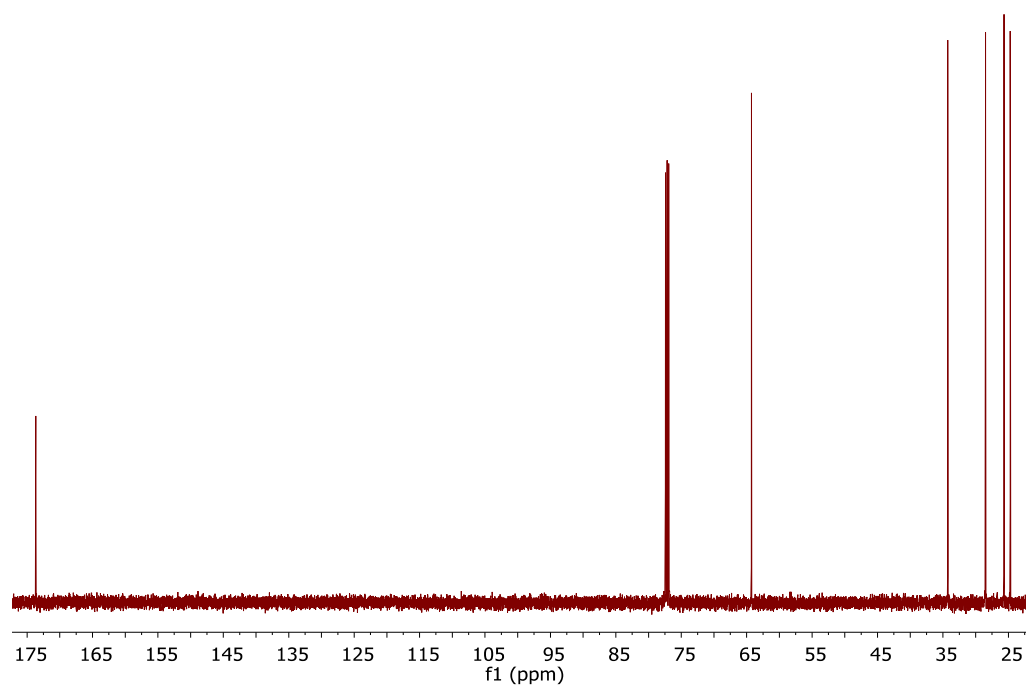

**Fig. S53**  $^{13}\text{C}$  NMR spectrum of PCL 300 equivalents generated by **8**/[Ph<sub>3</sub>C][B(C<sub>6</sub>F<sub>5</sub>)<sub>4</sub>] from **Table 1**, entry 8 in CDCl<sub>3</sub> at 298 K (10 min).

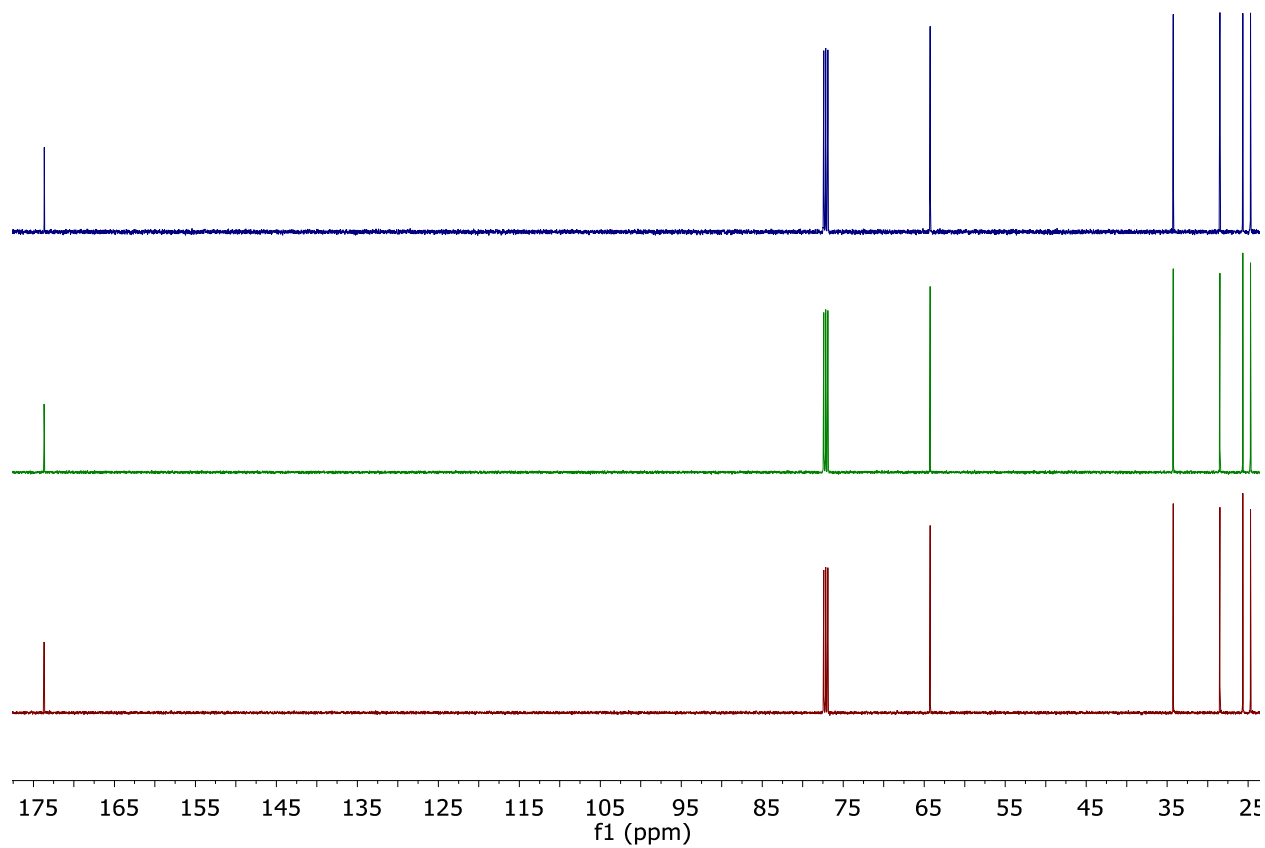

**Fig. S54**  $^{13}\text{C}$  NMR spectrum of PCL 300 equivalents generated by **6**/[Ph<sub>3</sub>C][B(C<sub>6</sub>F<sub>5</sub>)<sub>4</sub>] from **Table 1**, entry 9 in CDCl<sub>3</sub> at 298 K (2 h).

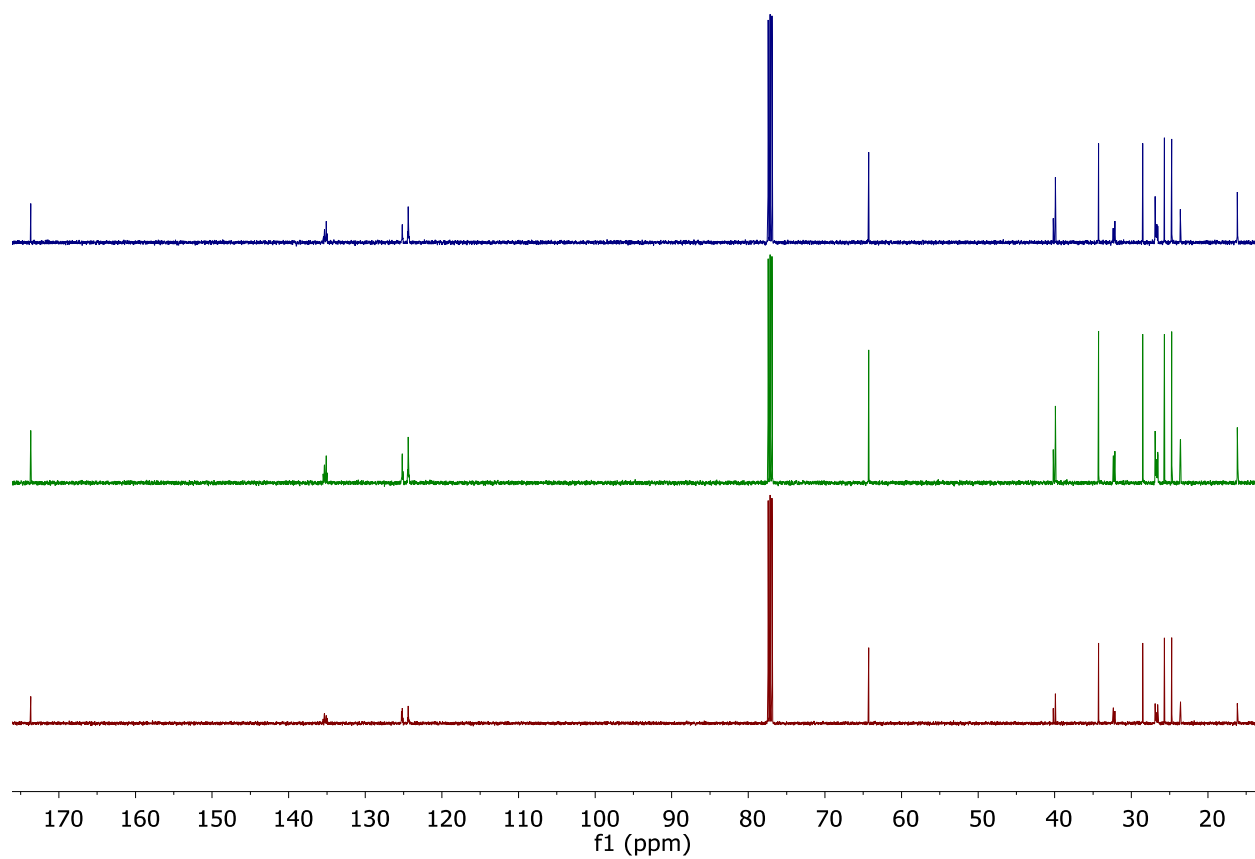

**Fig. S55**  $^{13}\text{C}$  NMR spectrum of PIP-*b*-PCL 800:300 equivalents generated by **6**/[Ph<sub>3</sub>C][B(C<sub>6</sub>F<sub>5</sub>)<sub>4</sub>] from **Table 2**, entry 1 in CDCl<sub>3</sub> at 298 K.



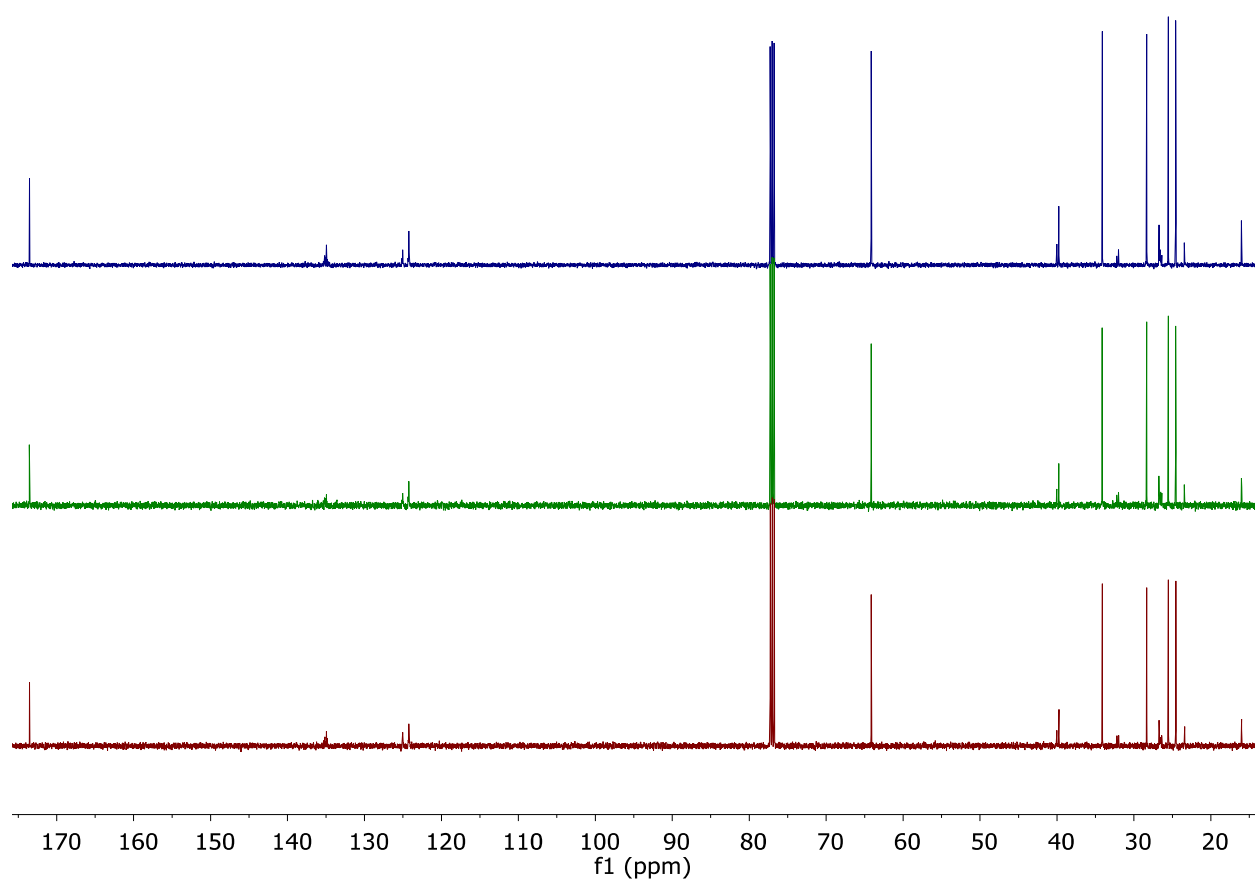

**Fig. S56**  $^{13}\text{C}$  NMR spectrum of PIP-*b*-PCL 550:550 equivalents generated by **6**/[ $\text{Ph}_3\text{C}$ ][ $\text{B}(\text{C}_6\text{F}_5)_4$ ] from **Table 2**, entry 2 in  $\text{CDCl}_3$  at 298 K.

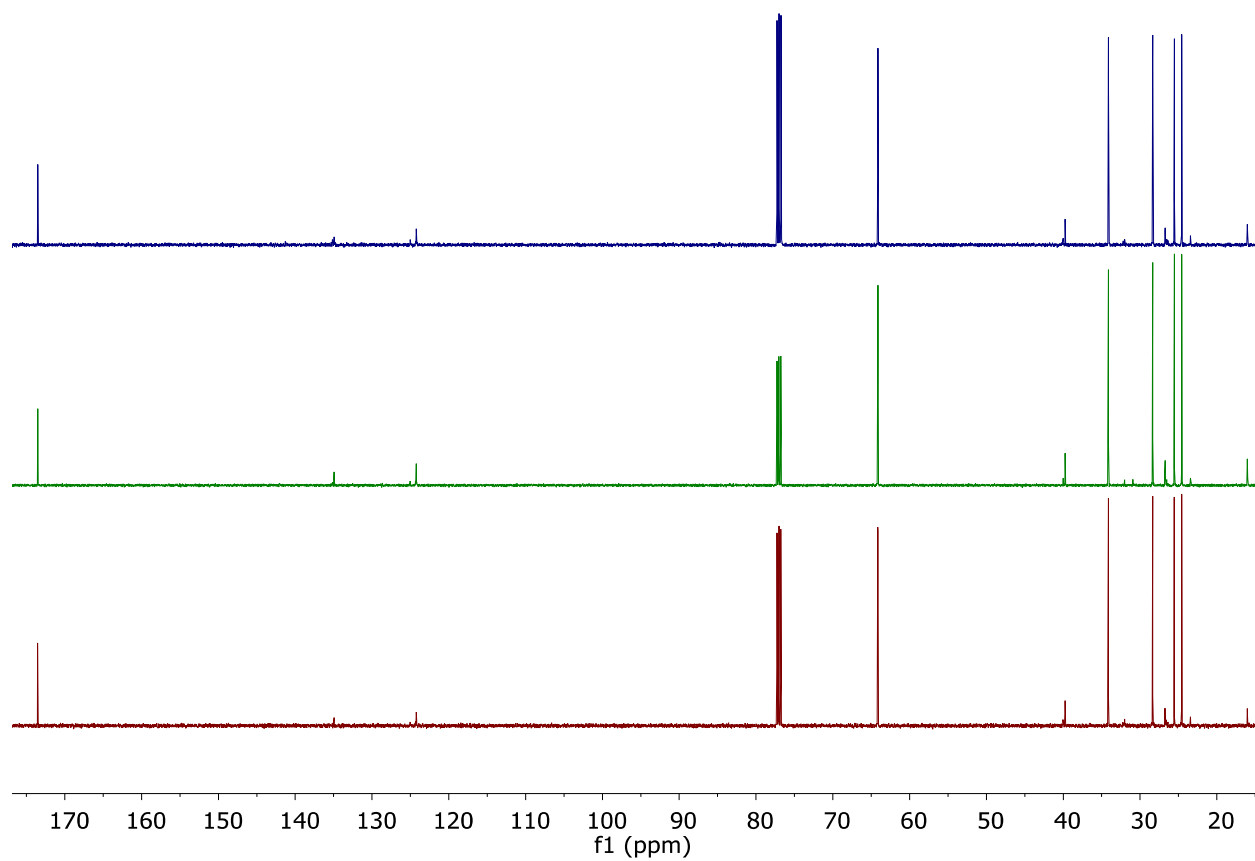

**Fig. S57**  $^{13}\text{C}$  NMR spectrum of PIP-*b*-PCL 300:800 equivalents generated by **6**/[Ph<sub>3</sub>C][B(C<sub>6</sub>F<sub>5</sub>)<sub>4</sub>] from **Table 2**, entry 3 in CDCl<sub>3</sub> at 298 K.

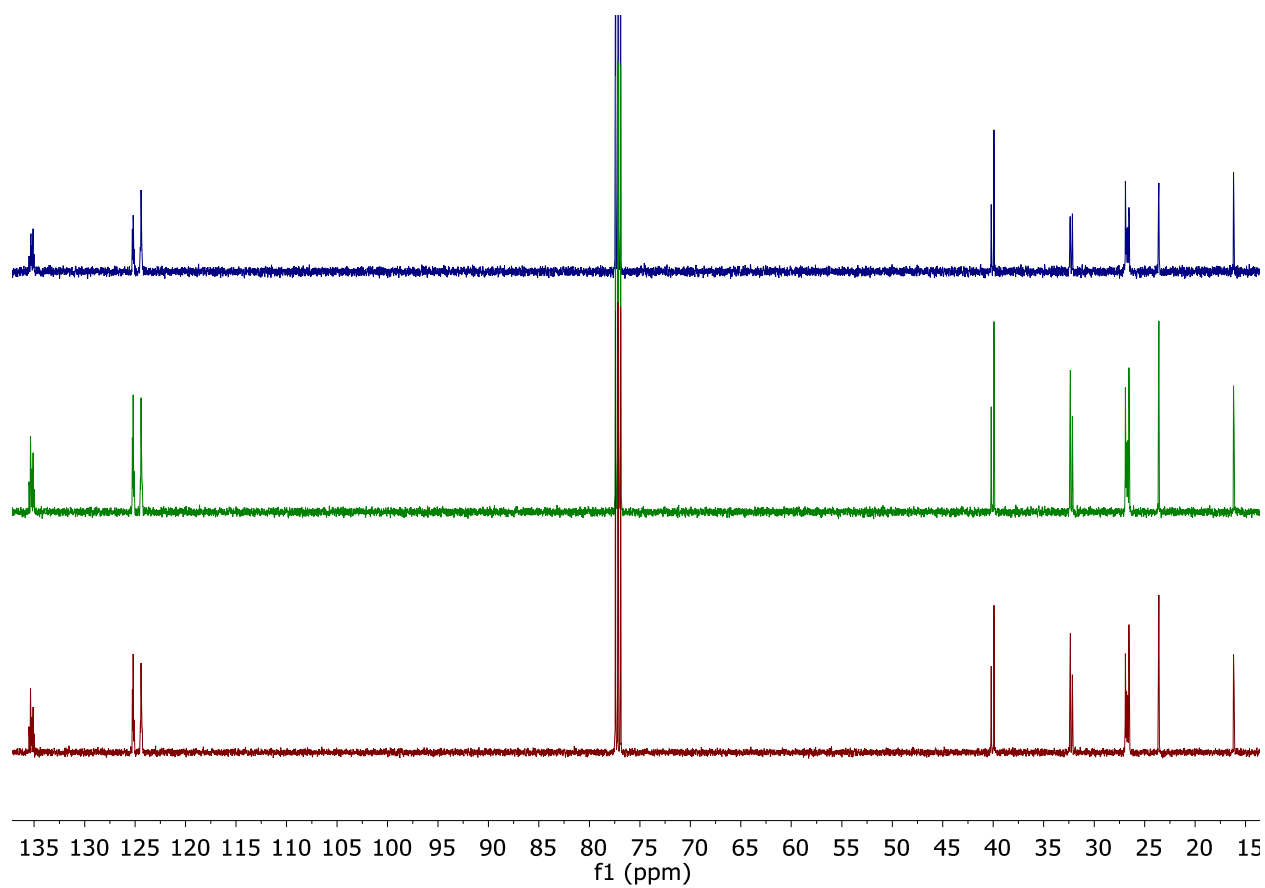

**Fig. S58**  $^{13}\text{C}$  NMR spectrum of PIP 800 equivalents generated by **6**/[Ph<sub>3</sub>C][B(C<sub>6</sub>F<sub>5</sub>)<sub>4</sub>] from **Table 3**, entry 1 in CDCl<sub>3</sub> at 298 K (IP addition time 0 min).

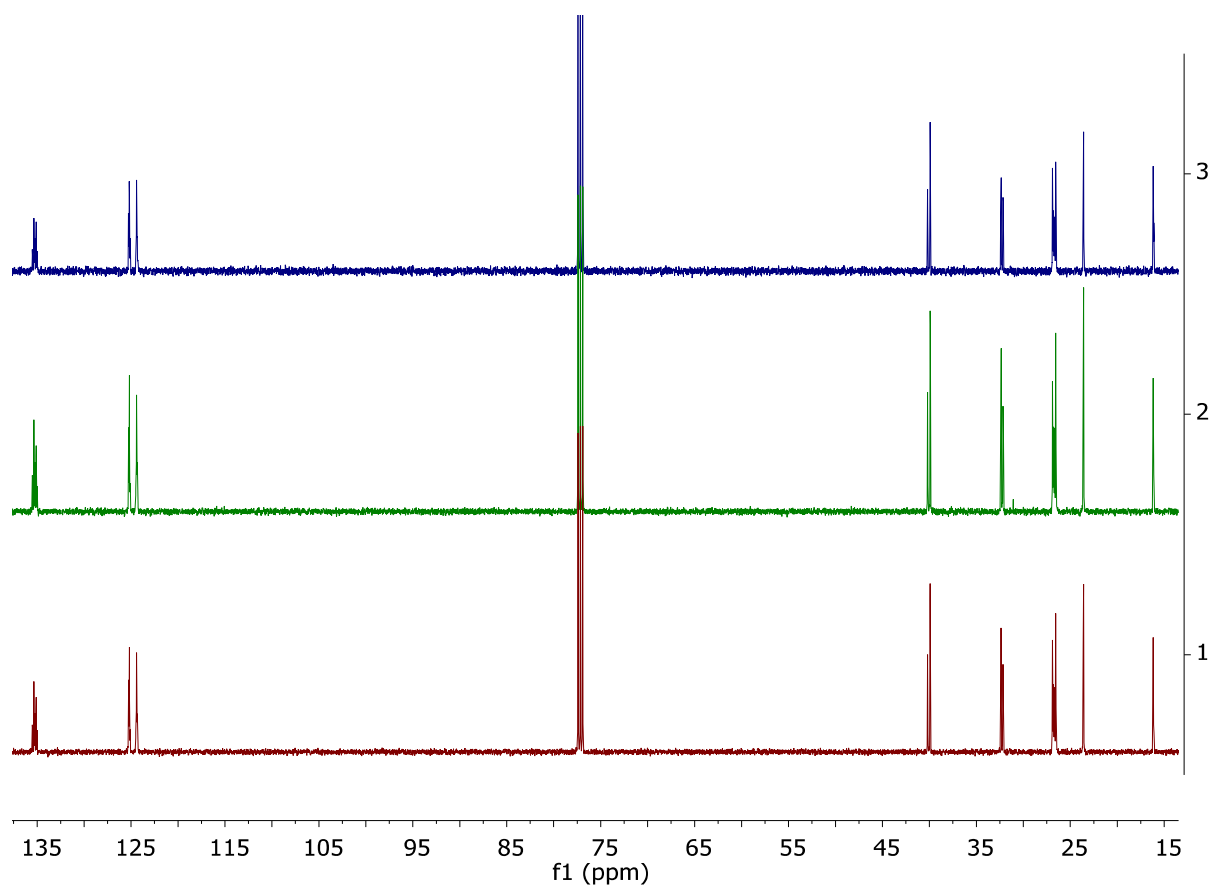

**Fig. S59**  $^{13}\text{C}$  NMR spectrum of PIP 800 equivalents generated by **6**/[Ph<sub>3</sub>C][B(C<sub>6</sub>F<sub>5</sub>)<sub>4</sub>] from **Table 3**, entry 2 in CDCl<sub>3</sub> at 298 K (IP addition time 30 min).

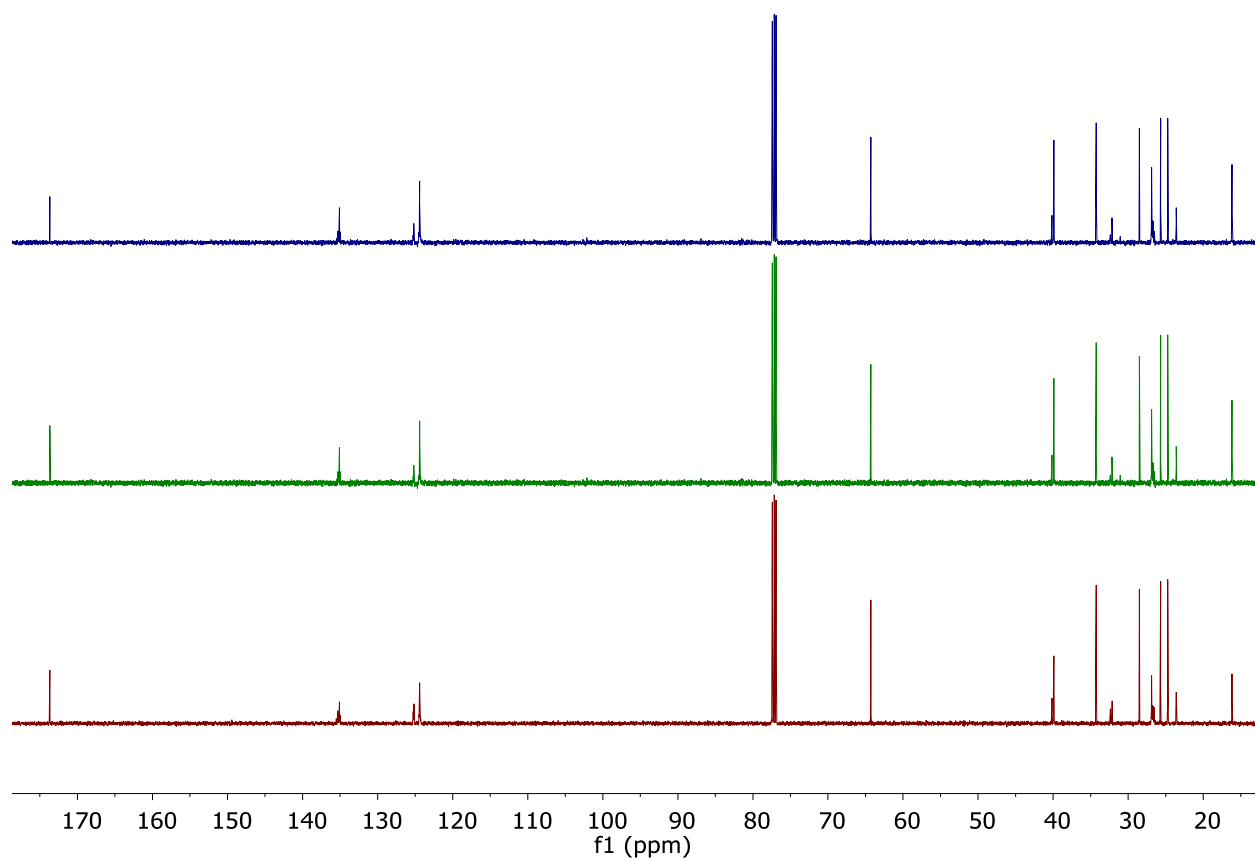

**Fig. S60**  $^{13}\text{C}$  NMR spectrum of PIP-*b*-PCL 800:300 equivalents generated by **6** and 0.5 equivalents of  $[\text{Ph}_3\text{C}][\text{B}(\text{C}_6\text{F}_5)_4]$  from **Table 3**, entry 3 in  $\text{CDCl}_3$  at 298 K.

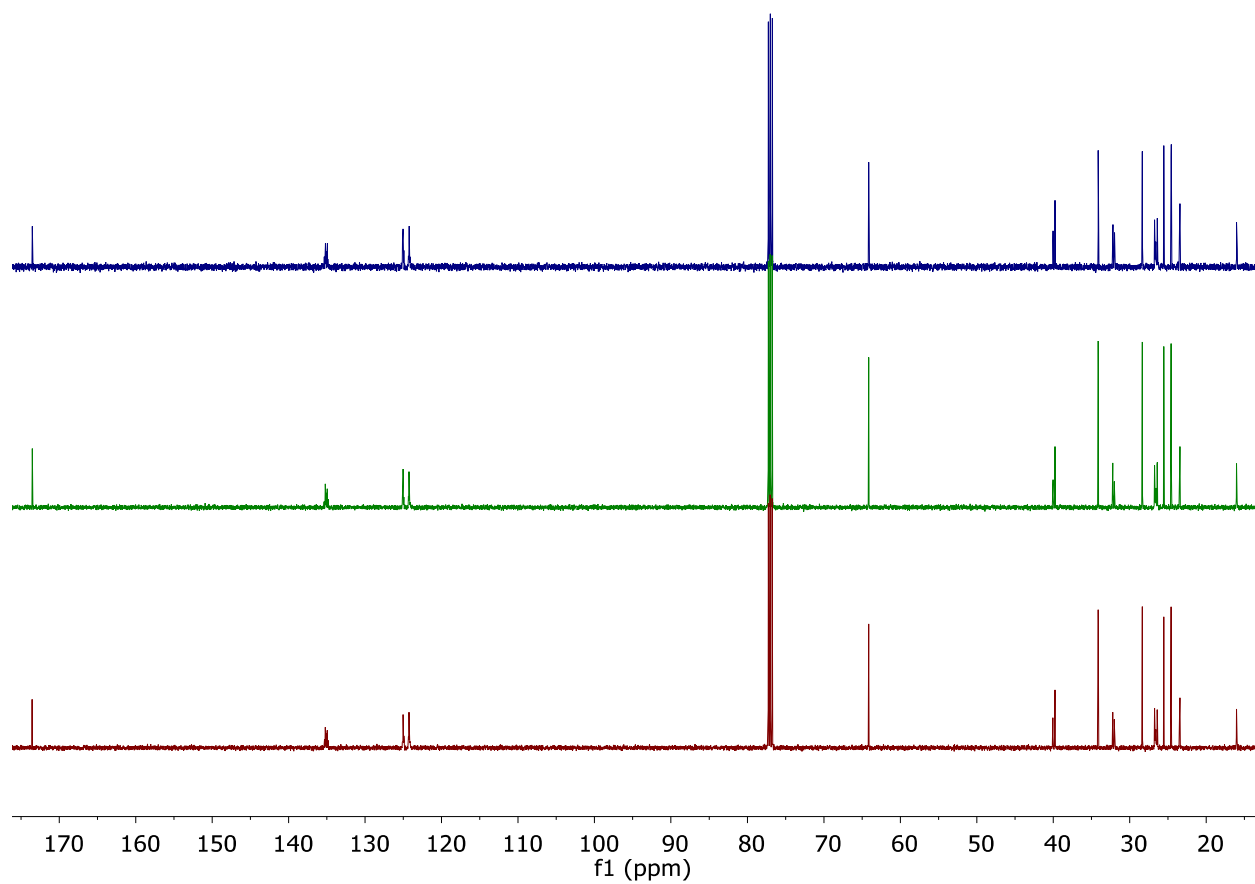

**Fig. S61**  $^{13}\text{C}$  NMR spectrum of PIP-*b*-PCL 800:300 equivalents generated by **6** and 1.5 equivalents of  $[\text{Ph}_3\text{C}][\text{B}(\text{C}_6\text{F}_5)_4]$  from **Table 3**, entry 4 in  $\text{CDCl}_3$  at 298 K.

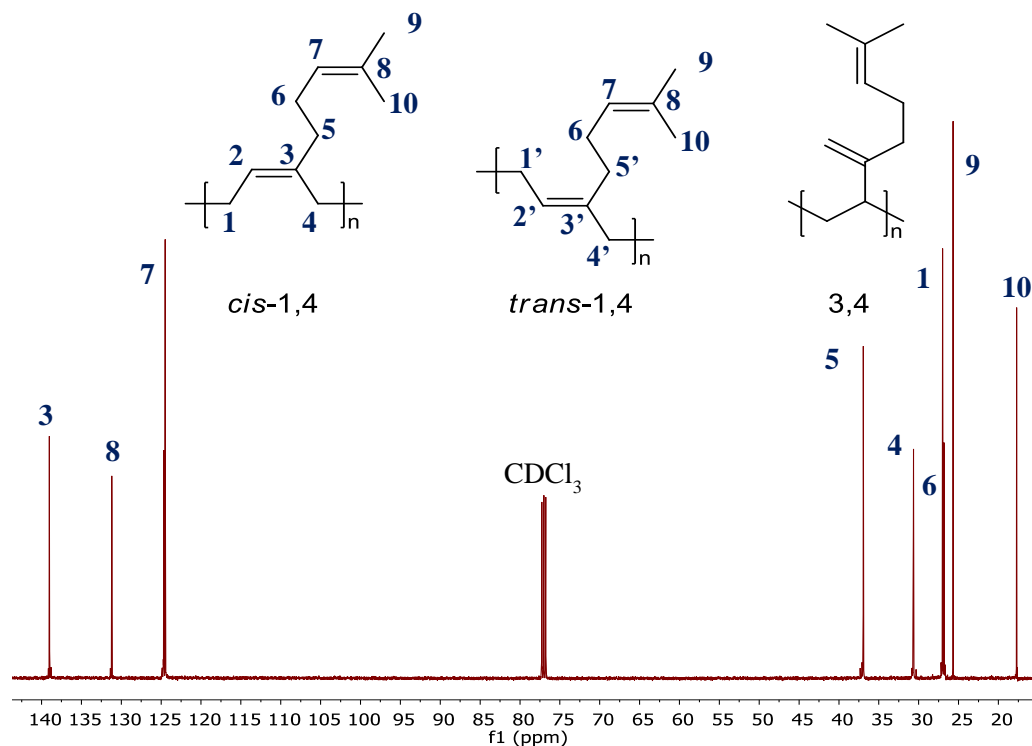

**Fig. S62**  $^{13}\text{C}$  NMR spectrum of PMyr 800 equivalents generated by **6**/[Ph<sub>3</sub>C][B(C<sub>6</sub>F<sub>5</sub>)<sub>4</sub>] from Table 4, entry 1 in CDCl<sub>3</sub> at 298 K (30 min). Representative peak assignment for PMyr.

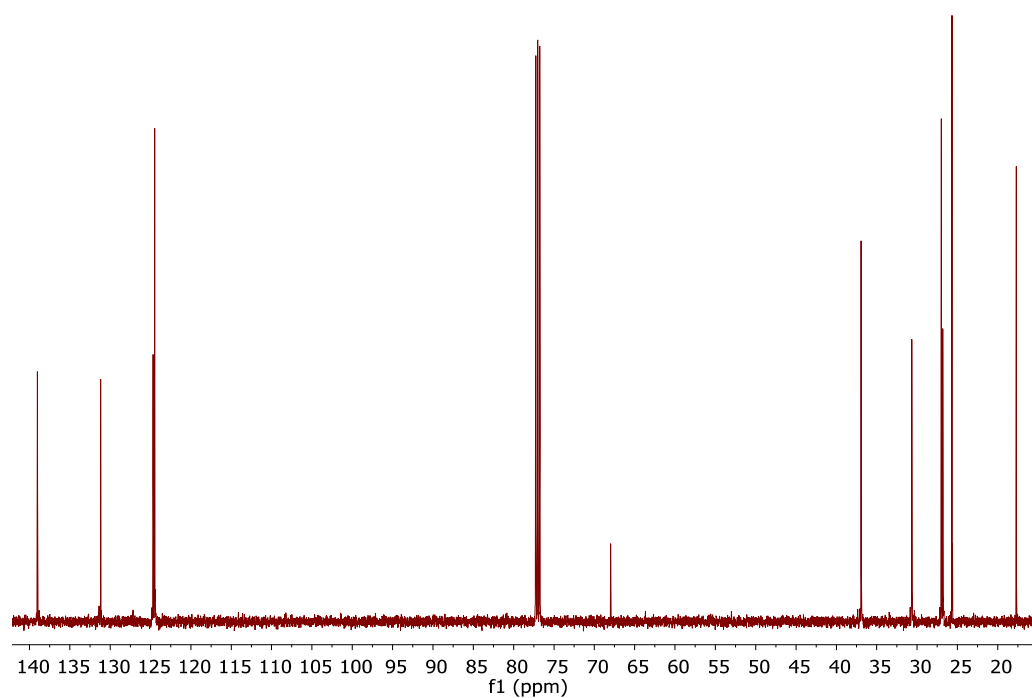

**Fig. S63**  $^{13}\text{C}$  NMR spectrum of PMyr 800 equivalents generated by **6**/[Ph<sub>3</sub>C][B(C<sub>6</sub>F<sub>5</sub>)<sub>4</sub>] from Table 4, entry 2 in CDCl<sub>3</sub> at 298 K (90 min).

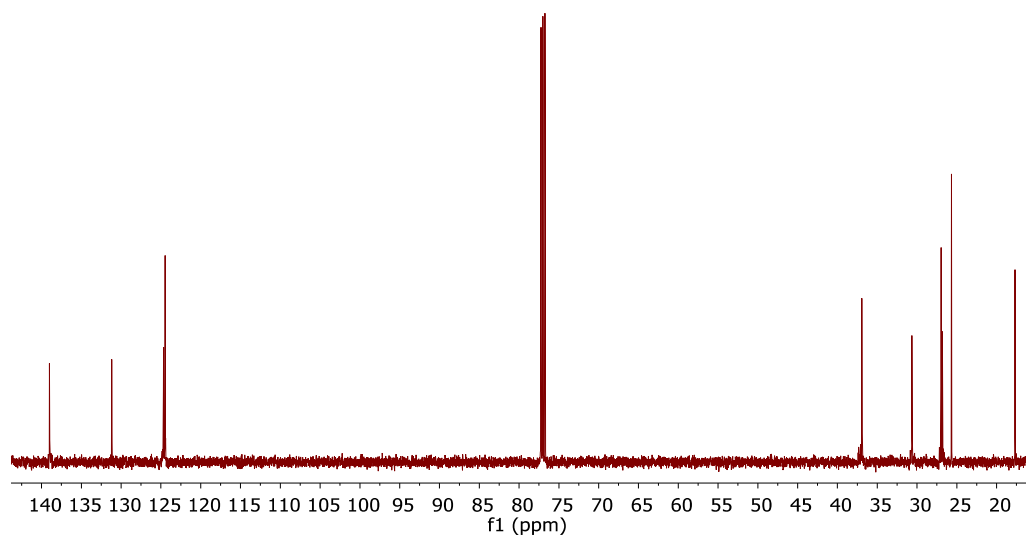

**Fig. S64**  $^{13}\text{C}$  NMR spectrum of PMyr 800 equivalents generated by **6**/[Ph<sub>3</sub>C][B(C<sub>6</sub>F<sub>5</sub>)<sub>4</sub>] from **Table 4**, entry 3 in CDCl<sub>3</sub> at 298 K (3 h).

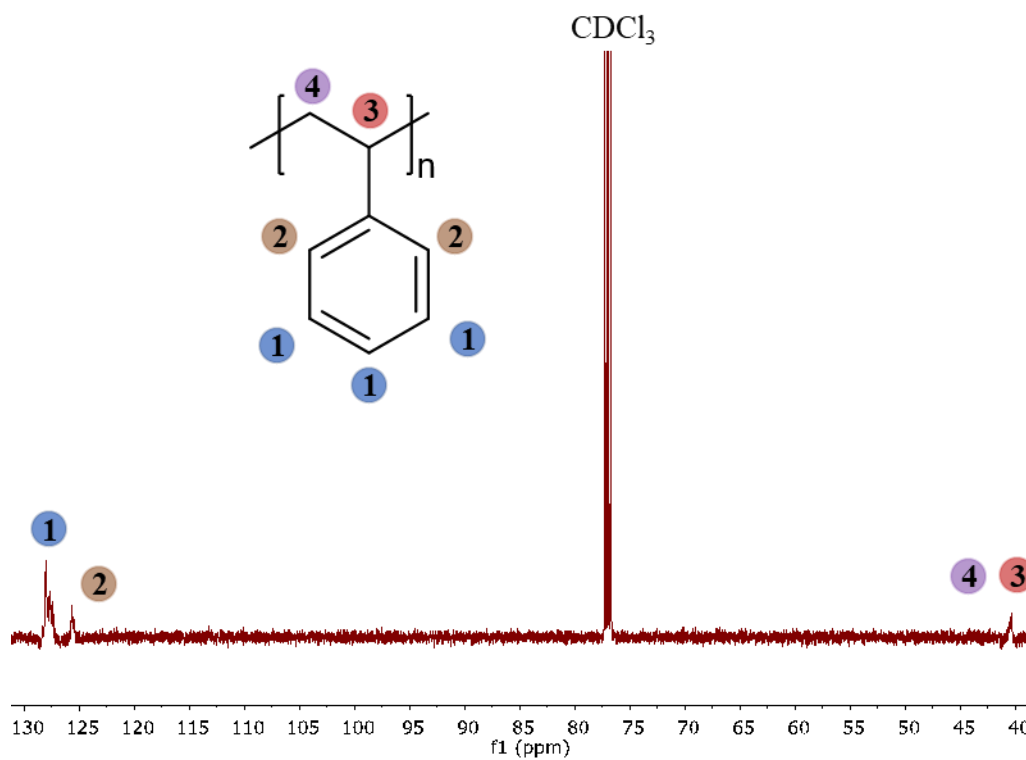

**Fig. S65**  $^{13}\text{C}$  NMR spectrum of PS 800 equivalents generated by **6**/[Ph<sub>3</sub>C][B(C<sub>6</sub>F<sub>5</sub>)<sub>4</sub>] from **Table 4**, entry 4 in CDCl<sub>3</sub> at 298 K (30 min). Representative peak assignment for PS.



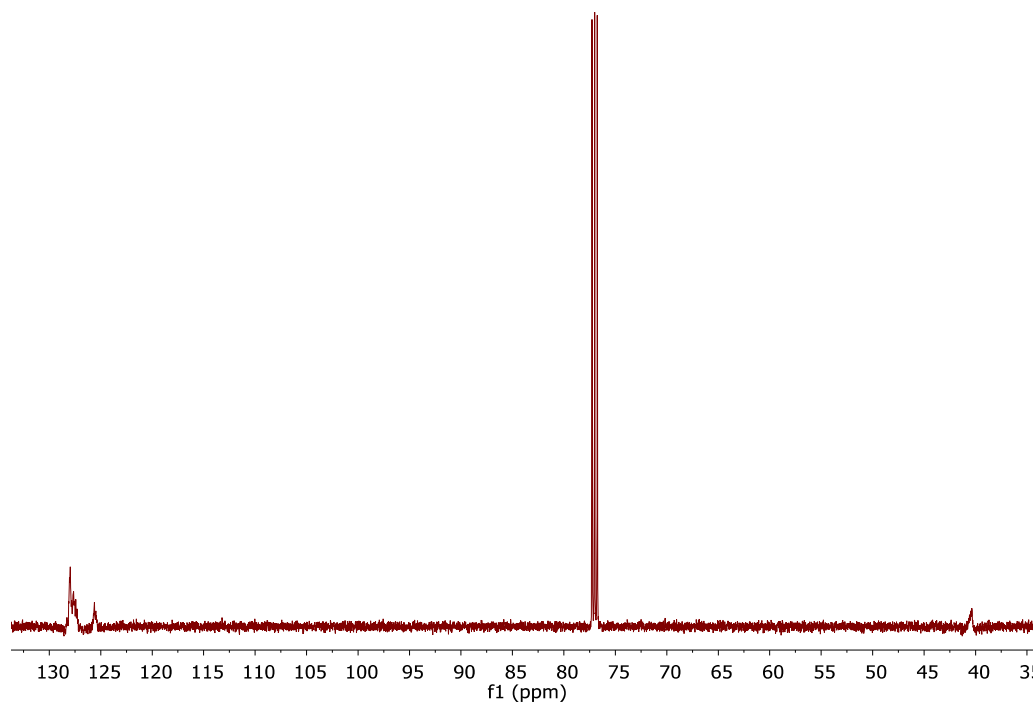

**Fig. S66**  $^{13}\text{C}$  NMR spectrum of PS 800 equivalents generated by **6**/[Ph<sub>3</sub>C][B(C<sub>6</sub>F<sub>5</sub>)<sub>4</sub>] from **Table 4**, entry 5 in CDCl<sub>3</sub> at 298 K (20 h).

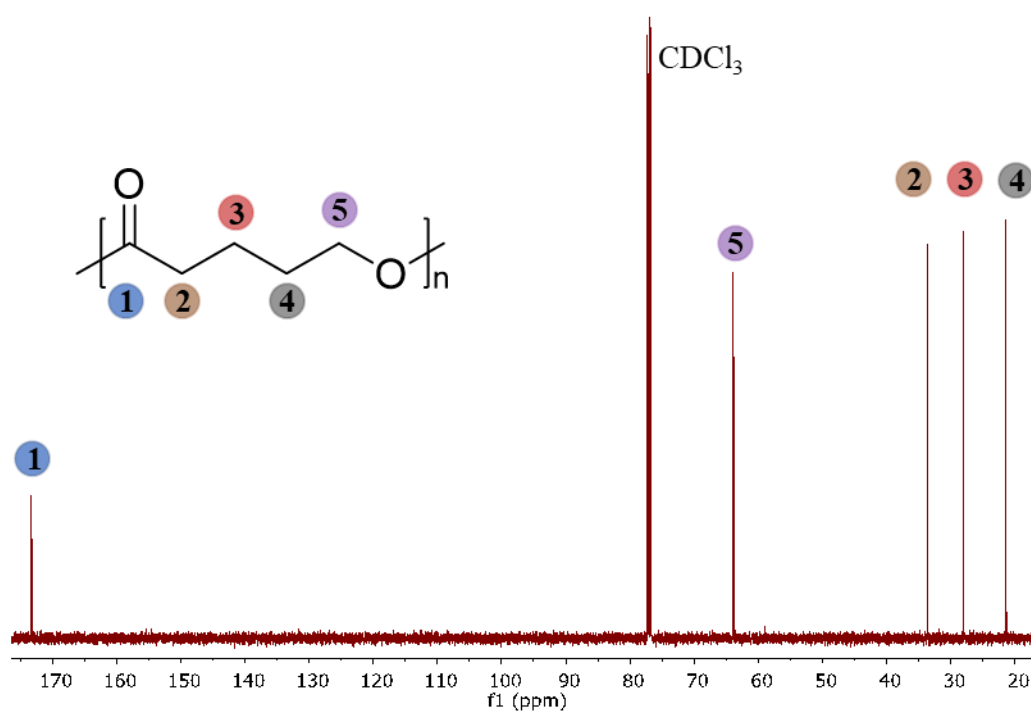

**Fig. S67**  $^{13}\text{C}$  NMR spectrum of PVL 300 equivalents generated by **6**/[Ph<sub>3</sub>C][B(C<sub>6</sub>F<sub>5</sub>)<sub>4</sub>] from **Table 4**, entry 6 in CDCl<sub>3</sub> at 298 K (10 min). Representative peak assignment for PVL.

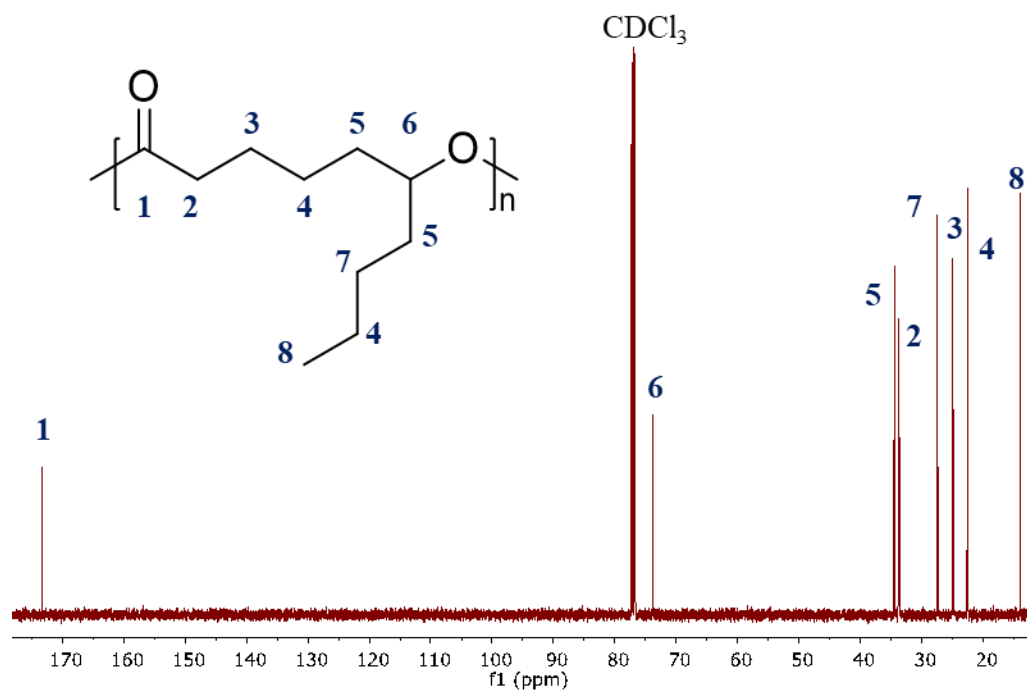

**Fig. S68** <sup>13</sup>C NMR spectrum of PDL 300 equivalents generated by **6**/[Ph<sub>3</sub>C][B(C<sub>6</sub>F<sub>5</sub>)<sub>4</sub>] from **Table 4**, entry 7 in CDCl<sub>3</sub> at 298 K (30 min). Representative peak assignment for PDL.

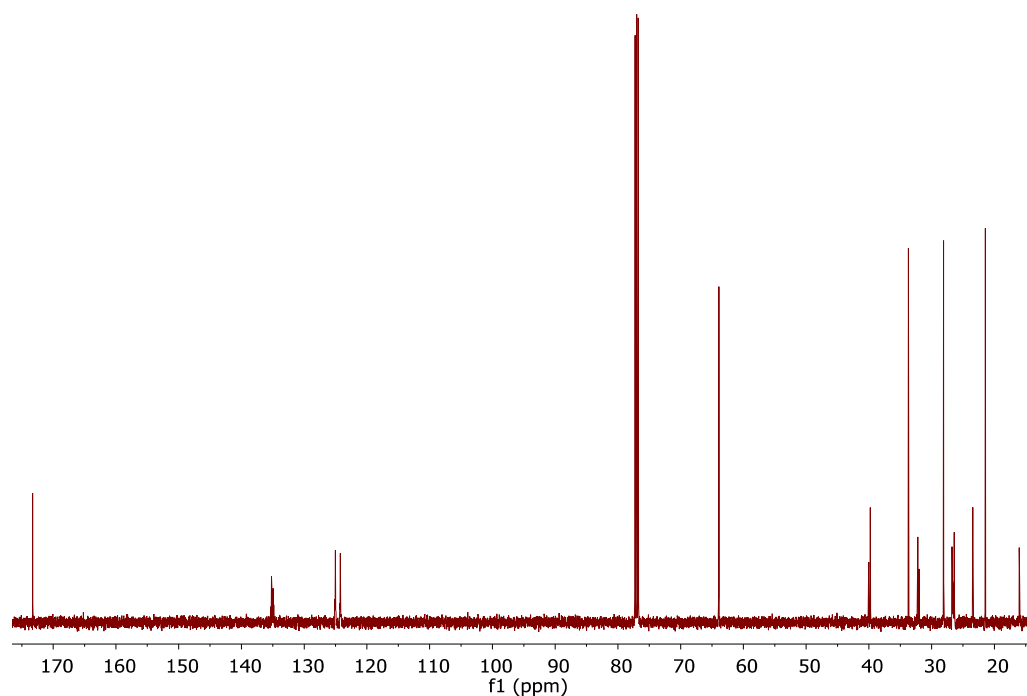

**Fig. S69** <sup>13</sup>C NMR spectrum of PIP-*b*-PVL 800:300 equivalents generated by **6**/[Ph<sub>3</sub>C][B(C<sub>6</sub>F<sub>5</sub>)<sub>4</sub>] from **Table 5**, entry 1 in CDCl<sub>3</sub> at 298 K.

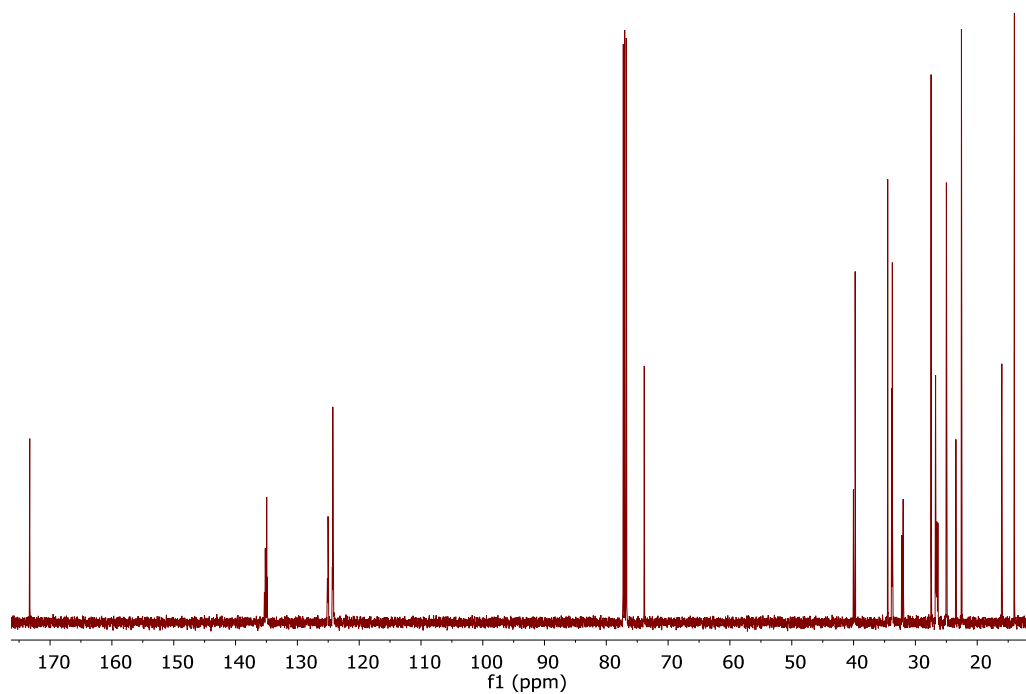

**Fig. S70**  $^{13}\text{C}$  NMR spectrum of PIP-*b*-PDL 800:300 equivalents generated by **6**/[Ph<sub>3</sub>C][B(C<sub>6</sub>F<sub>5</sub>)<sub>4</sub>] from Table 5, entry 2 in CDCl<sub>3</sub> at 298 K.

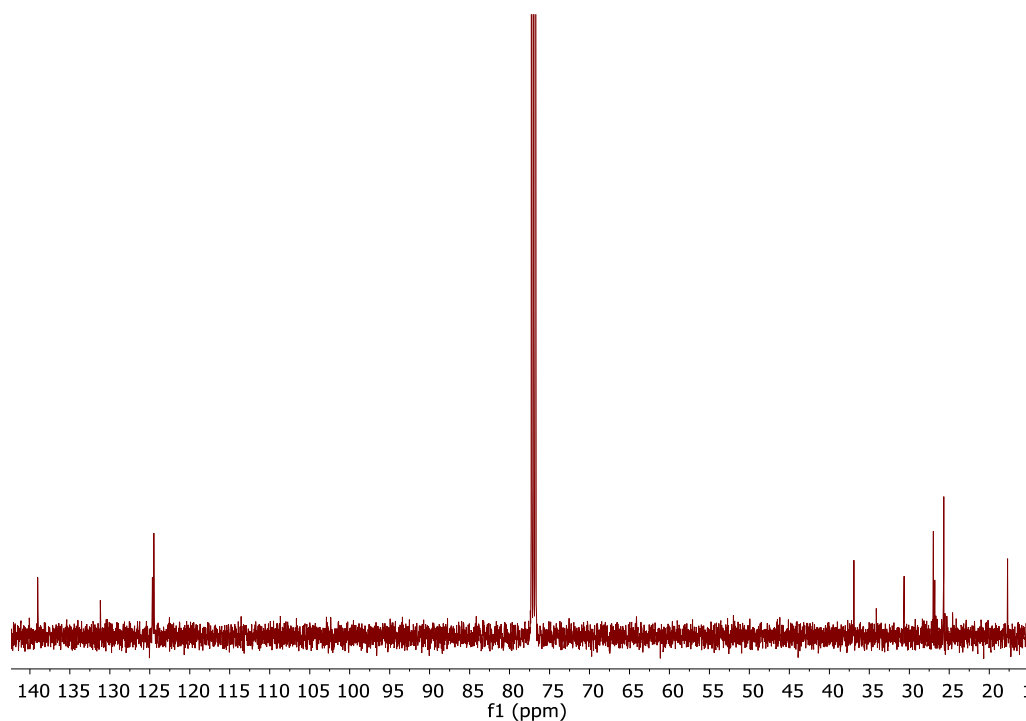

**Fig. S71**  $^{13}\text{C}$  NMR spectrum of PMyr-*b*-PCL 800:300 equivalents generated by **6**/[Ph<sub>3</sub>C][B(C<sub>6</sub>F<sub>5</sub>)<sub>4</sub>] from Table 5, entry 3 in CDCl<sub>3</sub> at 298 K.

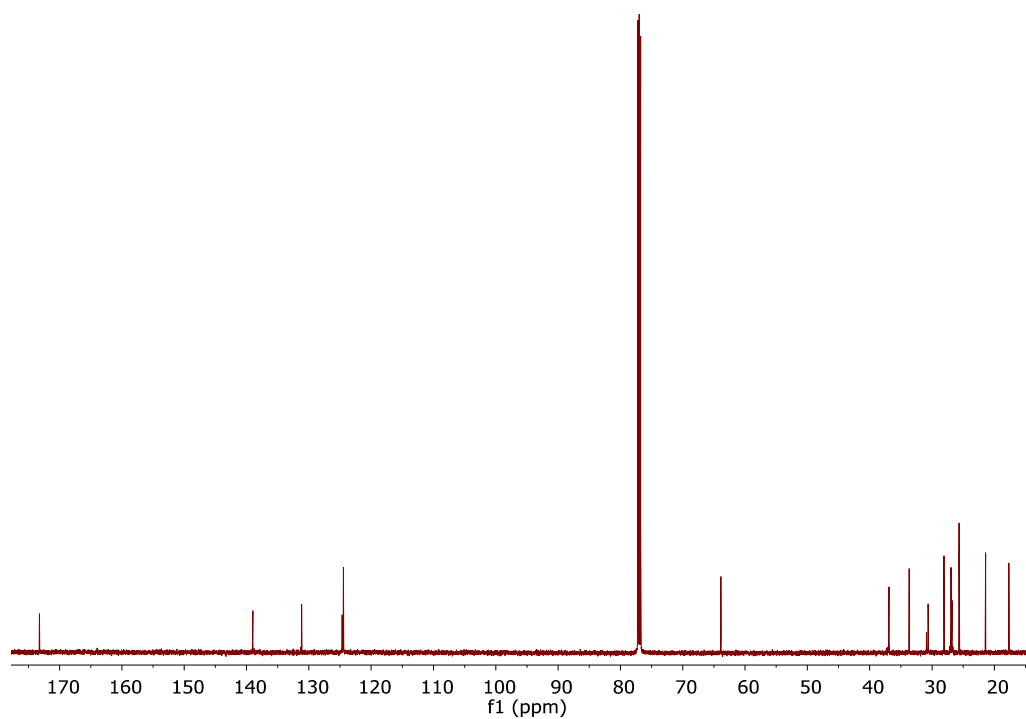

**Fig. S72**  $^{13}\text{C}$  NMR spectrum of PMyr-*b*-PVL 800:300 equivalents generated by **6**/[Ph<sub>3</sub>C][B(C<sub>6</sub>F<sub>5</sub>)<sub>4</sub>] from Table 5, entry 4 in CDCl<sub>3</sub> at 298 K.

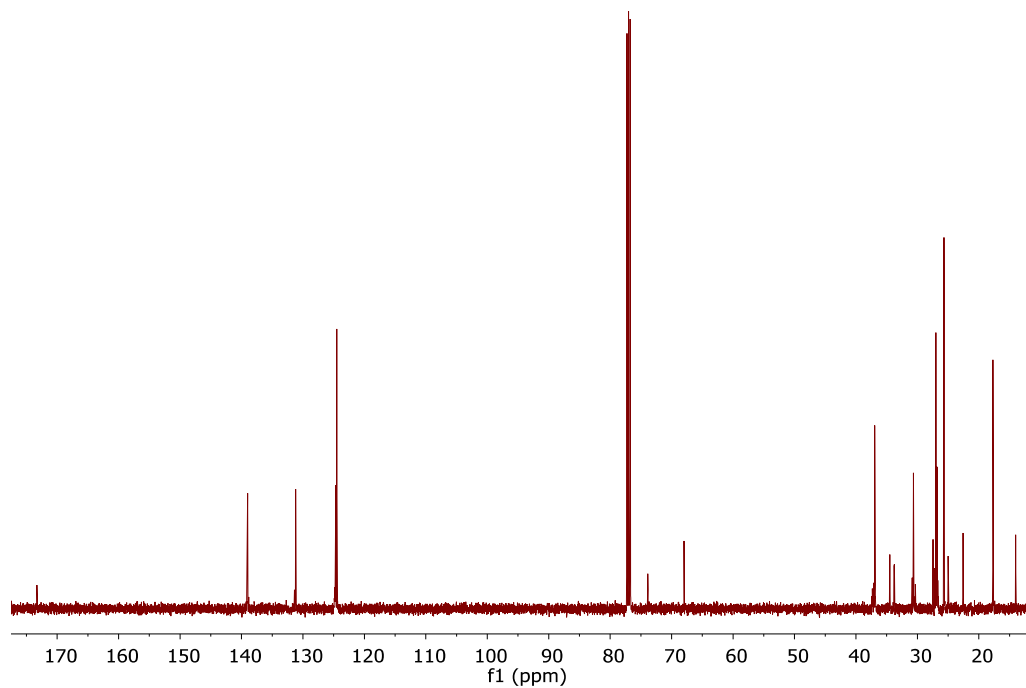

**Fig. S73**  $^{13}\text{C}$  NMR spectrum of PMyr-*b*-PDL 800:300 equivalents generated by **6**/[Ph<sub>3</sub>C][B(C<sub>6</sub>F<sub>5</sub>)<sub>4</sub>] from Table 5, entry 5 in CDCl<sub>3</sub> at 298 K.

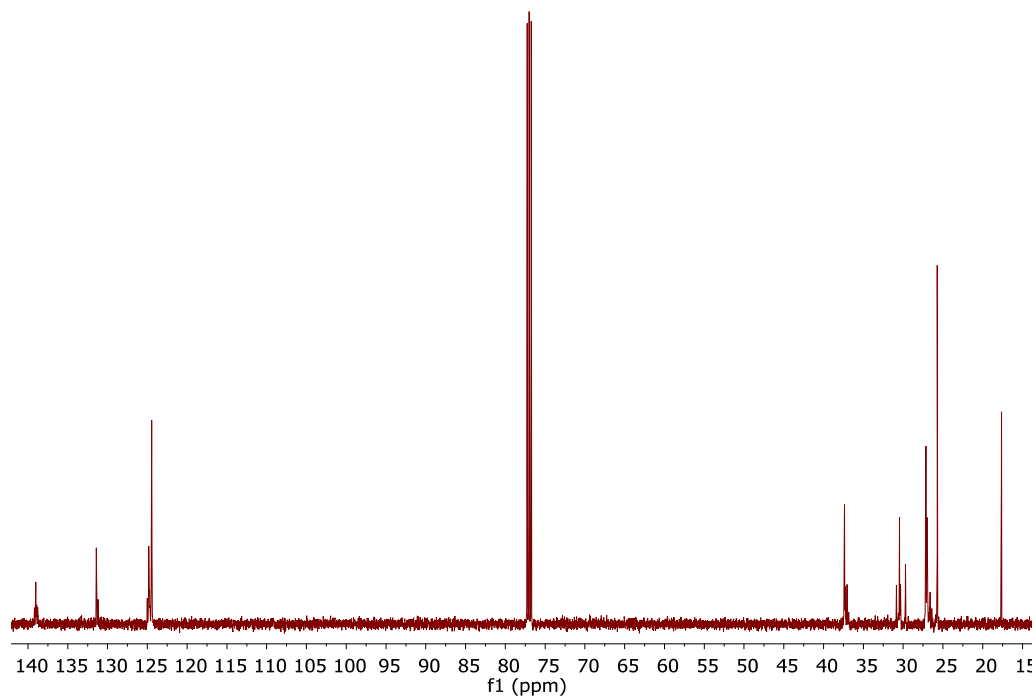

**Fig. S74**  $^{13}\text{C}$  NMR spectrum of PMyr 800 equivalents generated by **8**/[Ph<sub>3</sub>C][B(C<sub>6</sub>F<sub>5</sub>)<sub>4</sub>] from **Table S1**, entry 1 in CDCl<sub>3</sub> at 298 K (30 min).

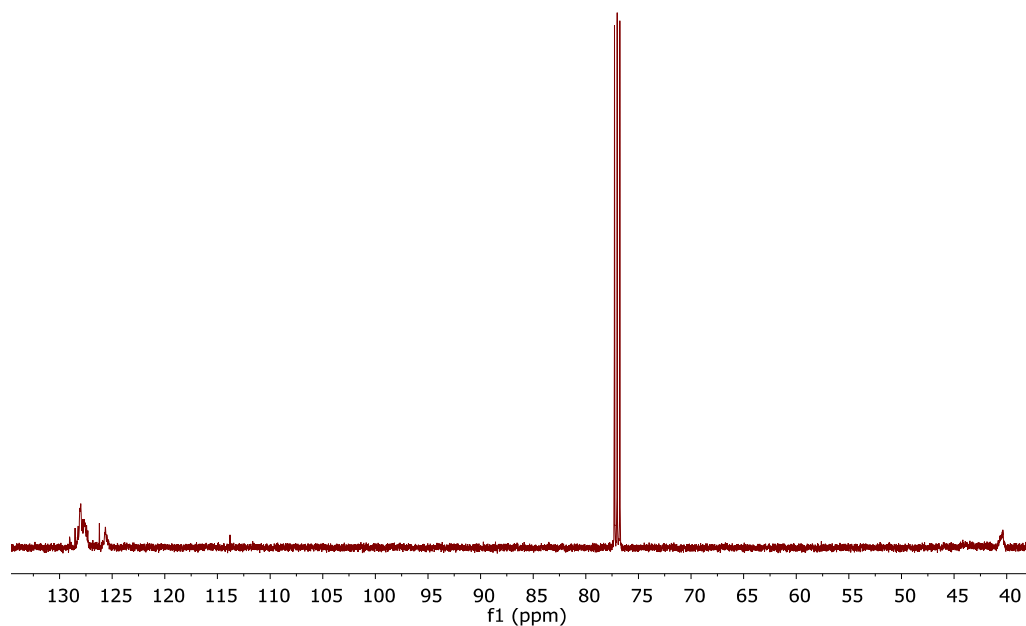

**Fig. S75**  $^{13}\text{C}$  NMR spectrum of PS 800 equivalents generated by **8**/[Ph<sub>3</sub>C][B(C<sub>6</sub>F<sub>5</sub>)<sub>4</sub>] from **Table S1**, entry 2 in CDCl<sub>3</sub> at 298 K (30 min).

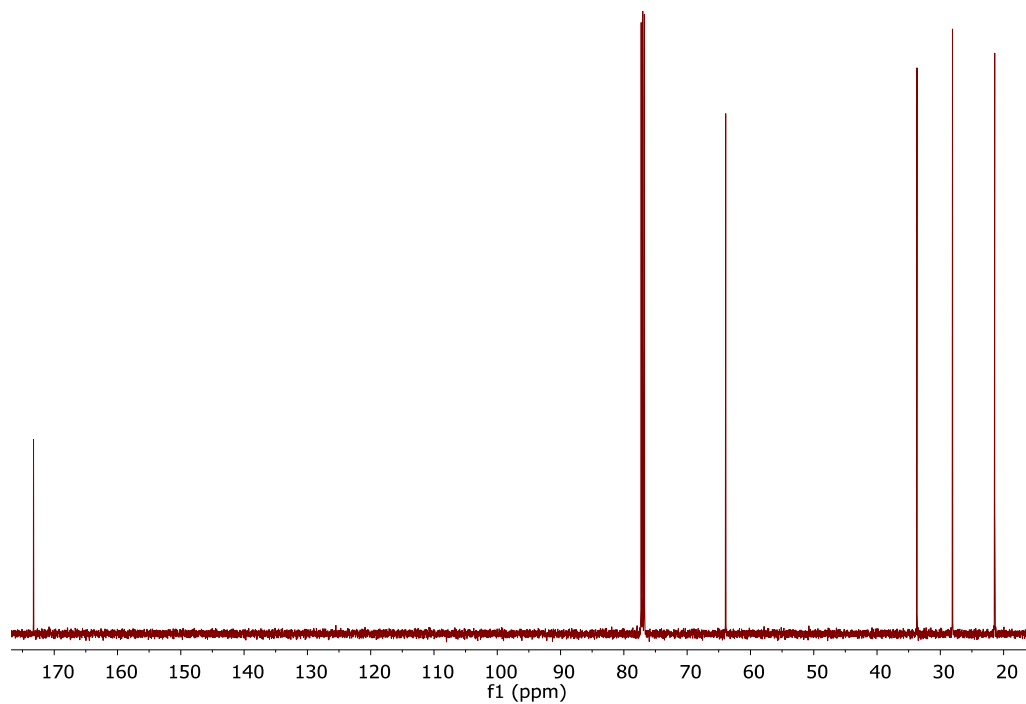

**Fig. S76**  $^{13}\text{C}$  NMR spectrum of PVL 300 equivalents generated by **8**/[Ph<sub>3</sub>C][B(C<sub>6</sub>F<sub>5</sub>)<sub>4</sub>] from **Table S1**, entry 3 in CDCl<sub>3</sub> at 298 K (10 min).

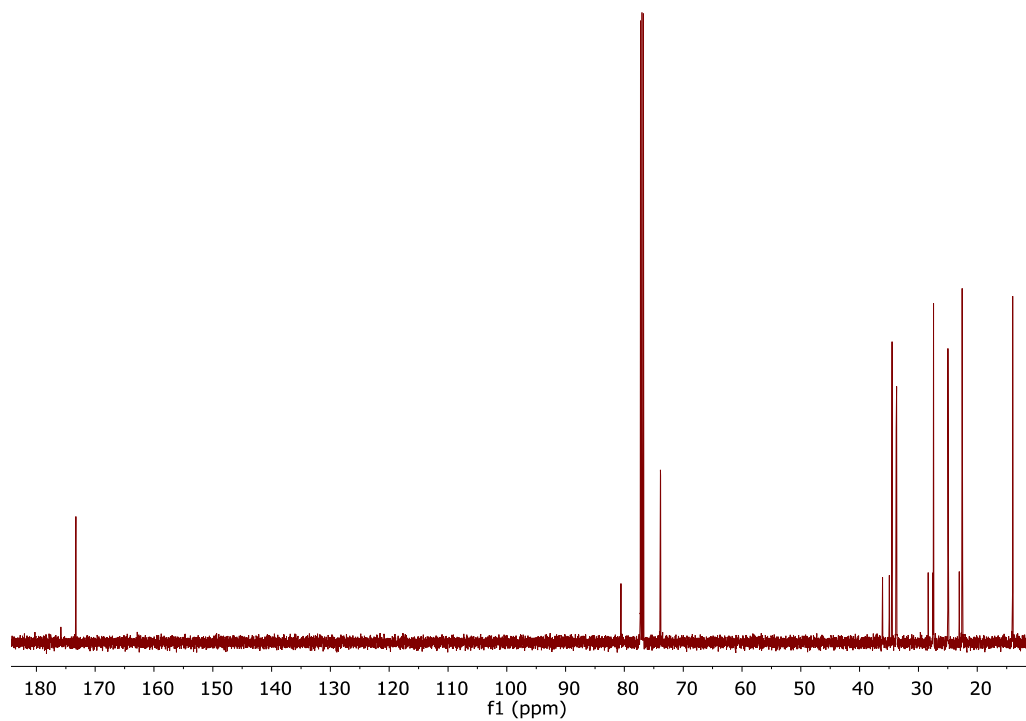

**Fig. S77**  $^{13}\text{C}$  NMR spectrum of PDL 300 equivalents generated by **8**/[Ph<sub>3</sub>C][B(C<sub>6</sub>F<sub>5</sub>)<sub>4</sub>] from **Table S1**, entry 4 in CDCl<sub>3</sub> at 298 K (6 h).

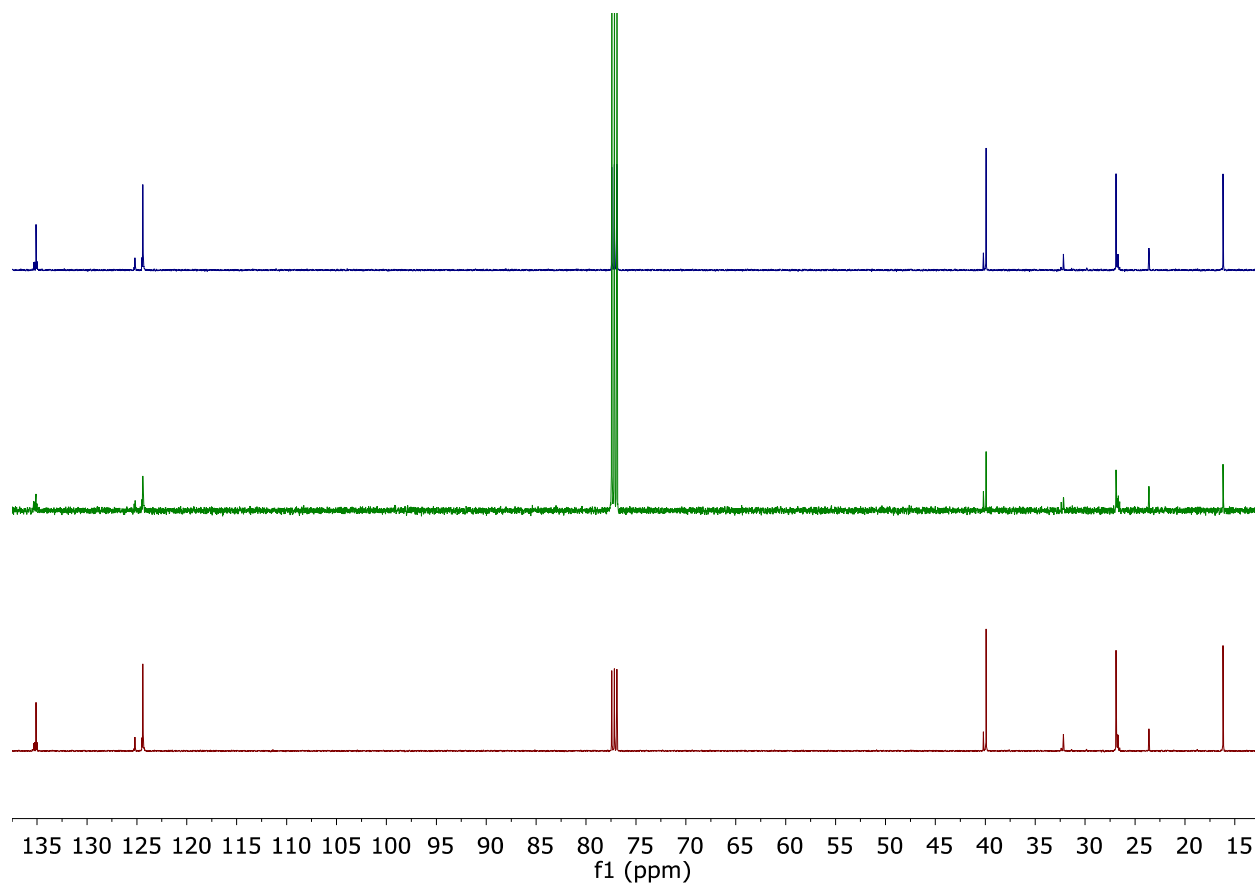

**Fig. S78**  $^{13}\text{C}$  NMR spectrum of PIP 300 equivalents generated by **6**/[Ph<sub>3</sub>C][B(C<sub>6</sub>F<sub>5</sub>)<sub>4</sub>] from **Table S2**, entry 1 in CDCl<sub>3</sub> at 298 K (12 h).

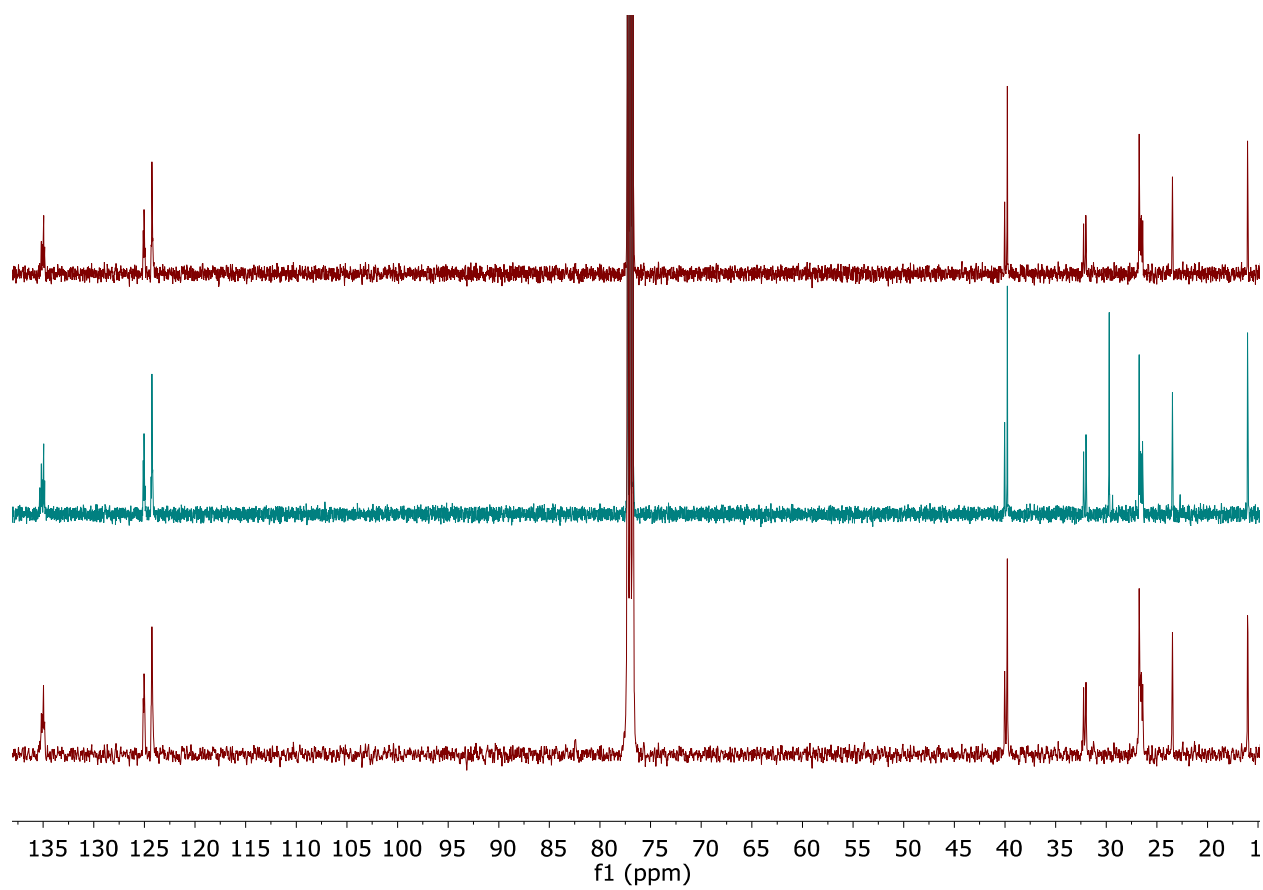

**Fig. S79**  $^{13}\text{C}$  NMR spectrum of PIP 550 equivalents generated by **6**/[Ph<sub>3</sub>C][B(C<sub>6</sub>F<sub>5</sub>)<sub>4</sub>] from **Table S2**, entry 2 in CDCl<sub>3</sub> at 298 K (12 h).



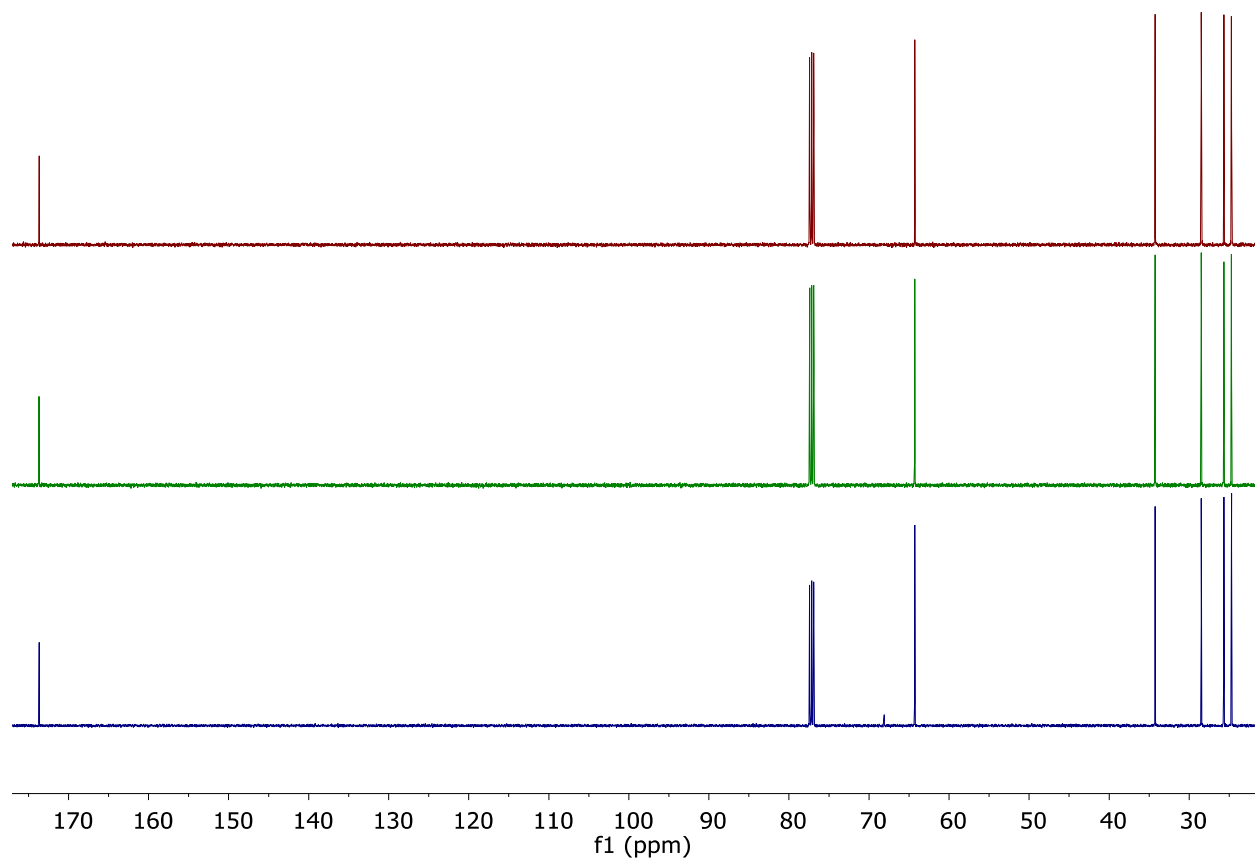

**Fig. S80**  $^{13}\text{C}$  NMR spectrum of PCL 550 equivalents generated by **6**/[Ph<sub>3</sub>C][B(C<sub>6</sub>F<sub>5</sub>)<sub>4</sub>] from **Table S2**, entry 3 in CDCl<sub>3</sub> at 298 K (12 h).

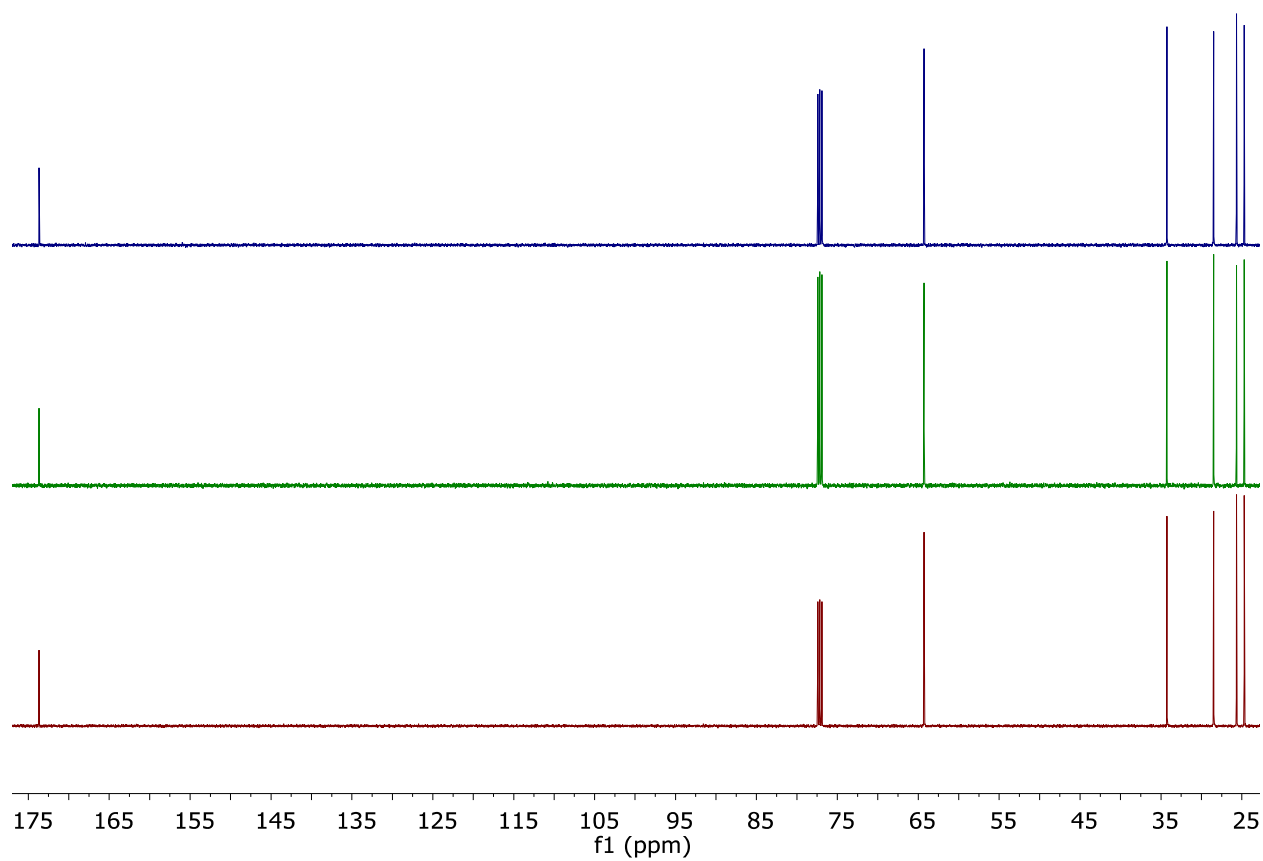

**Fig. S81**  $^{13}\text{C}$  NMR spectrum of PCL 800 equivalents generated by **6**/[Ph<sub>3</sub>C][B(C<sub>6</sub>F<sub>5</sub>)<sub>4</sub>] from **Table S2**, entry 4 in CDCl<sub>3</sub> at 298 K (12 h).

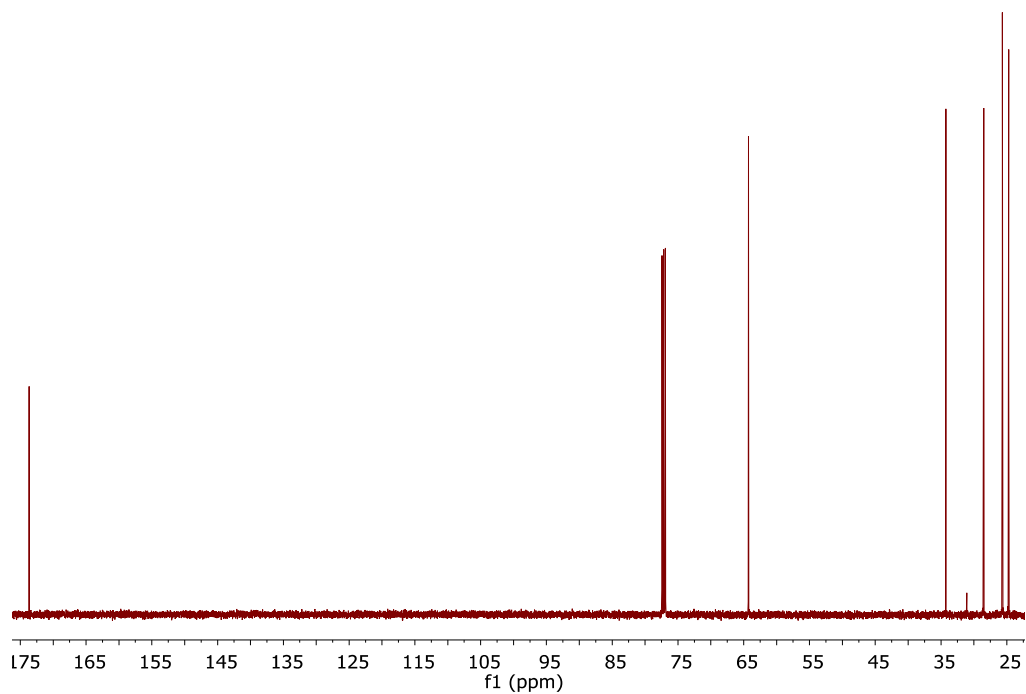

**Fig. S82**  $^{13}\text{C}$  NMR spectrum of PCL 800 equivalents generated by **6** from **Table S2**, entry 5 in  $\text{CDCl}_3$  at 298 K (No  $[\text{Ph}_3\text{C}][\text{B}(\text{C}_6\text{F}_5)_4]$  added) (10 min).

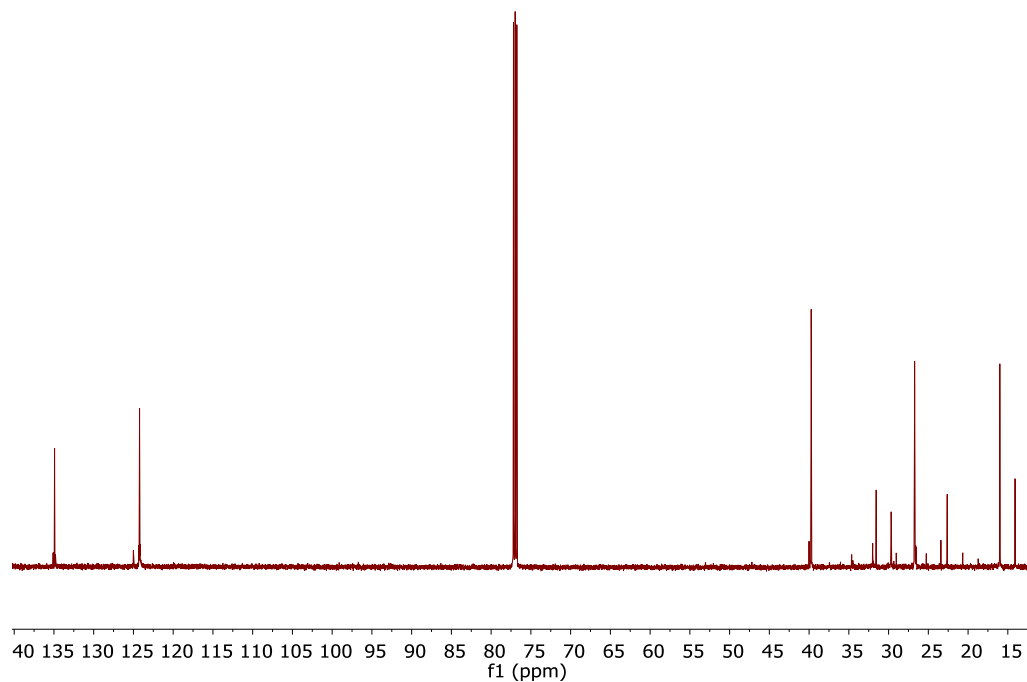

**Fig. S83**  $^{13}\text{C}$  NMR spectrum of PIP 50 equivalents generated by **6**/ $[\text{Ph}_3\text{C}][\text{B}(\text{C}_6\text{F}_5)_4]$  from **Table S3**, entry 1 in  $\text{CDCl}_3$  at 298 K (12 h).

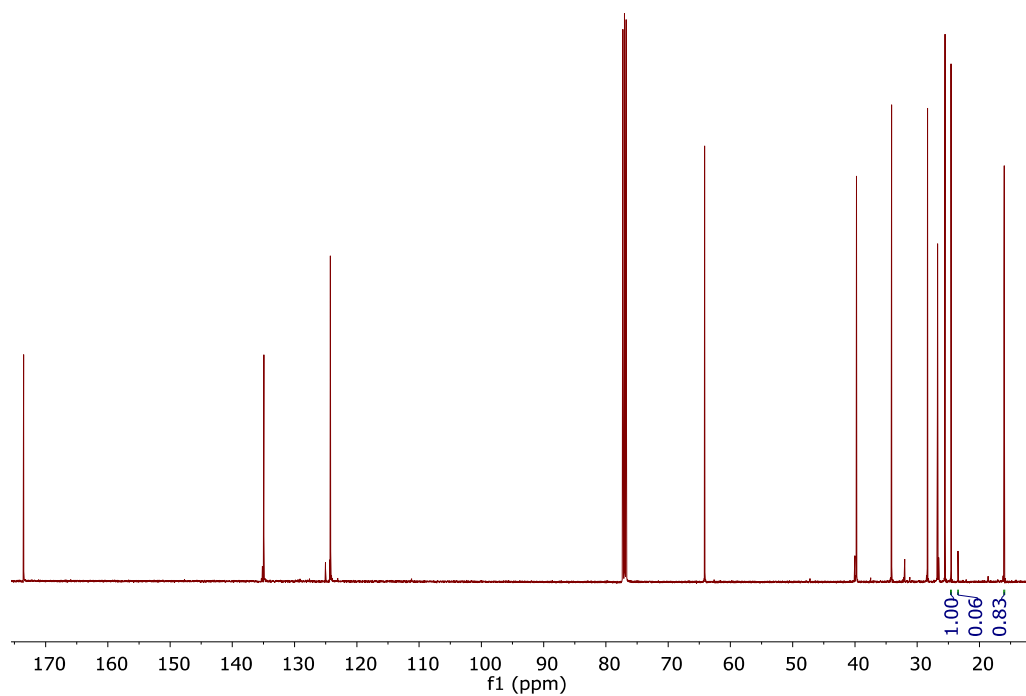

**Fig. S84**  $^{13}\text{C}$  NMR spectrum of PIP-*b*-PCL 50:50 equivalents generated by **6**/[Ph<sub>3</sub>C][B(C<sub>6</sub>F<sub>5</sub>)<sub>4</sub>] from **Table S3**, entry 2 in CDCl<sub>3</sub> at 298 K.

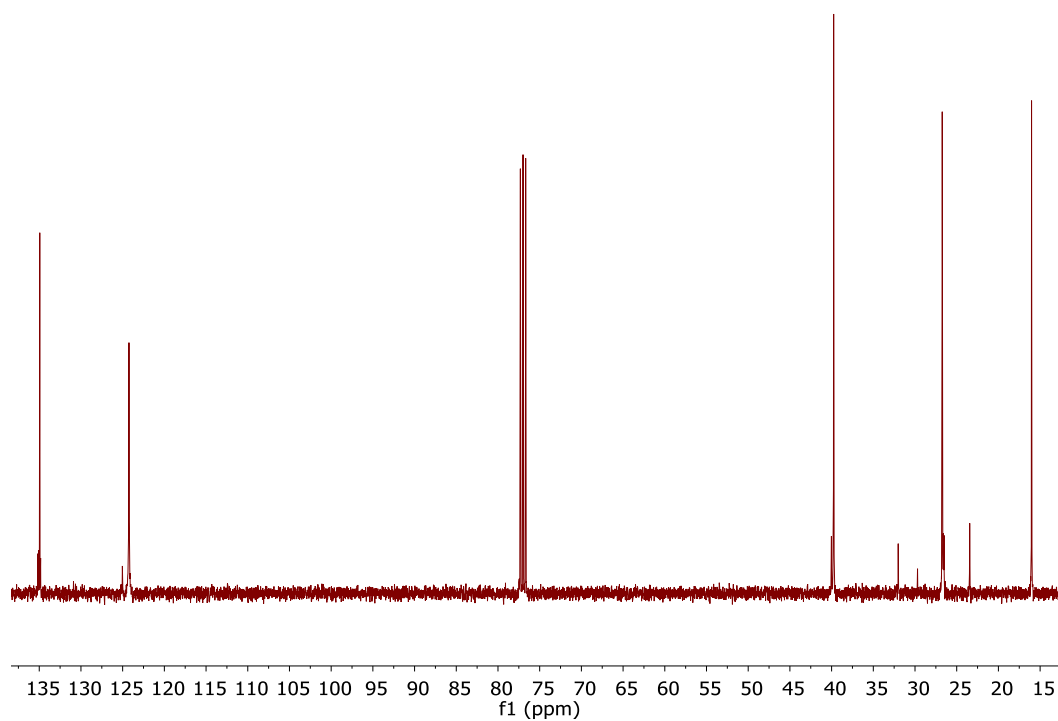

**Fig. S85**  $^{13}\text{C}$  NMR spectrum of recovered PIP 50 equivalents after hydrolysis of PIP-*b*-PCL 50:50 from **Table S3**, entry 3 in CDCl<sub>3</sub> at 298 K (12 h).

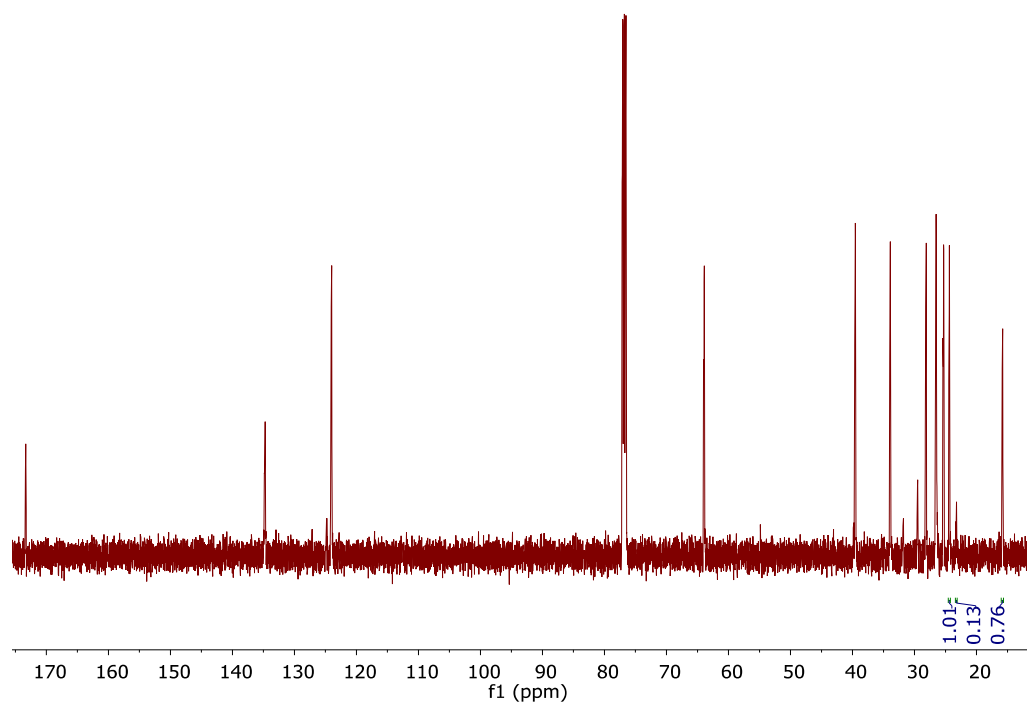

**Fig. S86**  $^{13}\text{C}$  NMR spectrum of PIP-*b*-PCL 50:50 equivalents generated by  $\text{Y}[\text{N}(\text{SiMe}_3)_2]_3$  from **Table S3**, entry 4 in  $\text{CDCl}_3$  at 298 K (6 h).

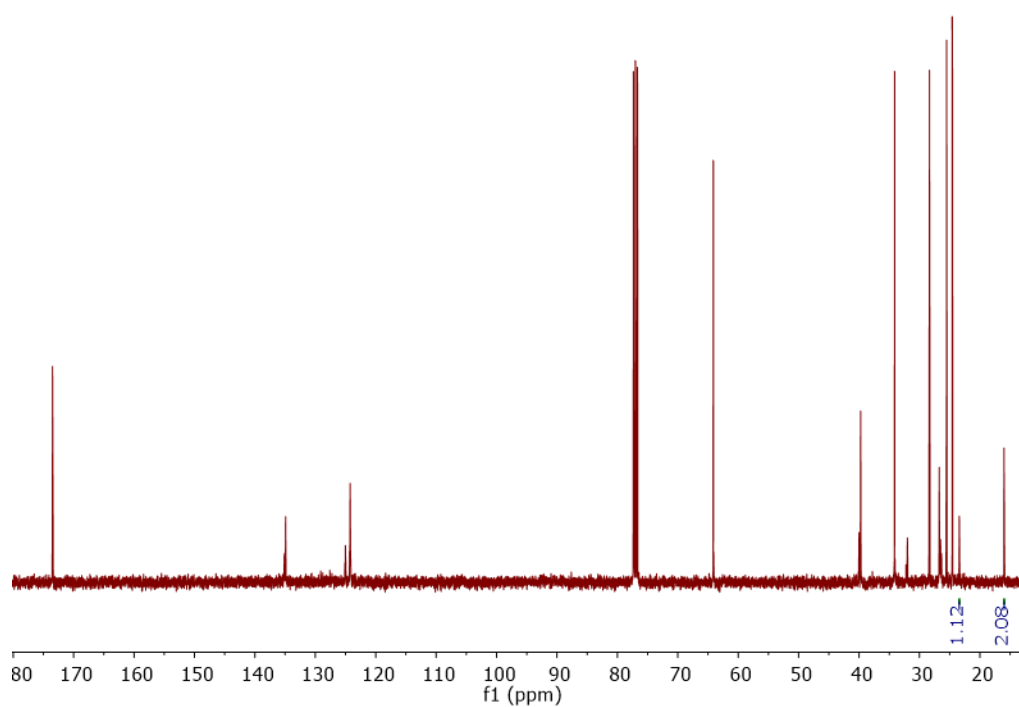

**Fig. S87**  $^{13}\text{C}$  NMR spectrum of PIP-*b*-PCL 50:50 equivalents generated by **6**/[ $\text{Ph}_3\text{C}$ ][ $\text{B}(\text{C}_6\text{F}_5)_4$ ] (1 mL of toluene) from **Table S3**, entry 5 in  $\text{CDCl}_3$  at 298 K.

### 3.3 Diffusion-Ordered Spectroscopy (DOSY)

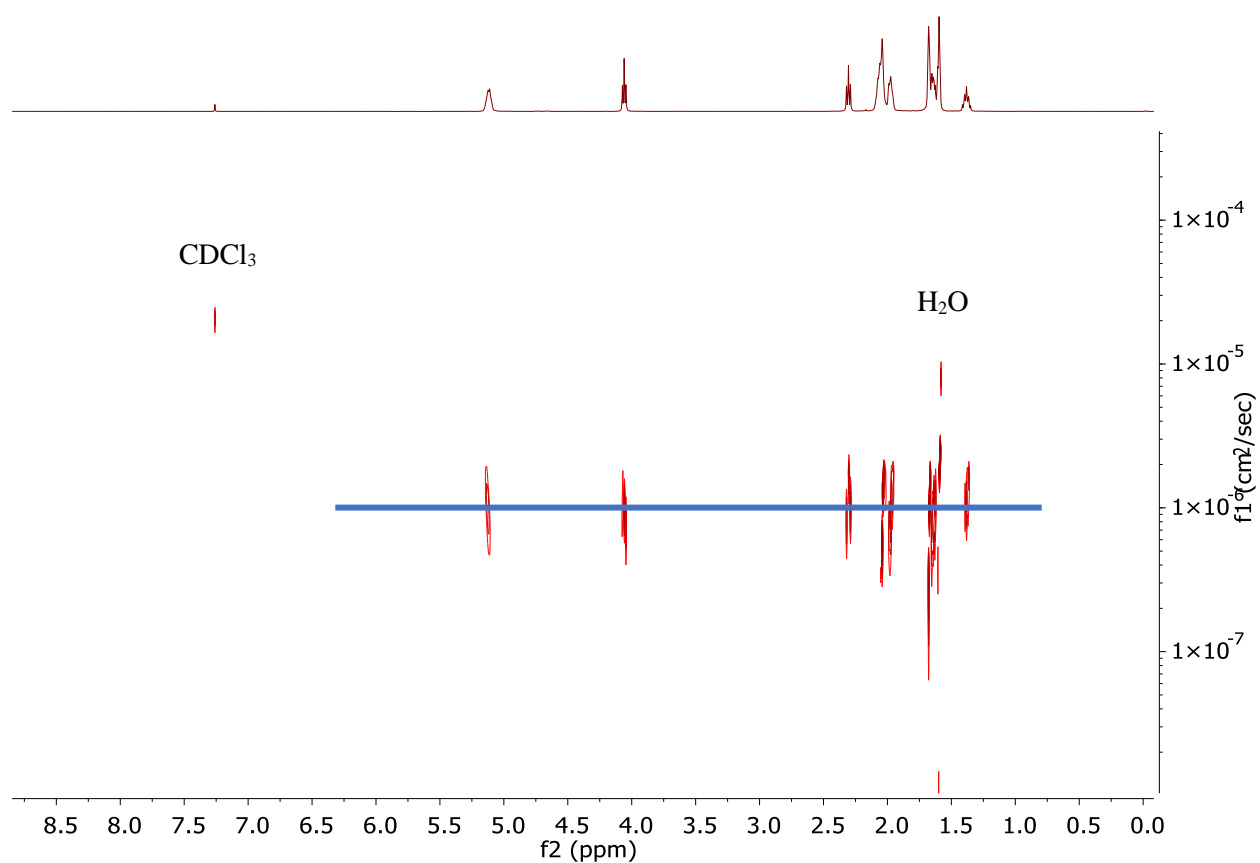

**Fig. S88** DOSY NMR spectrum of PIP-*b*-PCL 800:300 equivalents generated by **6**/[Ph<sub>3</sub>C][B(C<sub>6</sub>F<sub>5</sub>)<sub>4</sub>] from **Table 2**, entry 1a in CDCl<sub>3</sub> at 298 K.

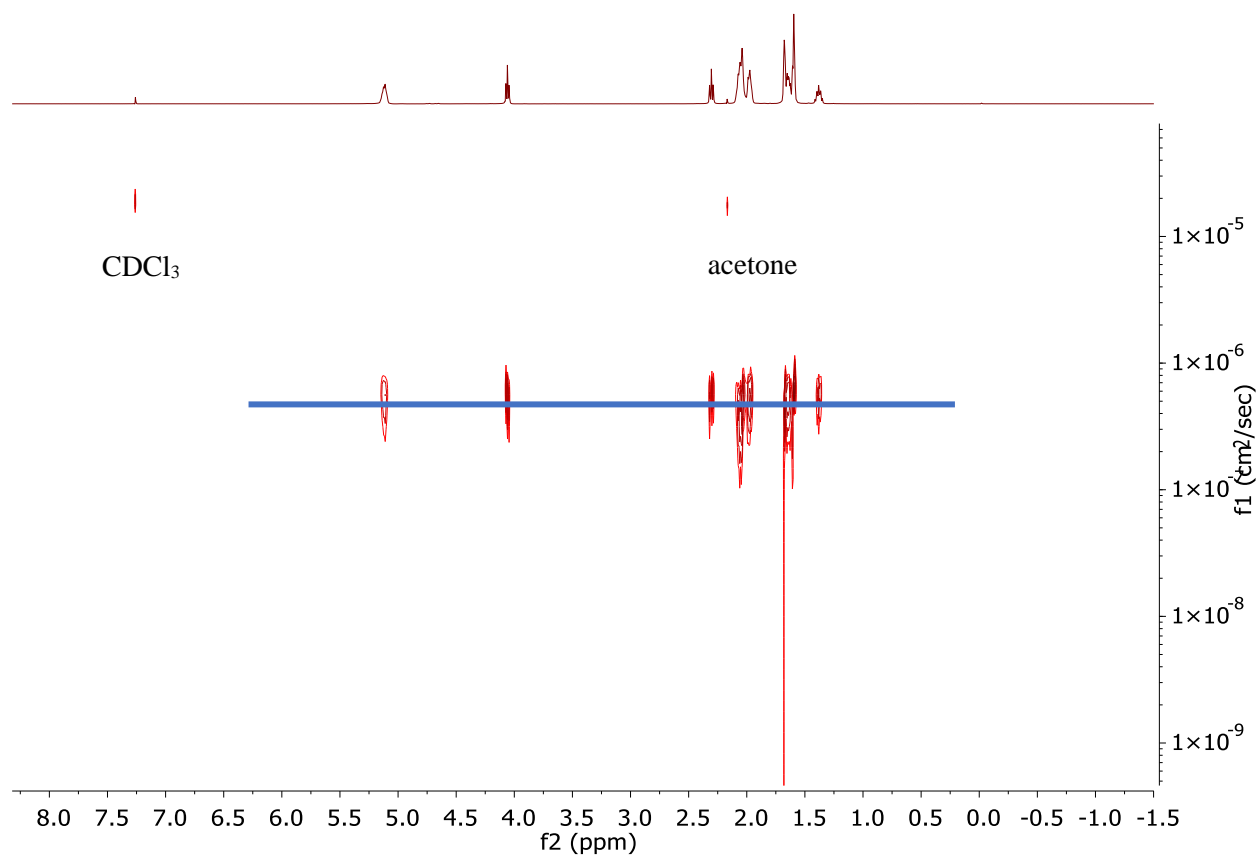

**Fig. S89** DOSY NMR spectrum of PIP-*b*-PCL 800:300 equivalents generated by **6**/[Ph<sub>3</sub>C][B(C<sub>6</sub>F<sub>5</sub>)<sub>4</sub>] from **Table 2**, entry 1b in CDCl<sub>3</sub> at 298 K.

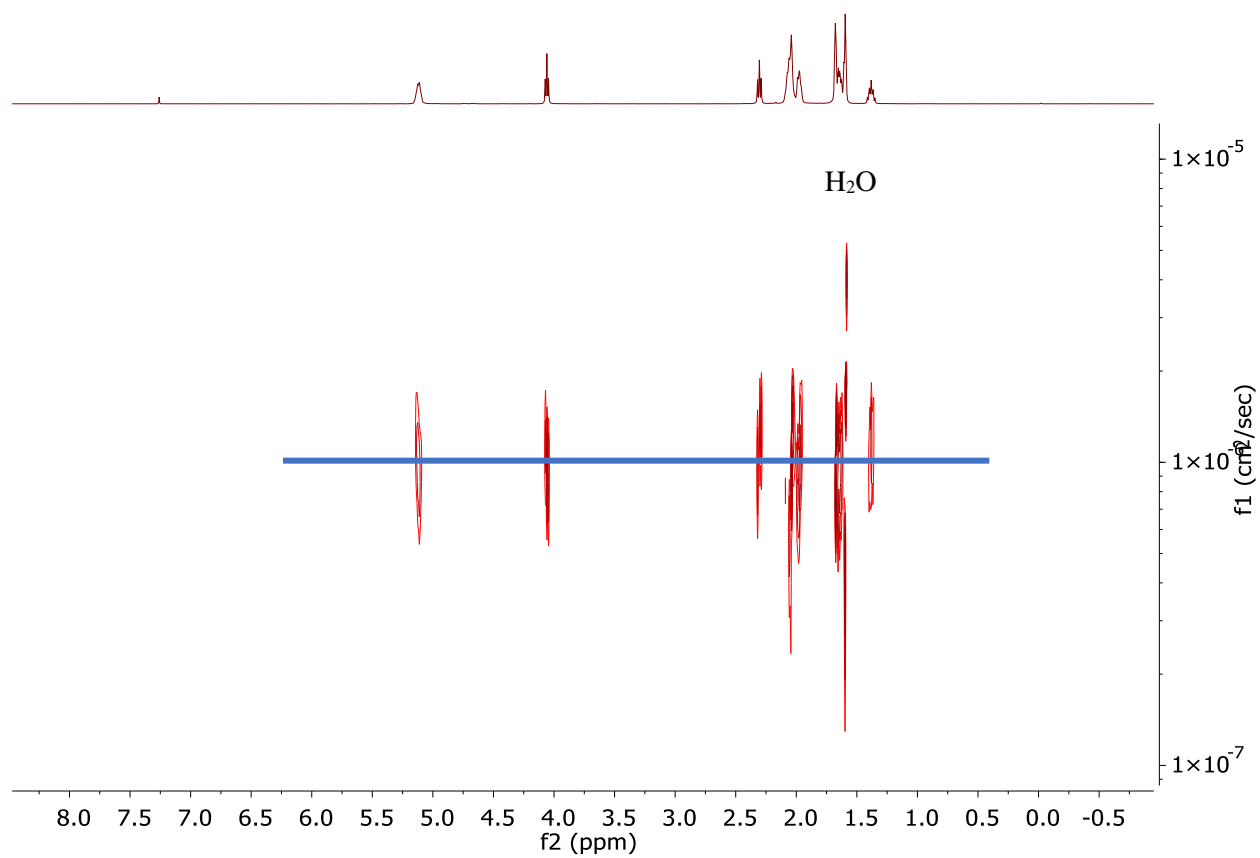

**Fig. S90** DOSY NMR spectrum of PIP-*b*-PCL 800:300 equivalents generated by **6**/[Ph<sub>3</sub>C][B(C<sub>6</sub>F<sub>5</sub>)<sub>4</sub>] from **Table 2**, entry 1c in CDCl<sub>3</sub> at 298 K.



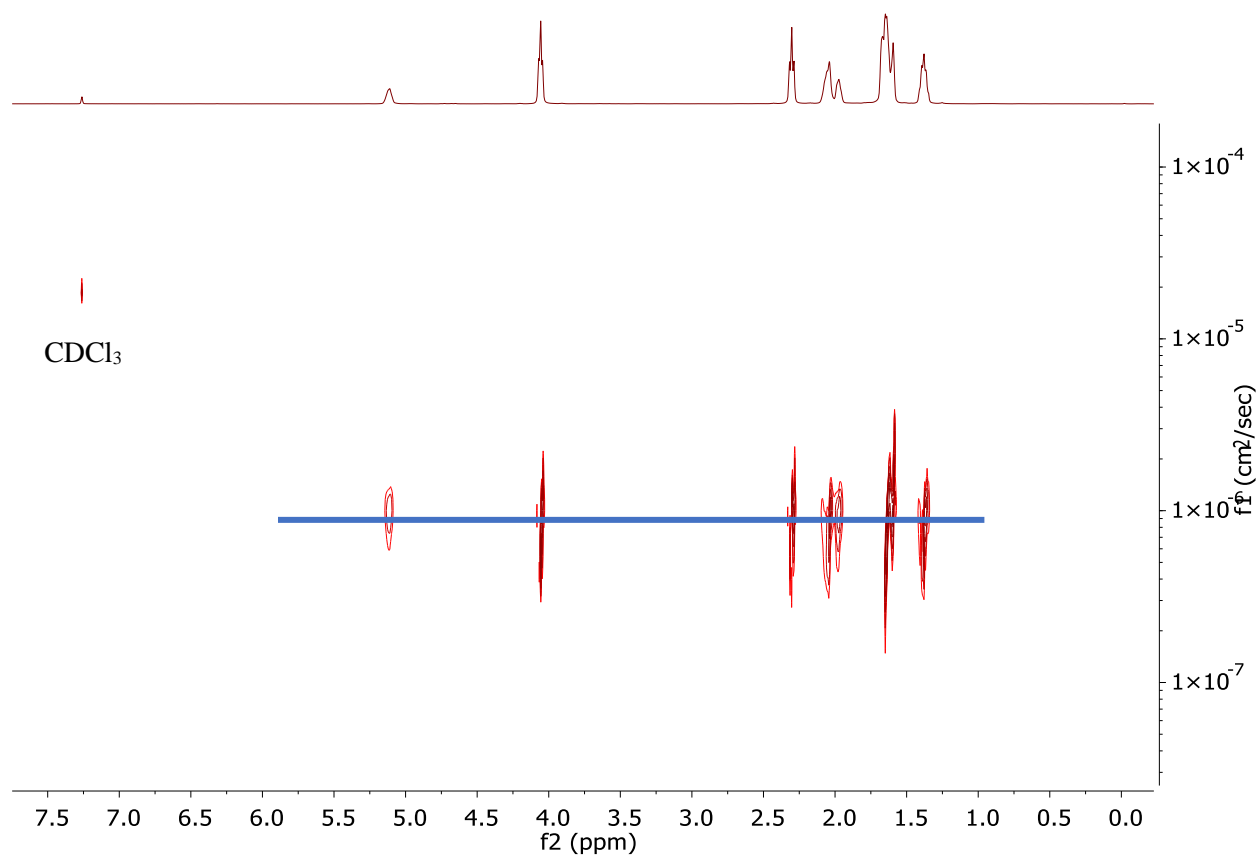

**Fig. S91** DOSY NMR spectrum of PIP-*b*-PCL 550:550 equivalents generated by **6**/[Ph<sub>3</sub>C][B(C<sub>6</sub>F<sub>5</sub>)<sub>4</sub>] from **Table 2**, entry 2a in CDCl<sub>3</sub> at 298 K.

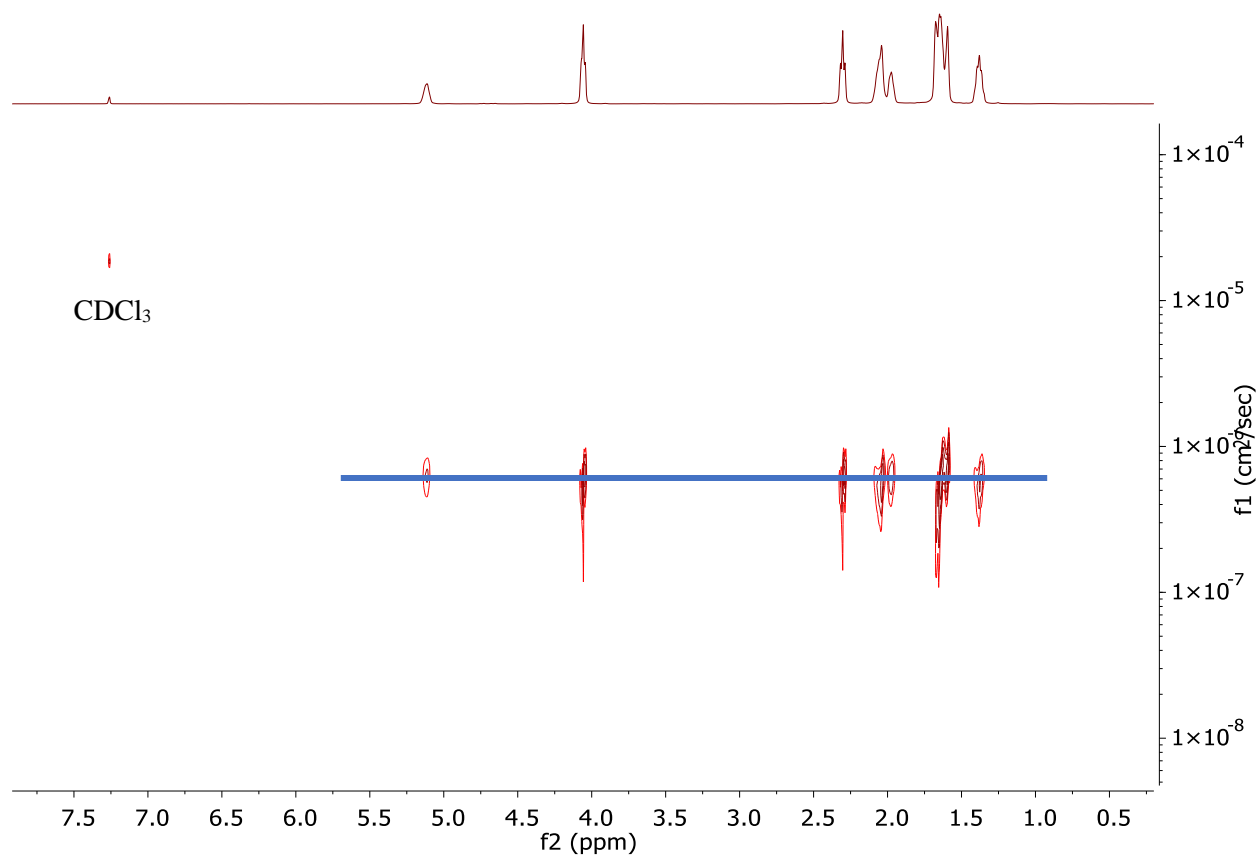

**Fig. S92** DOSY NMR spectrum of PIP-*b*-PCL 550:550 equivalents generated by **6**/[Ph<sub>3</sub>C][B(C<sub>6</sub>F<sub>5</sub>)<sub>4</sub>] from **Table 2**, entry 2b in CDCl<sub>3</sub> at 298 K.

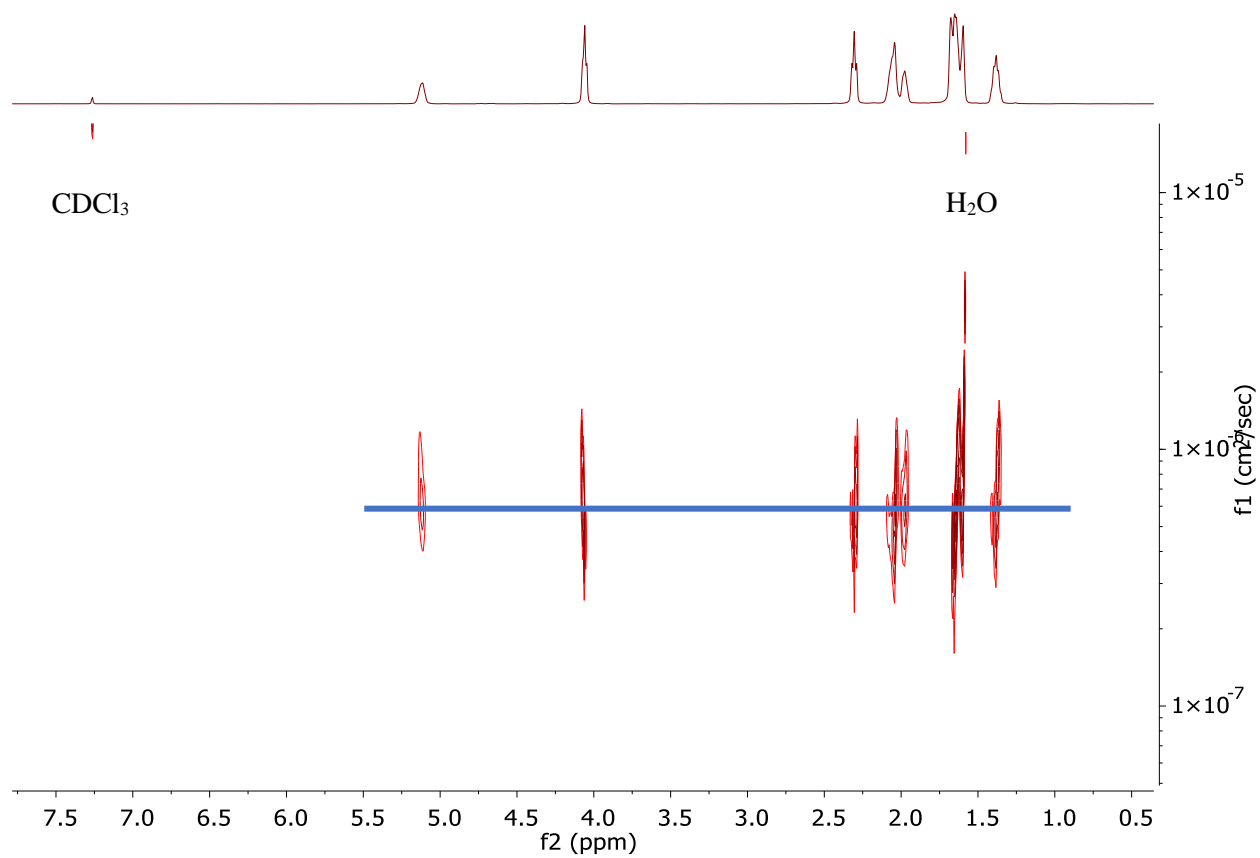

**Fig. S93** DOSY NMR spectrum of PIP-*b*-PCL 550:550 equivalents generated by **6**/[Ph<sub>3</sub>C][B(C<sub>6</sub>F<sub>5</sub>)<sub>4</sub>] from **Table 2**, entry 2c in CDCl<sub>3</sub> at 298 K.

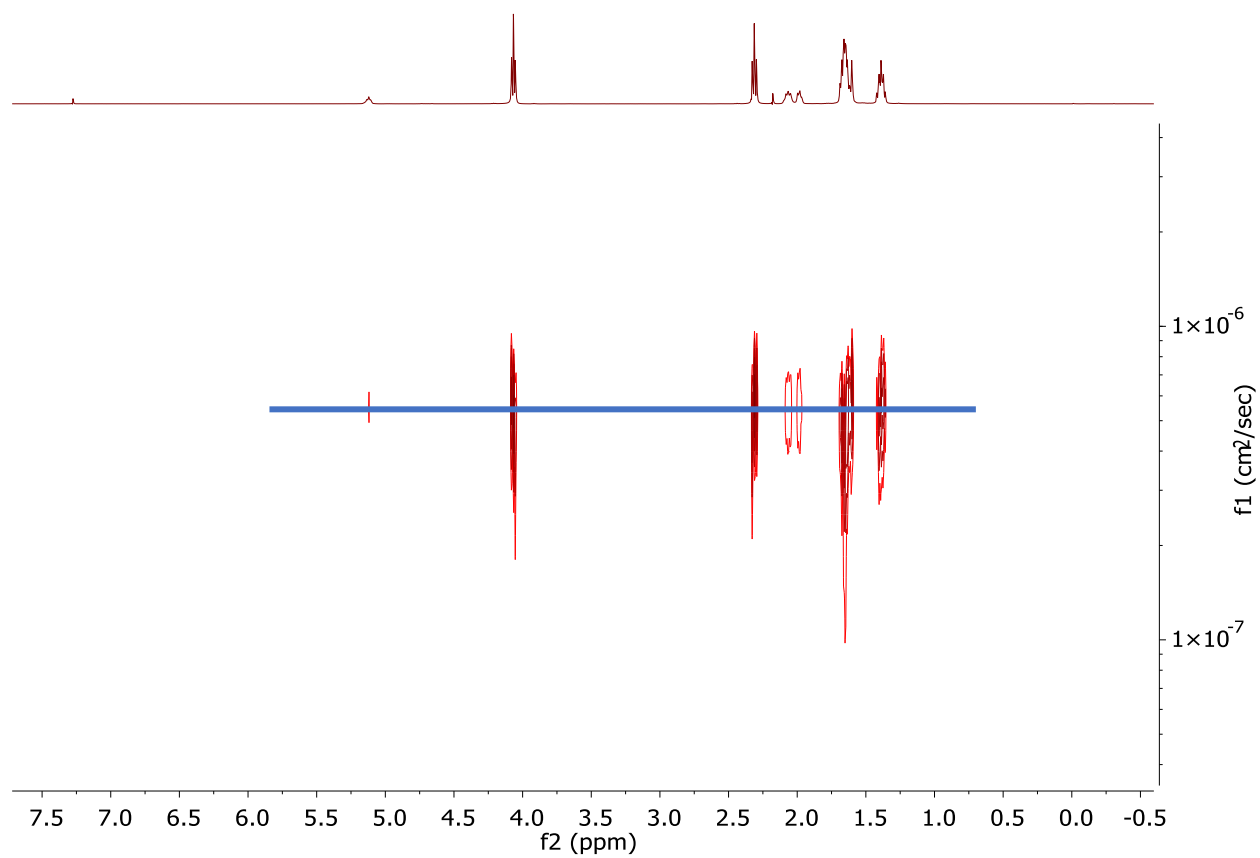

**Fig. S94** DOSY NMR spectrum of PIP-*b*-PCL 300:800 equivalents generated by **6**/[Ph<sub>3</sub>C][B(C<sub>6</sub>F<sub>5</sub>)<sub>4</sub>] from **Table 2**, entry 3a in CDCl<sub>3</sub> at 298 K.

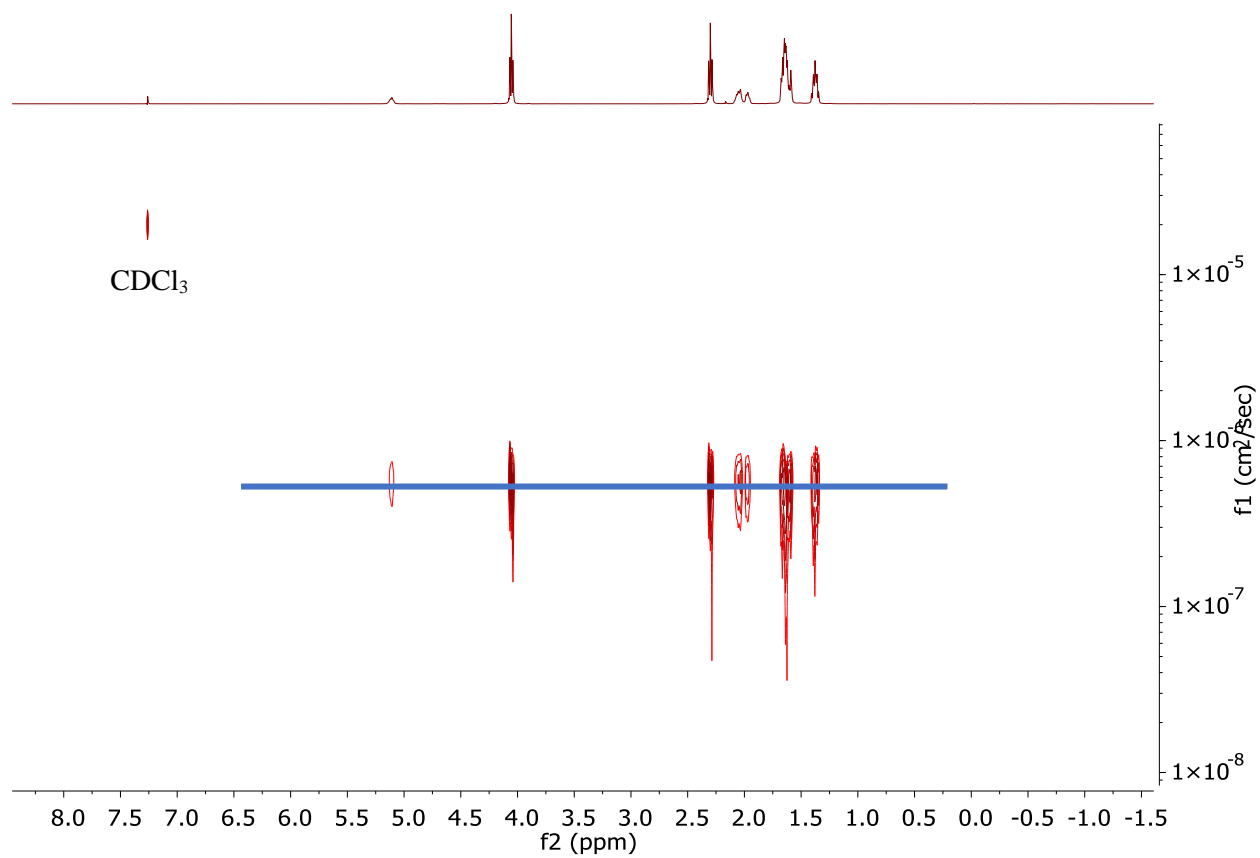

**Fig. S95** DOSY NMR spectrum of PIP-*b*-PCL 300:800 equivalents generated by **6**/[Ph<sub>3</sub>C][B(C<sub>6</sub>F<sub>5</sub>)<sub>4</sub>] from **Table 2**, entry 3b in CDCl<sub>3</sub> at 298 K.

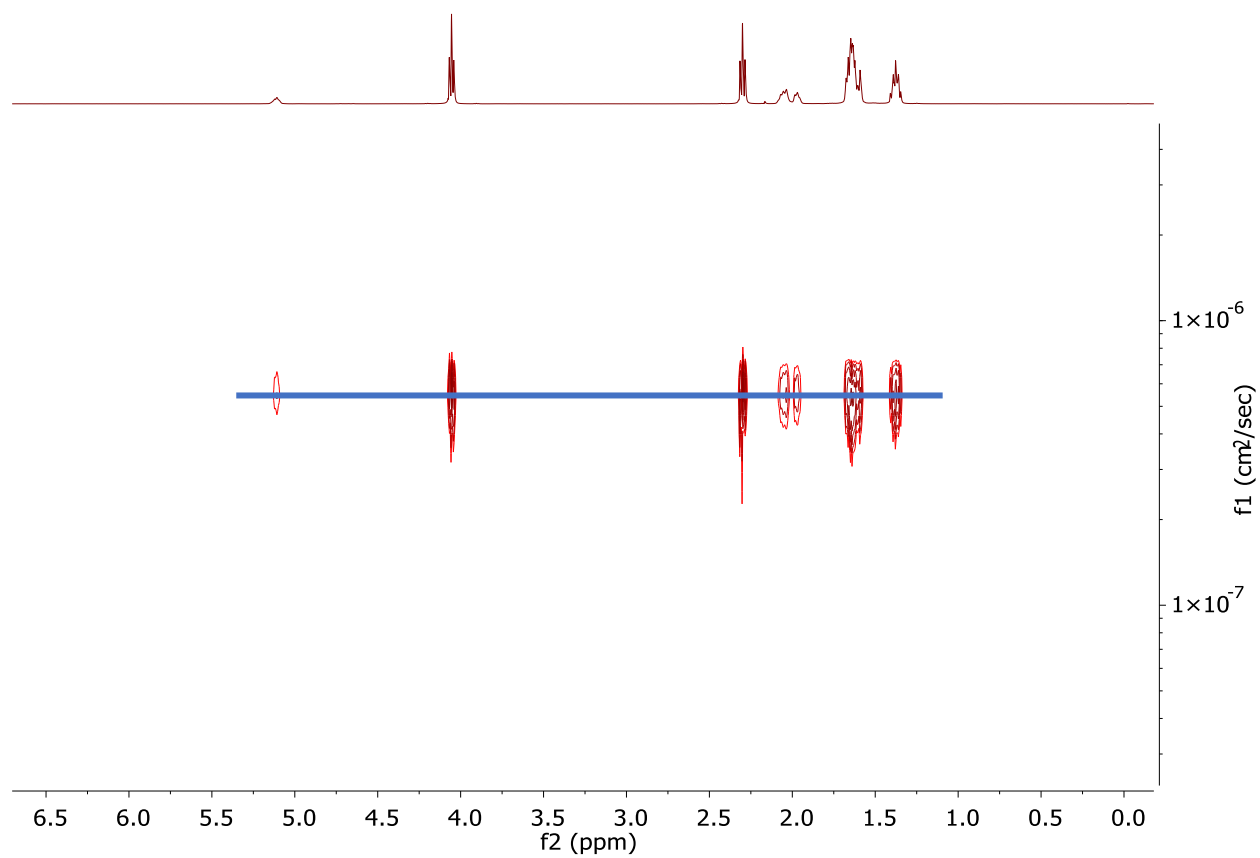

**Fig. S96** DOSY NMR spectrum of PIP-*b*-PCL 300:800 equivalents generated by **6**/[Ph<sub>3</sub>C][B(C<sub>6</sub>F<sub>5</sub>)<sub>4</sub>] from **Table 2**, entry 3c in CDCl<sub>3</sub> at 298 K.

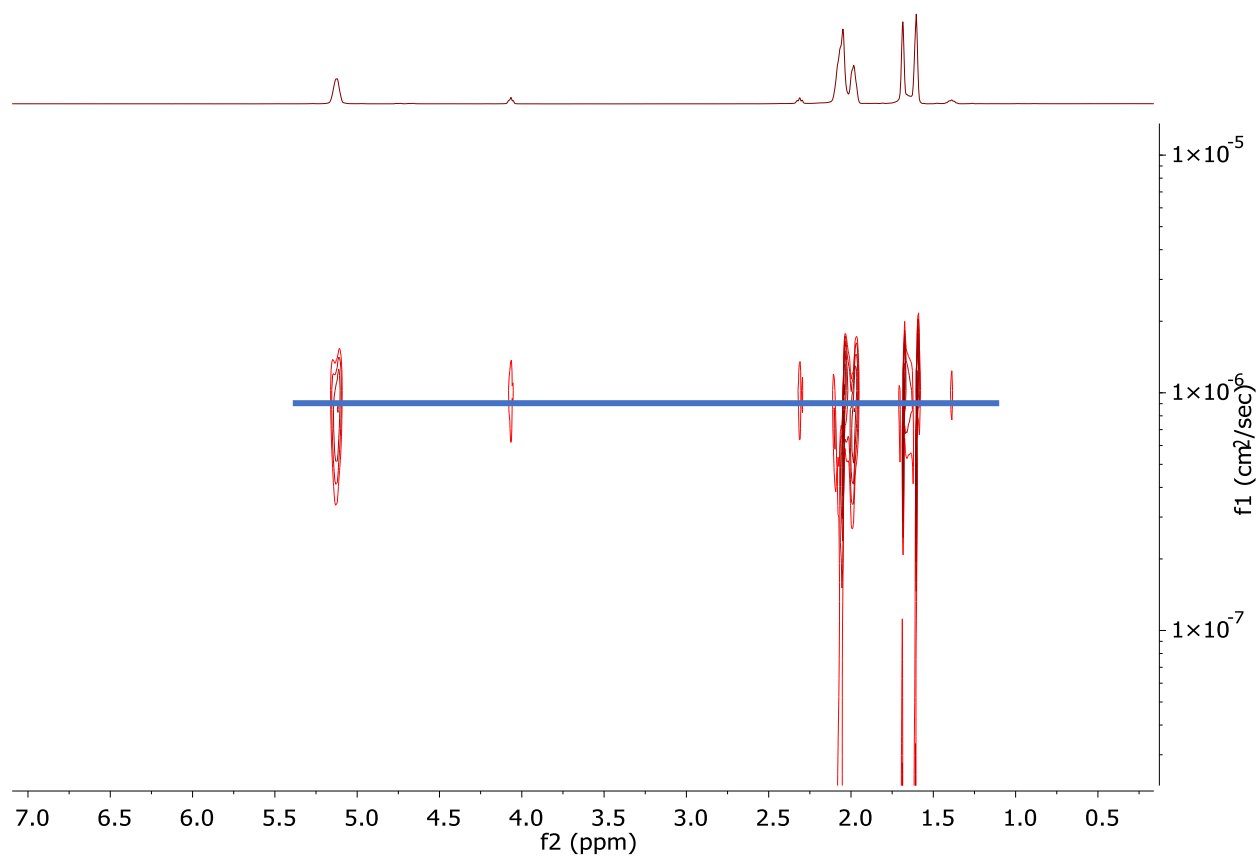

**Fig. S97** DOSY NMR spectrum of PIP-*b*-PCL 800:300 equivalents generated by **6** and 0.5 equivalents of  $[\text{Ph}_3\text{C}][\text{B}(\text{C}_6\text{F}_5)_4]$  from **Table 3**, entry 3a in  $\text{CDCl}_3$  at 298 K.

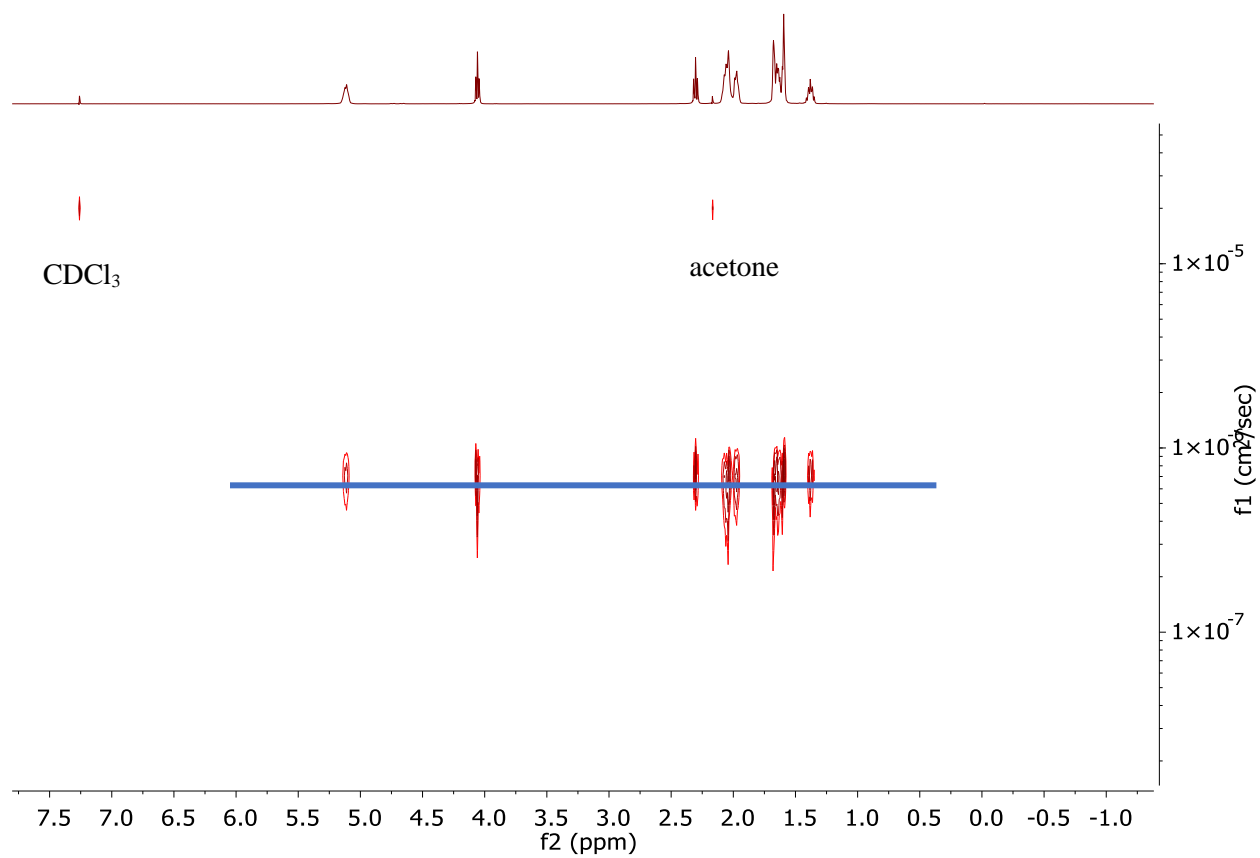

**Fig. S98** DOSY NMR spectrum of PIP-*b*-PCL 800:300 equivalents generated by **6** and 0.5 equivalents of [Ph<sub>3</sub>C][B(C<sub>6</sub>F<sub>5</sub>)<sub>4</sub>] from **Table 3**, entry 3b in CDCl<sub>3</sub> at 298 K.



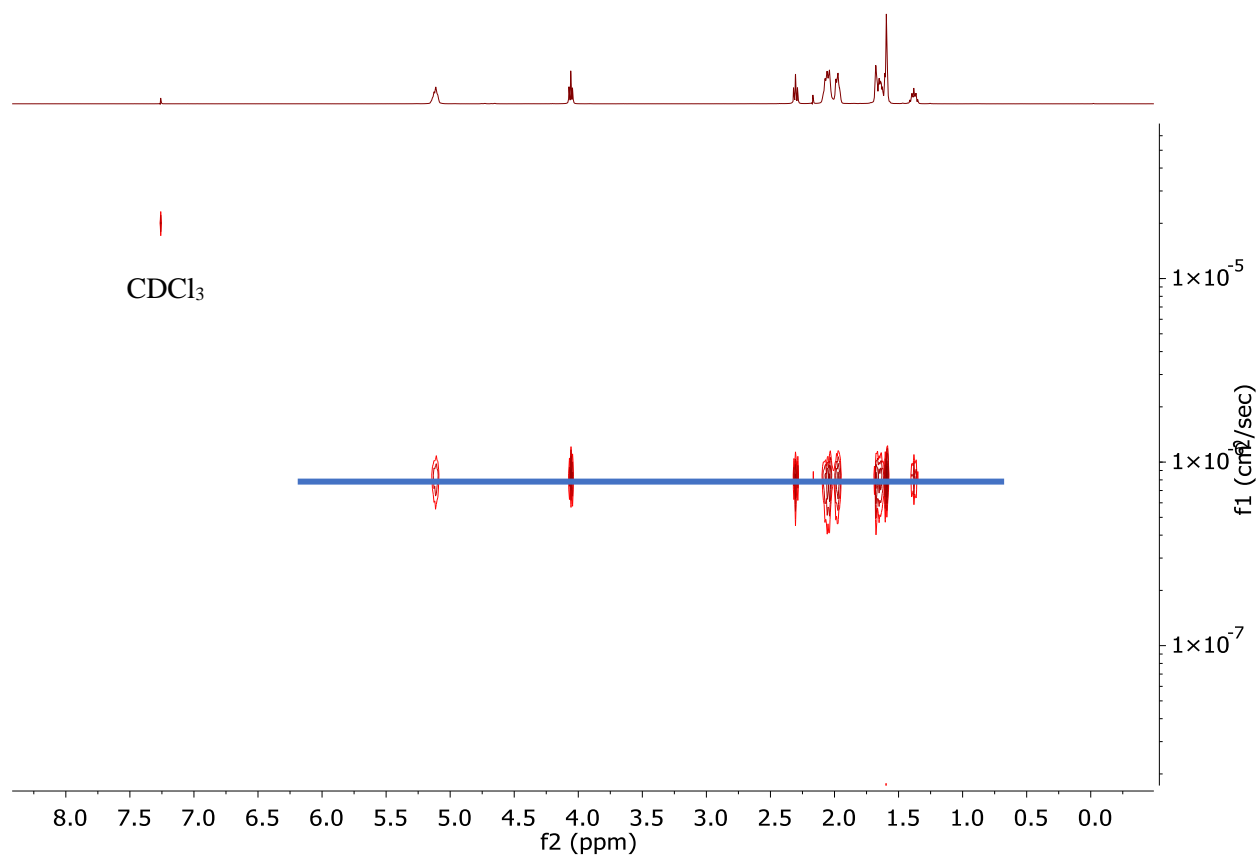

**Fig. S99** DOSY NMR spectrum of PIP-*b*-PCL 800:300 equivalents generated by **6** and 0.5 equivalents of [Ph<sub>3</sub>C][B(C<sub>6</sub>F<sub>5</sub>)<sub>4</sub>] from **Table 3**, entry 3c in CDCl<sub>3</sub> at 298 K.

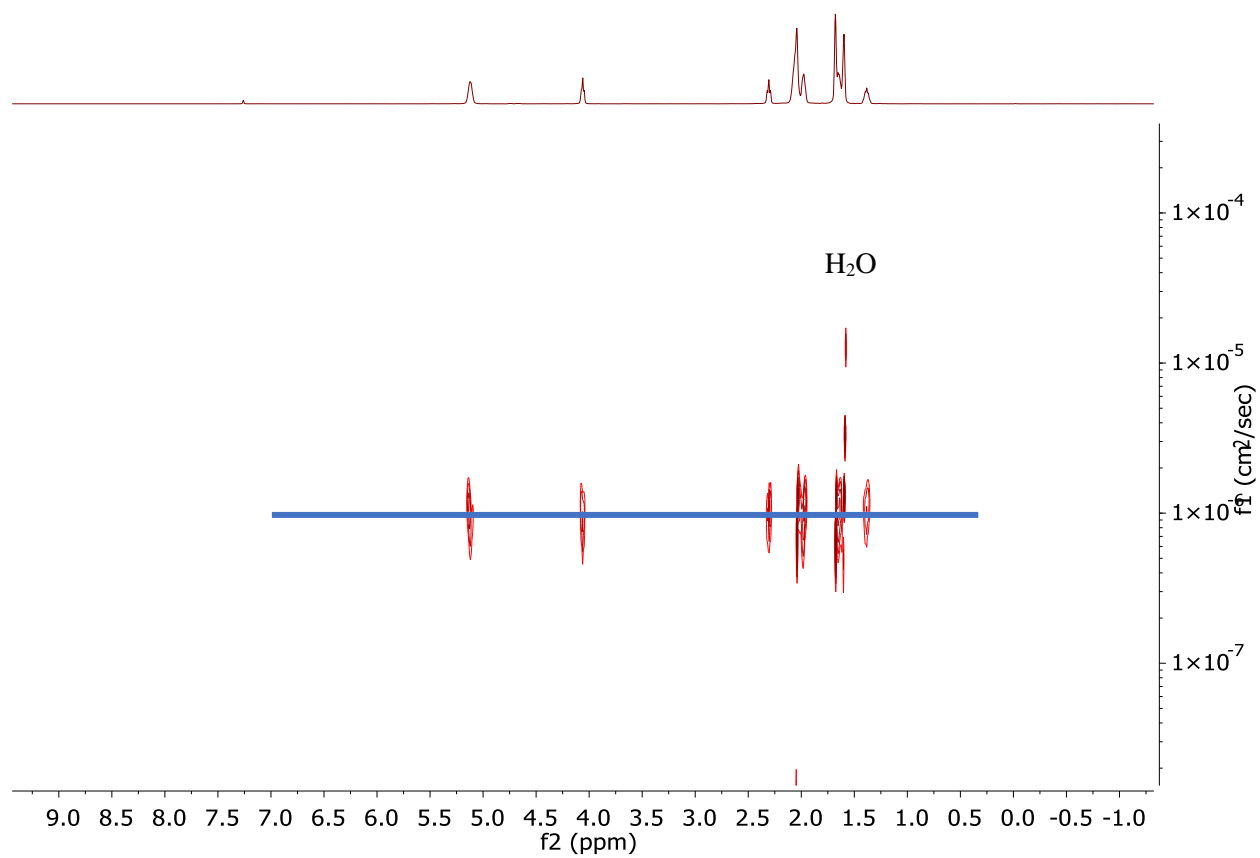

**Fig. S100** DOSY NMR spectrum of PIP-*b*-PCL 800:300 equivalents generated by **6** and 1.5 equivalents of  $[\text{Ph}_3\text{C}][\text{B}(\text{C}_6\text{F}_5)_4]$  from **Table 3**, entry 4a in  $\text{CDCl}_3$  at 298 K.

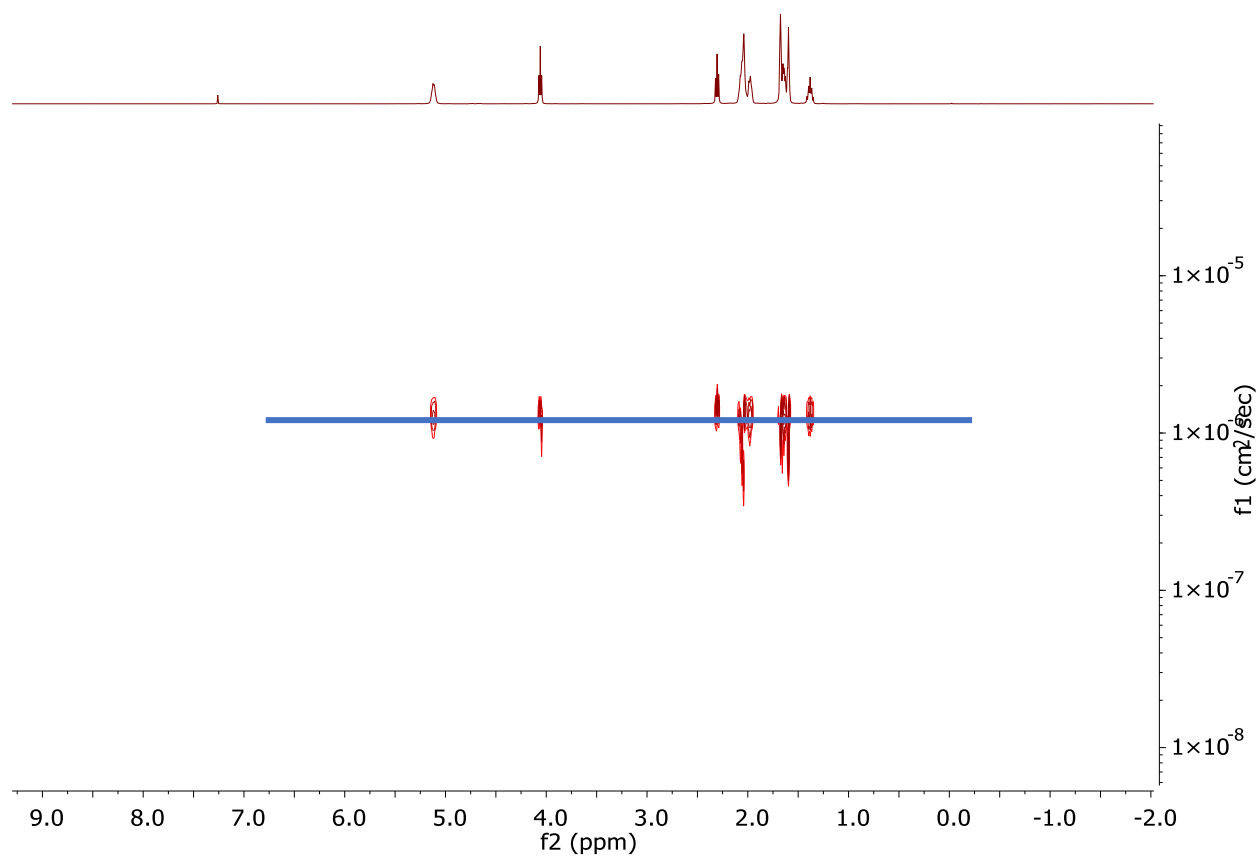

**Fig. S101** DOSY NMR spectrum of PIP-*b*-PCL 800:300 equivalents generated by **6** and 1.5 equivalents of [Ph<sub>3</sub>C][B(C<sub>6</sub>F<sub>5</sub>)<sub>4</sub>] from **Table 3**, entry 4b in CDCl<sub>3</sub> at 298 K.

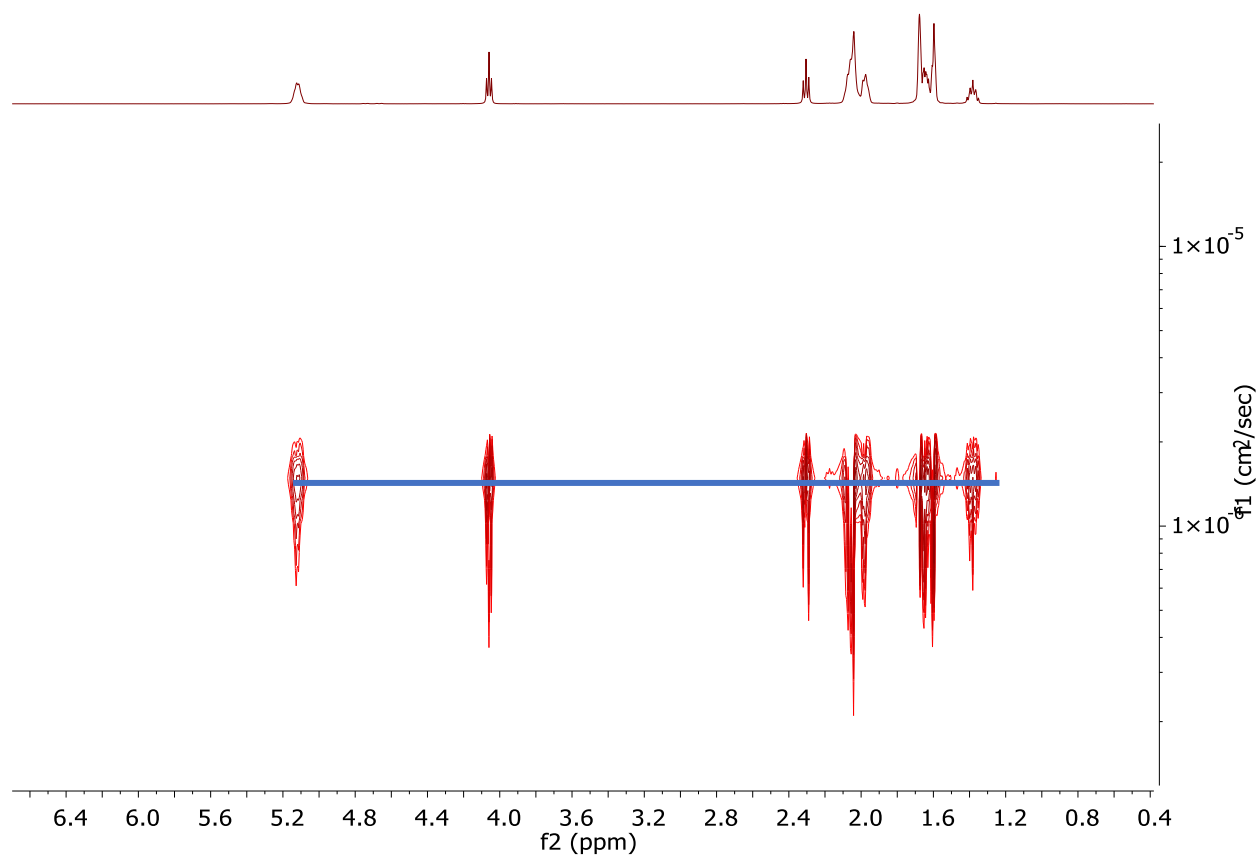

**Fig. S102** DOSY NMR spectrum of PIP-*b*-PCL 800:300 equivalents generated by **6** and 1.5 equivalents of  $[\text{Ph}_3\text{C}][\text{B}(\text{C}_6\text{F}_5)_4]$  from **Table 3**, entry 4c in  $\text{CDCl}_3$  at 298 K.

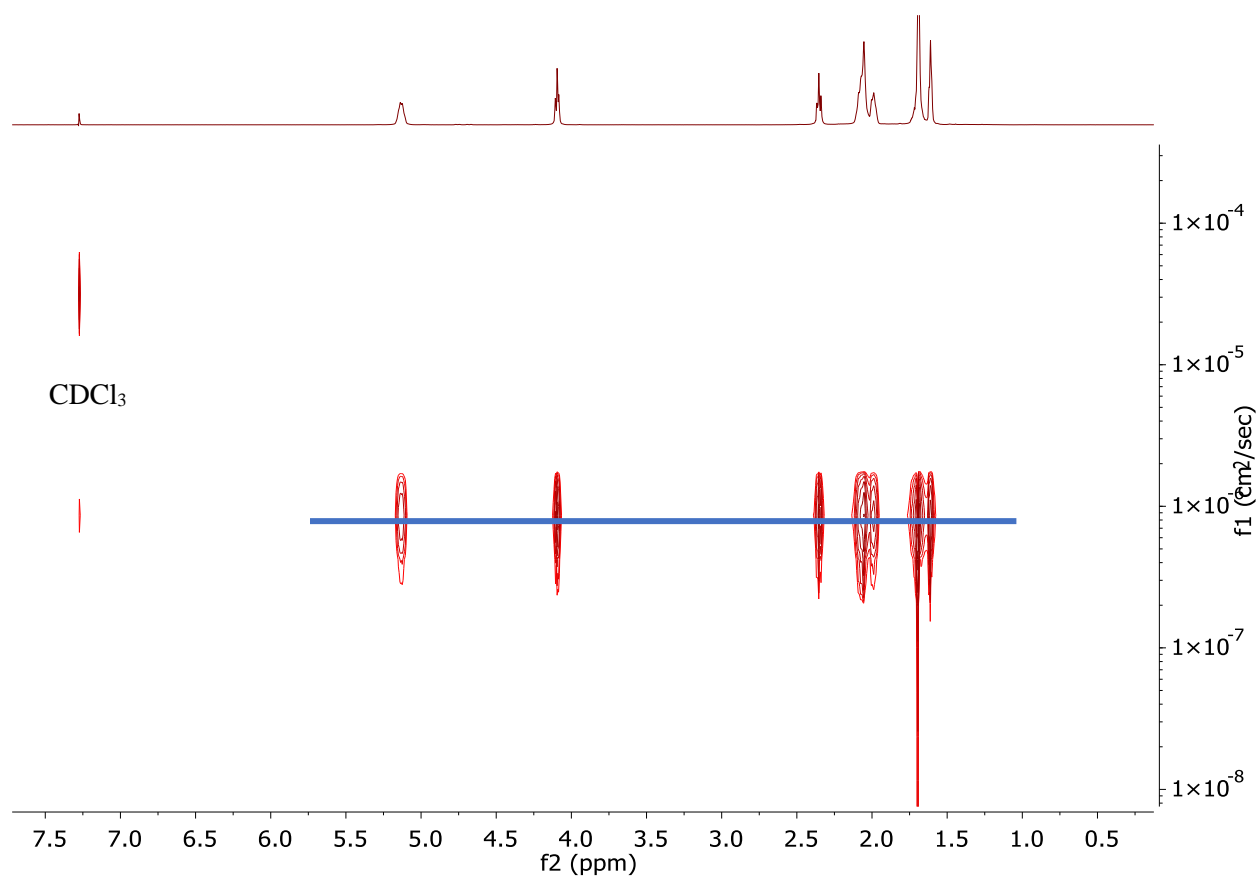

**Fig. S103** DOSY NMR spectrum of PIP-*b*-PVL 800:300 equivalents generated by **6**/[Ph<sub>3</sub>C][B(C<sub>6</sub>F<sub>5</sub>)<sub>4</sub>] from **Table 5**, entry 1 in CDCl<sub>3</sub> at 298 K.

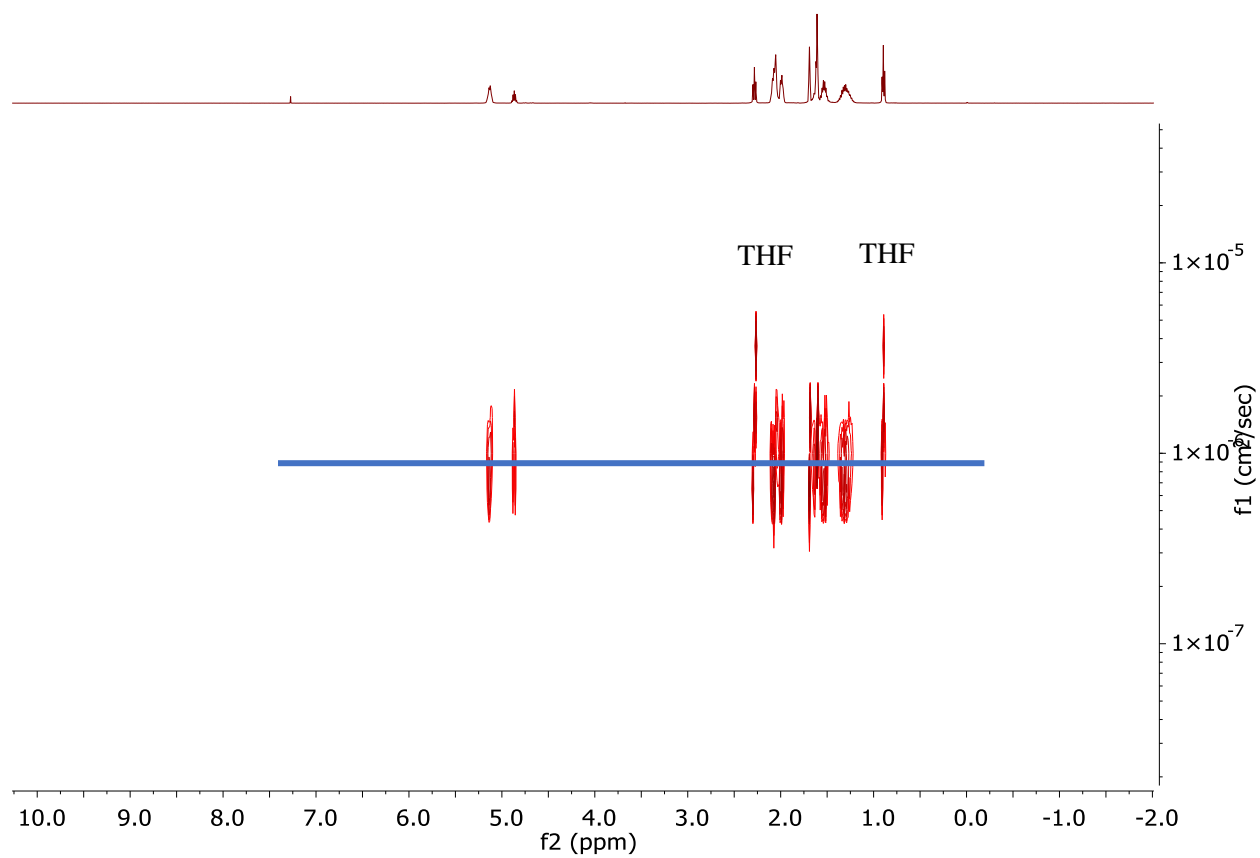

**Fig. S104** DOSY NMR spectrum of PIP-*b*-PDL 800:300 equivalents generated by **6**/[Ph<sub>3</sub>C][B(C<sub>6</sub>F<sub>5</sub>)<sub>4</sub>] from **Table 5**, entry 2 in CDCl<sub>3</sub> at 298 K.

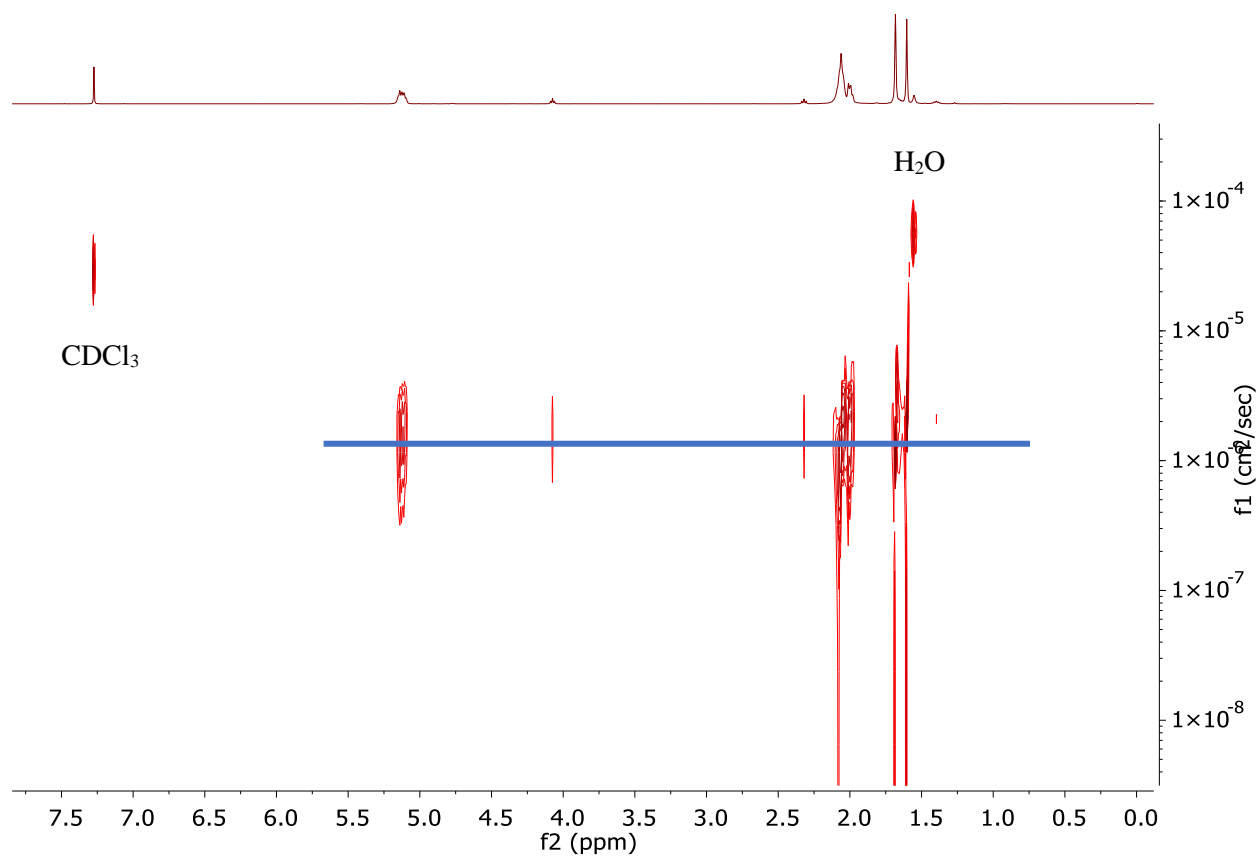

**Fig. S105** DOSY NMR spectrum of PMyr-*b*-PCL 800:300 equivalents generated by **6**/[Ph<sub>3</sub>C][B(C<sub>6</sub>F<sub>5</sub>)<sub>4</sub>] from **Table 5**, entry 3 in CDCl<sub>3</sub> at 298 K.

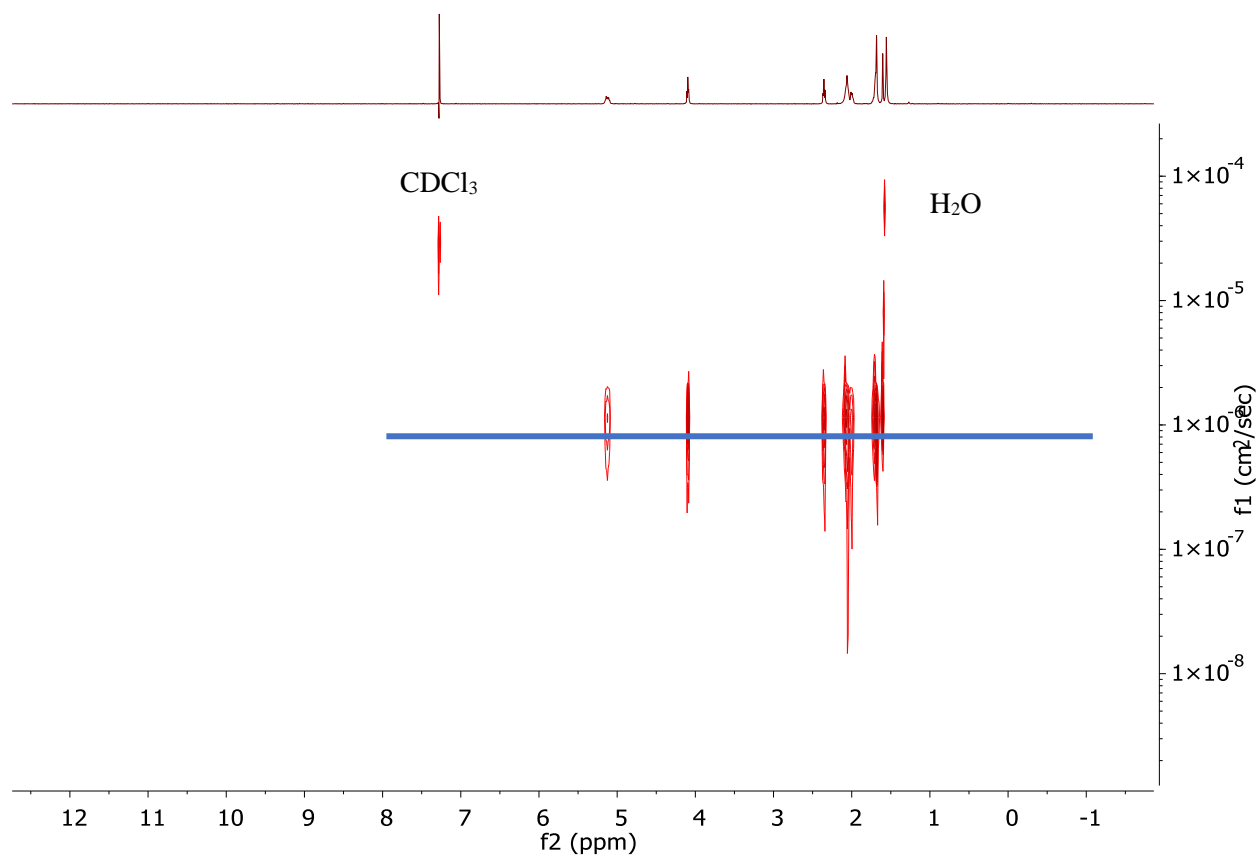

**Fig. S106** DOSY NMR spectrum of PMyr-*b*-PVL 800:300 equivalents generated by **6**/[Ph<sub>3</sub>C][B(C<sub>6</sub>F<sub>5</sub>)<sub>4</sub>] from **Table 5**, entry 3 in CDCl<sub>3</sub> at 298 K.



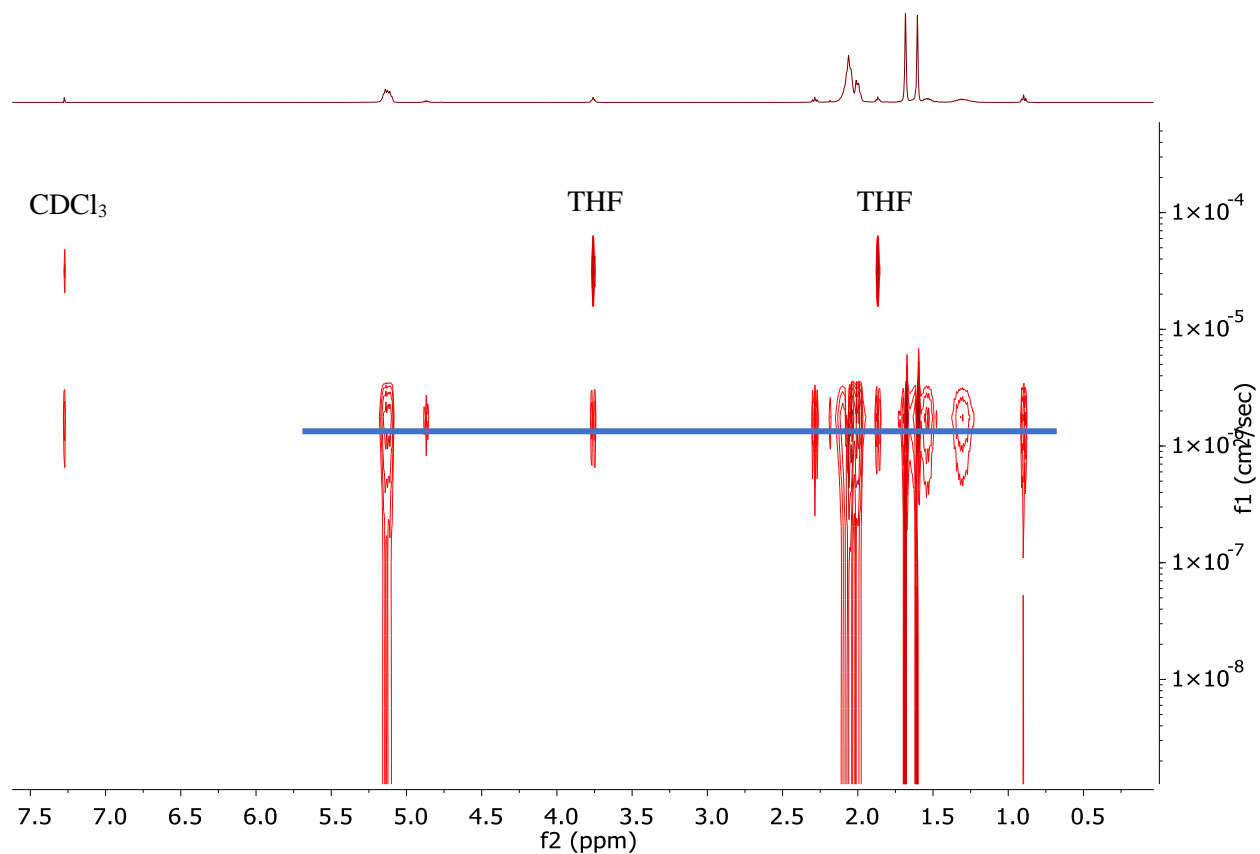

**Fig. S107** DOSY NMR spectrum of PMyr-*b*-PDL 800:300 equivalents generated by **6**/[Ph<sub>3</sub>C][B(C<sub>6</sub>F<sub>5</sub>)<sub>4</sub>] from **Table 5**, entry 5 in CDCl<sub>3</sub> at 298 K.

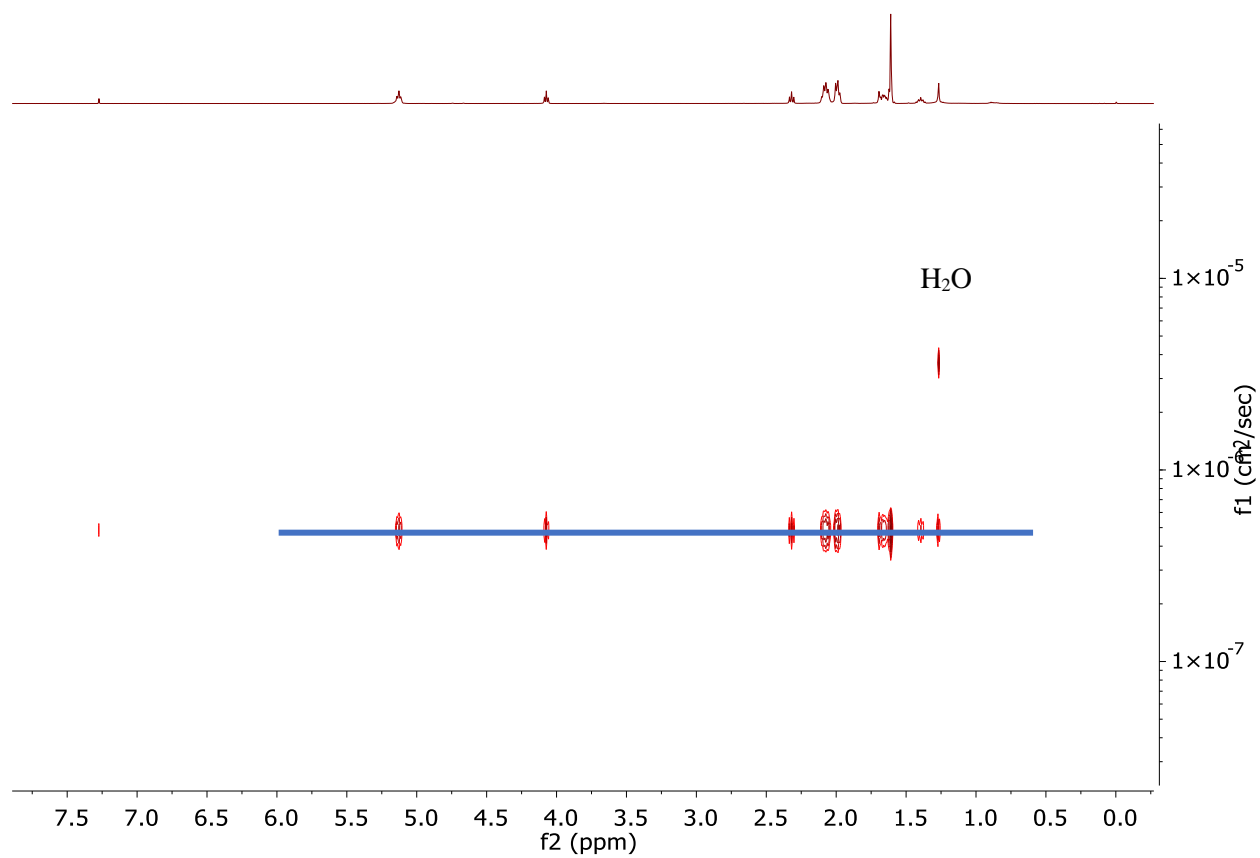

**Fig. S108** DOSY NMR spectrum of PIP-*b*-PCL 50:50 equivalents generated by **6**/[Ph<sub>3</sub>C][B(C<sub>6</sub>F<sub>5</sub>)<sub>4</sub>] of from **Table S3**, entry 2 in CDCl<sub>3</sub> at 298 K.

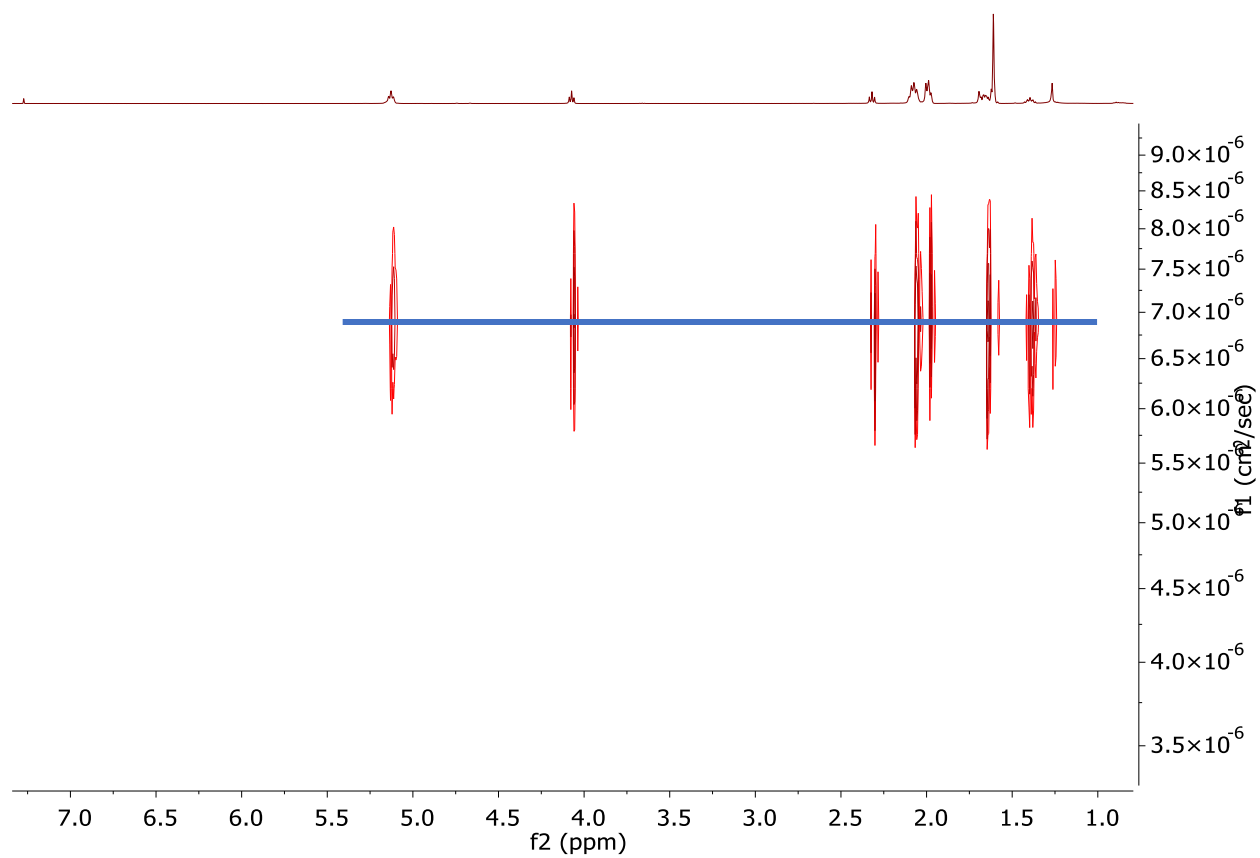

**Fig. S109** DOSY NMR spectrum of repolymerized PIP-*b*-PCL 50:50 equivalents generated by  $\text{Y}[\text{N}(\text{SiMe}_3)_2]_3$  from **Table S3**, entry 4 in  $\text{CDCl}_3$  at 298 K.

#### 4.0 Fourier-Transform Infrared Spectroscopy (FT-IR) Characterization of Isolated Polymers.

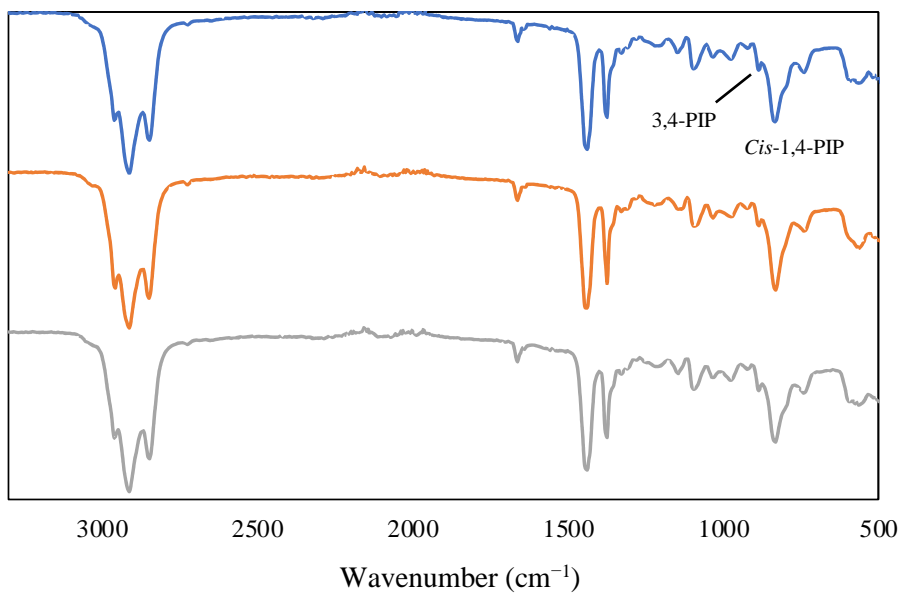

**Fig. S110** FT-IR spectrum of PIP 800 equivalents generated by **6**/[Ph<sub>3</sub>C][B(C<sub>6</sub>F<sub>5</sub>)<sub>4</sub>] from **Table 1**, entry 1 (12 h). Representative 3,4 PIP and *cis*-1,4 PIP peaks shown.

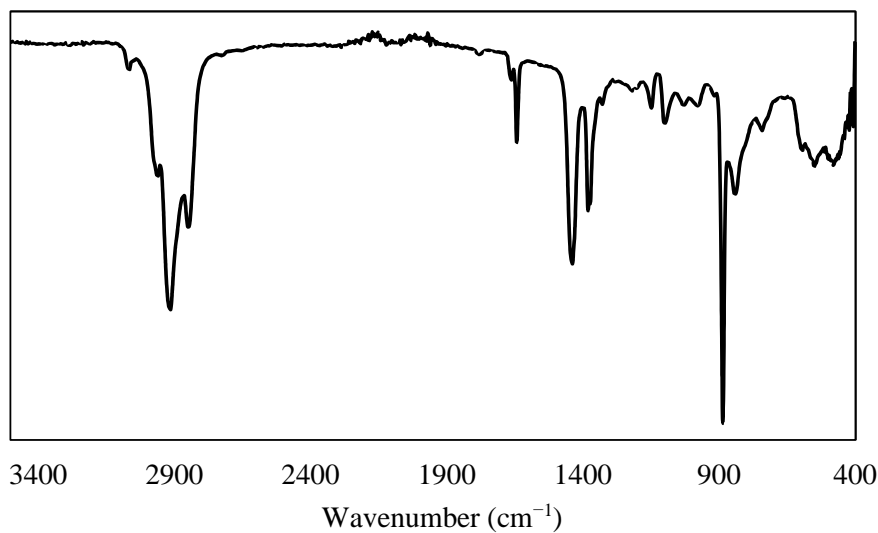

**Fig. S111** FT-IR spectrum of PIP 800 equivalents generated by **8**/[Ph<sub>3</sub>C][B(C<sub>6</sub>F<sub>5</sub>)<sub>4</sub>] from **Table 1**, entry 3 (12 h).

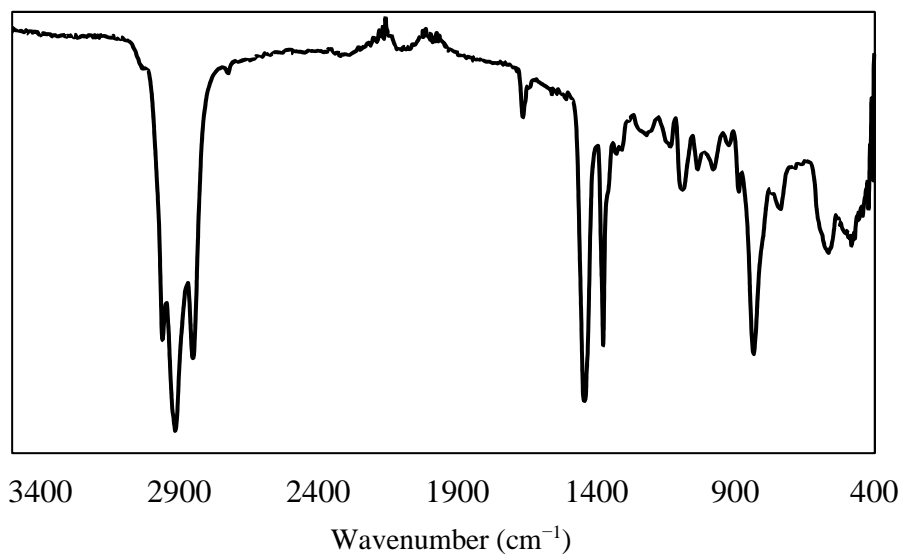

**Fig. S112** FT-IR spectrum of PIP 800 equivalents generated by **6**/[Ph<sub>3</sub>C][B(C<sub>6</sub>F<sub>5</sub>)<sub>4</sub>] from **Table 1**, entry 4 (24 h).

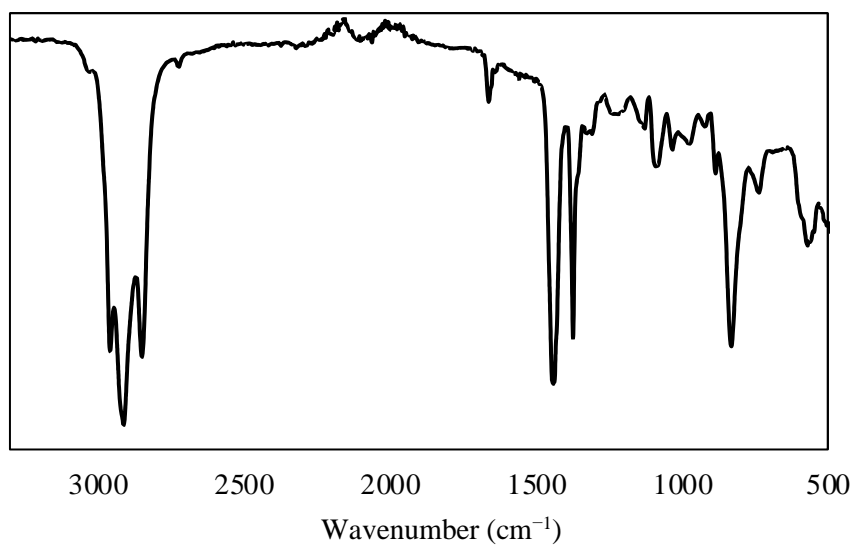

**Fig. S113** FT-IR spectrum of PIP 800 equivalents generated by **6**/[Ph<sub>3</sub>C][B(C<sub>6</sub>F<sub>5</sub>)<sub>4</sub>] from **Table 1**, entry 5 (30 min).

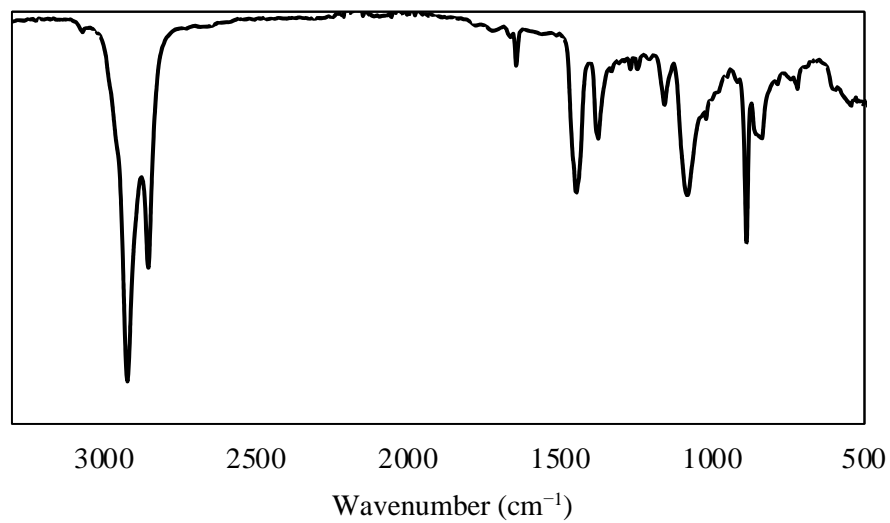

**Fig. S114** FT-IR spectrum of PIP generated by **8**/[Ph<sub>3</sub>C][B(C<sub>6</sub>F<sub>5</sub>)<sub>4</sub>] from **Table 1**, entry 6 (30 min).

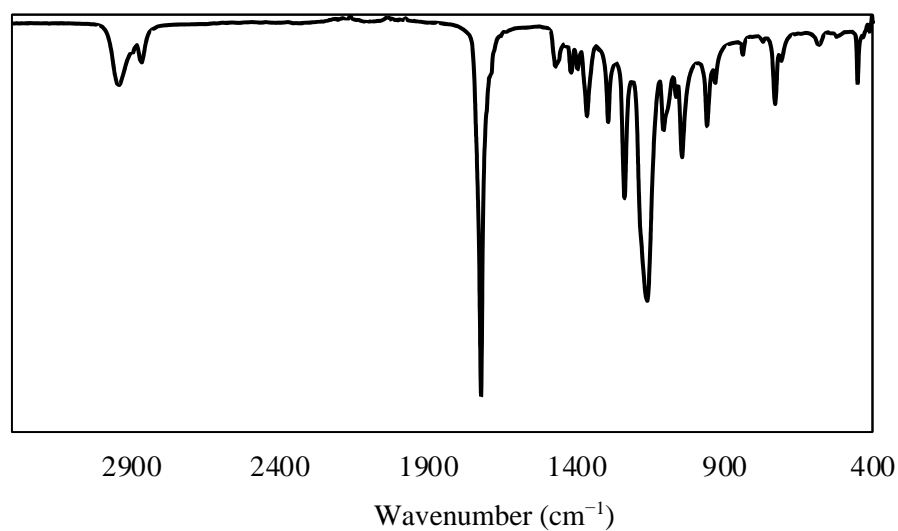

**Fig. S115** FT-IR spectrum of PCL generated by **6**/[Ph<sub>3</sub>C][B(C<sub>6</sub>F<sub>5</sub>)<sub>4</sub>] from **Table 1**, entry 7 (10 min).

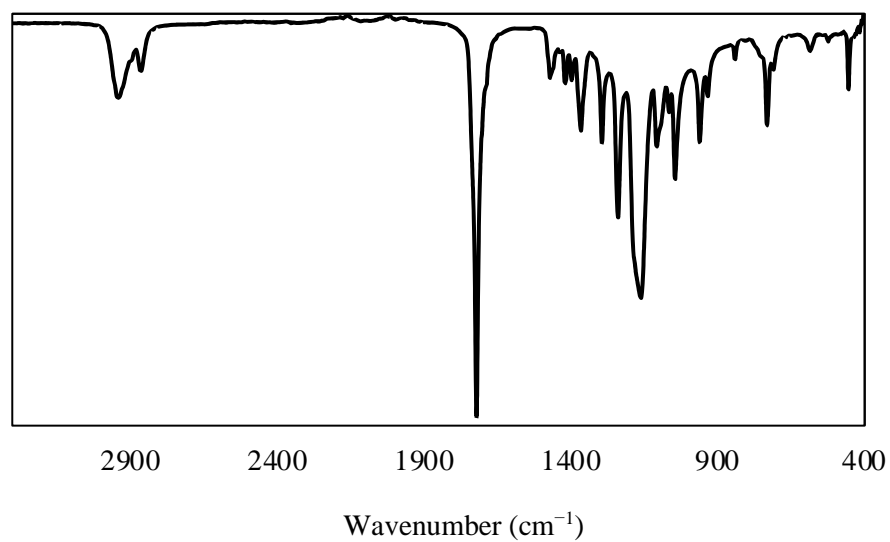

**Fig. S116** FT-IR spectrum of PCL 300 equivalents generated by **8**/[Ph<sub>3</sub>C][B(C<sub>6</sub>F<sub>5</sub>)<sub>4</sub>] from **Table 1**, entry 8 (10 min).

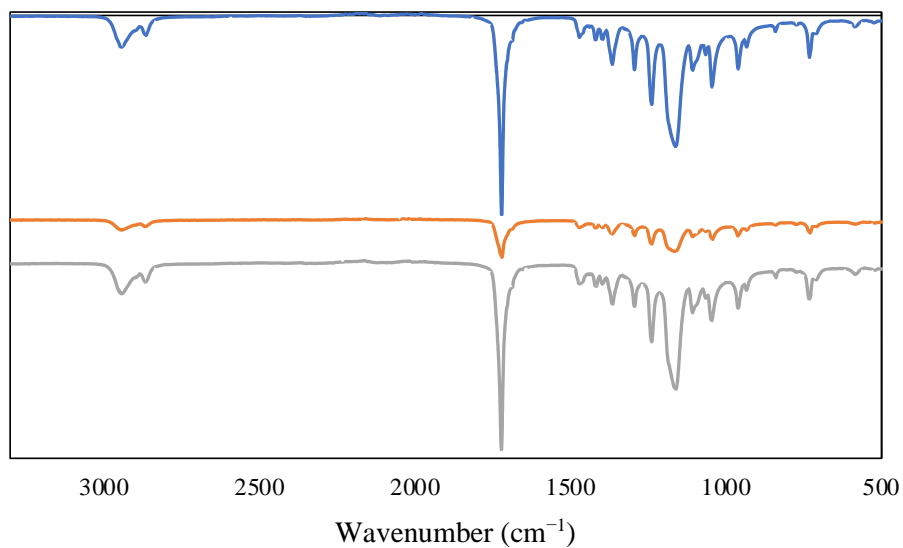

**Fig. S117** FT-IR spectrum of PCL 300 equivalents generated by **6**/[Ph<sub>3</sub>C][B(C<sub>6</sub>F<sub>5</sub>)<sub>4</sub>] from **Table 1**, entry 9 (2 h).

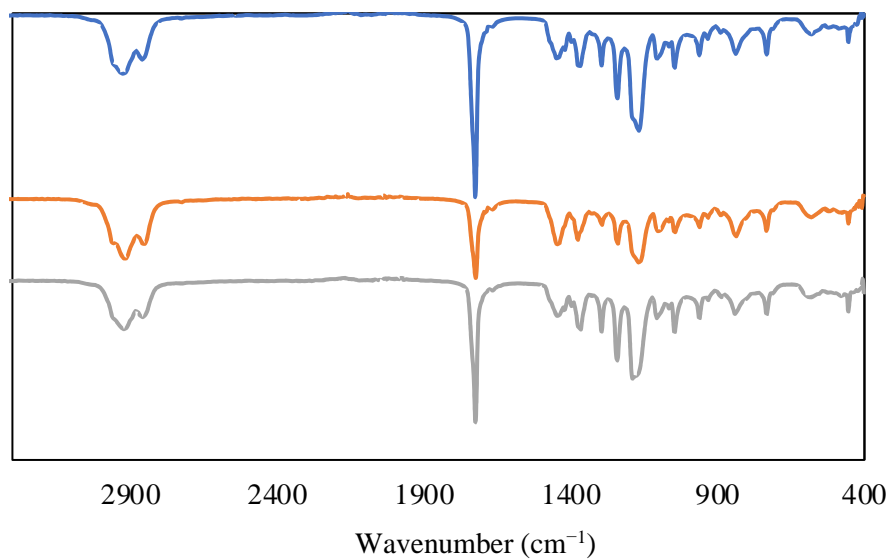

**Fig. S118** FT-IR spectrum of PIP-*b*-PCL 800:300 equivalents generated by **6**/[Ph<sub>3</sub>C][B(C<sub>6</sub>F<sub>5</sub>)<sub>4</sub>] from **Table 2**, entry 1.

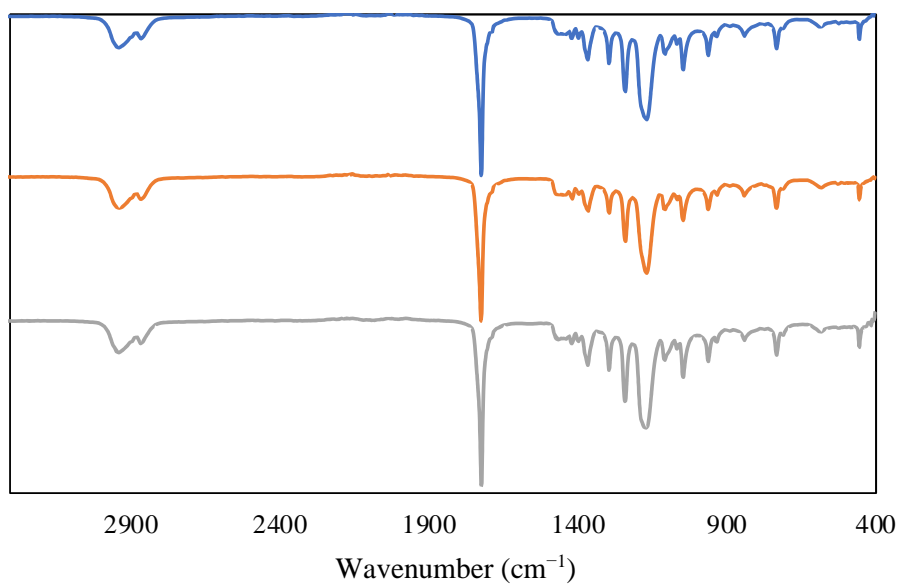

**Fig. S119** FT-IR spectrum of PIP-*b*-PCL 550:550 equivalents generated by **6**/[Ph<sub>3</sub>C][B(C<sub>6</sub>F<sub>5</sub>)<sub>4</sub>] from **Table 2**, entry 2.



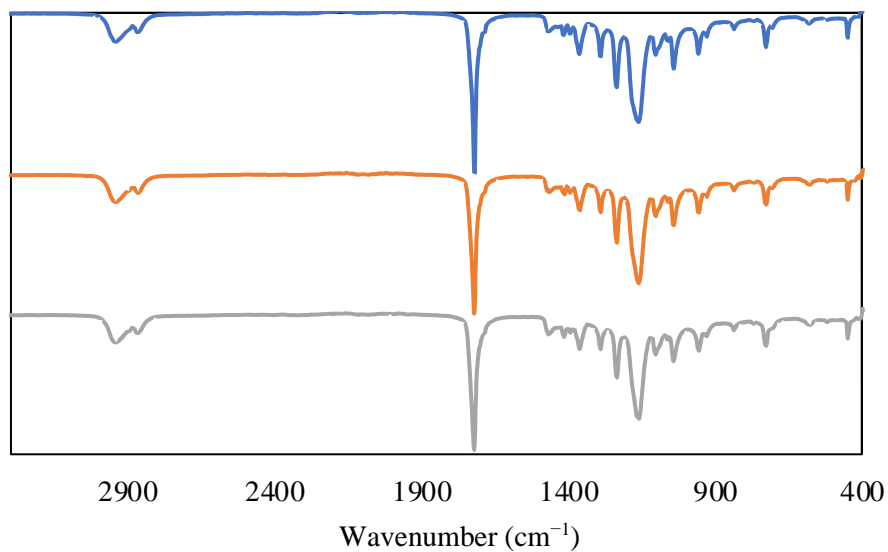

**Fig. S120** FT-IR spectrum of PIP-*b*-PCL 300:800 equivalents generated by **6**/[Ph<sub>3</sub>C][B(C<sub>6</sub>F<sub>5</sub>)<sub>4</sub>] from **Table 2**, entry 3.

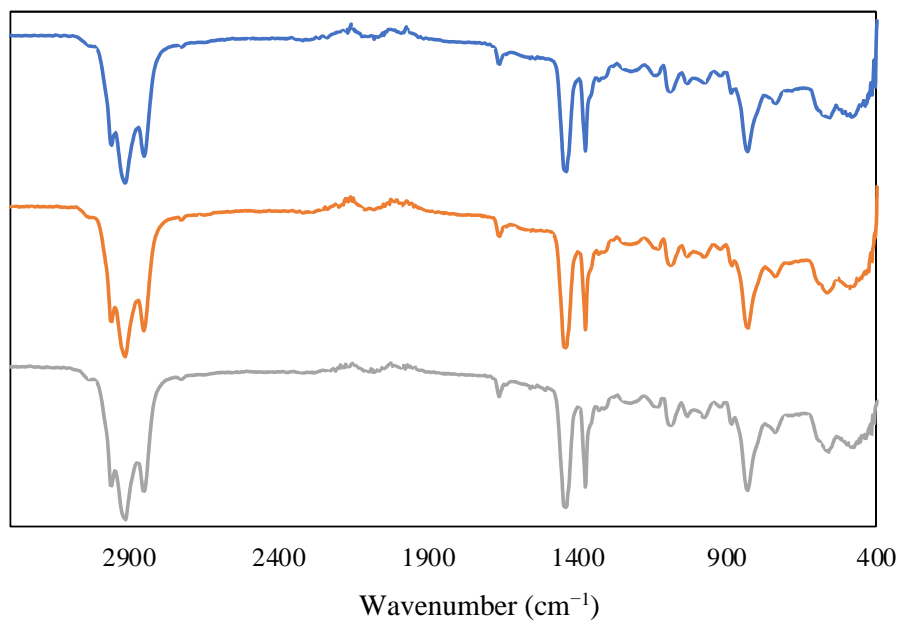

**Fig. S121** FT-IR spectrum of PIP 800 equivalents generated by **6**/[Ph<sub>3</sub>C][B(C<sub>6</sub>F<sub>5</sub>)<sub>4</sub>] from **Table 3**, entry 1 (IP addition time 0 min).

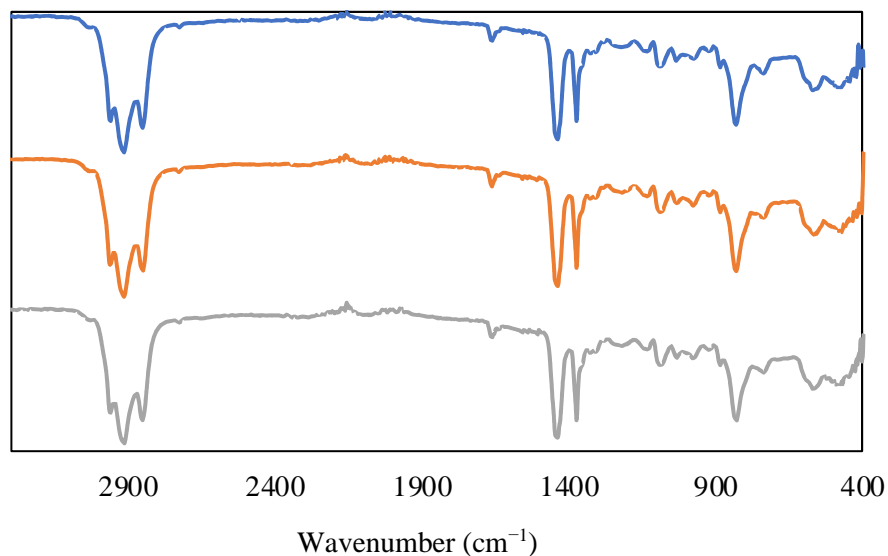

**Fig. S122** FT-IR spectrum of PIP 800 equivalents generated by **6**/[Ph<sub>3</sub>C][B(C<sub>6</sub>F<sub>5</sub>)<sub>4</sub>] from **Table 3**, entry 2 (IP addition time 30 min).

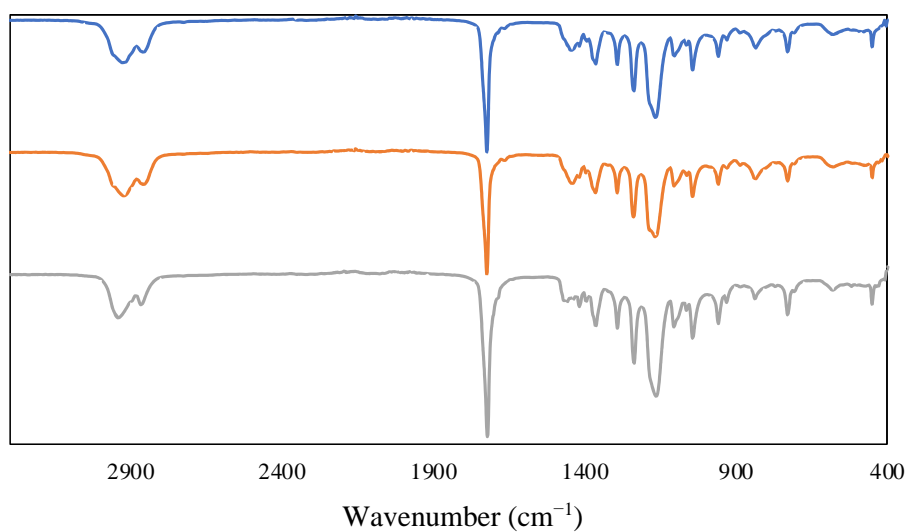

**Fig. S123** FT-IR spectrum of PIP-*b*-PCL 800:300 equivalents generated by **6** and 0.5 equivalents of [Ph<sub>3</sub>C][B(C<sub>6</sub>F<sub>5</sub>)<sub>4</sub>] from **Table 3**, entry 3.

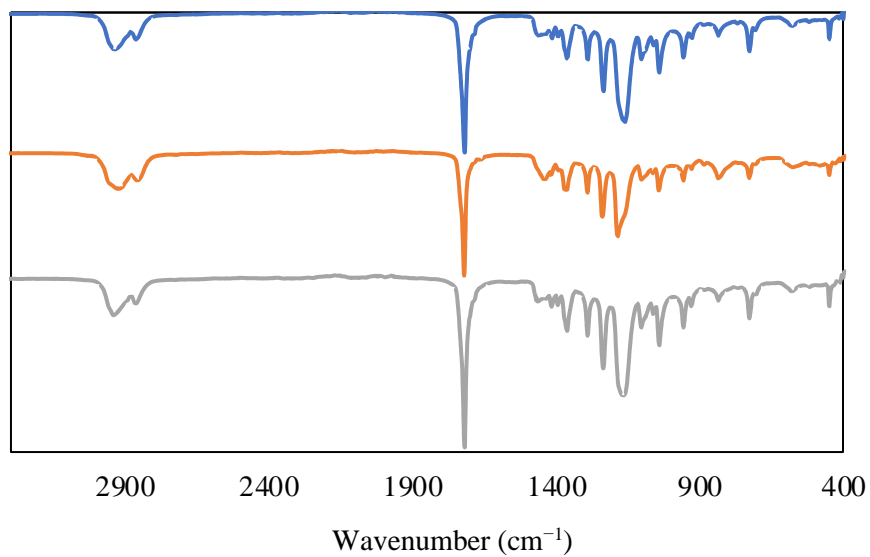

**Fig. S124** FT-IR spectrum of PIP-*b*-PCL 800:300 equivalents generated by **6** and 1.5 equivalents of  $[\text{Ph}_3\text{C}][\text{B}(\text{C}_6\text{F}_5)_4]$  from **Table 3**, entry 4.

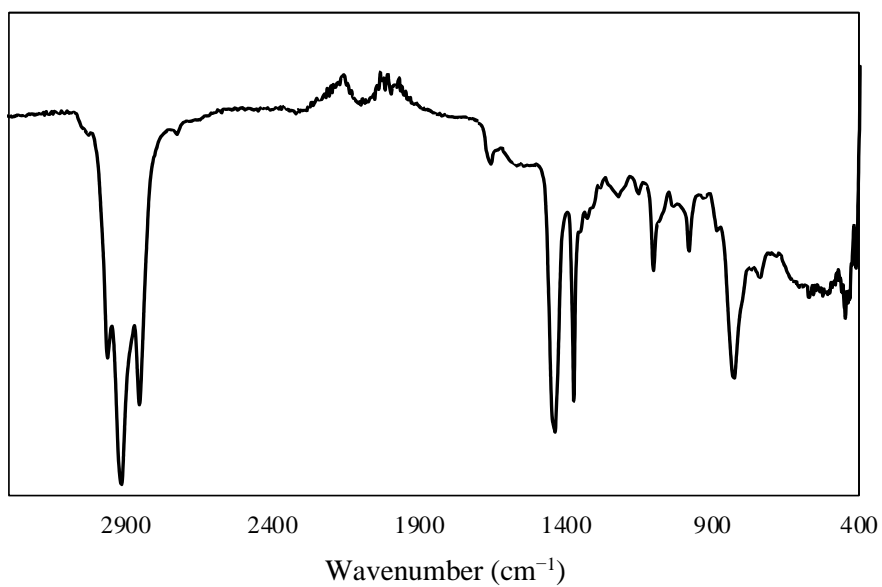

**Fig. S125** FT-IR spectrum of PMyr 800 equivalents generated by **6**/ $[\text{Ph}_3\text{C}][\text{B}(\text{C}_6\text{F}_5)_4]$  from **Table 4**, entry 1 (30 min).

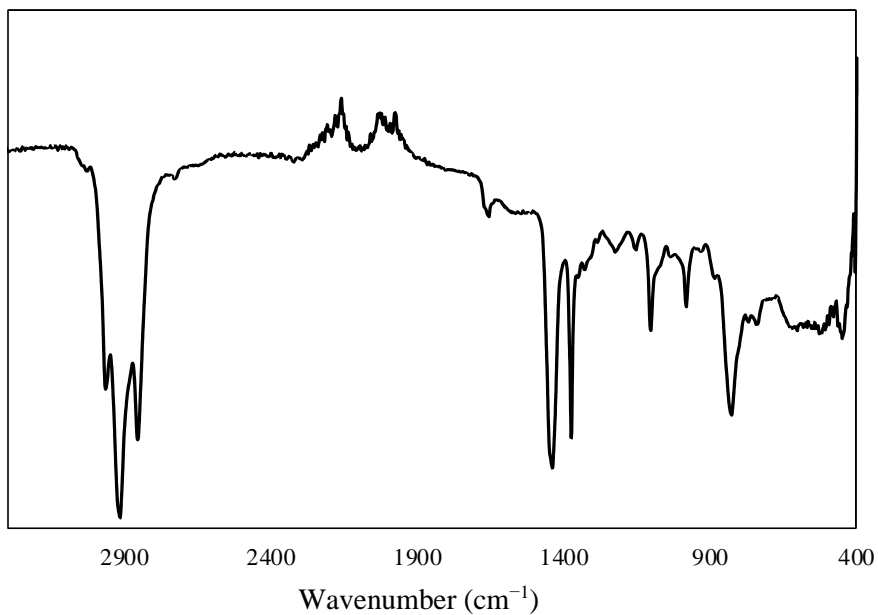

**Fig. S126** FT-IR spectrum of PMyr 800 equivalents generated by **6**/[Ph<sub>3</sub>C][B(C<sub>6</sub>F<sub>5</sub>)<sub>4</sub>] from **Table 4**, entry 2 (90 min).

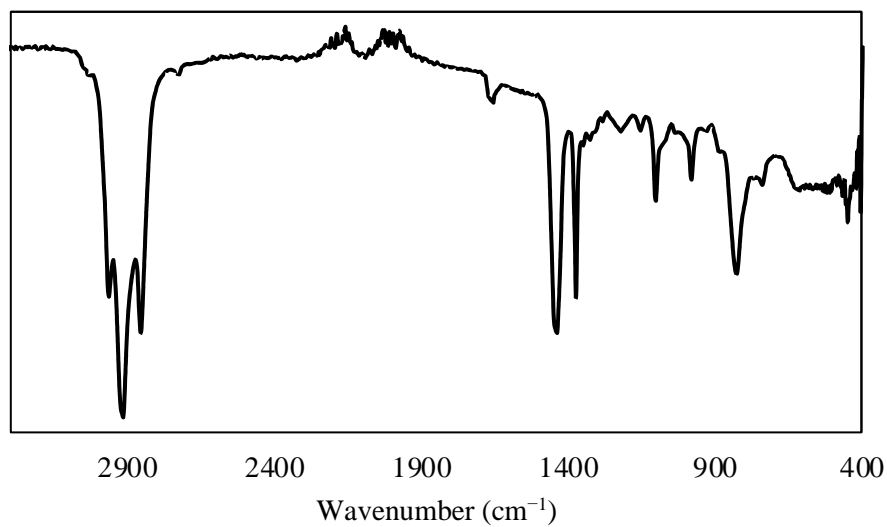

**Fig. S127** FT-IR spectrum of PMyr 800 equivalents generated by **6**/[Ph<sub>3</sub>C][B(C<sub>6</sub>F<sub>5</sub>)<sub>4</sub>] from **Table 4**, entry 3 (3 h).

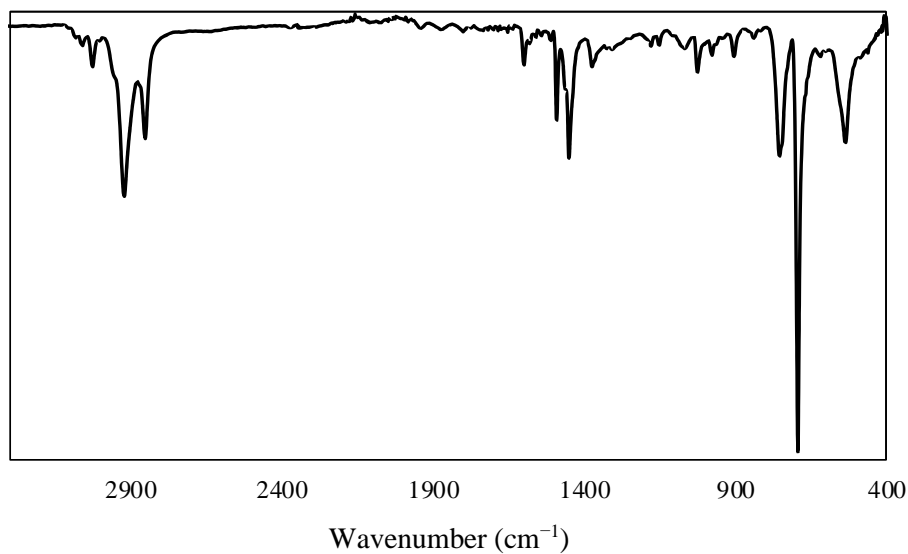

**Fig. S128** FT-IR spectrum of PS 800 equivalents generated by **6**/[Ph<sub>3</sub>C][B(C<sub>6</sub>F<sub>5</sub>)<sub>4</sub>] from **Table 4**, entry 4 (30 min).

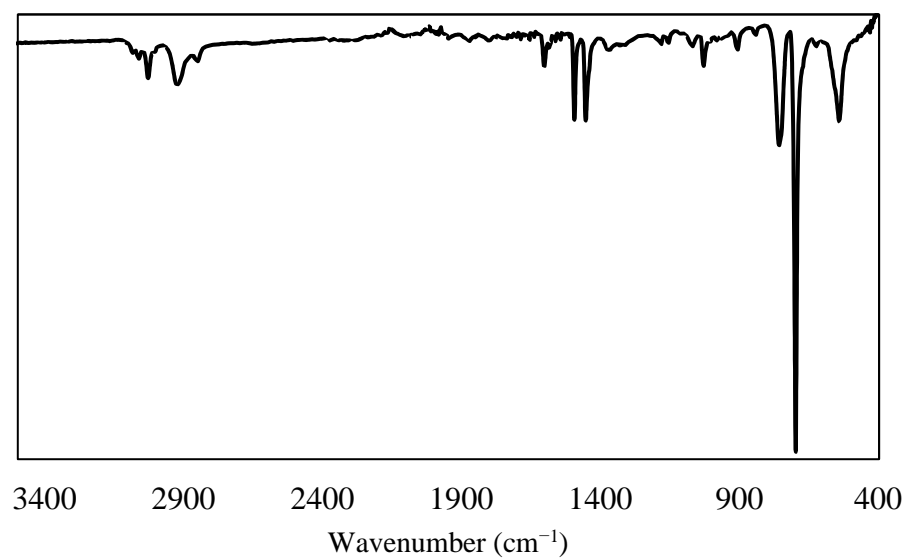

**Fig. S129** FT-IR spectrum of PS 800 equivalents generated by **6**/[Ph<sub>3</sub>C][B(C<sub>6</sub>F<sub>5</sub>)<sub>4</sub>] from **Table 4**, entry 5 (20 h).

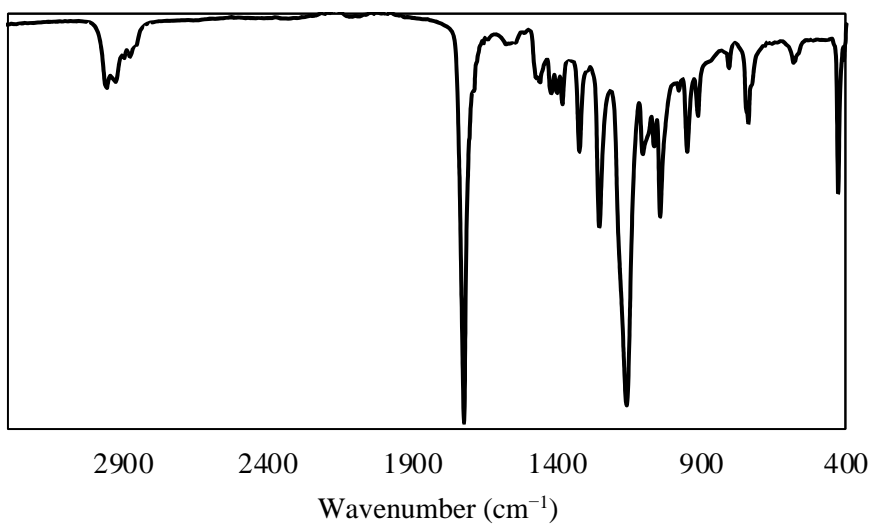

**Fig. S130** FT-IR spectrum of PVL 300 equivalents generated by **6**/[Ph<sub>3</sub>C][B(C<sub>6</sub>F<sub>5</sub>)<sub>4</sub>] from **Table 4**, entry 6 (10 min).

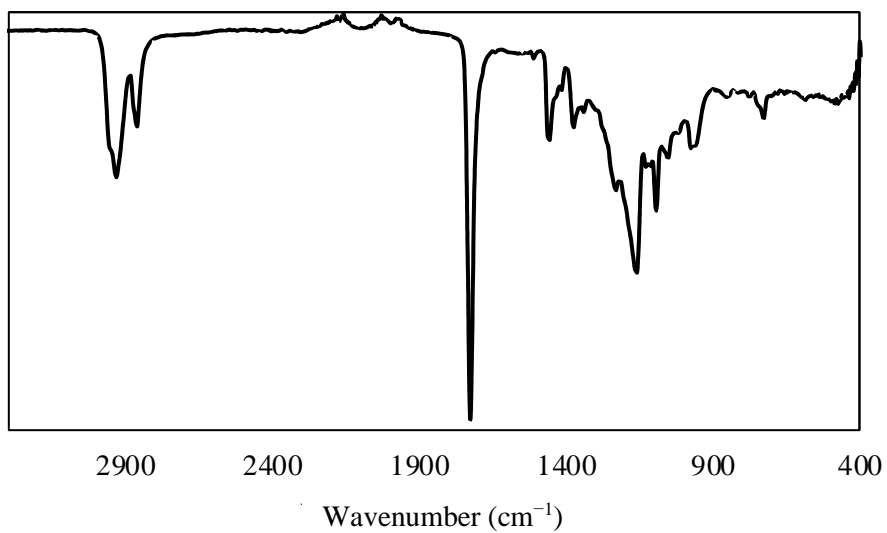

**Fig. S131** FT-IR spectrum of PDL 300 equivalents generated by **6**/[Ph<sub>3</sub>C][B(C<sub>6</sub>F<sub>5</sub>)<sub>4</sub>] from **Table 4**, entry 7 (6 h).

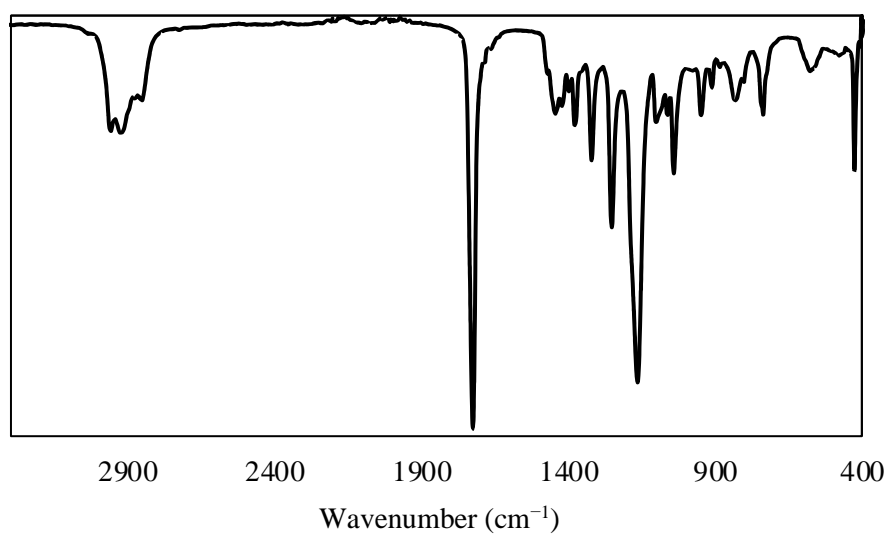

**Fig. S132** FT-IR spectrum of PIP-*b*-PVL 800:300 equivalents generated by **6**/[Ph<sub>3</sub>C][B(C<sub>6</sub>F<sub>5</sub>)<sub>4</sub>] from **Table 5**, entry 1.

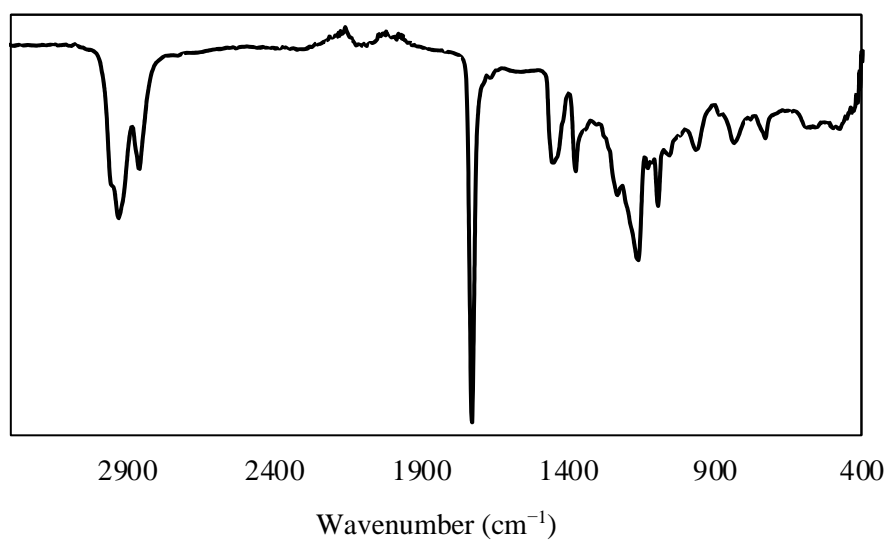

**Fig. S133** FT-IR spectrum of PIP-*b*-PDL 800:300 equivalents generated by **6**/[Ph<sub>3</sub>C][B(C<sub>6</sub>F<sub>5</sub>)<sub>4</sub>] from **Table 5**, entry 2.

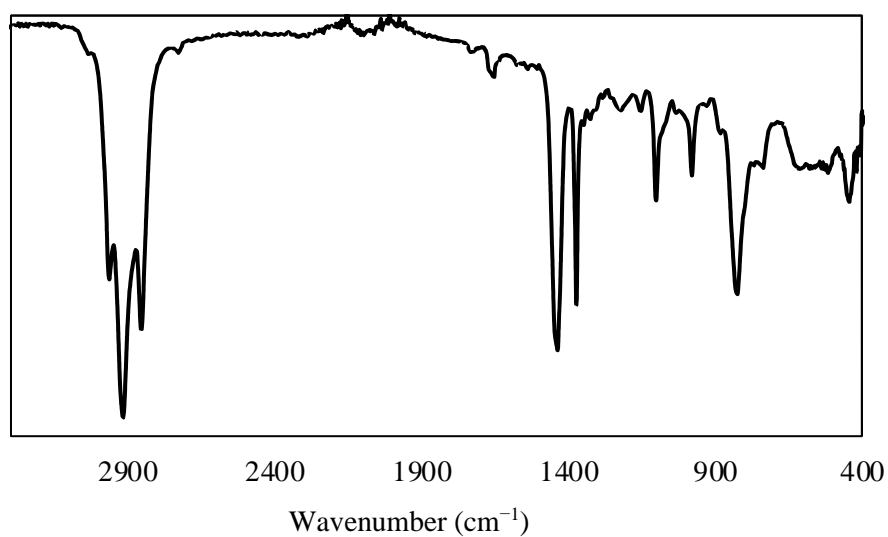

**Fig. S134** FT-IR spectrum of PMyr-*b*-PCL 800:300 equivalents generated by **6**/[Ph<sub>3</sub>C][B(C<sub>6</sub>F<sub>5</sub>)<sub>4</sub>] from Table 5, entry 3.

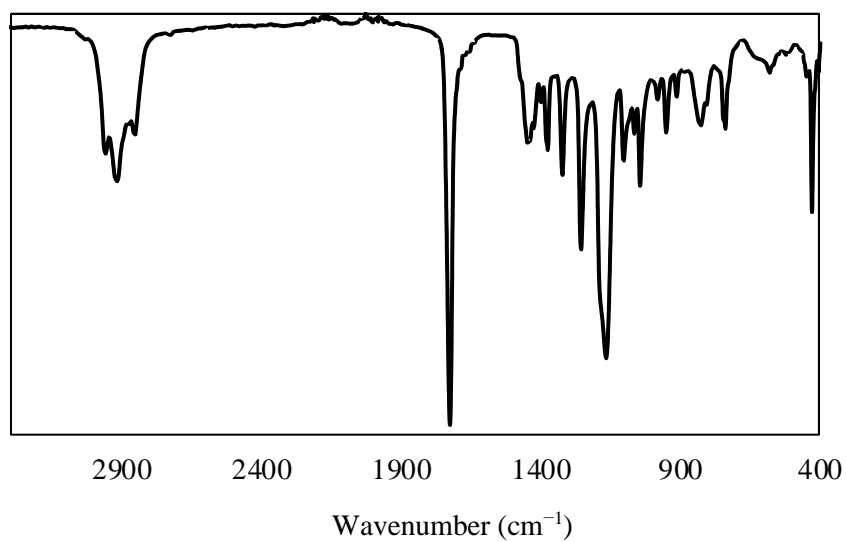

**Fig. S135** FT-IR spectrum of PMyr-*b*-PVL 800:300 equivalents generated by **6**/[Ph<sub>3</sub>C][B(C<sub>6</sub>F<sub>5</sub>)<sub>4</sub>] from Table 5, entry 4.



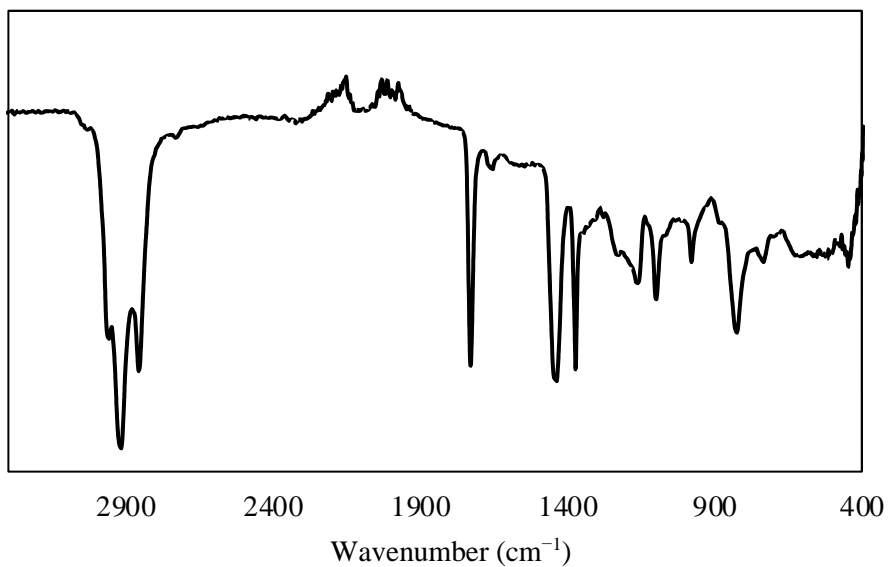

**Fig. S136** FT-IR spectrum of PMyr-*b*-PDL 800:300 equivalents generated by **6**/[Ph<sub>3</sub>C][B(C<sub>6</sub>F<sub>5</sub>)<sub>4</sub>] from **Table 5**, entry 5.

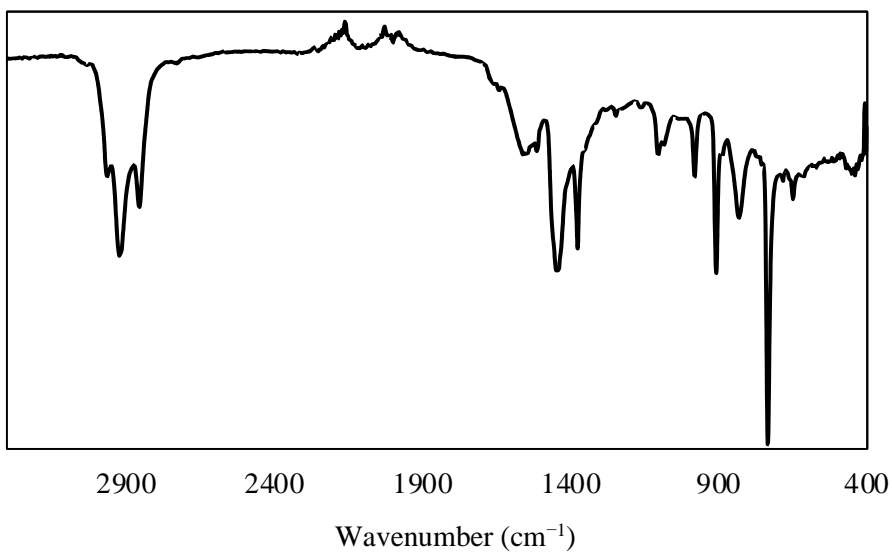

**Fig. S137** FT-IR spectrum of PMyr 800 equivalents generated by **8**/[Ph<sub>3</sub>C][B(C<sub>6</sub>F<sub>5</sub>)<sub>4</sub>] from **Table S1**, entry 1 (30 min).

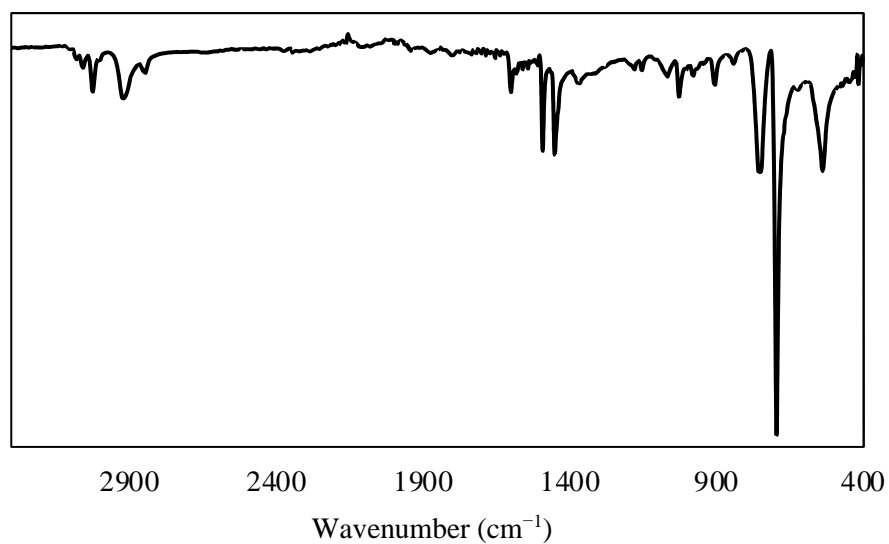

**Fig. S138** FT-IR spectrum of PS 800 equivalents generated by **8**/[Ph<sub>3</sub>C][B(C<sub>6</sub>F<sub>5</sub>)<sub>4</sub>] from **Table S1**, entry 2 (30 min).

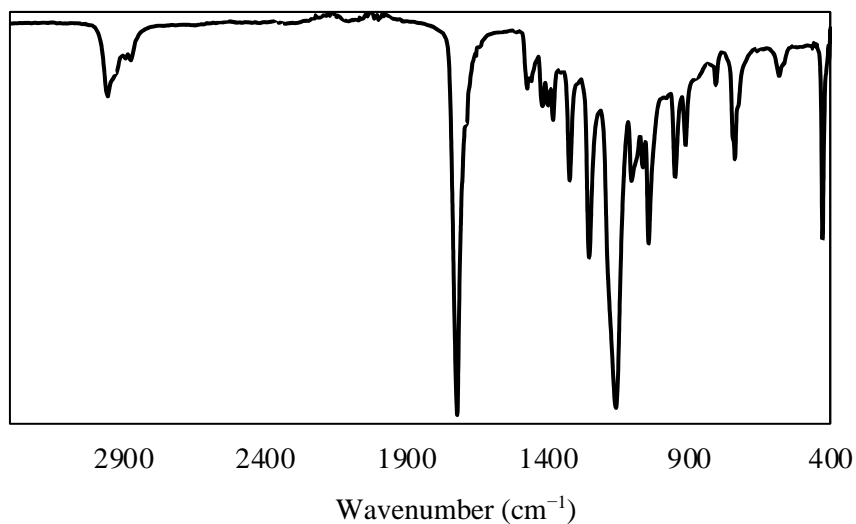

**Fig. S139** FT-IR spectrum of PVL 300 equivalents generated by **8**/[Ph<sub>3</sub>C][B(C<sub>6</sub>F<sub>5</sub>)<sub>4</sub>] from **Table S1**, entry 3 (10 min).

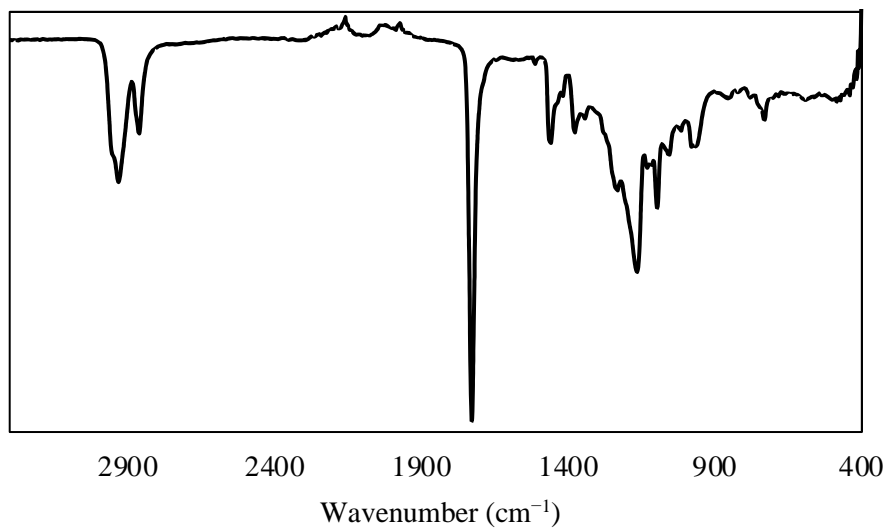

**Fig. S140** FT-IR spectrum of PDL 300 equivalents generated by **8**/[Ph<sub>3</sub>C][B(C<sub>6</sub>F<sub>5</sub>)<sub>4</sub>] from **Table S1**, entry 4 (6 h).

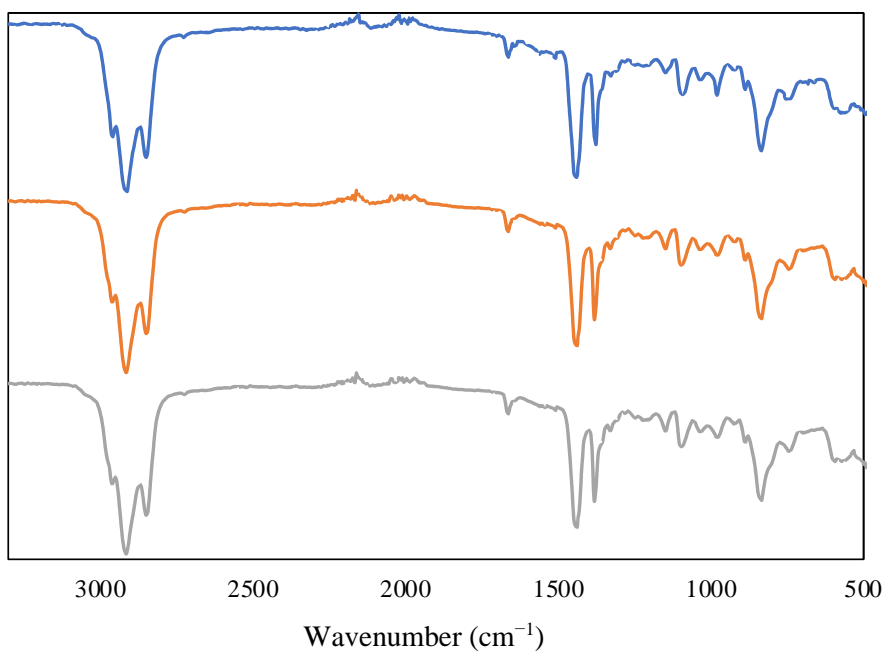

**Fig. S141** FT-IR spectrum of PIP 300 equivalents generated by **6**/[Ph<sub>3</sub>C][B(C<sub>6</sub>F<sub>5</sub>)<sub>4</sub>] from **Table S2**, entry 1 (12 h).

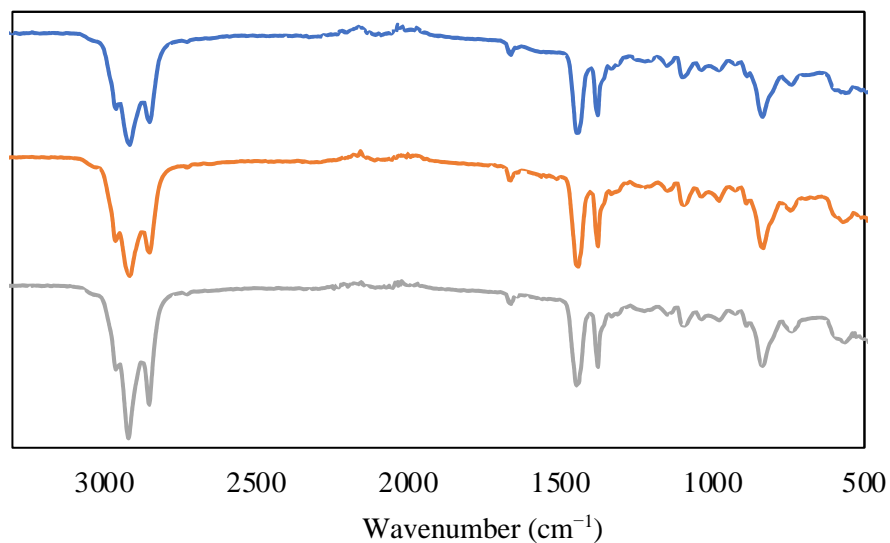

**Fig. S142** FT-IR spectrum of PIP 550 equivalents generated by **6**/[Ph<sub>3</sub>C][B(C<sub>6</sub>F<sub>5</sub>)<sub>4</sub>] from **Table S2**, entry 2 (12 h).

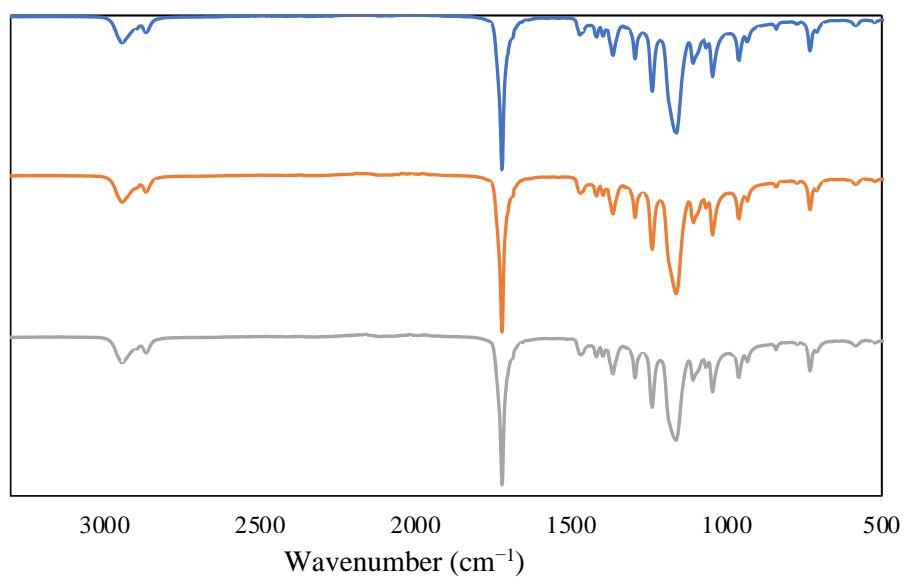

**Fig. S143** FT-IR spectrum of PCL 550 equivalents generated by **6**/[Ph<sub>3</sub>C][B(C<sub>6</sub>F<sub>5</sub>)<sub>4</sub>] from **Table S2**, entry 3 (2 h).

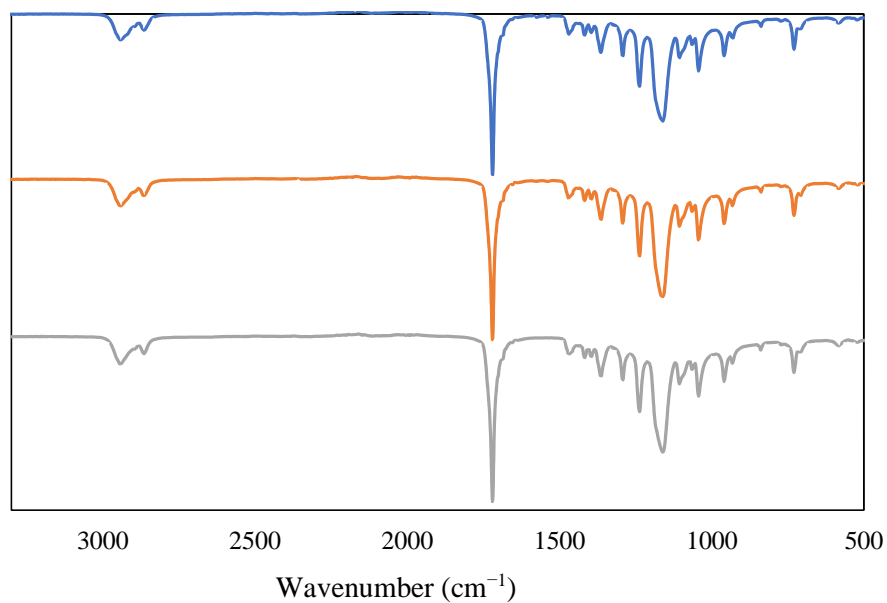

**Fig. S144** FT-IR spectrum of PCL 800 equivalents generated by **6**/[Ph<sub>3</sub>C][B(C<sub>6</sub>F<sub>5</sub>)<sub>4</sub>] from **Table S2**, entry 4 (2 h).

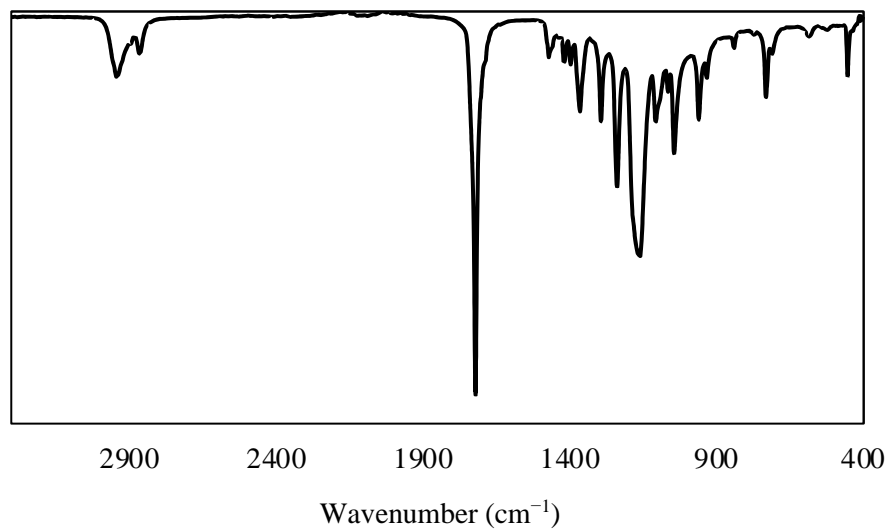

**Fig. S145** FT-IR spectrum of PCL 300 equivalents generated by **6** from **Table S2**, entry 5 (No [Ph<sub>3</sub>C][B(C<sub>6</sub>F<sub>5</sub>)<sub>4</sub>] added) (10 min).

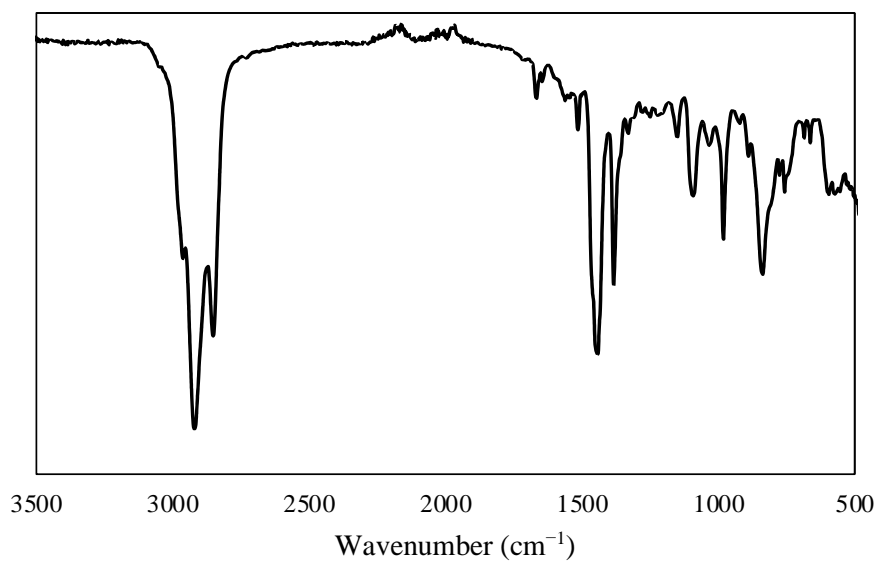

**Fig. S146** FT-IR spectrum of PIP 50 equivalents generated by **6**/[Ph<sub>3</sub>C][B(C<sub>6</sub>F<sub>5</sub>)<sub>4</sub>] from **Table S3**, entry 1 (12 h).

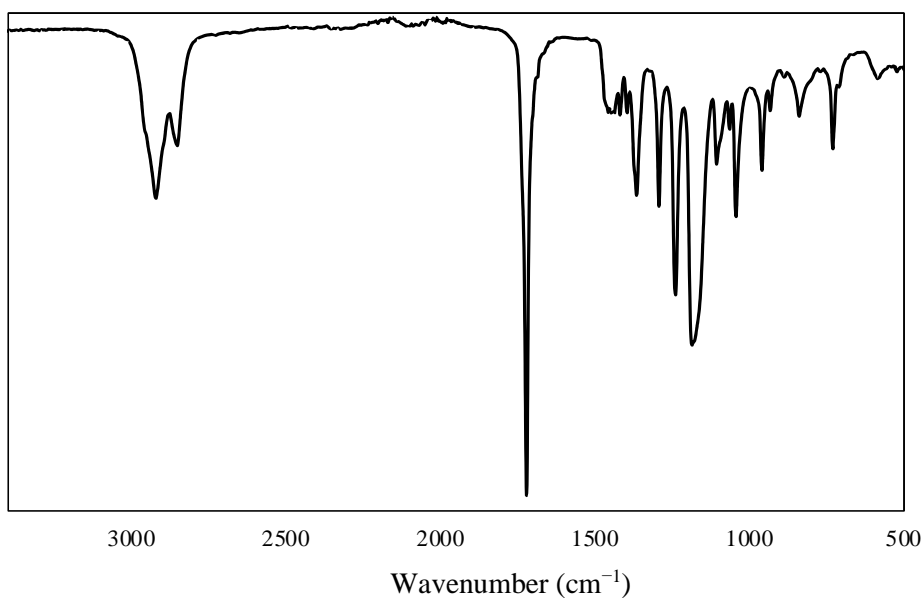

**Fig. S147** FT-IR spectrum of PIP-*b*-PCL 50:50 equivalents generated by **6**/[Ph<sub>3</sub>C][B(C<sub>6</sub>F<sub>5</sub>)<sub>4</sub>] from **Table S3**, entry 2.

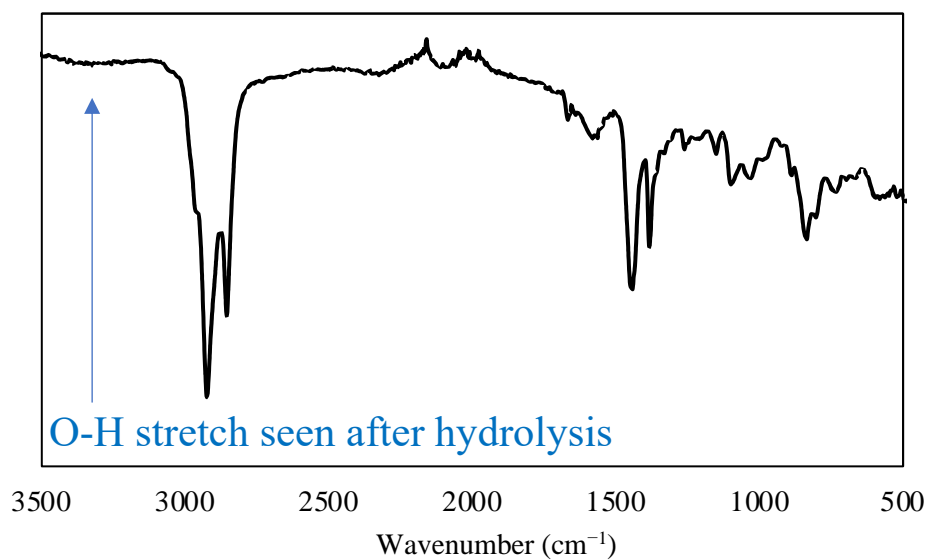

**Fig. S148** FT-IR spectrum of recovered PIP 50 equivalents after hydrolysis of PIP-*b*-PCL 50:50 from **Table S3**, entry 3 (12 h).

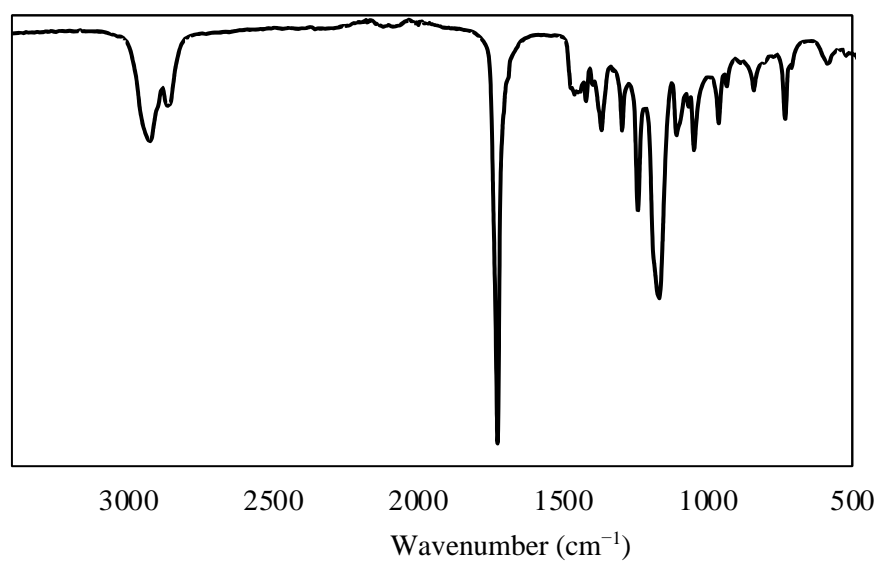

**Fig. S149** FT-IR spectrum of PIP-*b*-PCL 50:50 equivalents generated by  $\text{Y}[\text{N}(\text{SiMe}_3)_2]_3$  from **Table S3**, entry 4 (6 h).

## 5.0 Gel Permeation Chromatography (GPC) Characterization of Isolated Polymers.

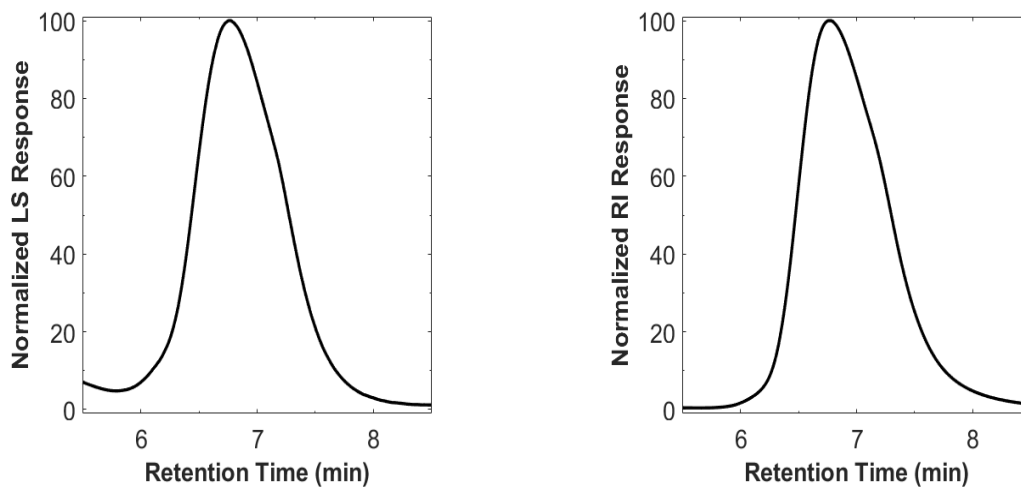

**Fig. S150** GPC spectrum of PIP 800 equivalents generated by **6**/[Ph<sub>3</sub>C][B(C<sub>6</sub>F<sub>5</sub>)<sub>4</sub>] from **Table 1**, entry 1a (12 h): (left) LS; (right) RI.

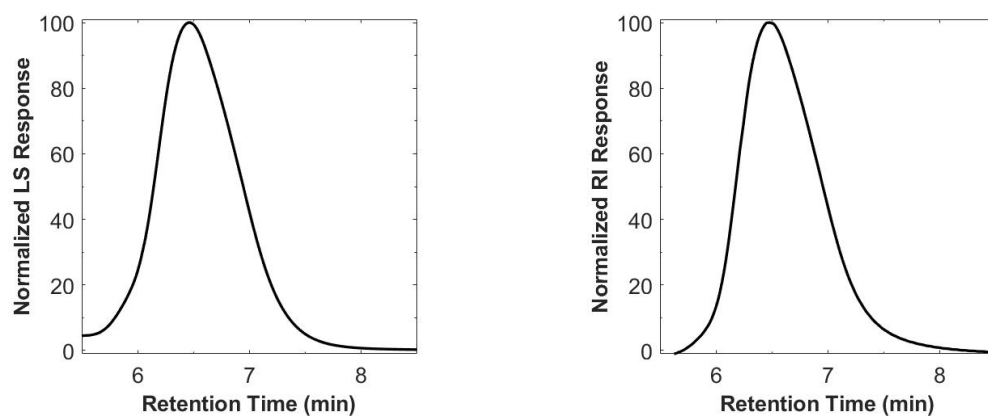

**Fig. S151** GPC spectrum of PIP 800 equivalents generated by **6**/[Ph<sub>3</sub>C][B(C<sub>6</sub>F<sub>5</sub>)<sub>4</sub>] from **Table 1**, entry 1b (12 h): (left) LS; (right) RI.



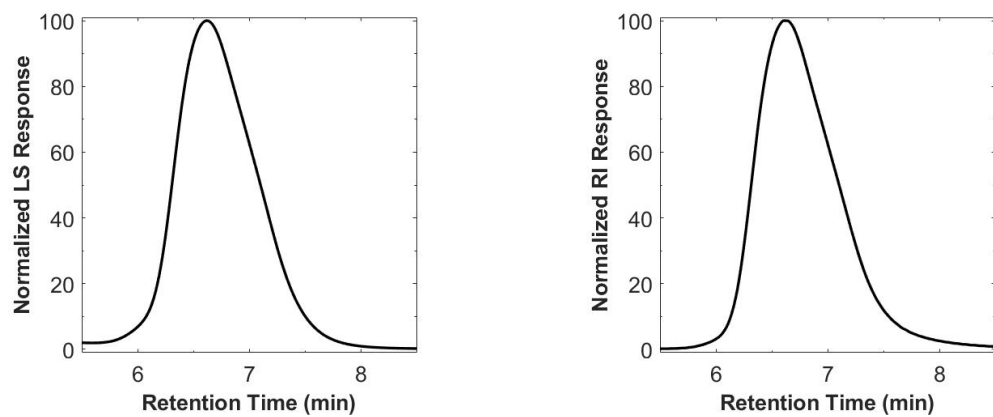

**Fig. S152** GPC spectrum of PIP 800 equivalents generated by **6**/[Ph<sub>3</sub>C][B(C<sub>6</sub>F<sub>5</sub>)<sub>4</sub>] from **Table 1**, entry 1c (12 h): (left) LS; (right) RI.

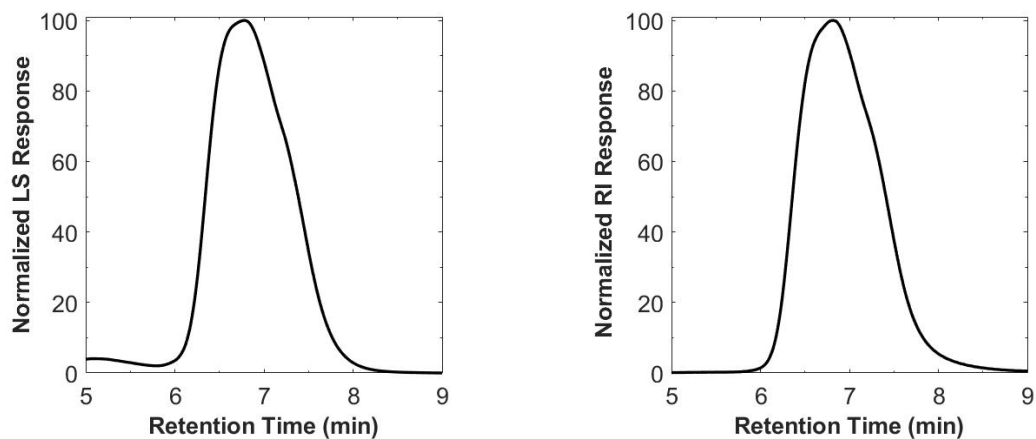

**Fig. S153** GPC spectrum of PIP 800 equivalents generated by **8**/[Ph<sub>3</sub>C][B(C<sub>6</sub>F<sub>5</sub>)<sub>4</sub>] from **Table 1**, entry 3 (12 h): (left) LS; (right) RI.

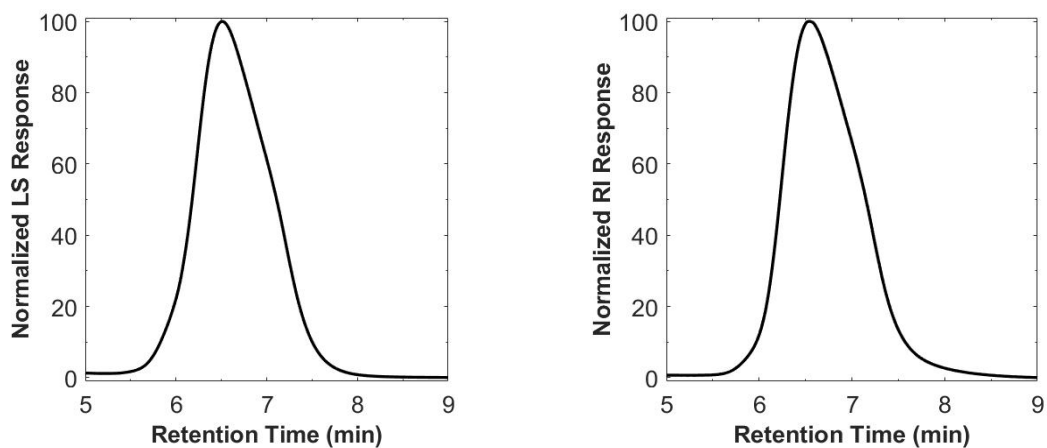

**Fig. S154** GPC spectrum of PIP 800 equivalents generated by **6**/[Ph<sub>3</sub>C][B(C<sub>6</sub>F<sub>5</sub>)<sub>4</sub>] from **Table 1**, entry 4a (24 h): (left) LS; (right) RI.

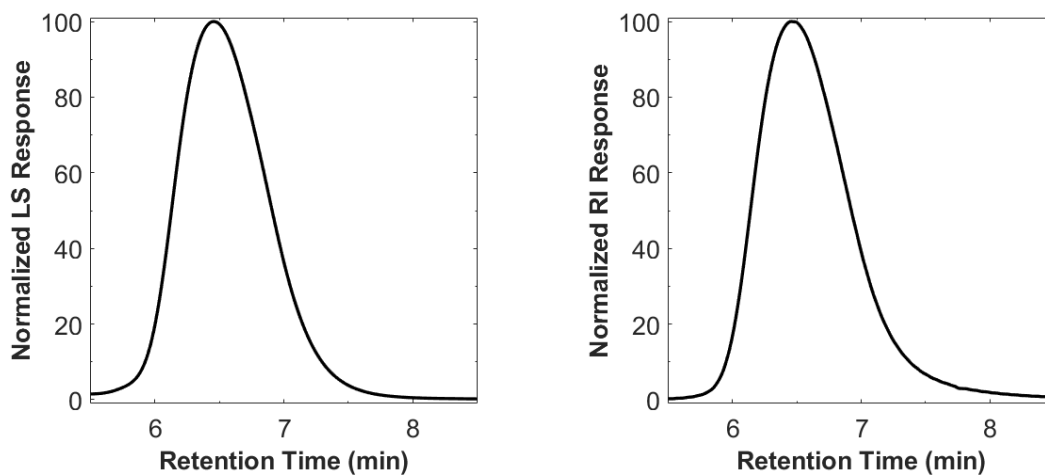

**Fig. S155** GPC spectrum of PIP 800 equivalents generated by **6**/[Ph<sub>3</sub>C][B(C<sub>6</sub>F<sub>5</sub>)<sub>4</sub>] from **Table 1**, entry 4b (24 h): (left) LS; (right) RI.

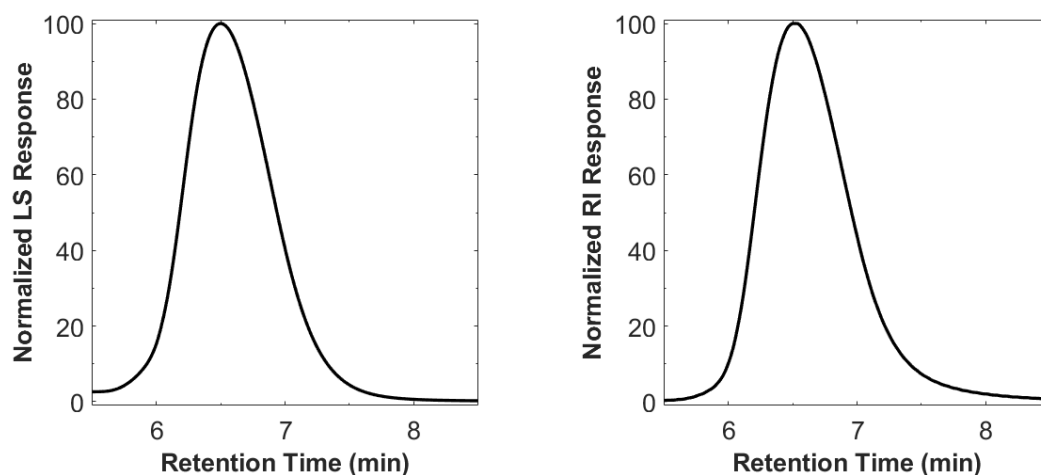

**Fig. S156** GPC spectrum of PIP 800 equivalents generated by **6**/[Ph<sub>3</sub>C][B(C<sub>6</sub>F<sub>5</sub>)<sub>4</sub>] from **Table 1**, entry 4c (24 h): (left) LS; (right) RI.

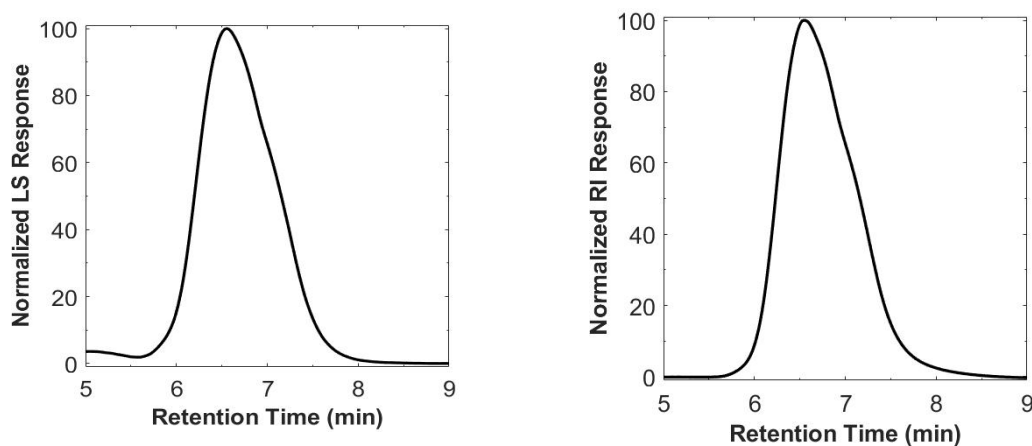

**Fig. S157** GPC spectrum of PIP 800 equivalents generated by **6**/[Ph<sub>3</sub>C][B(C<sub>6</sub>F<sub>5</sub>)<sub>4</sub>] from **Table 1**, entry 5 (30 min): (left) LS; (right) RI.

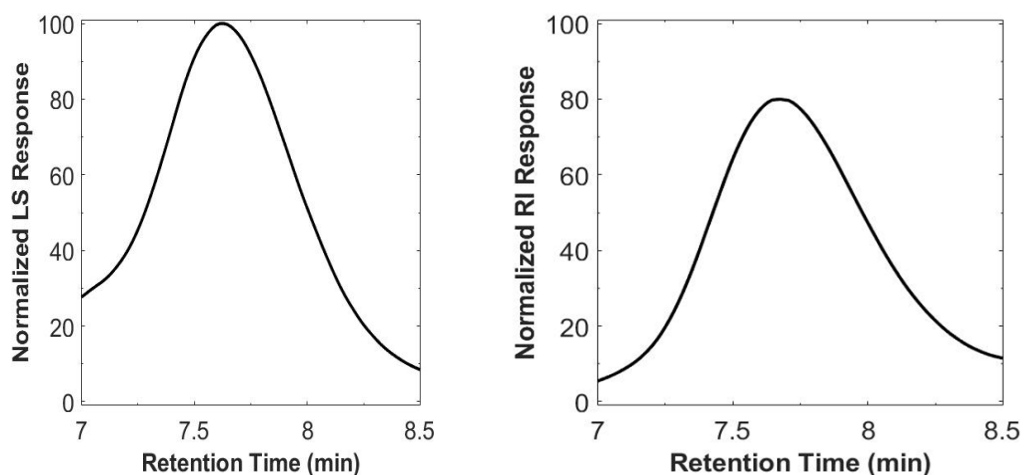

**Fig. S158** GPC spectrum of PIP 800 equivalents generated by **8**/[Ph<sub>3</sub>C][B(C<sub>6</sub>F<sub>5</sub>)<sub>4</sub>] from **Table 1**, entry 6 (30 min): (left) LS; (right) RI.

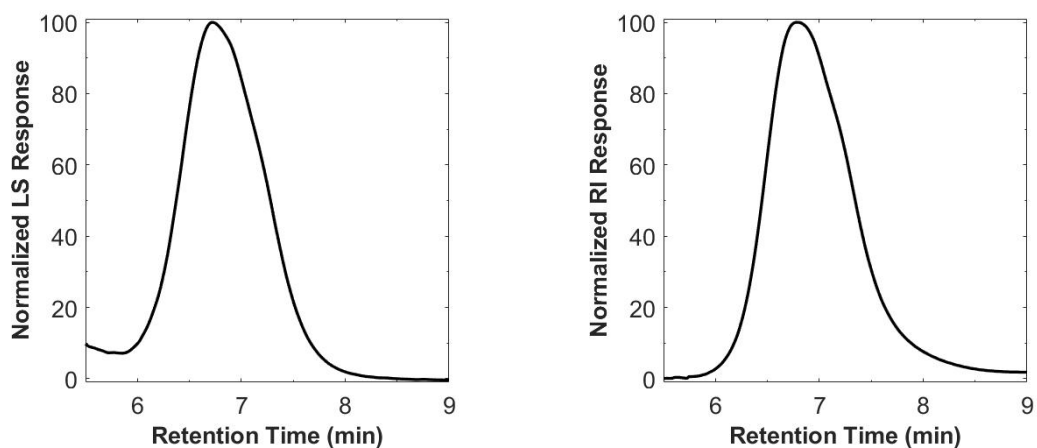

**Fig. S159** GPC spectrum of PCL 300 equivalents generated by **6**/[Ph<sub>3</sub>C][B(C<sub>6</sub>F<sub>5</sub>)<sub>4</sub>] from **Table 1**, entry 7 (10 min): (left) LS; (right) RI.

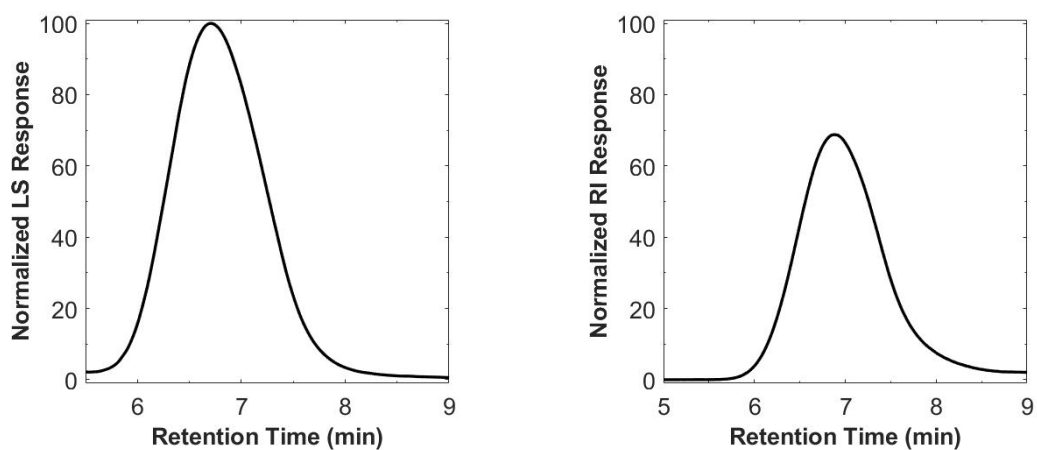

**Fig. S160** GPC spectrum of PCL 300 equivalents generated by **8**/[Ph<sub>3</sub>C][B(C<sub>6</sub>F<sub>5</sub>)<sub>4</sub>] from **Table 1**, entry 8 (10 min): (left) LS; (right) RI.

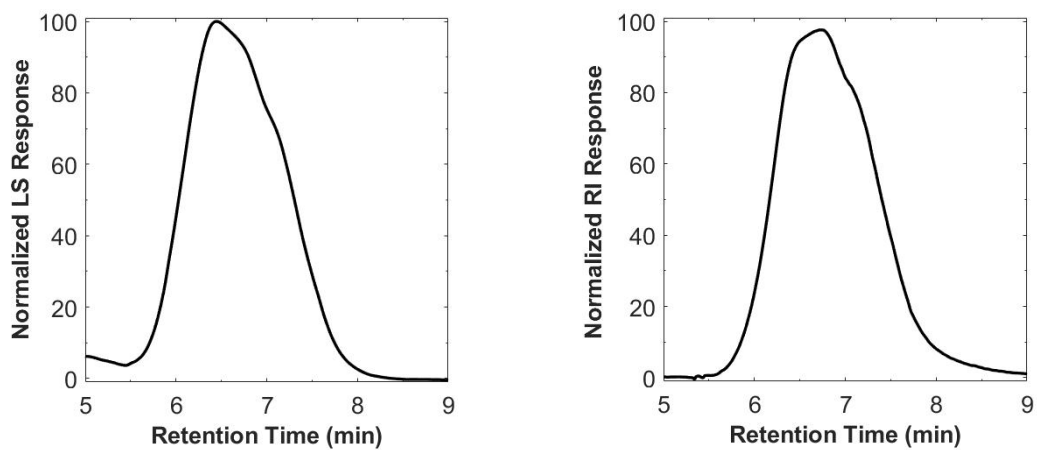

**Fig. S161** GPC spectrum of PCL 300 equivalents generated by **6**/[Ph<sub>3</sub>C][B(C<sub>6</sub>F<sub>5</sub>)<sub>4</sub>] from **Table 1**, entry 9a (2 h): (left) LS; (right) RI.

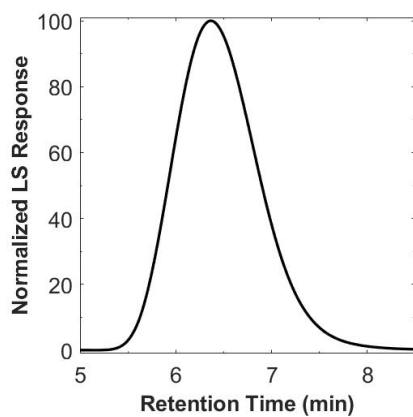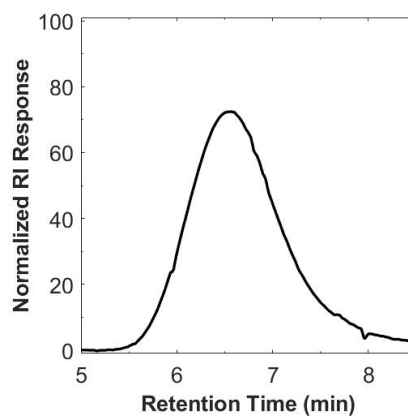

**Fig. S162** GPC spectrum of PCL 300 equivalents generated by **6**/[Ph<sub>3</sub>C][B(C<sub>6</sub>F<sub>5</sub>)<sub>4</sub>] from **Table 1**, entry 9b (2 h): (left) LS; (right) RI.

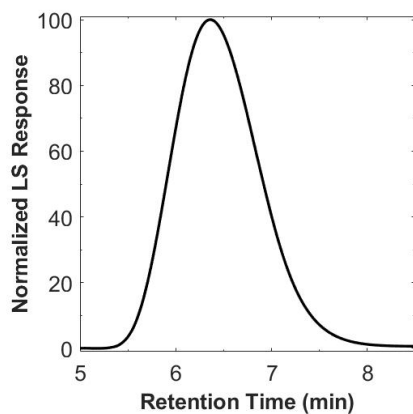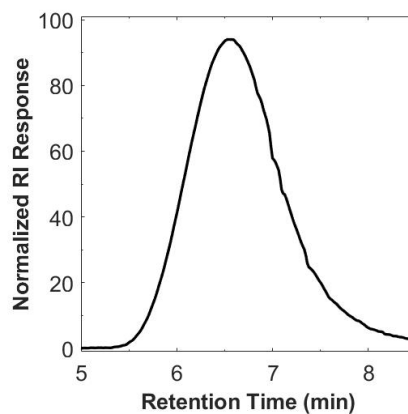

**Fig. S163** GPC spectrum of PCL 300 equivalents generated by **6**/[Ph<sub>3</sub>C][B(C<sub>6</sub>F<sub>5</sub>)<sub>4</sub>] from **Table 1**, entry 9c (2 h): (left) LS; (right) RI.

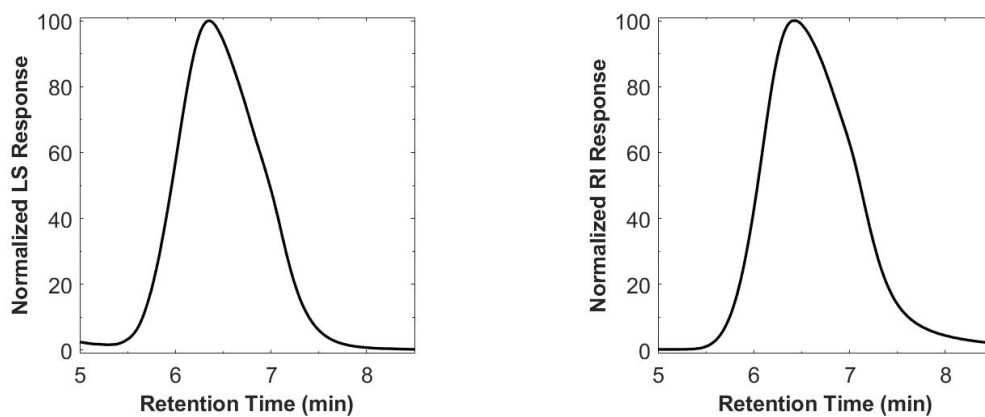

**Fig. S164** GPC spectrum of PIP-*b*-PCL 800:300 equivalents generated by **6**/[Ph<sub>3</sub>C][B(C<sub>6</sub>F<sub>5</sub>)<sub>4</sub>] from Table 2, entry 1a: (left) LS; (right) RI.

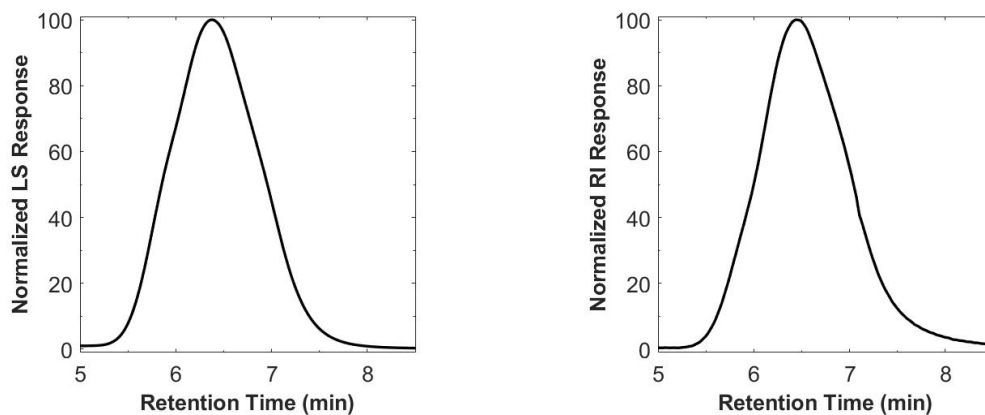

**Fig. S165** GPC spectrum of PIP-*b*-PCL 800:300 equivalents generated by **6**/[Ph<sub>3</sub>C][B(C<sub>6</sub>F<sub>5</sub>)<sub>4</sub>] from Table 2, entry 1b: (left) LS; (right) RI.

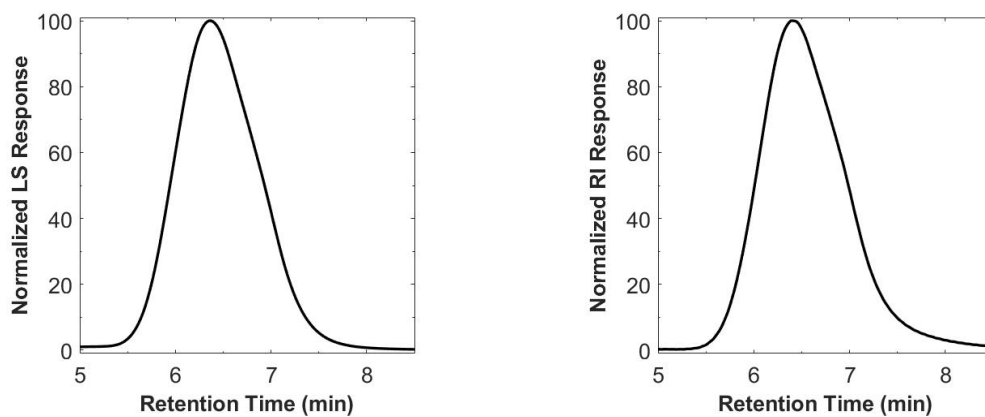

**Fig. S166** GPC spectrum of PIP-*b*-PCL 800:300 equivalents generated by **6**/[Ph<sub>3</sub>C][B(C<sub>6</sub>F<sub>5</sub>)<sub>4</sub>] from Table 2, entry 1c: (left) LS; (right) RI.

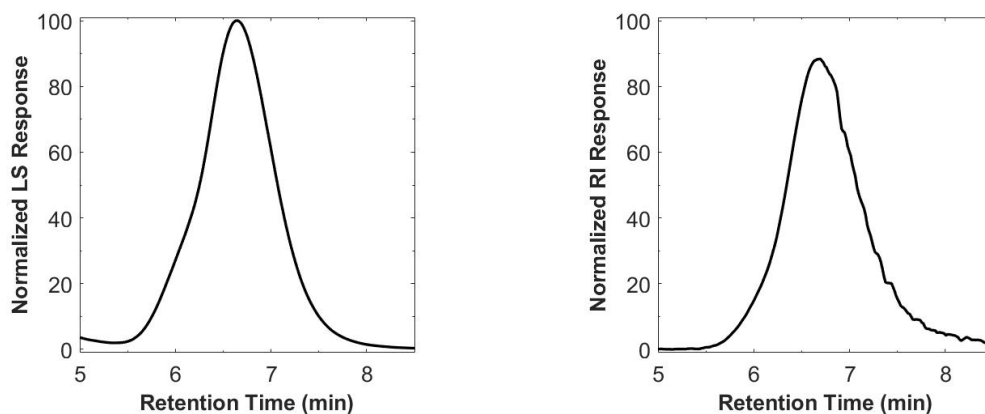

**Fig. S167** GPC spectrum of PIP-*b*-PCL 550:550 equivalents generated by **6**/[Ph<sub>3</sub>C][B(C<sub>6</sub>F<sub>5</sub>)<sub>4</sub>] from Table 2, entry 2a: (left) LS; (right) RI.

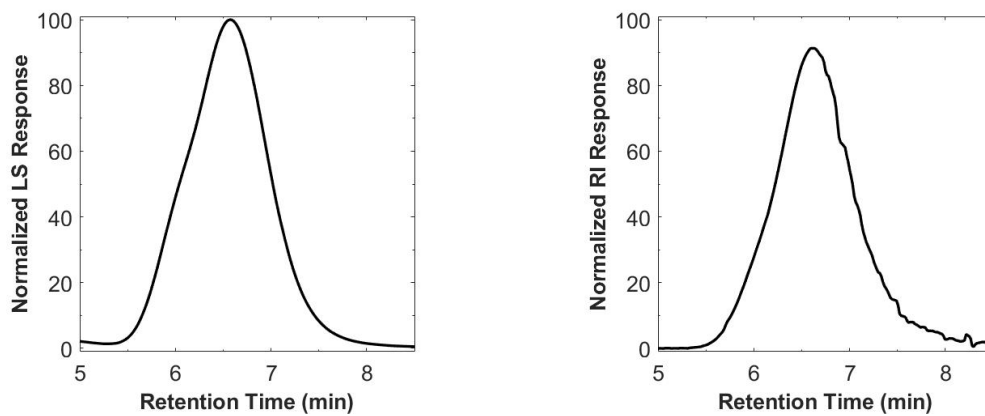

**Fig. S168** GPC spectrum of PIP-*b*-PCL 550:550 equivalents generated by **6**/[Ph<sub>3</sub>C][B(C<sub>6</sub>F<sub>5</sub>)<sub>4</sub>] from Table 2, entry 2b: (left) LS; (right) RI.



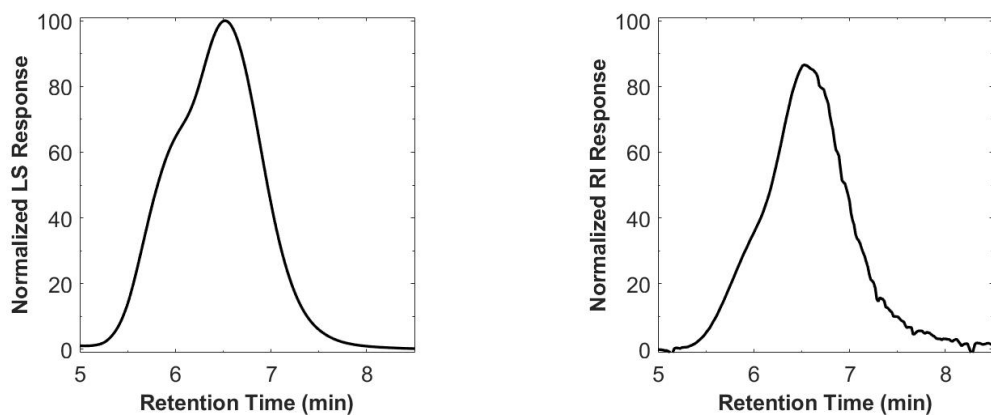

**Fig. S169** GPC spectrum of PIP-*b*-PCL 550:550 equivalents generated by **6**/[Ph<sub>3</sub>C][B(C<sub>6</sub>F<sub>5</sub>)<sub>4</sub>] from Table 2, entry 2c: (left) LS; (right) RI.

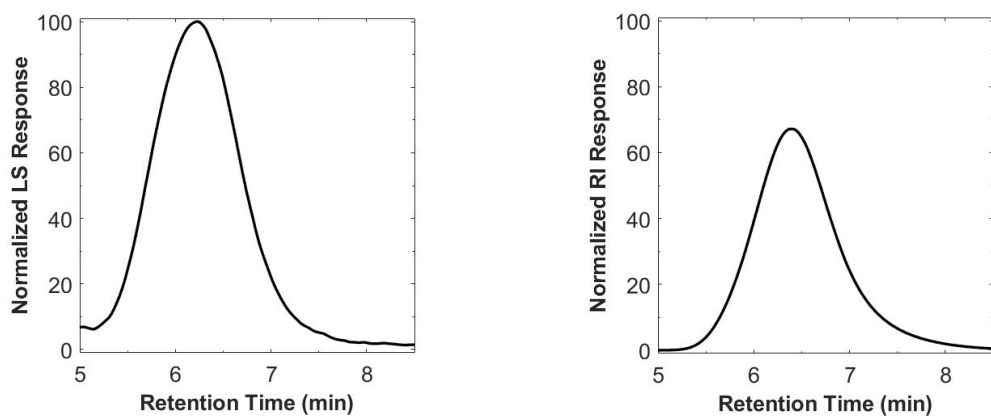

**Fig. S170** GPC spectrum of PIP-*b*-PCL 300:800 equivalents generated by **6**/[Ph<sub>3</sub>C][B(C<sub>6</sub>F<sub>5</sub>)<sub>4</sub>] from Table 2, entry 3a: (left) LS; (right) RI.

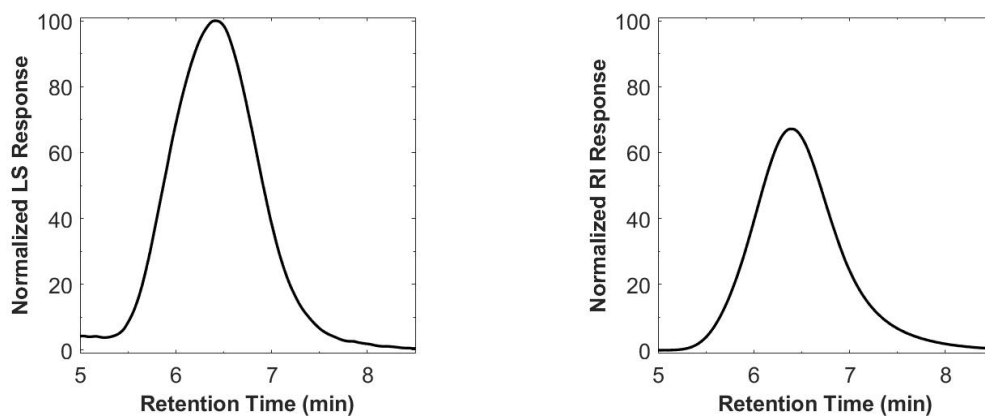

**Fig. S171** GPC spectrum of PIP-*b*-PCL 300:800 equivalents generated by **6**/[Ph<sub>3</sub>C][B(C<sub>6</sub>F<sub>5</sub>)<sub>4</sub>] from **Table 2**, entry 3b: (left) LS; (right) RI.

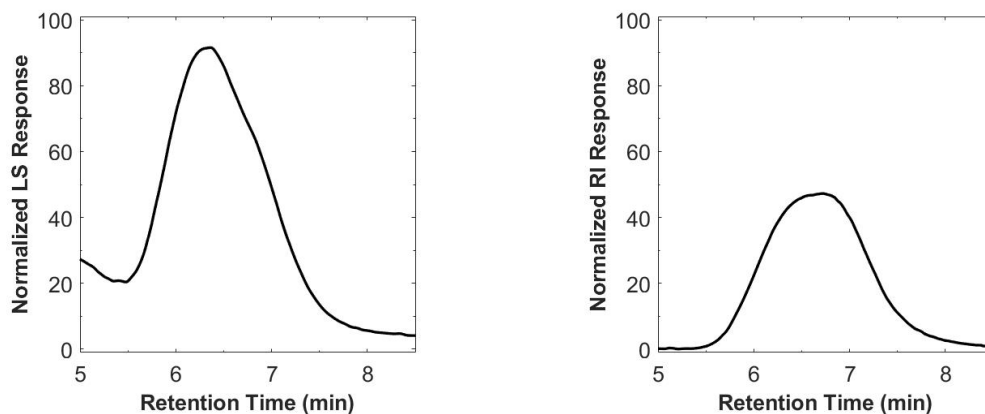

**Fig. S172** GPC spectrum of PIP-*b*-PCL 300:800 equivalents generated by **6**/[Ph<sub>3</sub>C][B(C<sub>6</sub>F<sub>5</sub>)<sub>4</sub>] from **Table 2**, entry 3c: (left) LS; (right) RI.

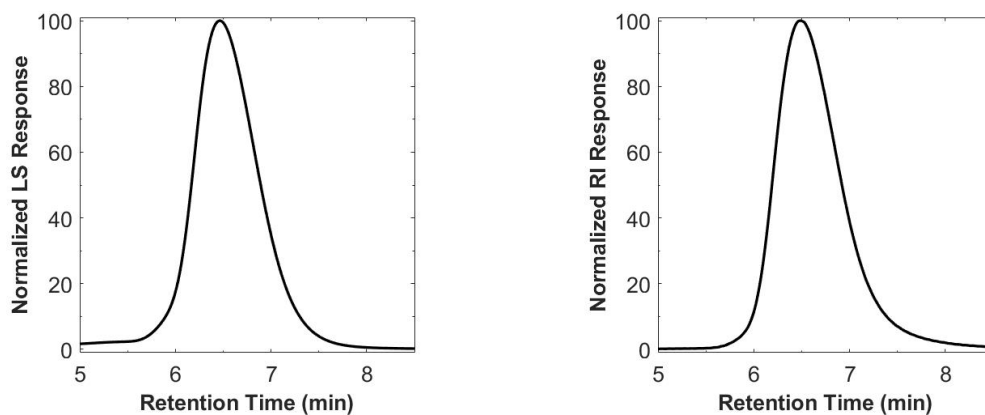

**Fig. S173** GPC spectrum of PIP 800 equivalents generated by **6**/[Ph<sub>3</sub>C][B(C<sub>6</sub>F<sub>5</sub>)<sub>4</sub>] from **Table 3**, entry 1a (IP addition time 0 min): (left) LS; (right) RI.

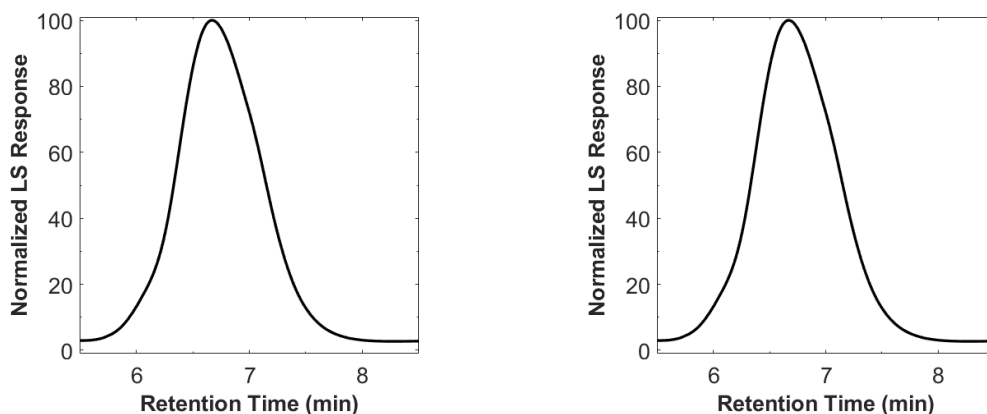

**Fig. S174** GPC spectrum of PIP 800 equivalents generated by **6**/[Ph<sub>3</sub>C][B(C<sub>6</sub>F<sub>5</sub>)<sub>4</sub>] from **Table 3**, entry 1b (IP addition time 0 min): (left) LS; (right) RI.

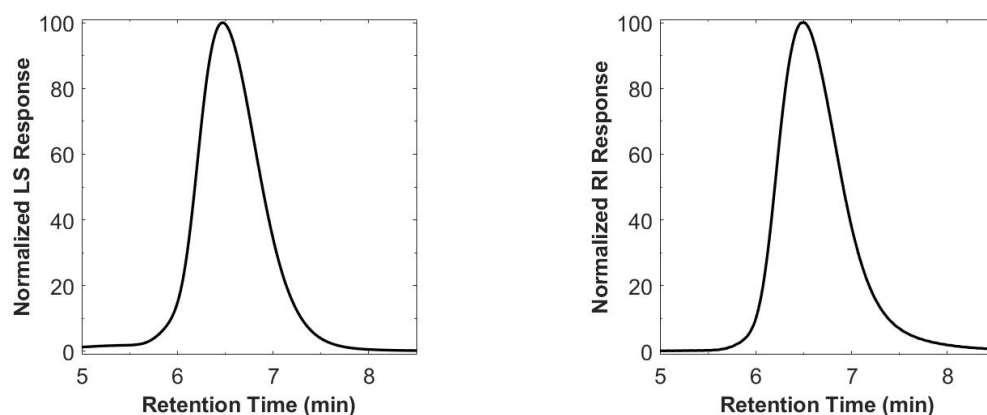

**Fig. S175** GPC spectrum of PIP 800 equivalents generated by **6**/[Ph<sub>3</sub>C][B(C<sub>6</sub>F<sub>5</sub>)<sub>4</sub>] from **Table 3**, entry 1c (IP addition time 0 min): (left) LS; (right) RI.

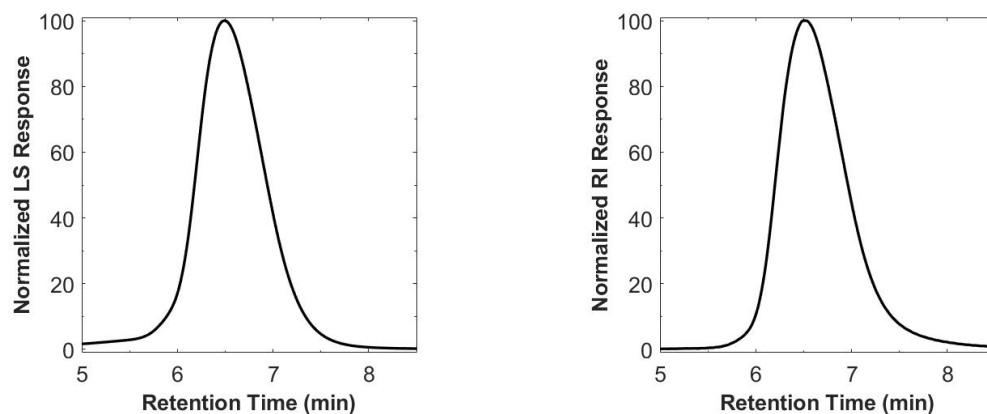

**Fig. S176** GPC spectrum of PIP 800 equivalents generated by **6**/[Ph<sub>3</sub>C][B(C<sub>6</sub>F<sub>5</sub>)<sub>4</sub>] from **Table 3**, entry 2a (IP addition time 30 min): (left) LS; (right) RI.

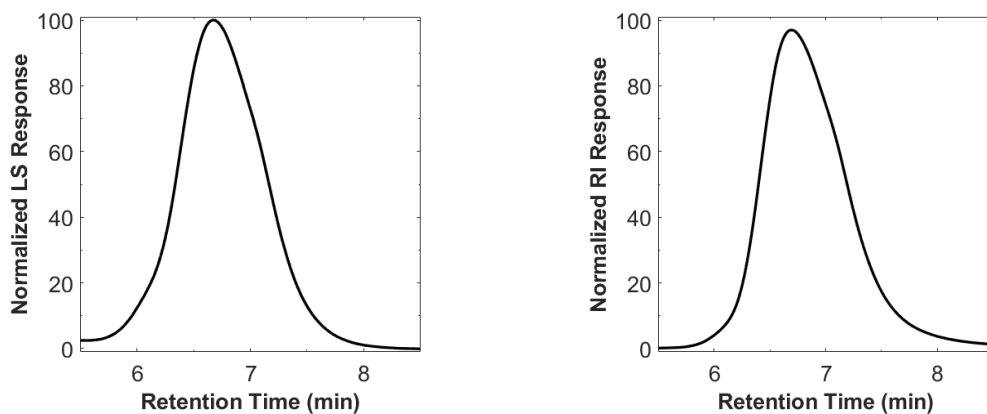

**Fig. S177** GPC spectrum of PIP 800 equivalents generated by **6**/[Ph<sub>3</sub>C][B(C<sub>6</sub>F<sub>5</sub>)<sub>4</sub>] from **Table 3**, entry 2b (IP addition time 30 min): (left) LS; (right) RI.

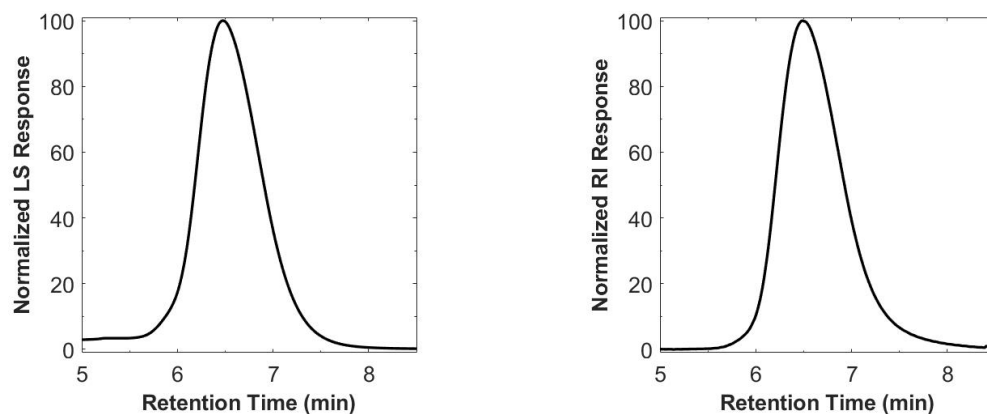

**Fig. S178** GPC spectrum of PIP 800 equivalents generated by **6**/[Ph<sub>3</sub>C][B(C<sub>6</sub>F<sub>5</sub>)<sub>4</sub>] from **Table 3**, entry 2c (IP addition time 30 min): (left) LS; (right) RI.

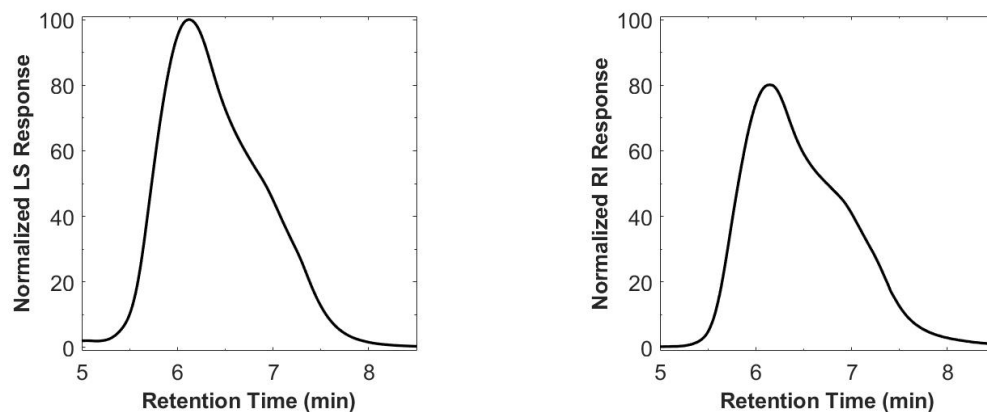

**Fig. S179** GPC spectrum of PIP-*b*-PCL 800:300 generated by **6** and 0.5 equivalents of [Ph<sub>3</sub>C][B(C<sub>6</sub>F<sub>5</sub>)<sub>4</sub>] from **Table 3**, entry 3a: (left) LS; (right) RI.

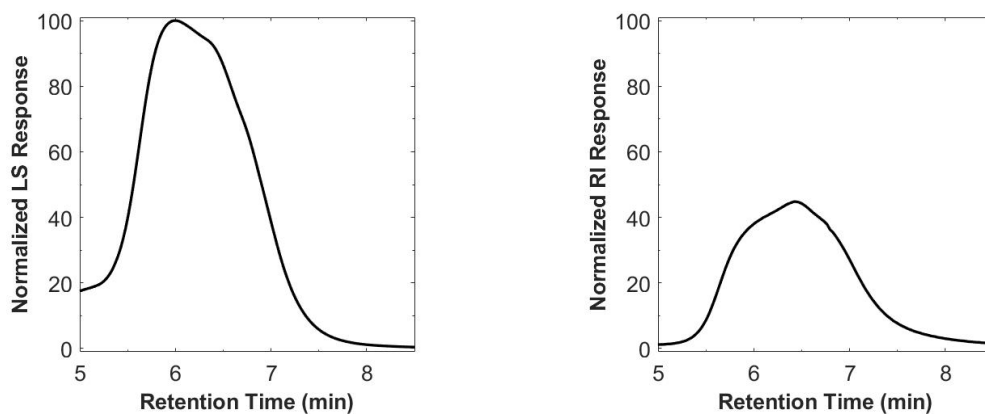

**Fig. S180** GPC spectrum of PIP-*b*-PCL 800:300 generated by **6** and 0.5 equivalents of  $[\text{Ph}_3\text{C}][\text{B}(\text{C}_6\text{F}_5)_4]$  from **Table 3**, entry 3b: (left) LS; (right) RI.

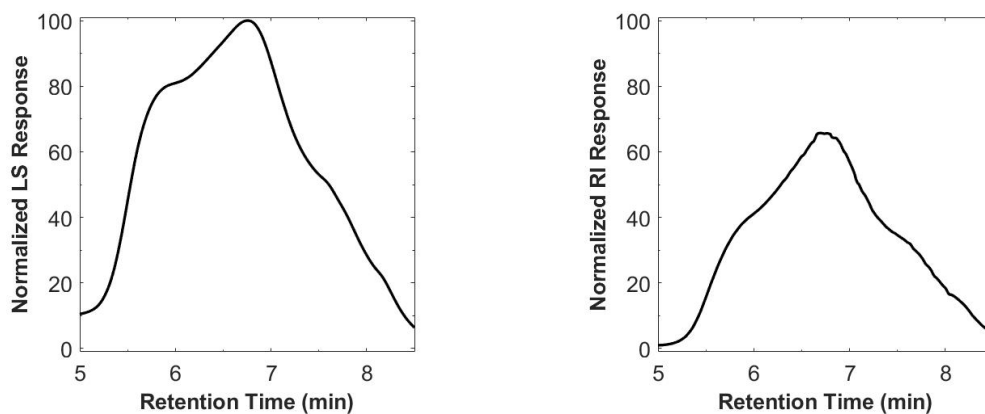

**Fig. S181** GPC spectrum of PIP-*b*-PCL 800:300 generated by **6** and 0.5 equivalents of  $[\text{Ph}_3\text{C}][\text{B}(\text{C}_6\text{F}_5)_4]$  from **Table 3**, entry 3c: (left) LS; (right) RI.

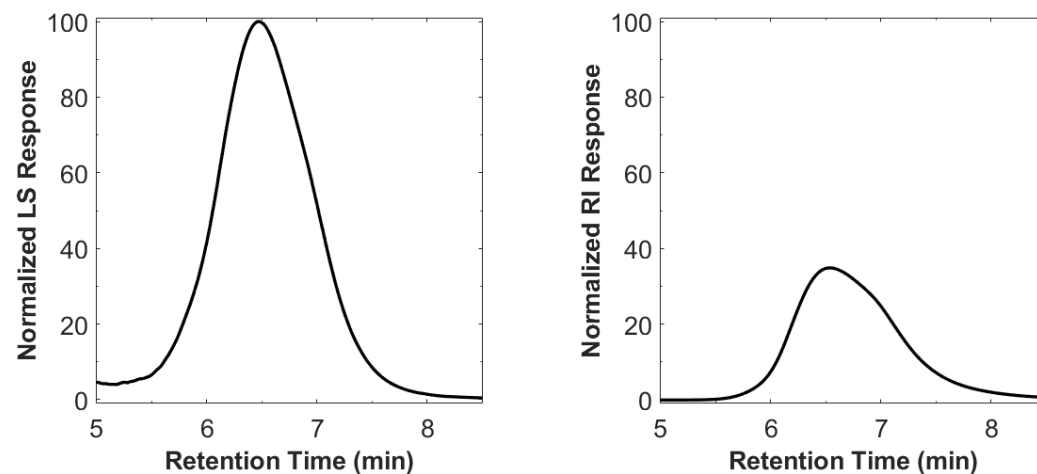

**Fig. S182** GPC spectrum of PIP-*b*-PCL 800:300 generated by **6** and 1.5 equivalents of  $[\text{Ph}_3\text{C}][\text{B}(\text{C}_6\text{F}_5)_4]$  from **Table 3**, entry 4a: (left) LS; (right) RI.

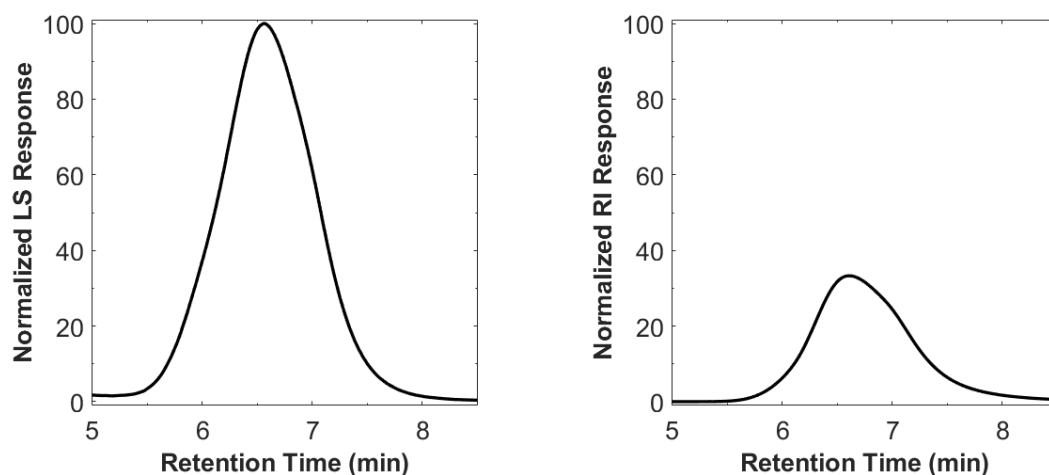

**Fig. S183** GPC spectrum of PIP-*b*-PCL 800:300 generated by **6** and 1.5 equivalents of  $[\text{Ph}_3\text{C}][\text{B}(\text{C}_6\text{F}_5)_4]$  from **Table 3**, entry 4b: (left) LS; (right) RI.

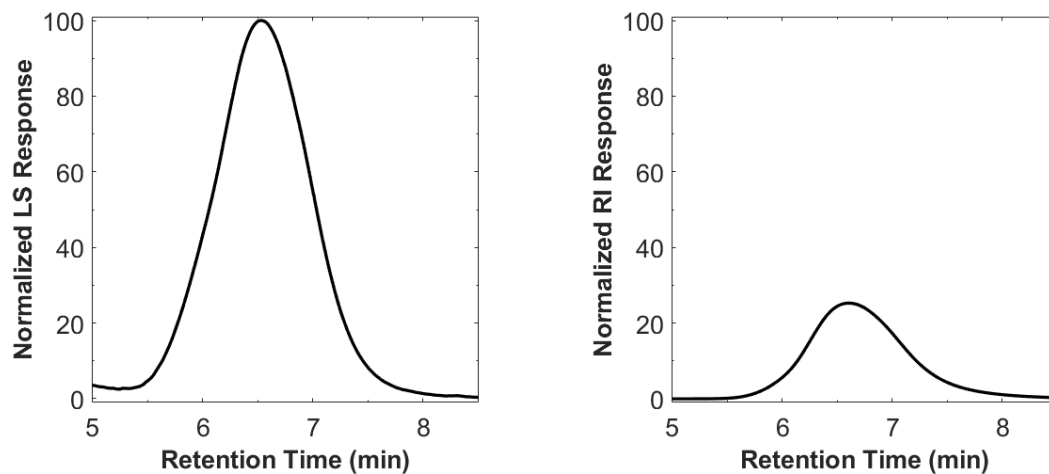

**Fig. S184** GPC spectrum of PIP-*b*-PCL 800:300 generated by **6** and 1.5 equivalents of  $[\text{Ph}_3\text{C}][\text{B}(\text{C}_6\text{F}_5)_4]$  from **Table 3**, entry 4c: (left) LS; (right) RI.

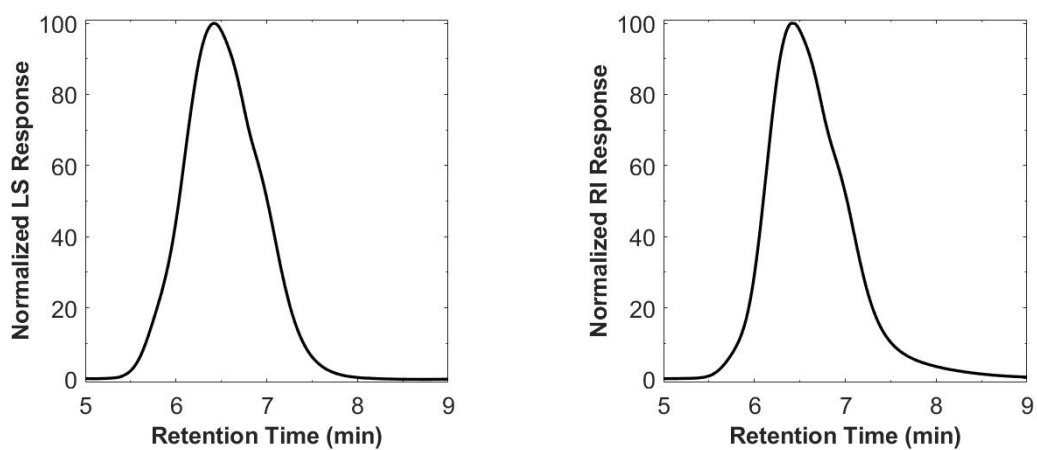

**Fig. S185** GPC spectrum of PMyr generated by **6**/[Ph<sub>3</sub>C][B(C<sub>6</sub>F<sub>5</sub>)<sub>4</sub>] from **Table 4**, entry 1 (30 min): (left) LS; (right) RI.

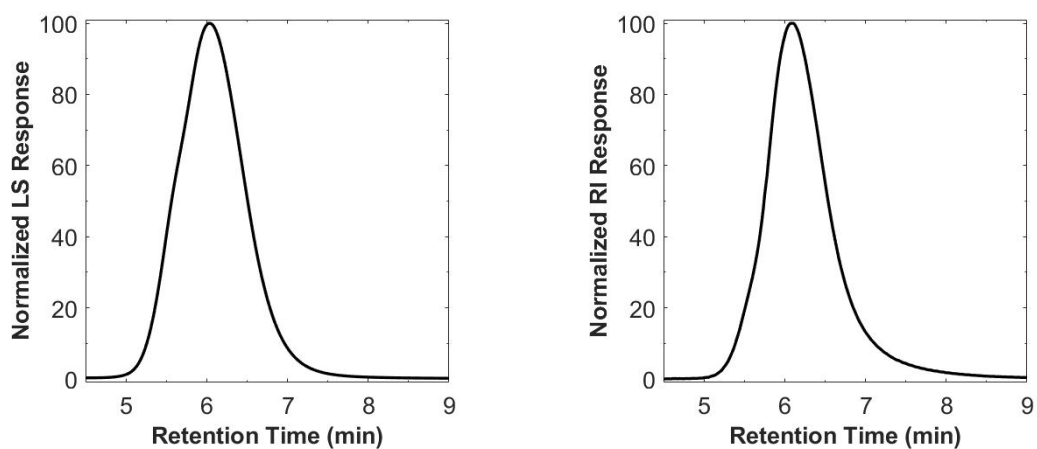

**Fig. S186** GPC spectrum of PMyr generated by **6**/[Ph<sub>3</sub>C][B(C<sub>6</sub>F<sub>5</sub>)<sub>4</sub>] from **Table 4**, entry 2 (90 min): (left) LS; (right) RI.

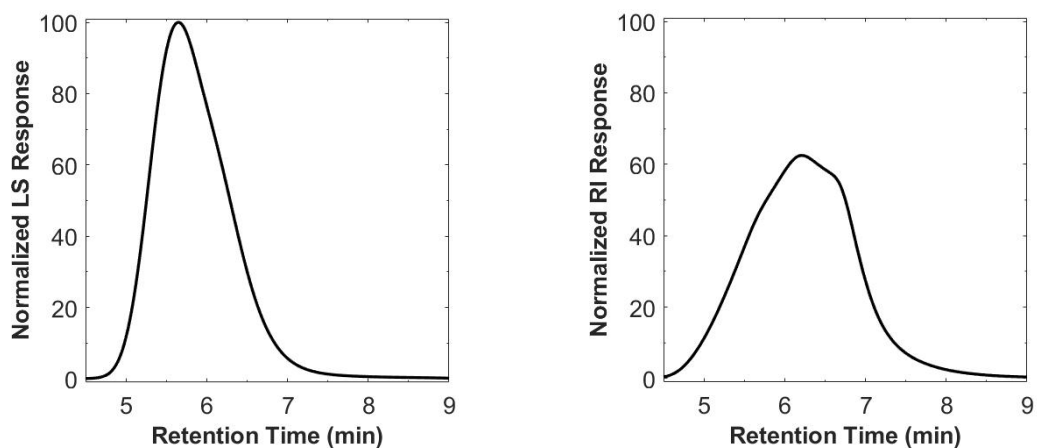

**Fig. S187** GPC spectrum of PMyr generated by **6**/[Ph<sub>3</sub>C][B(C<sub>6</sub>F<sub>5</sub>)<sub>4</sub>] from **Table 4**, entry 3 (3 h): (left) LS; (right) RI.

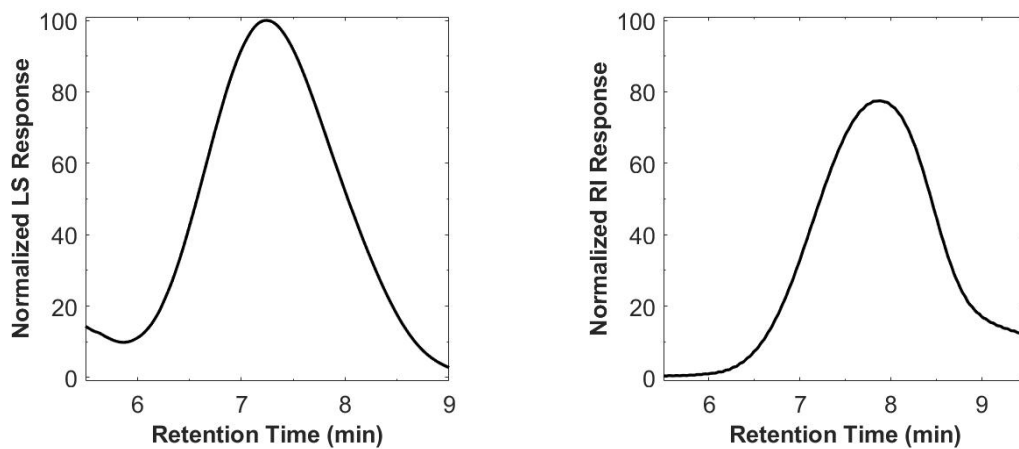

**Fig. S188** GPC spectrum of PS generated by **6**/[Ph<sub>3</sub>C][B(C<sub>6</sub>F<sub>5</sub>)<sub>4</sub>] from **Table 4**, entry 4 (30 min): (left) LS; (right) RI.



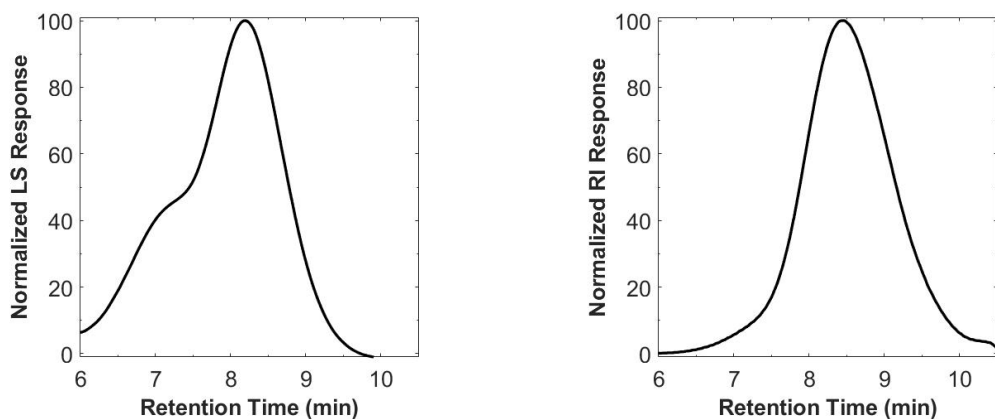

**Fig. S189** GPC spectrum of PS generated by **6**/[Ph<sub>3</sub>C][B(C<sub>6</sub>F<sub>5</sub>)<sub>4</sub>] from **Table 4**, entry 5 (20 h): (left) LS; (right) RI.

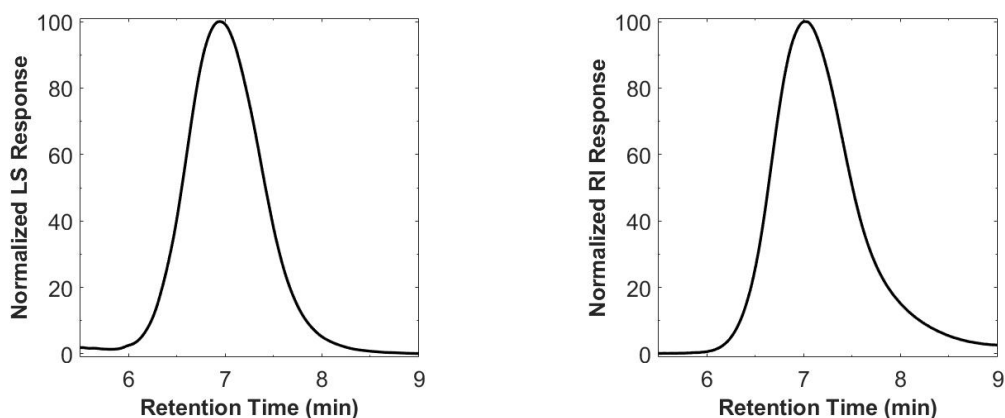

**Fig. S190** GPC spectrum of PVL generated by **6**/[Ph<sub>3</sub>C][B(C<sub>6</sub>F<sub>5</sub>)<sub>4</sub>] from **Table 4**, entry 6 (10 min): (left) LS; (right) RI.

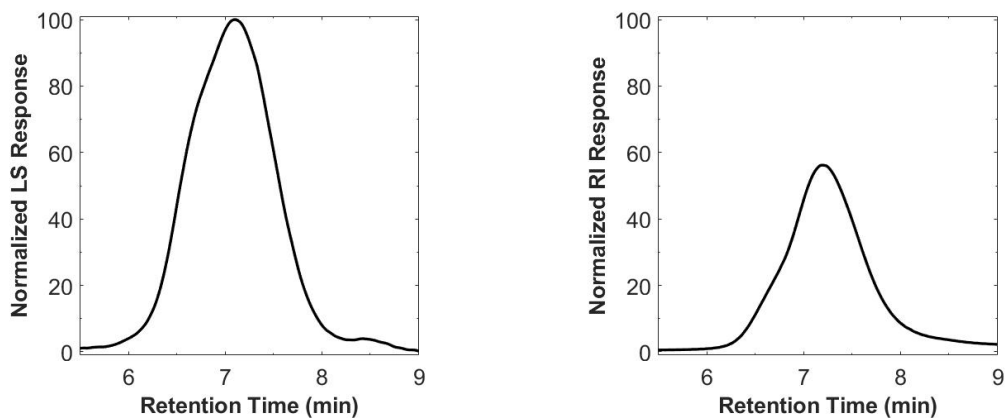

**Fig. S191** GPC spectrum of PDL generated by **6**/[Ph<sub>3</sub>C][B(C<sub>6</sub>F<sub>5</sub>)<sub>4</sub>] from **Table 4**, entry 7 (6 h): (left) LS; (right) RI.

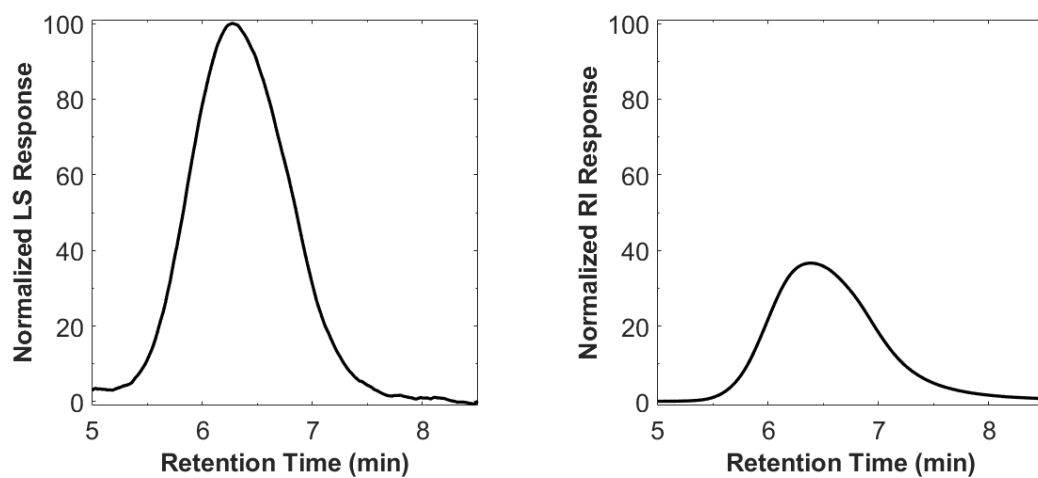

**Fig. S192** GPC spectrum of PIP-*b*-PVL 800:300 equivalents generated by **6**/[Ph<sub>3</sub>C][B(C<sub>6</sub>F<sub>5</sub>)<sub>4</sub>] from Table 5, entry 1: (left) LS; (right) RI.

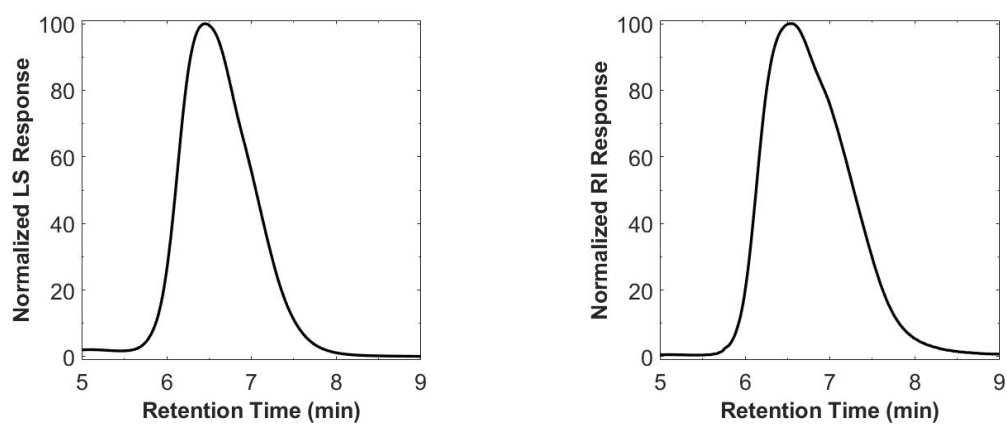

**Fig. S193** GPC spectrum of PIP-*b*-PDL 800:300 equivalents generated by **6**/[Ph<sub>3</sub>C][B(C<sub>6</sub>F<sub>5</sub>)<sub>4</sub>] from Table 5, entry 2: (left) LS; (right) RI.

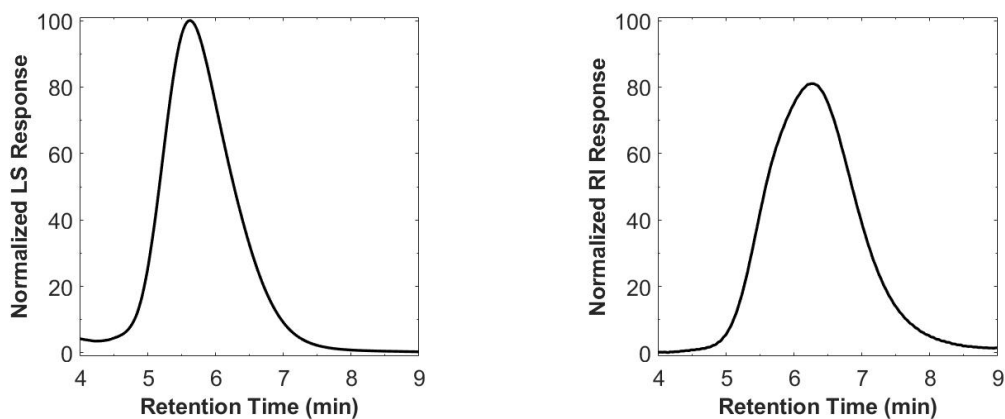

**Fig. S194** GPC spectrum of PMyr-*b*-PCL 800:300 equivalents generated by **6**/[Ph<sub>3</sub>C][B(C<sub>6</sub>F<sub>5</sub>)<sub>4</sub>] from Table 5, entry 3: (left) LS; (right) RI.

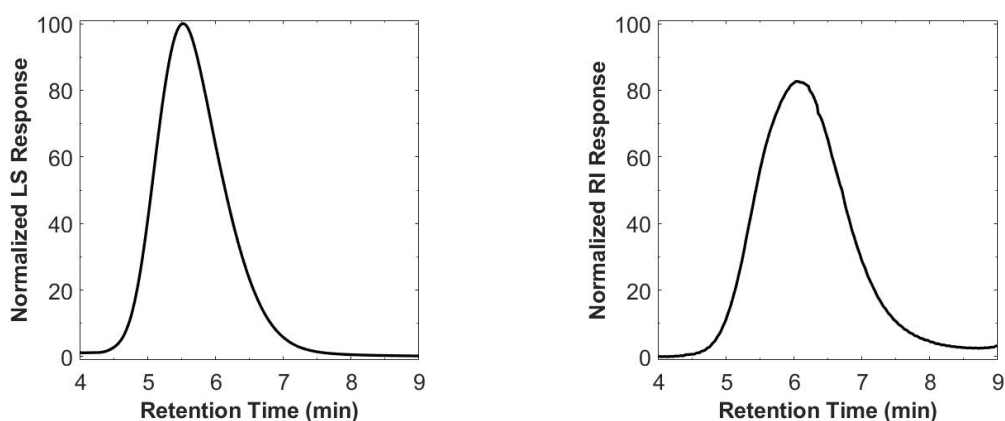

**Fig. S195** GPC spectrum of PMyr-*b*-PVL 800:300 equivalents generated by **6**/[Ph<sub>3</sub>C][B(C<sub>6</sub>F<sub>5</sub>)<sub>4</sub>] from Table 5, entry 4: (left) LS; (right) RI.

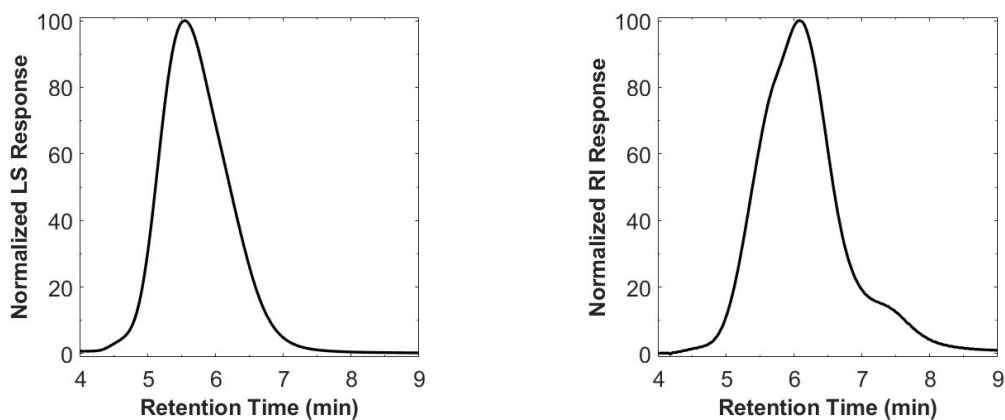

**Fig. S196** GPC spectrum of PMyr-*b*-PDL 800:300 equivalents generated by **6**/[Ph<sub>3</sub>C][B(C<sub>6</sub>F<sub>5</sub>)<sub>4</sub>] from Table 5, entry 5: (left) LS; (right) RI.

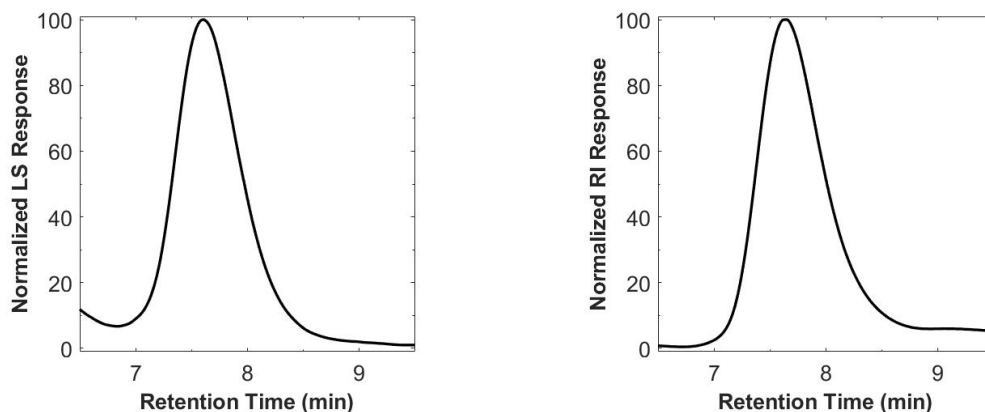

**Fig. S197** GPC spectrum of PMyr 800 equivalents generated by **8**/[Ph<sub>3</sub>C][B(C<sub>6</sub>F<sub>5</sub>)<sub>4</sub>] from **Table S1**, entry 1 (30min): (left) LS; (right) RI.

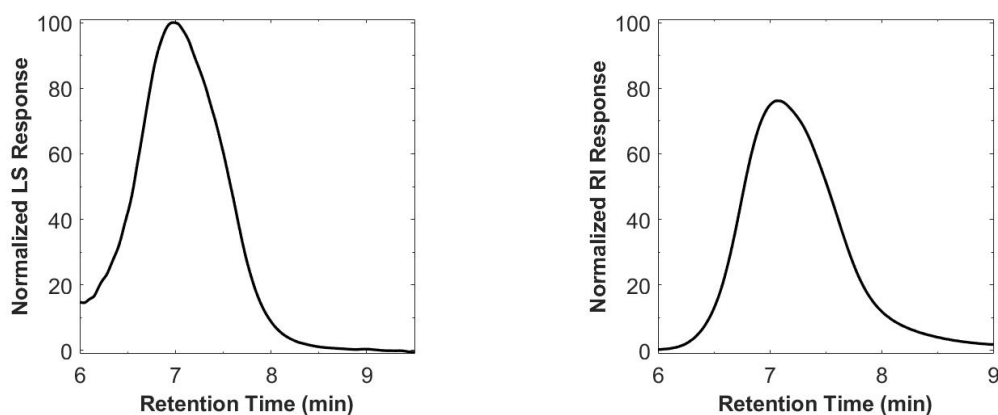

**Fig. S198** GPC spectrum of PS 800 equivalents generated by **8**/[Ph<sub>3</sub>C][B(C<sub>6</sub>F<sub>5</sub>)<sub>4</sub>] from **Table S1**, entry 2 (30 min): (left) LS; (right) RI.

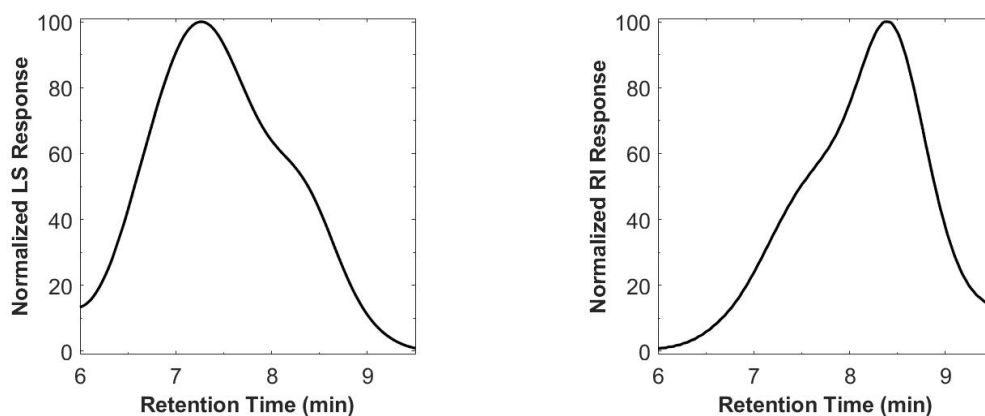

**Fig. S199** GPC spectrum of PVL 300 equivalents generated by **8**/[Ph<sub>3</sub>C][B(C<sub>6</sub>F<sub>5</sub>)<sub>4</sub>] from **Table S1**, entry 3 (10 min): (left) LS; (right) RI.

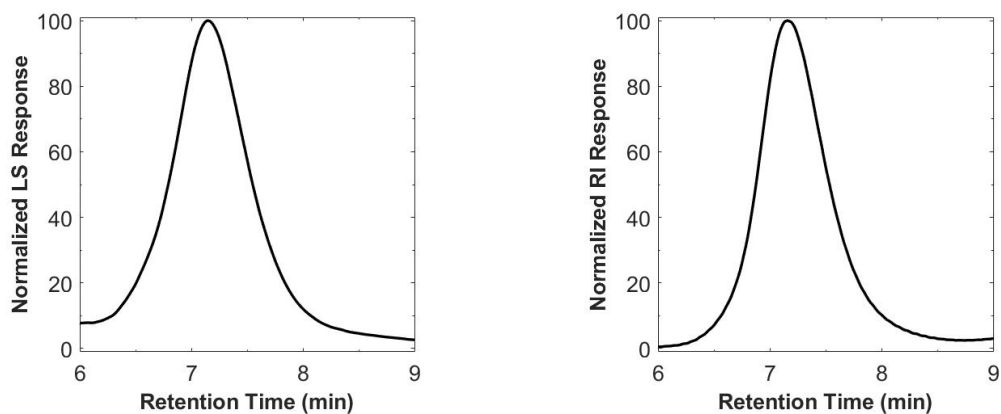

**Fig. S200** GPC spectrum of PDL 300 equivalents generated by **8**/[Ph<sub>3</sub>C][B(C<sub>6</sub>F<sub>5</sub>)<sub>4</sub>] from **Table S1**, entry 4 (6 h): (left) LS; (right) RI.

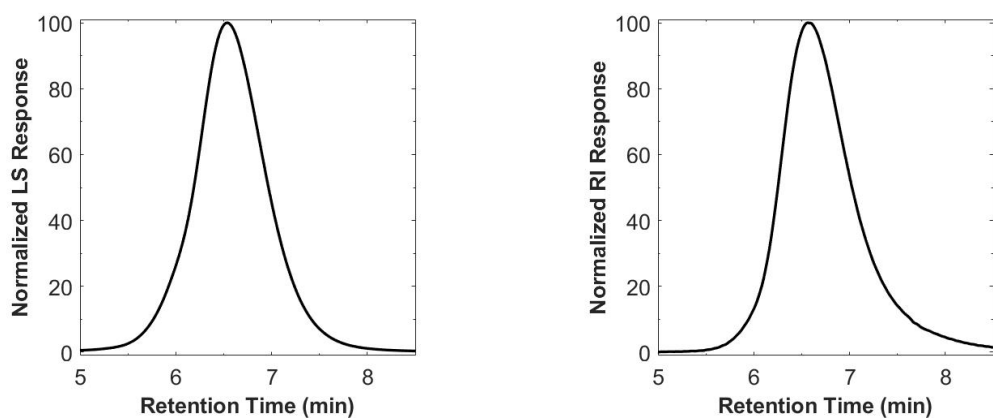

**Fig. S201** GPC spectrum of PIP 300 equivalents generated by **6**/[Ph<sub>3</sub>C][B(C<sub>6</sub>F<sub>5</sub>)<sub>4</sub>] from **Table S2**, entry 1a (12 h): (left) LS; (right) RI.

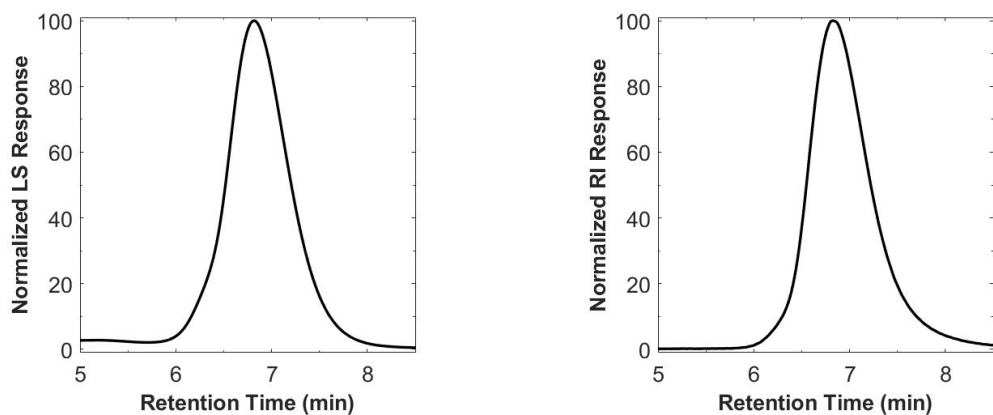

**Fig. S202** GPC spectrum of PIP 300 equivalents generated by **6**/[Ph<sub>3</sub>C][B(C<sub>6</sub>F<sub>5</sub>)<sub>4</sub>] from **Table S2**, entry 1b (12 h): (left) LS; (right) RI.

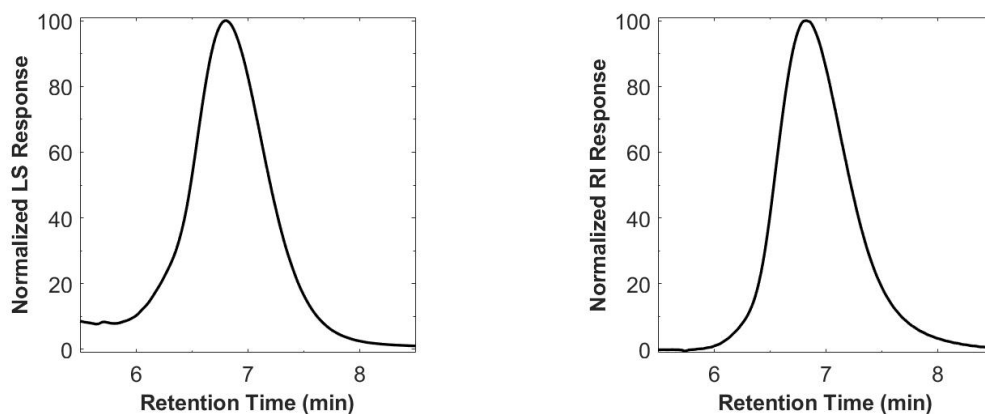

**Fig. S203** GPC spectrum of PIP 300 equivalents generated by **6**/[Ph<sub>3</sub>C][B(C<sub>6</sub>F<sub>5</sub>)<sub>4</sub>] from **Table S2**, entry 1c (12 h): (left) LS; (right) RI.

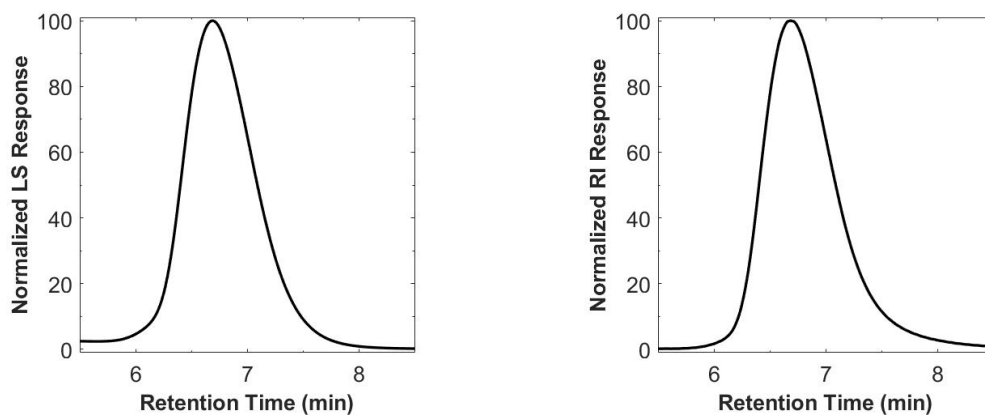

**Fig. S204** GPC spectrum of PIP 550 equivalents generated by **6**/[Ph<sub>3</sub>C][B(C<sub>6</sub>F<sub>5</sub>)<sub>4</sub>] from **Table S2**, entry 2a (12 h): (left) LS; (right) RI.

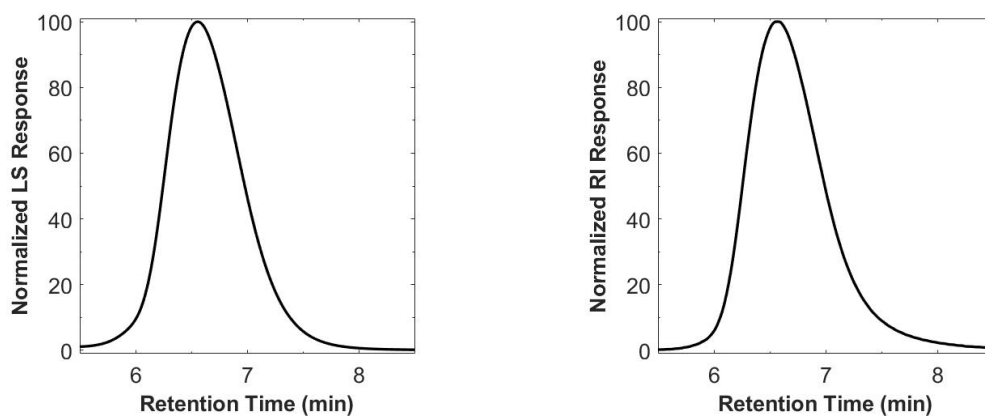

**Fig. S205** GPC spectrum of PIP 550 equivalents generated by **6**/[Ph<sub>3</sub>C][B(C<sub>6</sub>F<sub>5</sub>)<sub>4</sub>] from **Table S2**, entry 2b (12 h): (left) LS; (right) RI.

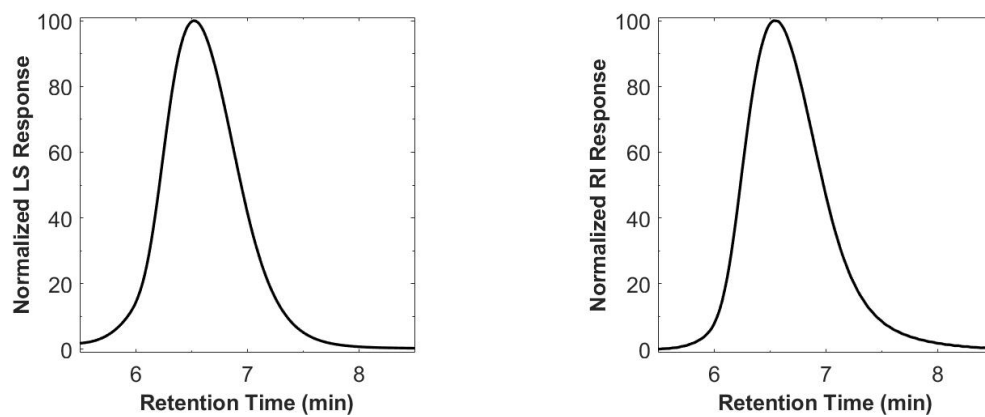

**Fig. S206** GPC spectrum of PIP 550 equivalents generated by **6**/[Ph<sub>3</sub>C][B(C<sub>6</sub>F<sub>5</sub>)<sub>4</sub>] from **Table S2**, entry 2c (12 h): (left) LS; (right) RI.

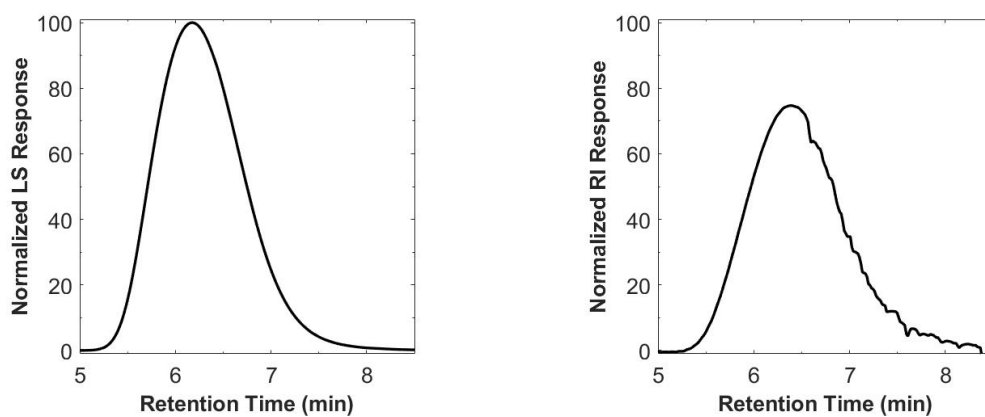

**Fig. S207** GPC spectrum of PCL 550 equivalents generated by **6**/[Ph<sub>3</sub>C][B(C<sub>6</sub>F<sub>5</sub>)<sub>4</sub>] from **Table S2**, entry 3a (2 h): (left) LS; (right) RI.

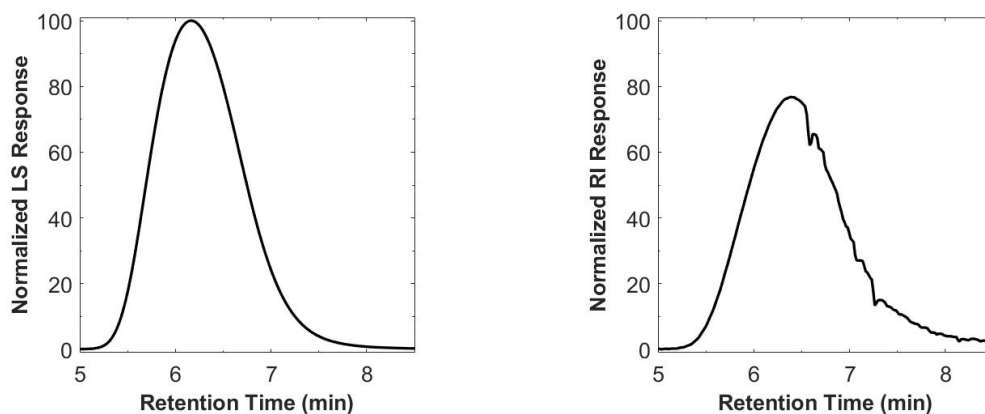

**Fig. S208** GPC spectrum of PCL 550 equivalents generated by **6**/[Ph<sub>3</sub>C][B(C<sub>6</sub>F<sub>5</sub>)<sub>4</sub>] from **Table S2**, entry 3b (2 h): (left) LS; (right) RI.

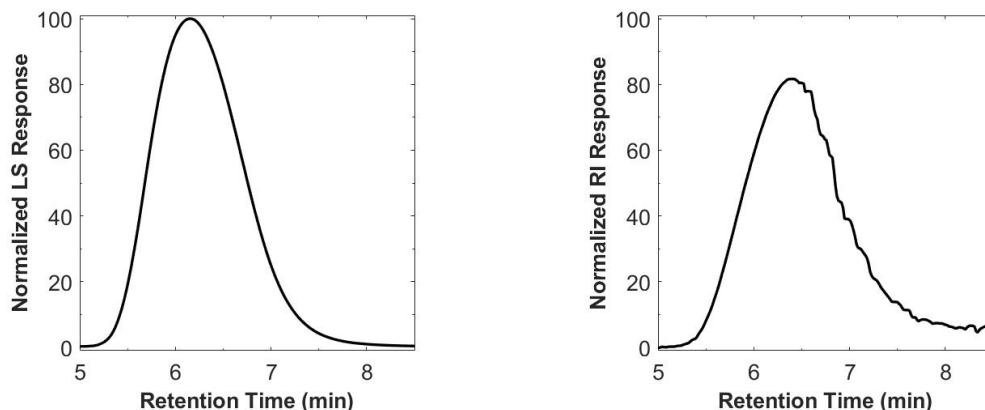

**Fig. S209** GPC spectrum of PCL 550 equivalents generated by **6**/[Ph<sub>3</sub>C][B(C<sub>6</sub>F<sub>5</sub>)<sub>4</sub>] from **Table S2**, entry 3c (2 h): (left) LS; (right) RI.

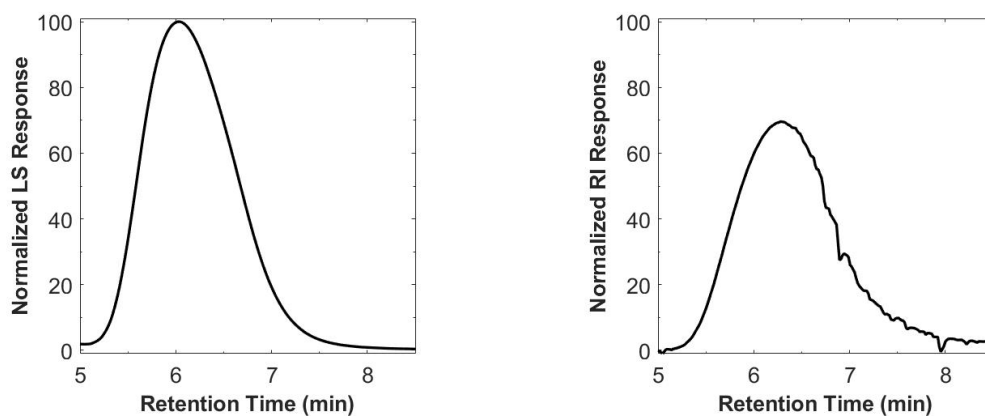

**Fig. S210** GPC spectrum of PCL 800 equivalents generated by **6**/[Ph<sub>3</sub>C][B(C<sub>6</sub>F<sub>5</sub>)<sub>4</sub>] from **Table S2**, entry 4a (2 h): (left) LS; (right) RI.



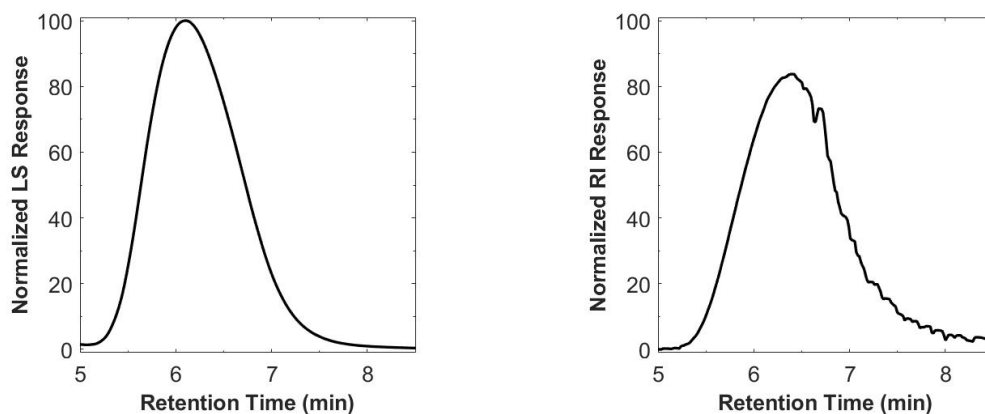

**Fig. S211** GPC spectrum of PCL 800 equivalents generated by **6**/[Ph<sub>3</sub>C][B(C<sub>6</sub>F<sub>5</sub>)<sub>4</sub>] from **Table S2**, entry 4b (2 h): (left) LS; (right) RI.

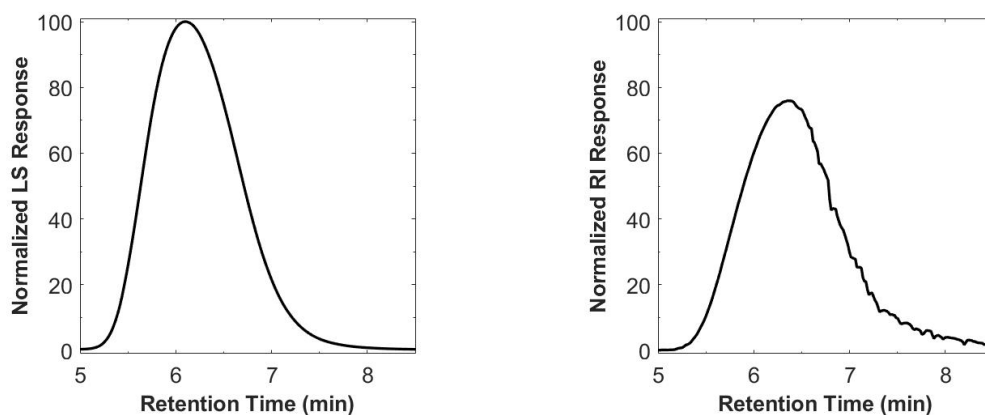

**Fig. S212** GPC spectrum of PCL 800 equivalents generated by **6**/[Ph<sub>3</sub>C][B(C<sub>6</sub>F<sub>5</sub>)<sub>4</sub>] from **Table S2**, entry 4c (2 h): (left) LS; (right) RI.

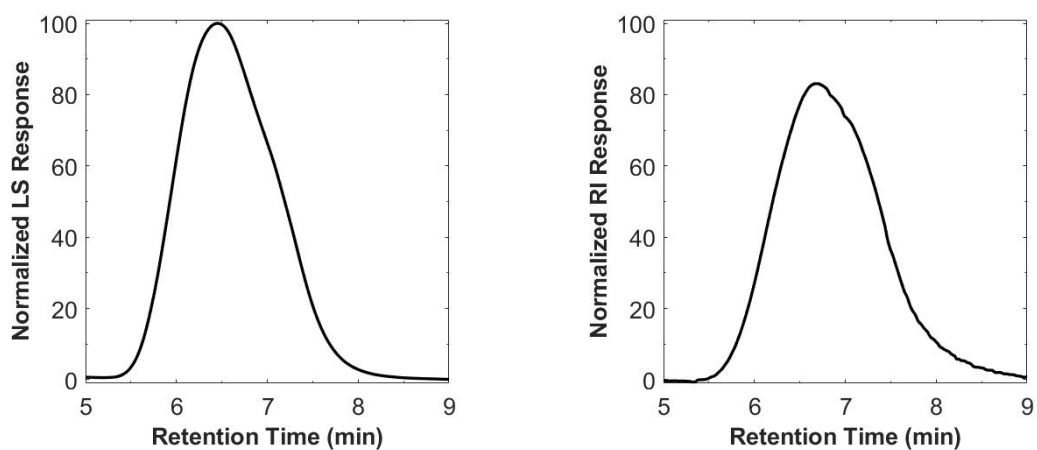

**Fig. S213** GPC spectrum of PCL 300 equivalents generated by **6** from **Table S2**, entry 5 (No  $[\text{Ph}_3\text{C}][\text{B}(\text{C}_6\text{F}_5)_4]$  added) (10 min): (left) LS; (right) RI.

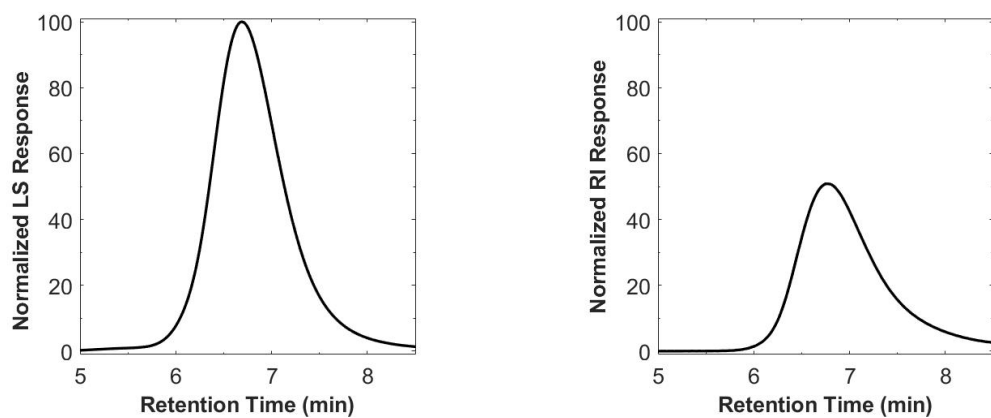

**Fig. S214** GPC spectrum of PIP 50 equivalents generated by **6**/ $[\text{Ph}_3\text{C}][\text{B}(\text{C}_6\text{F}_5)_4]$  from **Table S3**, entry 1 (12 h): (left) LS; (right) RI.

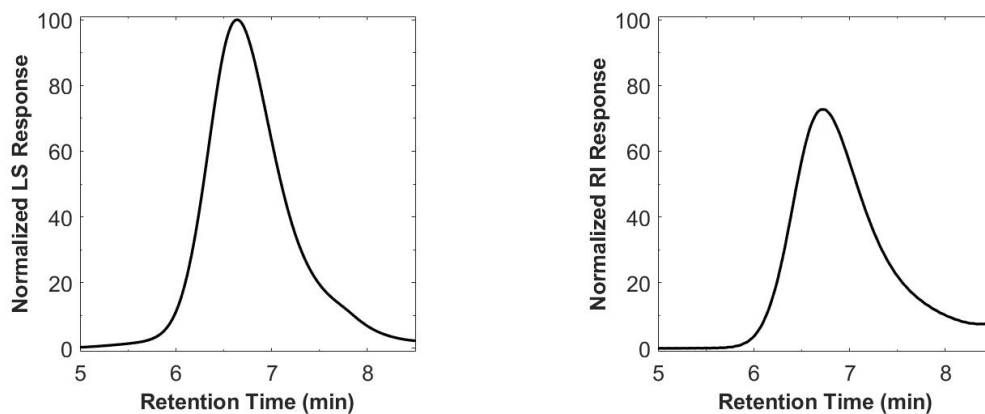

**Fig. S215** GPC spectrum of PIP-*b*-PCL 50:50 equivalents generated by **6**/[Ph<sub>3</sub>C][B(C<sub>6</sub>F<sub>5</sub>)<sub>4</sub>] from **Table S3**, entry 2: (left) LS; (right) RI.

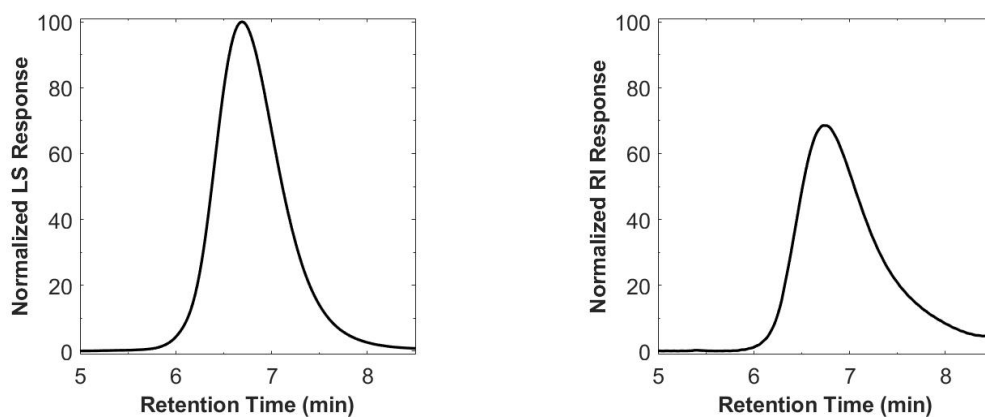

**Fig. S216** GPC spectrum of recovered PIP 50 equivalents after hydrolysis of PIP-*b*-PCL 50:50 from **Table S3**, entry 3 (12 h): (left) LS; (right) RI.

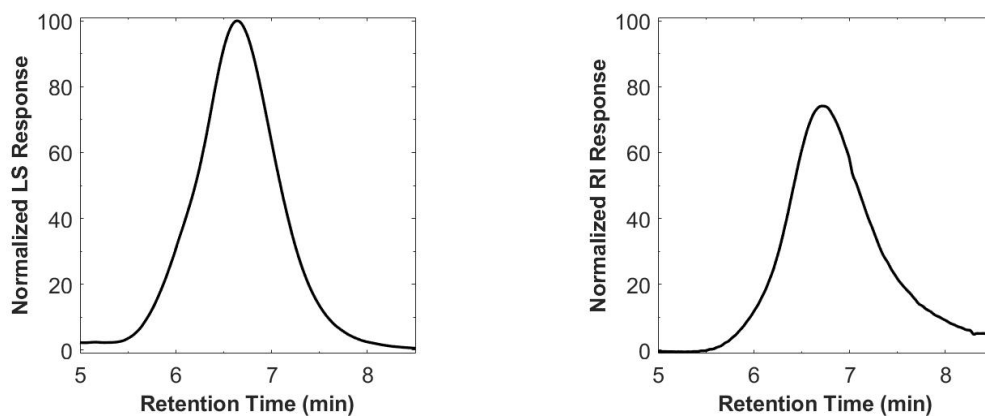

**Fig. S217** GPC spectrum of repolymerized PIP-*b*-PCL 50:50 equivalents generated by  $\text{Y}[\text{N}(\text{SiMe}_3)_2]_3$  from **Table S3**, entry 4 (6 h): (left) LS; (right) RI.

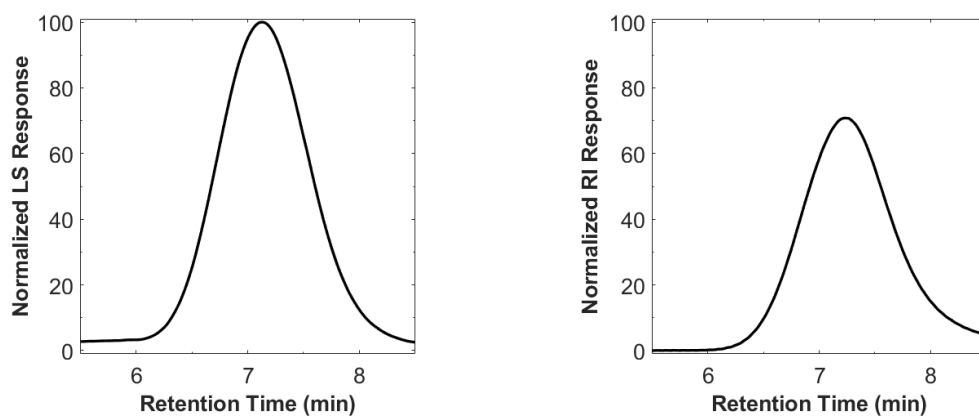

**Fig. S218** GPC spectrum of PIP-*b*-PCL 50:50 equivalents generated by **6**/[Ph<sub>3</sub>C][B(C<sub>6</sub>F<sub>5</sub>)<sub>4</sub>] (1 mL of toluene) from **Table S3**, entry 5: (left) LS; (right) RI.

## 6.0 Thermogravimetric Analysis (TGA) of Isolated Polymers

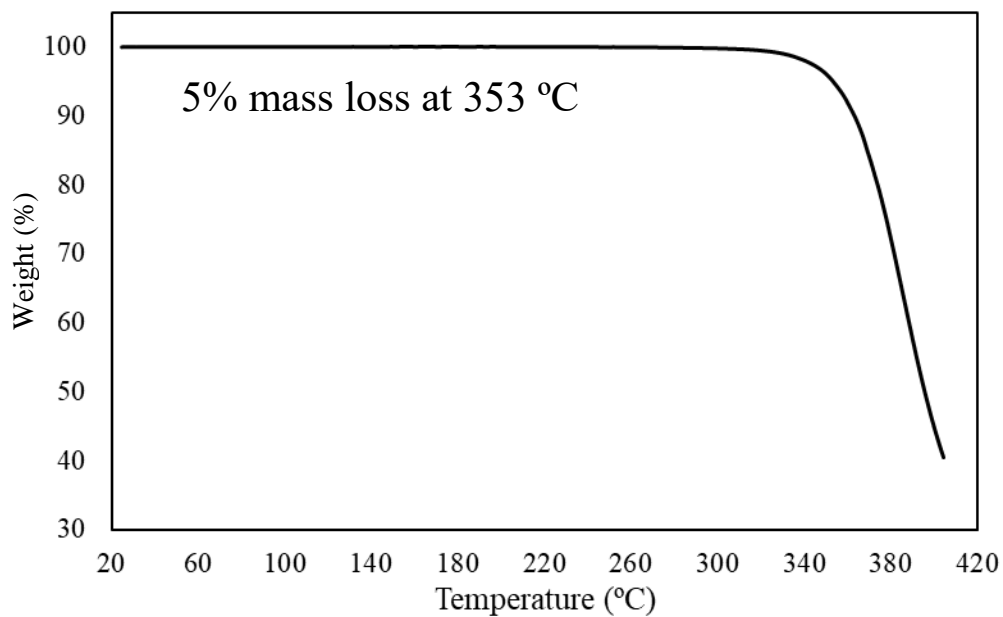

**Fig. S219** TGA curve of PIP 800 equivalents generated by **6**/[Ph<sub>3</sub>C][B(C<sub>6</sub>F<sub>5</sub>)<sub>4</sub>] from **Table 1**, entry 1a (12 h).

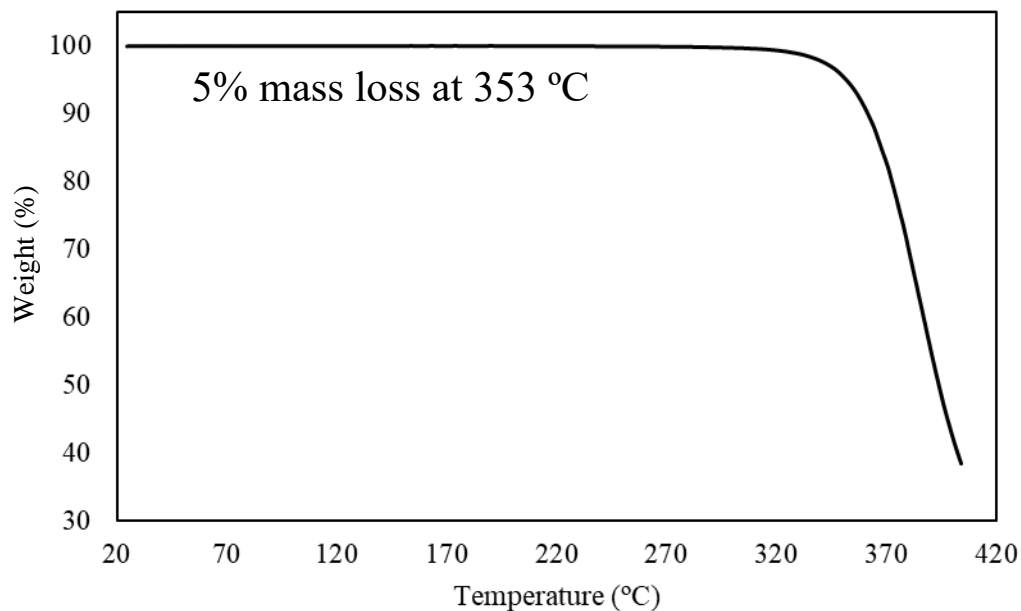

**Fig. S220** TGA curve of PIP 800 equivalents generated by **6**/[Ph<sub>3</sub>C][B(C<sub>6</sub>F<sub>5</sub>)<sub>4</sub>] from **Table 1**, entry 1b (12 h).

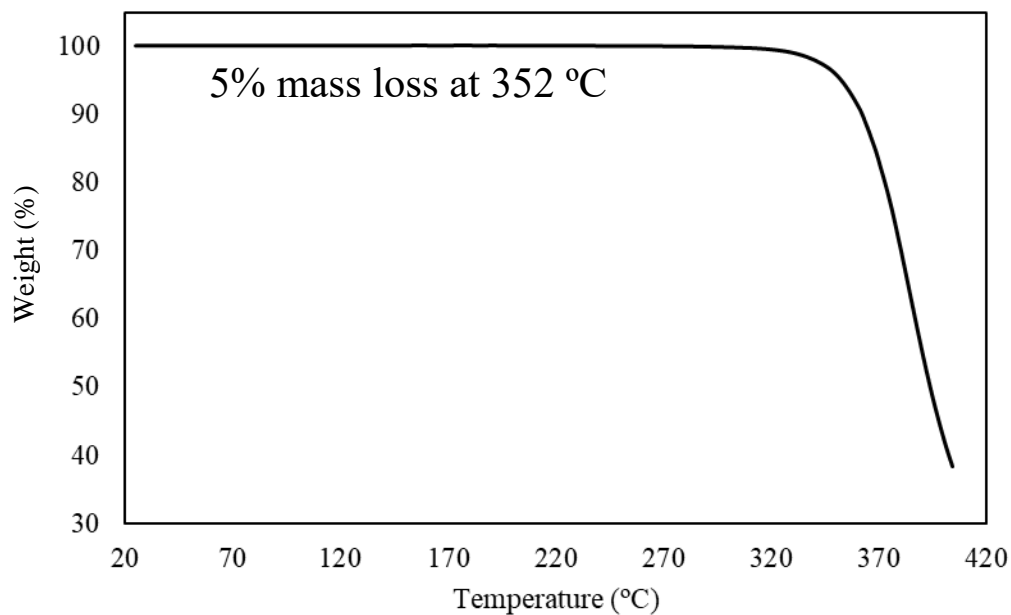

**Fig. S221** TGA curve of PIP 800 equivalents generated by **6**/[Ph<sub>3</sub>C][B(C<sub>6</sub>F<sub>5</sub>)<sub>4</sub>] from **Table 1**, entry 1c (12 h).

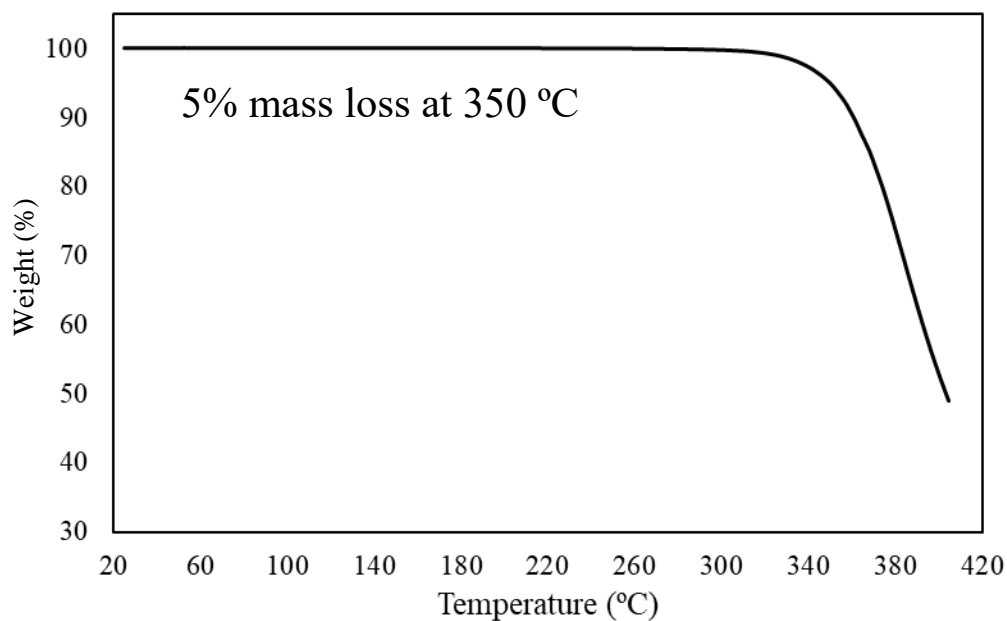

**Fig. S222** TGA curve of PIP 800 equivalents generated by **8**/[Ph<sub>3</sub>C][B(C<sub>6</sub>F<sub>5</sub>)<sub>4</sub>] from **Table 1**, entry 3 (12 h).

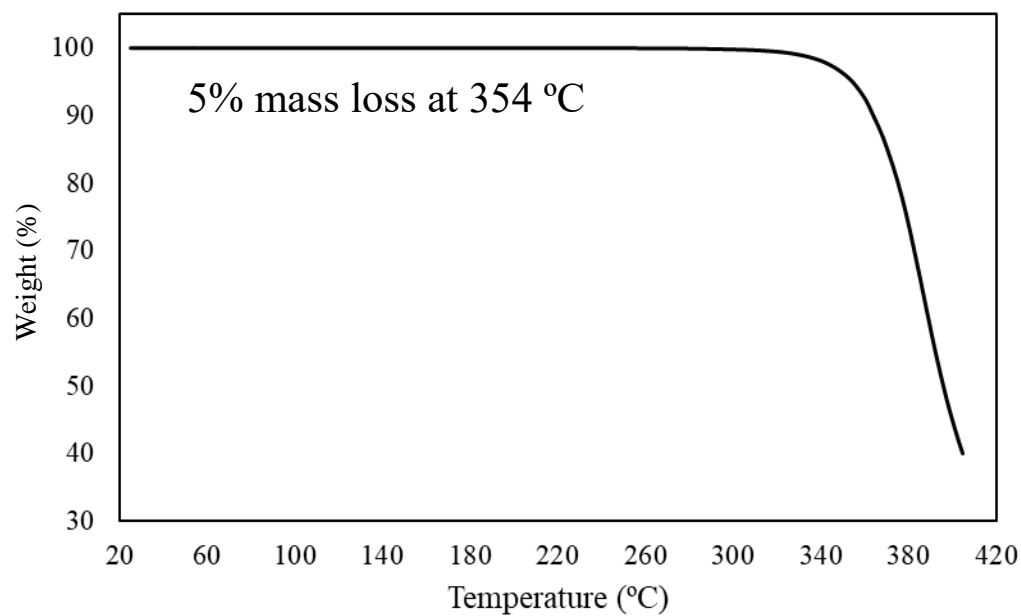

**Fig. S223** TGA curve of PIP 800 equivalents generated by **6**/[Ph<sub>3</sub>C][B(C<sub>6</sub>F<sub>5</sub>)<sub>4</sub>] from **Table 1**, entry 4 (24 h).

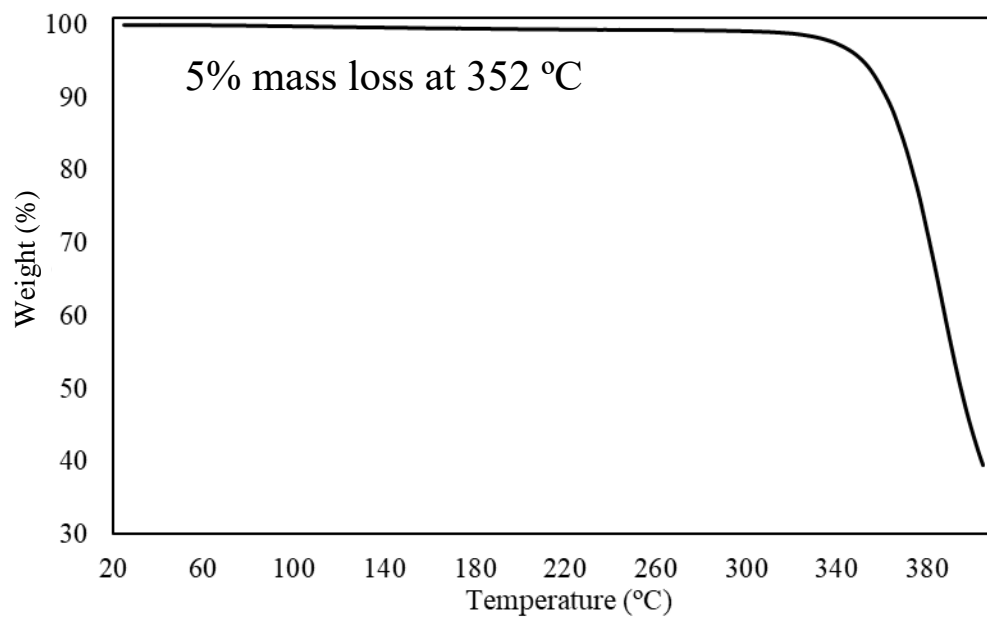

**Fig. S224** TGA curve of PIP 800 equivalents generated by **6**/[Ph<sub>3</sub>C][B(C<sub>6</sub>F<sub>5</sub>)<sub>4</sub>] from **Table 1**, entry 5 (30 min).

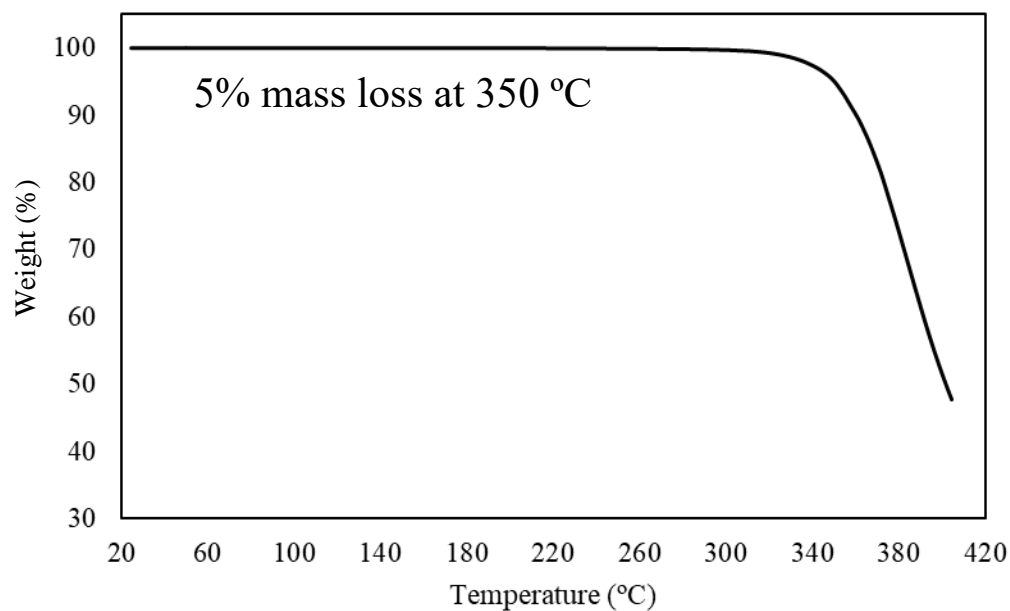

**Fig. S225** TGA curve of PIP 800 equivalents generated by **8**/[Ph<sub>3</sub>C][B(C<sub>6</sub>F<sub>5</sub>)<sub>4</sub>] from **Table 1**, entry 6 (30 min).

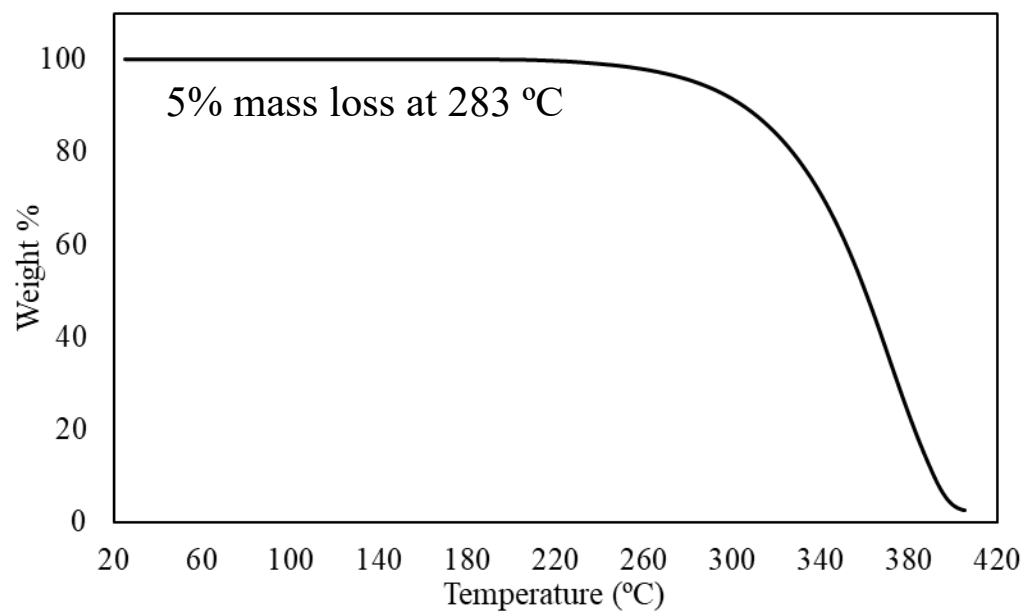

**Fig. S226** TGA curve of PCL 300 equivalents generated by **6**/[Ph<sub>3</sub>C][B(C<sub>6</sub>F<sub>5</sub>)<sub>4</sub>] from **Table 1**, entry 7 (10 min).



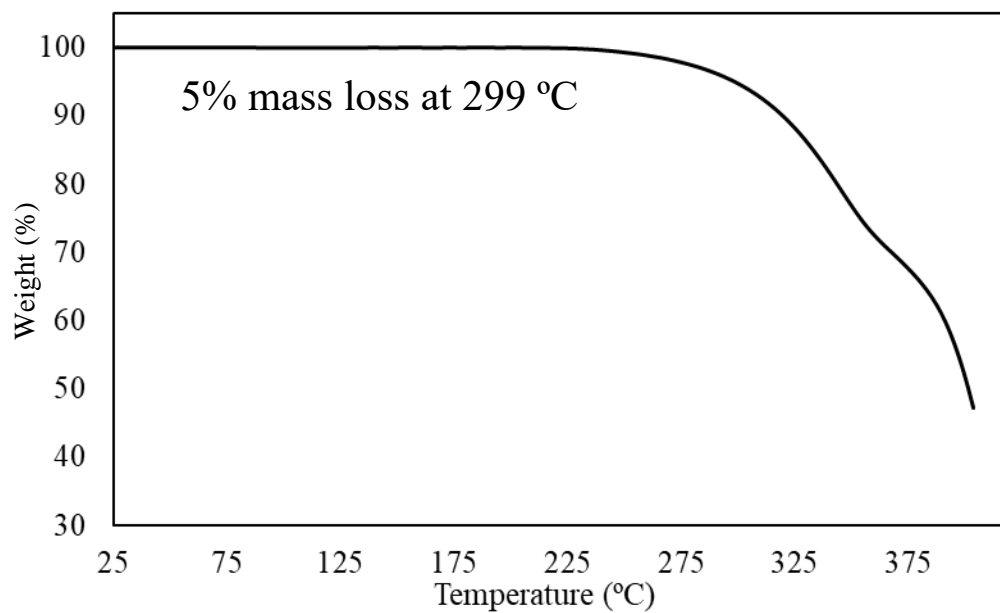

**Fig. S227** TGA curve of PCL 300 equivalents generated by **8**/[Ph<sub>3</sub>C][B(C<sub>6</sub>F<sub>5</sub>)<sub>4</sub>] from **Table 1**, entry 8 (10 min).

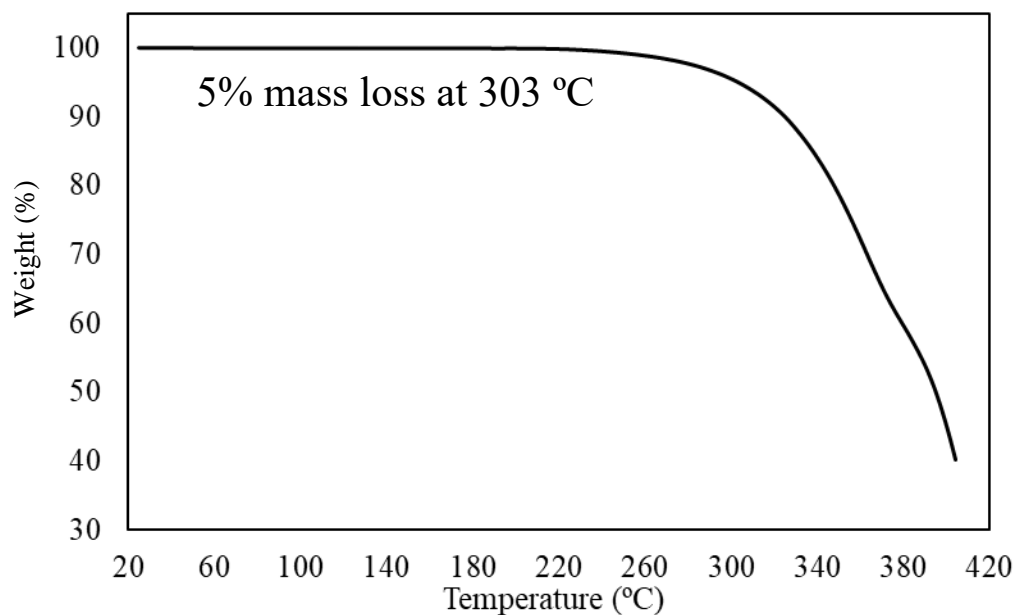

**Fig. S228** TGA curve of PCL 300 equivalents generated by **6**/[Ph<sub>3</sub>C][B(C<sub>6</sub>F<sub>5</sub>)<sub>4</sub>] from **Table 1**, entry 9a (2 h).

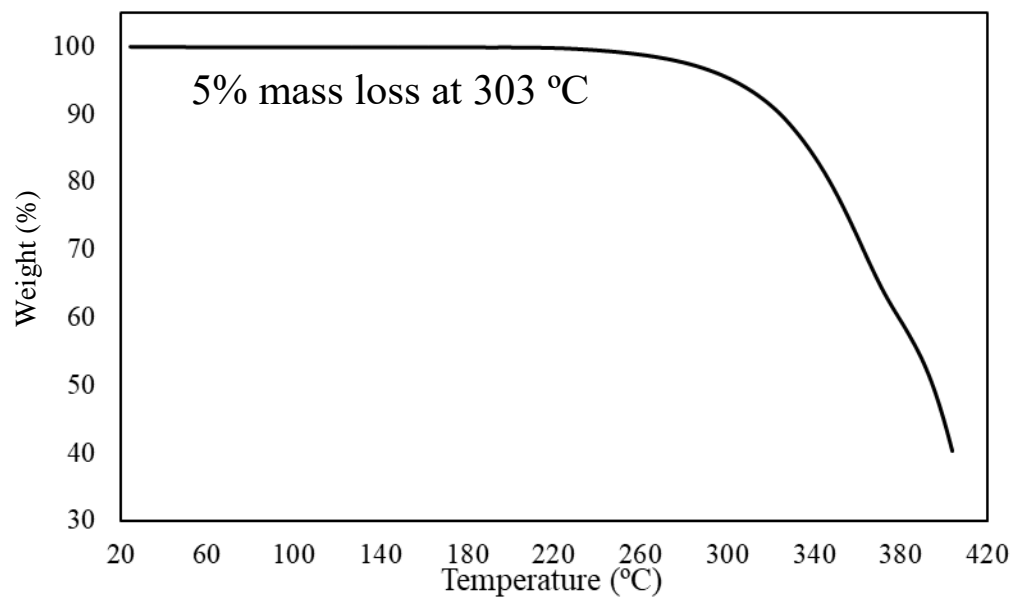

**Fig. S229** TGA curve of PCL 300 equivalents generated by **6**/[Ph<sub>3</sub>C][B(C<sub>6</sub>F<sub>5</sub>)<sub>4</sub>] from **Table 1**, entry 9b (2 h).

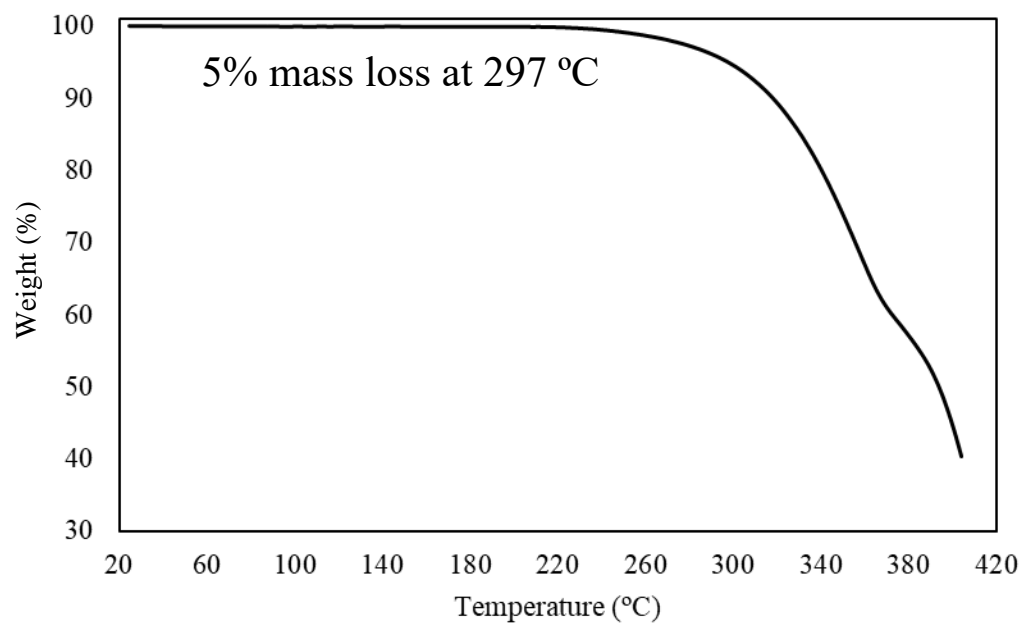

**Fig. S230** TGA curve of PCL 300 equivalents generated by **6**/[Ph<sub>3</sub>C][B(C<sub>6</sub>F<sub>5</sub>)<sub>4</sub>] from **Table 1**, entry 9c (2 h).

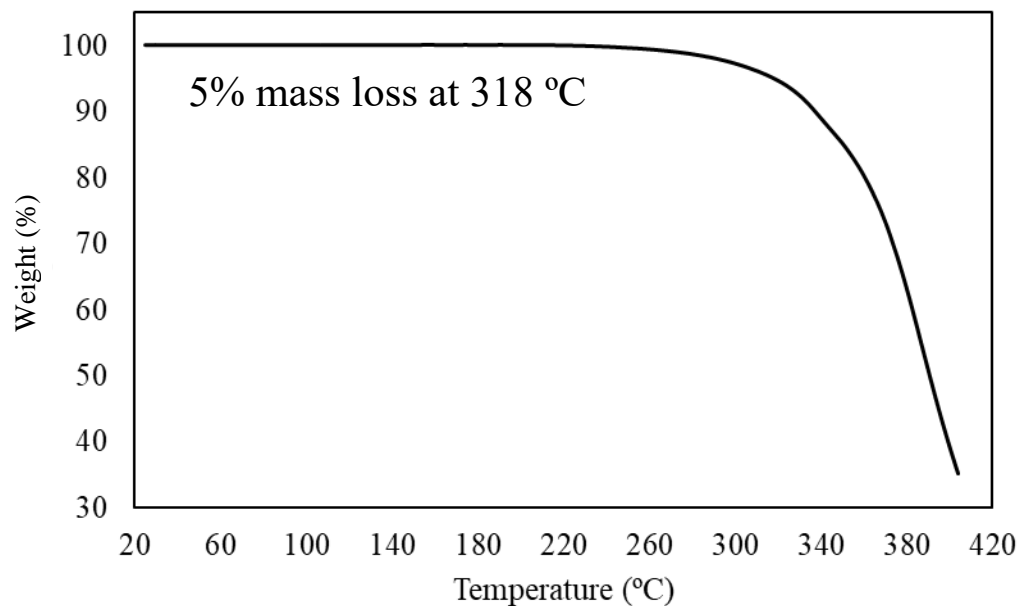

**Fig. S231** TGA curve of PIP-*b*-PCL 800:300 equivalents generated by **6**/[Ph<sub>3</sub>C][B(C<sub>6</sub>F<sub>5</sub>)<sub>4</sub>] from **Table 2**, entry 1a.

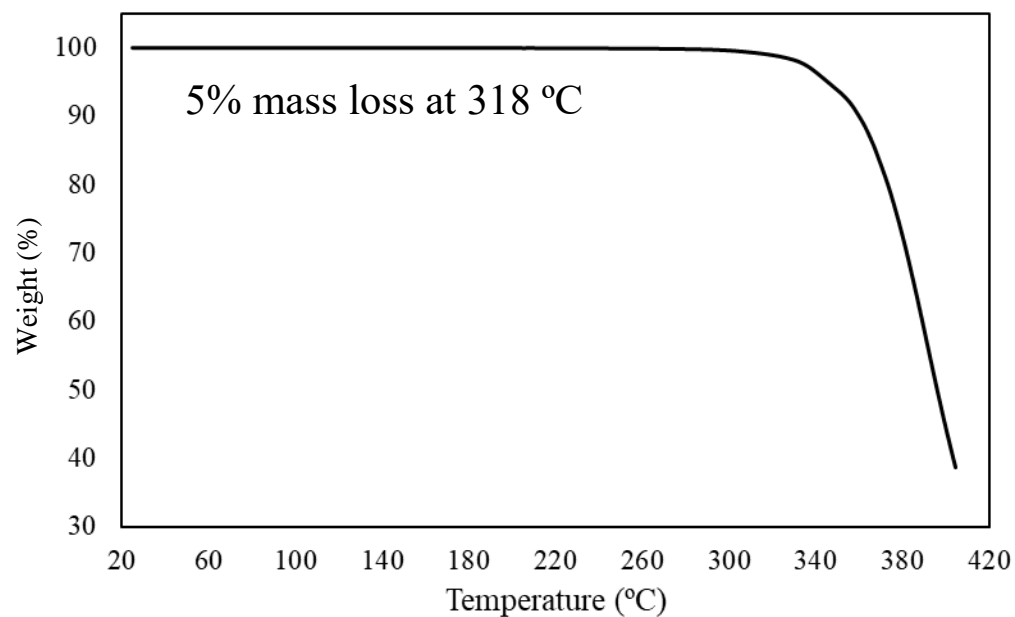

**Fig. S232** TGA curve of PIP-*b*-PCL 800:300 equivalents generated by **6**/[Ph<sub>3</sub>C][B(C<sub>6</sub>F<sub>5</sub>)<sub>4</sub>] from **Table 2**, entry 1b.

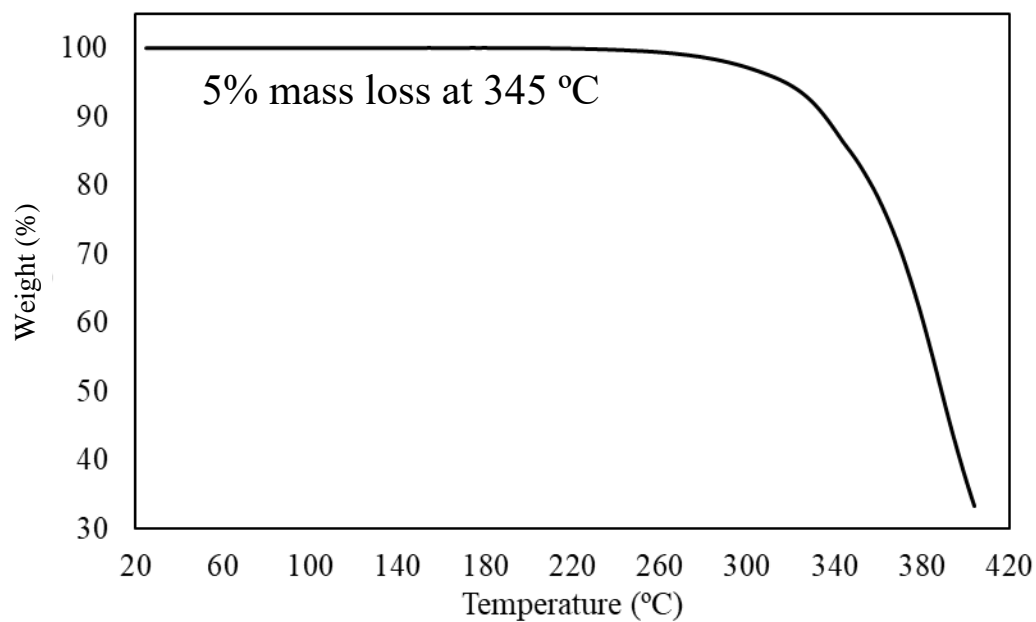

**Fig. S233** TGA curve of PIP-*b*-PCL 800:300 equivalents generated by **6**/[Ph<sub>3</sub>C][B(C<sub>6</sub>F<sub>5</sub>)<sub>4</sub>] from **Table 2**, entry 1c.

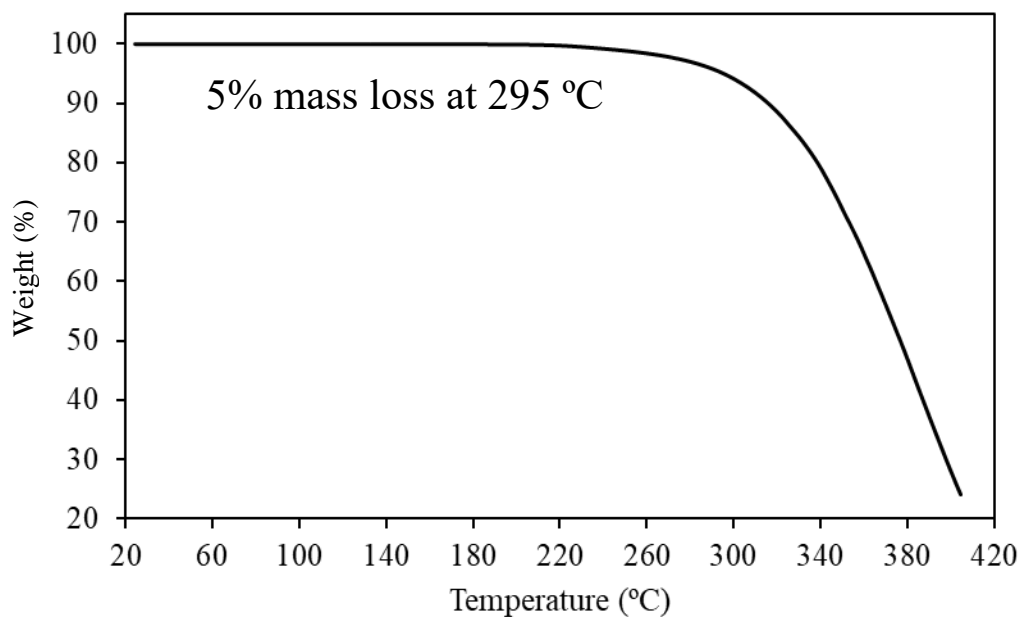

**Fig. S234** TGA curve of PIP-*b*-PCL 550:550 equivalents generated by **6**/[Ph<sub>3</sub>C][B(C<sub>6</sub>F<sub>5</sub>)<sub>4</sub>] from **Table 2**, entry 2a.

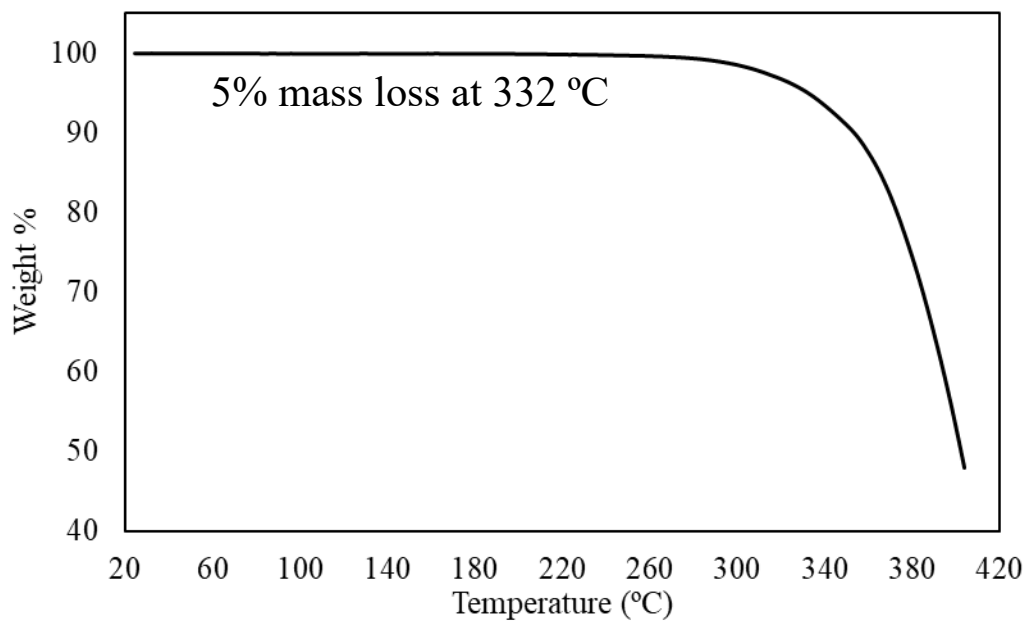

**Fig. S235** TGA curve of PIP-*b*-PCL 550:550 equivalents generated by **6**/[Ph<sub>3</sub>C][B(C<sub>6</sub>F<sub>5</sub>)<sub>4</sub>] from **Table 2**, entry 2b.

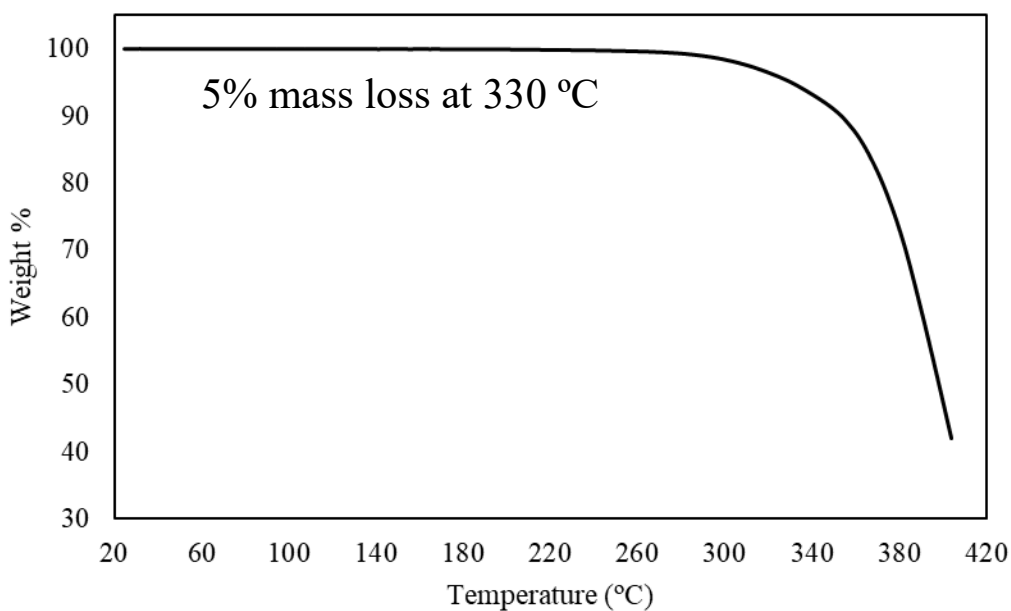

**Fig. S236** TGA curve of PIP-*b*-PCL 550:550 equivalents generated by **6**/[Ph<sub>3</sub>C][B(C<sub>6</sub>F<sub>5</sub>)<sub>4</sub>] from **Table 2**, entry 2c.

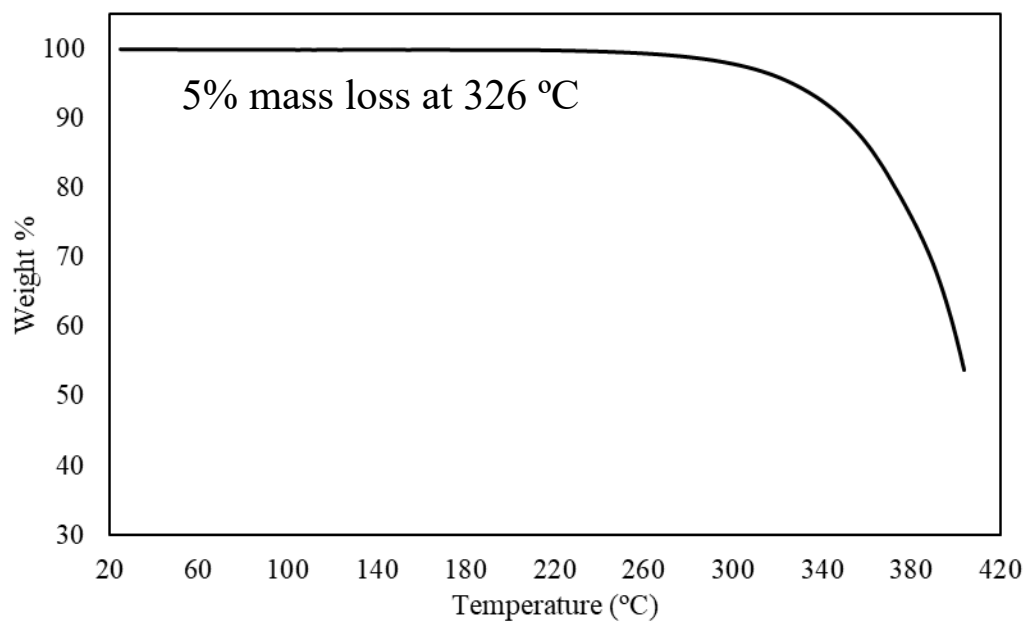

**Fig. S237** TGA curve of PIP-*b*-PCL 300:800 equivalents generated by **6**/[Ph<sub>3</sub>C][B(C<sub>6</sub>F<sub>5</sub>)<sub>4</sub>] from **Table 2**, entry 3a.

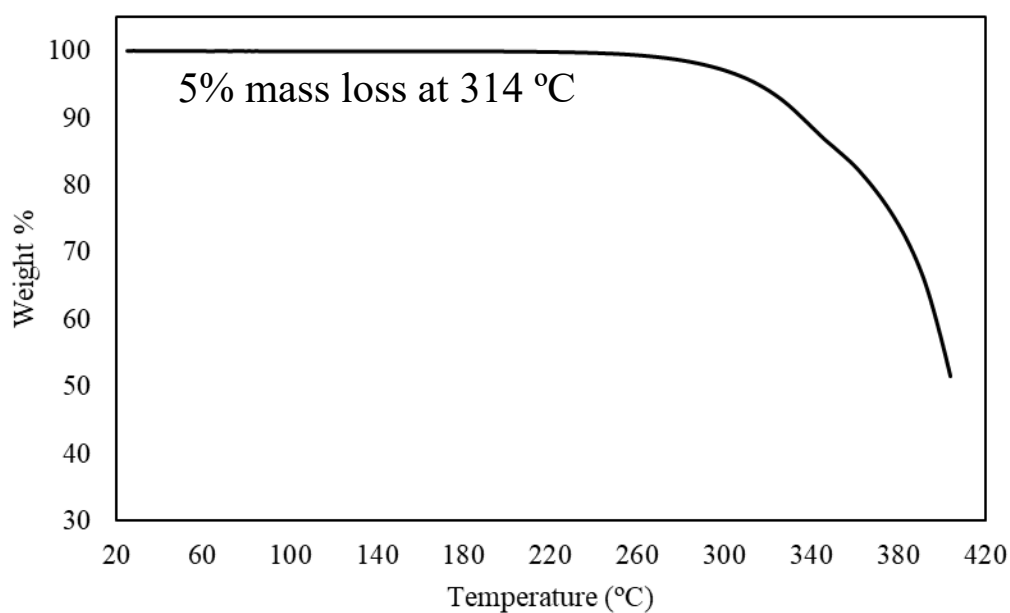

**Fig. S238** TGA curve of PIP-*b*-PCL 300:800 equivalents generated by **6**/[Ph<sub>3</sub>C][B(C<sub>6</sub>F<sub>5</sub>)<sub>4</sub>] from **Table 2**, entry 3b.

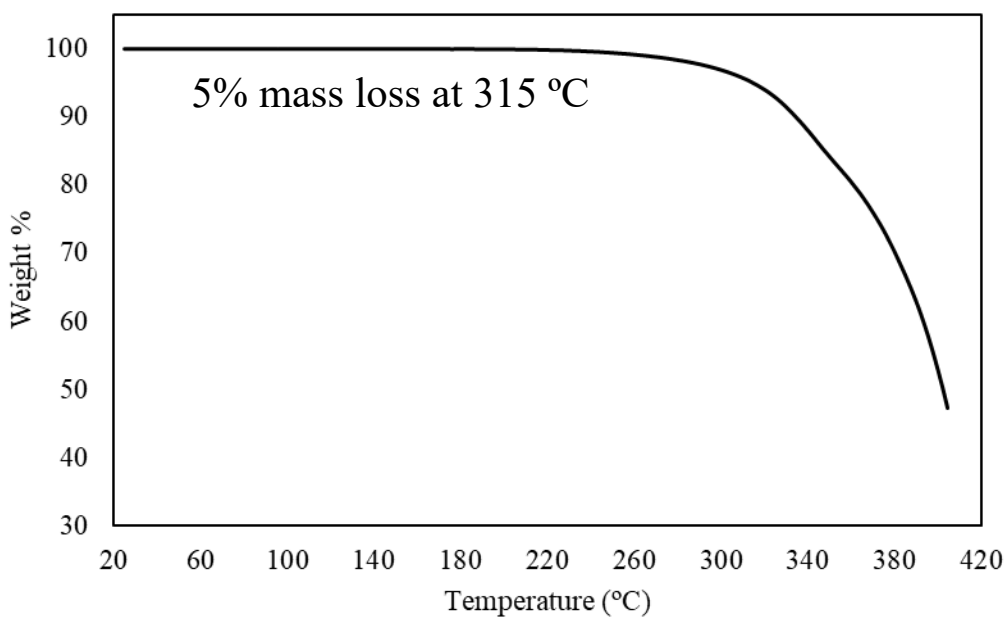

**Fig. S239** TGA curve of PIP-*b*-PCL 300:800 equivalents generated by **6**/[Ph<sub>3</sub>C][B(C<sub>6</sub>F<sub>5</sub>)<sub>4</sub>] from **Table 2** entry 3c.

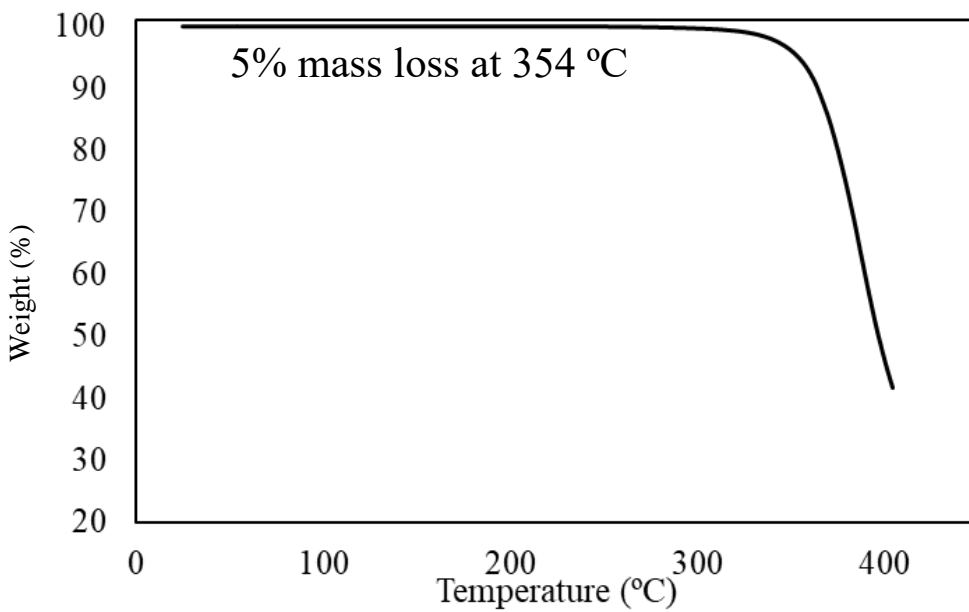

**Fig. S240** TGA curve of PIP 800 equivalents generated by **6**/[Ph<sub>3</sub>C][B(C<sub>6</sub>F<sub>5</sub>)<sub>4</sub>] from **Table 3**, entry 1a (IP addition time 0 min).

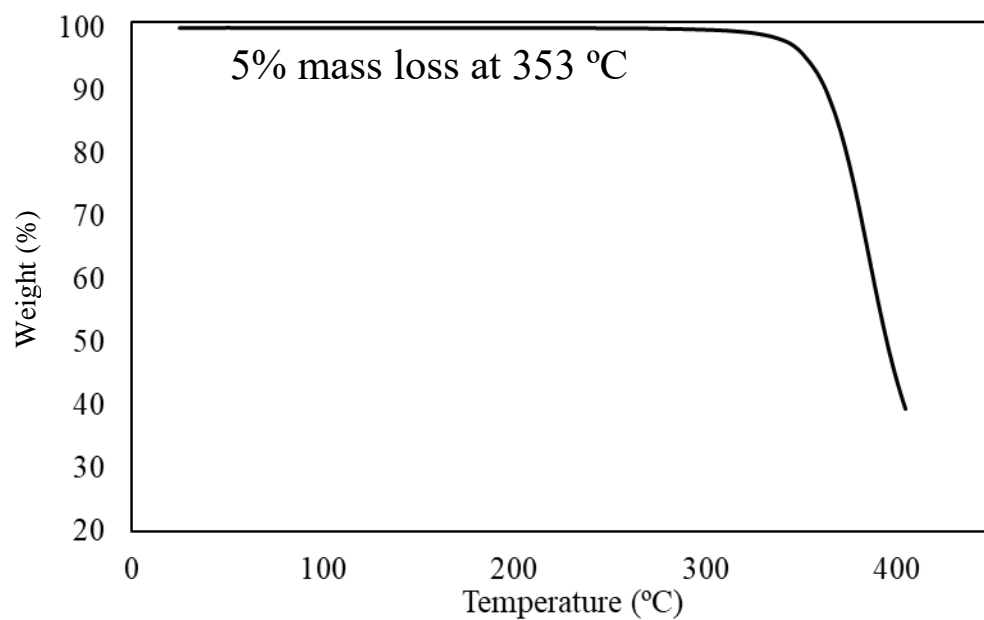

**Fig. S241** TGA curve of PIP 800 equivalents generated by **6**/[Ph<sub>3</sub>C][B(C<sub>6</sub>F<sub>5</sub>)<sub>4</sub>] from **Table 3**, entry 1b (IP addition time 0 min).

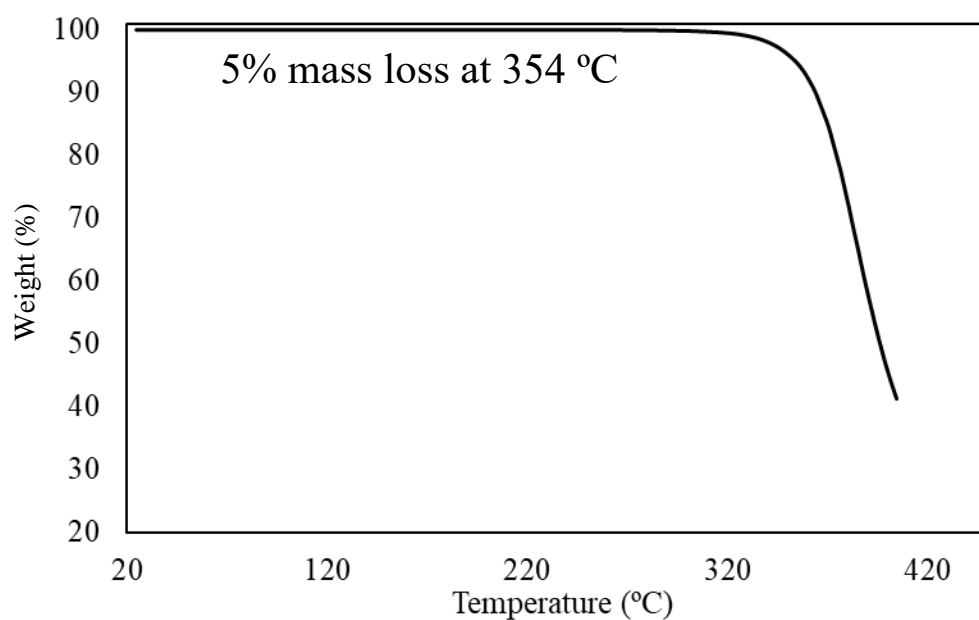

**Fig. S242** TGA curve of PIP 800 equivalents generated by **6**/[Ph<sub>3</sub>C][B(C<sub>6</sub>F<sub>5</sub>)<sub>4</sub>] from **Table 3**, entry 1c (IP addition time 0 min).



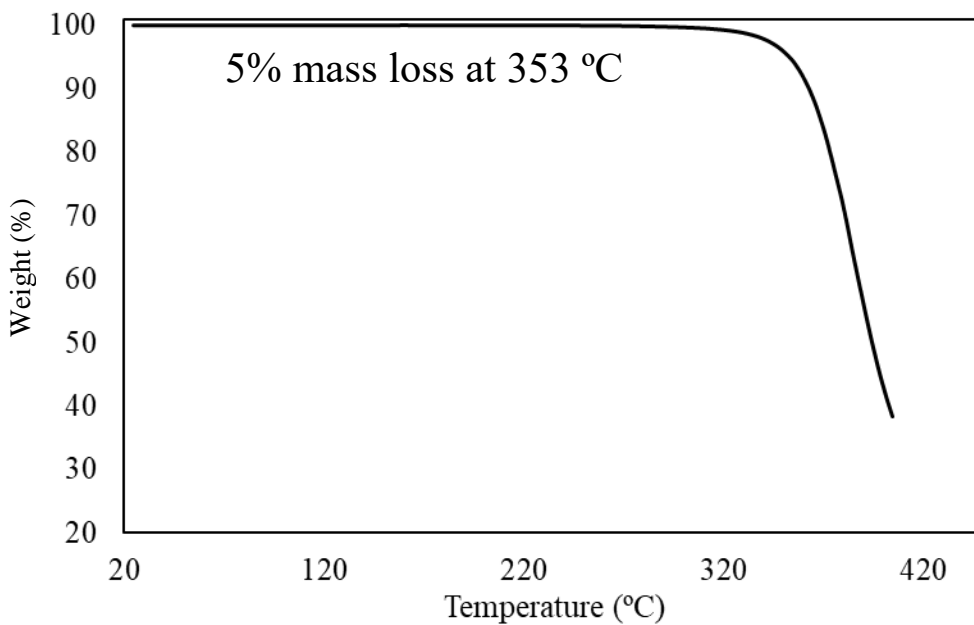

**Fig. S243** TGA curve of PIP 800 equivalents generated by **6**/[Ph<sub>3</sub>C][B(C<sub>6</sub>F<sub>5</sub>)<sub>4</sub>] from **Table 3**, entry 2a (IP addition time 30 min).

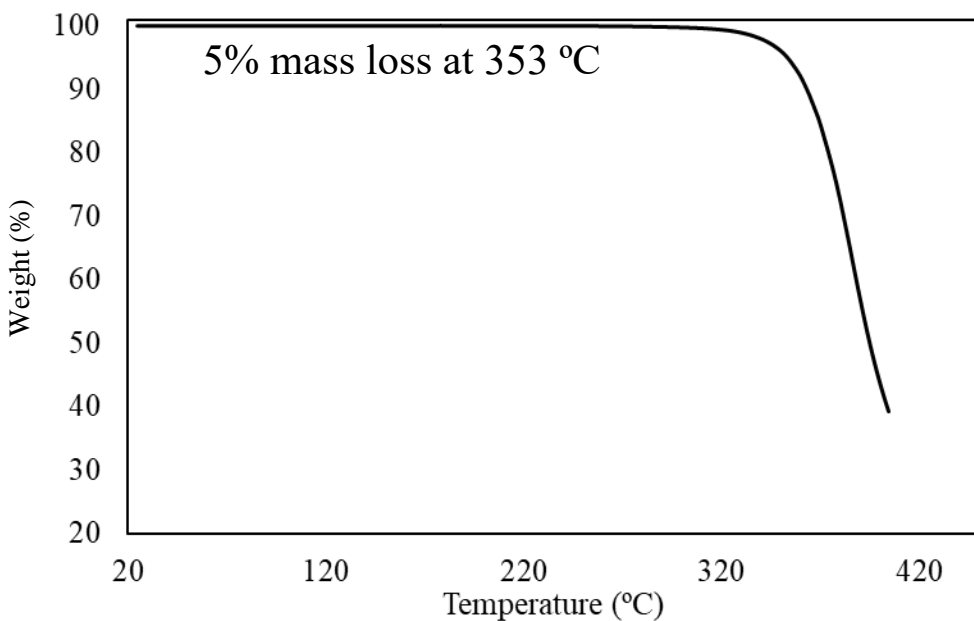

**Fig. S244** TGA curve of PIP 800 equivalents generated by **6**/[Ph<sub>3</sub>C][B(C<sub>6</sub>F<sub>5</sub>)<sub>4</sub>] from **Table 3**, entry 2b (IP addition time 30 min).

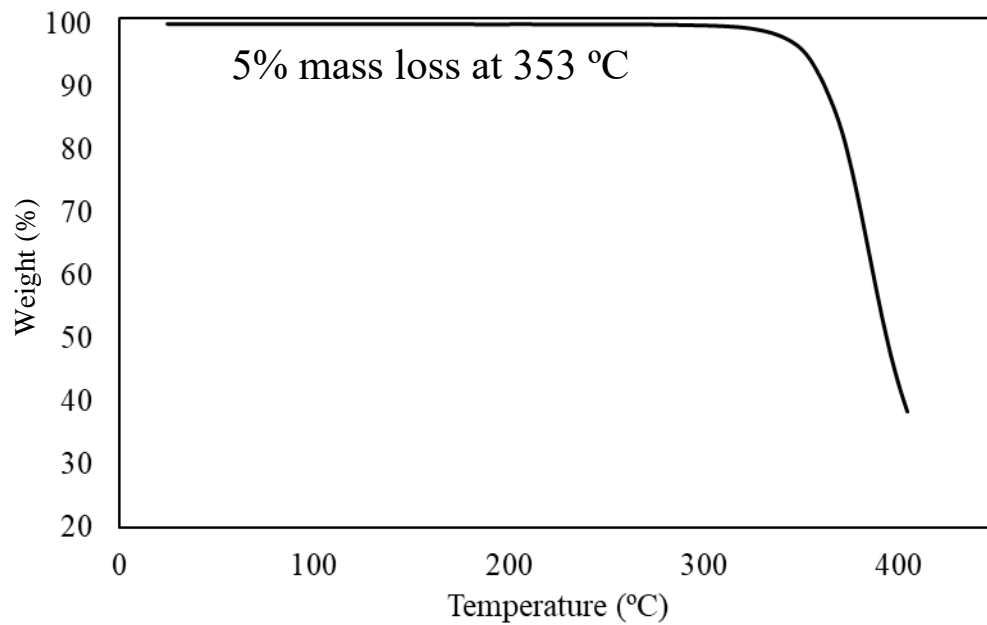

**Fig. S245** TGA curve of PIP 800 equivalents generated by **6**/[Ph<sub>3</sub>C][B(C<sub>6</sub>F<sub>5</sub>)<sub>4</sub>] from **Table 3**, entry 2c (IP addition time 30 min).

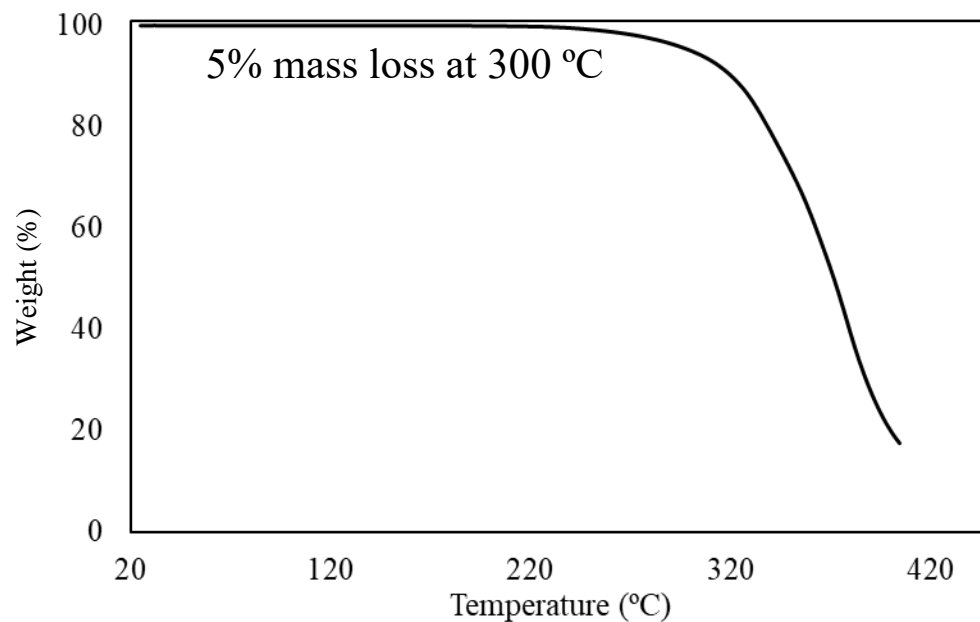

**Fig. S246** TGA curve of PIP-*b*-PCL 800:300 equivalents generated by **6** and 0.5 equivalents of [Ph<sub>3</sub>C][B(C<sub>6</sub>F<sub>5</sub>)<sub>4</sub>] from **Table 3**, entry 3a.

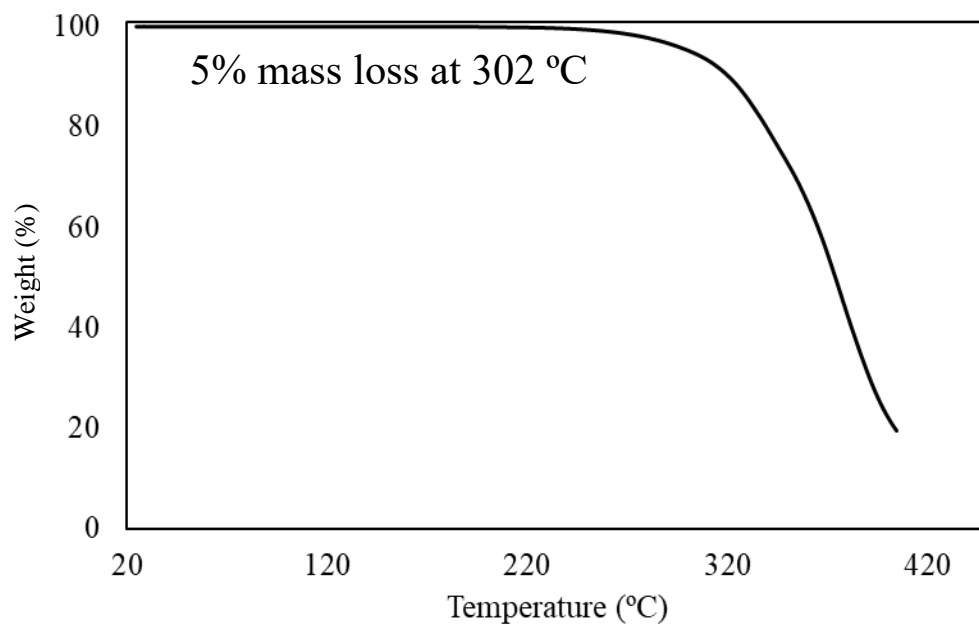

**Fig. S247** TGA curve of PIP-*b*-PCL 800:300 equivalents generated by **6** and 0.5 equivalents of  $[\text{Ph}_3\text{C}][\text{B}(\text{C}_6\text{F}_5)_4]$  from **Table 3**, entry 3b.

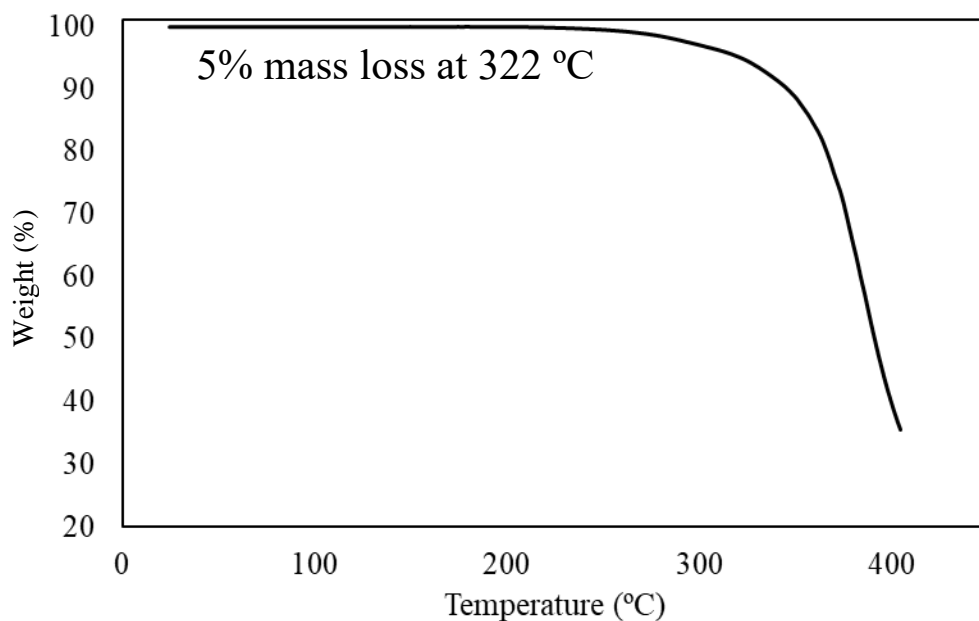

**Fig. S248** TGA curve of PIP-*b*-PCL 800:300 equivalents generated by **6** and 0.5 equivalents of  $[\text{Ph}_3\text{C}][\text{B}(\text{C}_6\text{F}_5)_4]$  from **Table 3**, entry 3c.

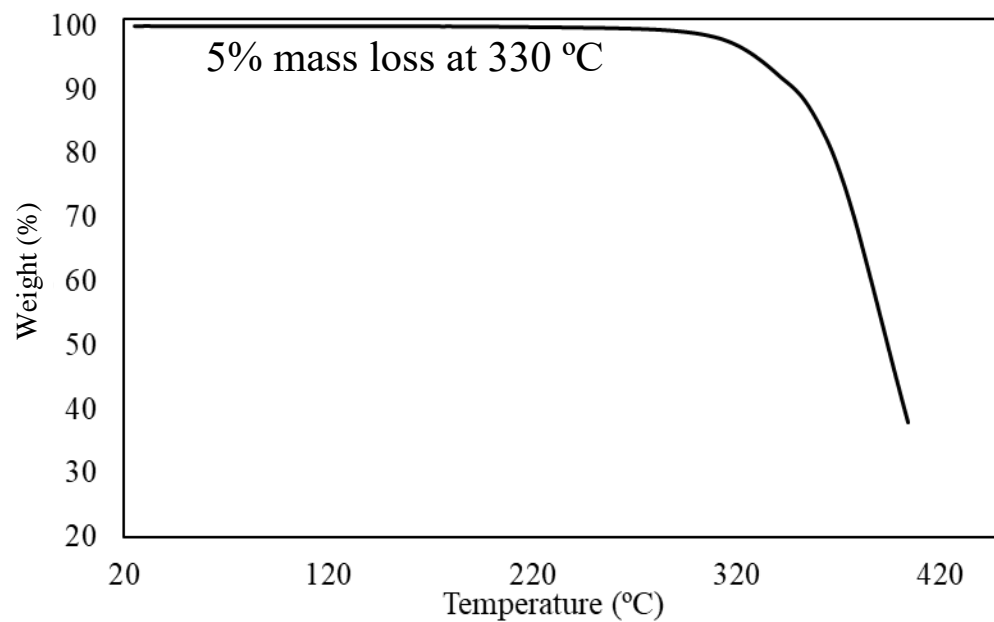

**Fig. S249** TGA curve of PIP-*b*-PCL 800:300 equivalents generated by **6** and 1.5 equivalents of  $[\text{Ph}_3\text{C}][\text{B}(\text{C}_6\text{F}_5)_4]$  from **Table 3**, entry 4a.

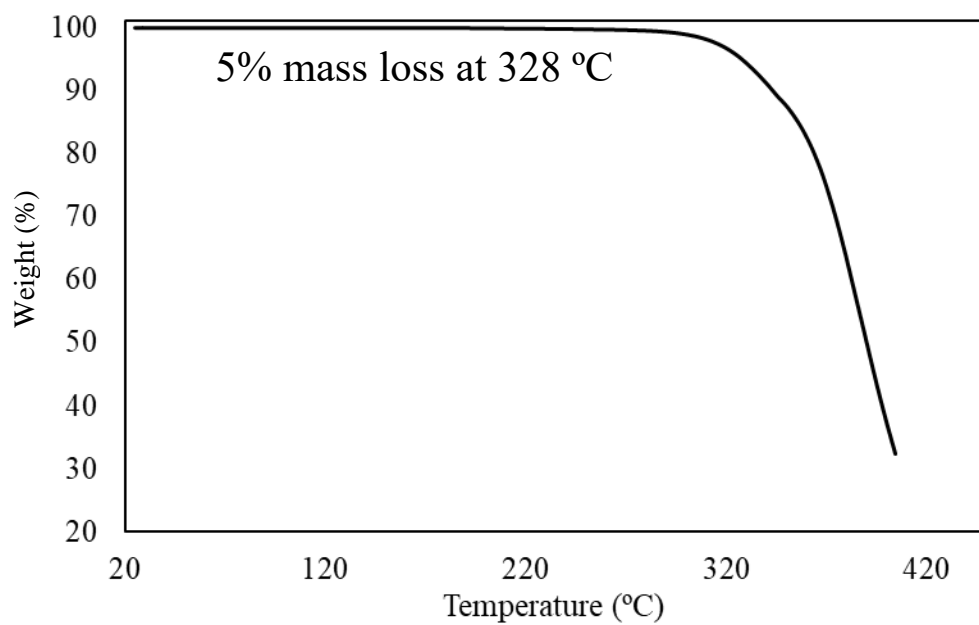

**Fig. S250** TGA curve of PIP-*b*-PCL 800:300 equivalents generated by **6** and 1.5 equivalents of  $[\text{Ph}_3\text{C}][\text{B}(\text{C}_6\text{F}_5)_4]$  from **Table 3**, entry 4b.

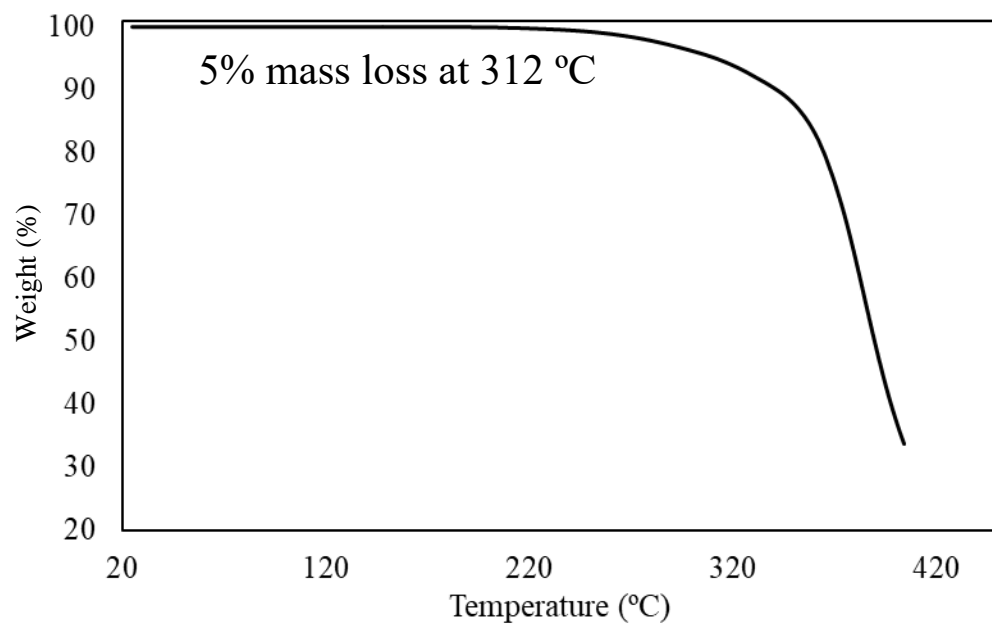

**Fig. S251** TGA curve of PIP-*b*-PCL 800:300 equivalents generated by **6** and 1.5 equivalents of  $[\text{Ph}_3\text{C}][\text{B}(\text{C}_6\text{F}_5)_4]$  from **Table 3**, entry 4c.

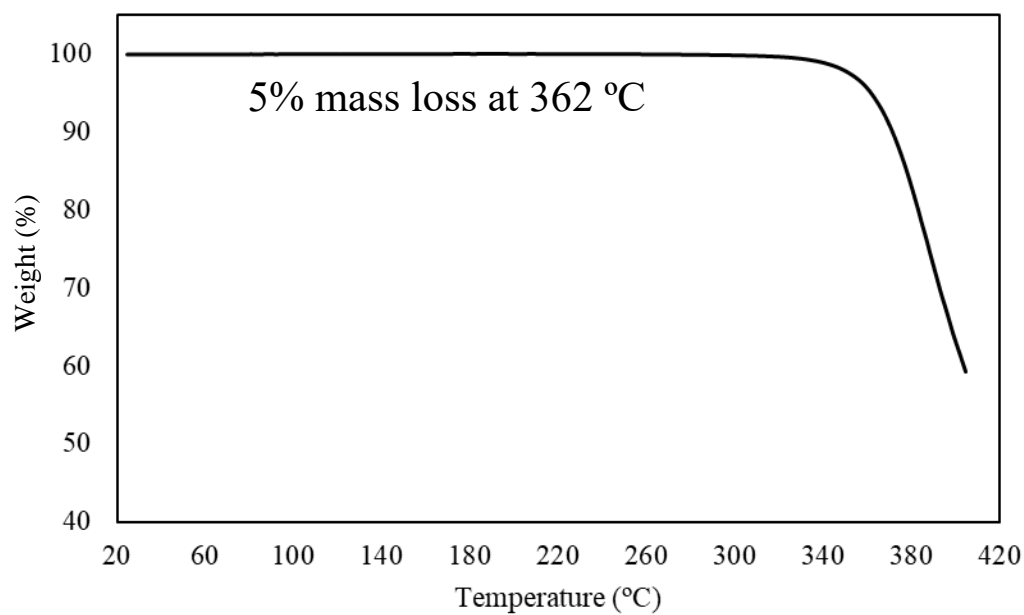

**Fig. S252** TGA curve of PMyr 800 equivalents generated by **6**/ $[\text{Ph}_3\text{C}][\text{B}(\text{C}_6\text{F}_5)_4]$  from **Table 4**, entry 1 (30 min).

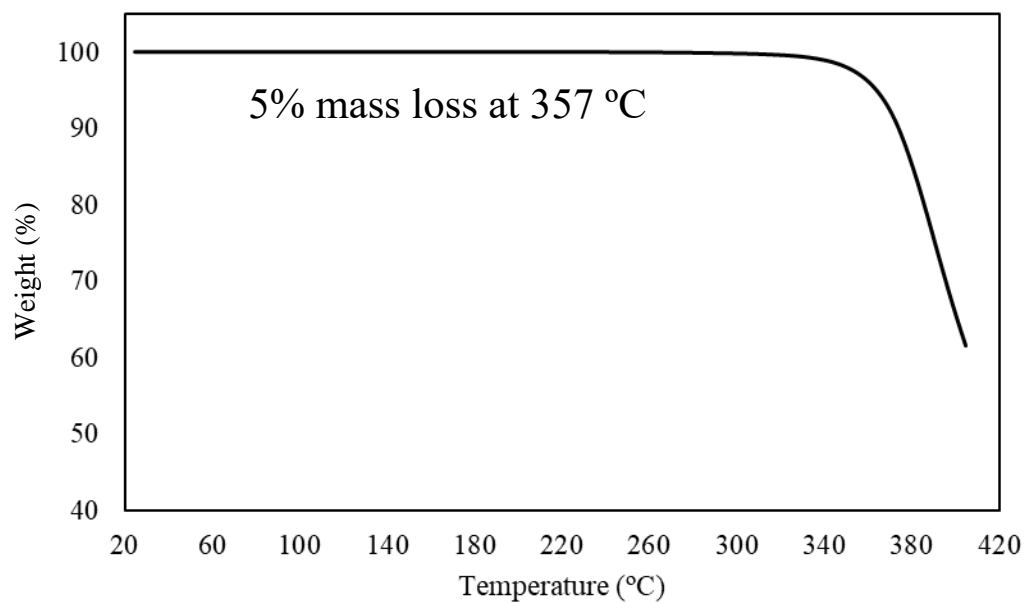

**Fig. S253** TGA curve of PMyr 800 equivalents generated by **6**/[Ph<sub>3</sub>C][B(C<sub>6</sub>F<sub>5</sub>)<sub>4</sub>] from **Table 4**, entry 2 (90 min).

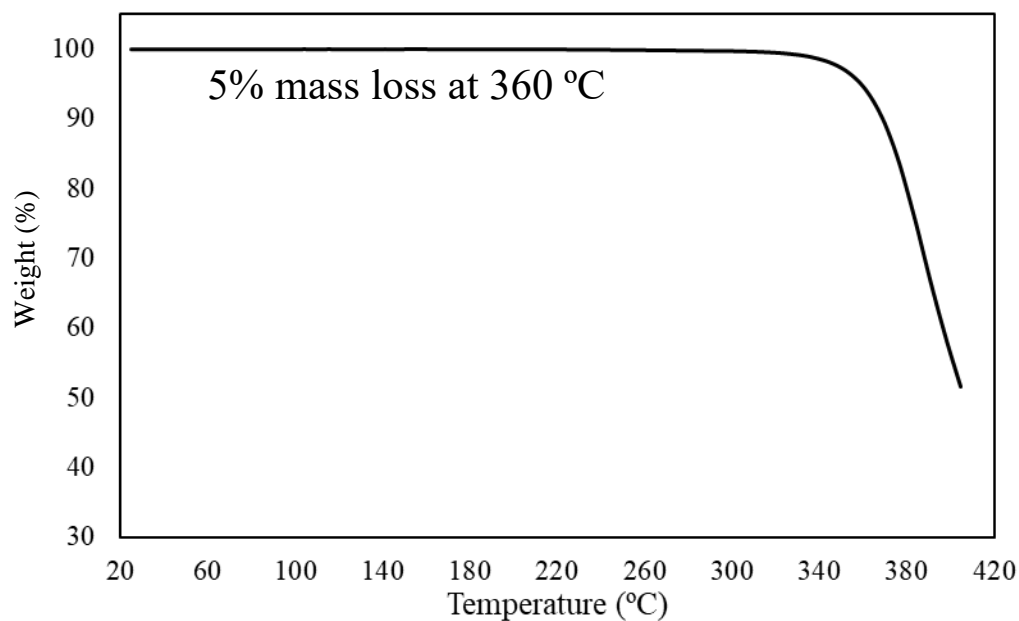

**Fig. S254** TGA curve of PMyr 800 equivalents generated by **6**/[Ph<sub>3</sub>C][B(C<sub>6</sub>F<sub>5</sub>)<sub>4</sub>] from **Table 4**, entry 3 (3 h).

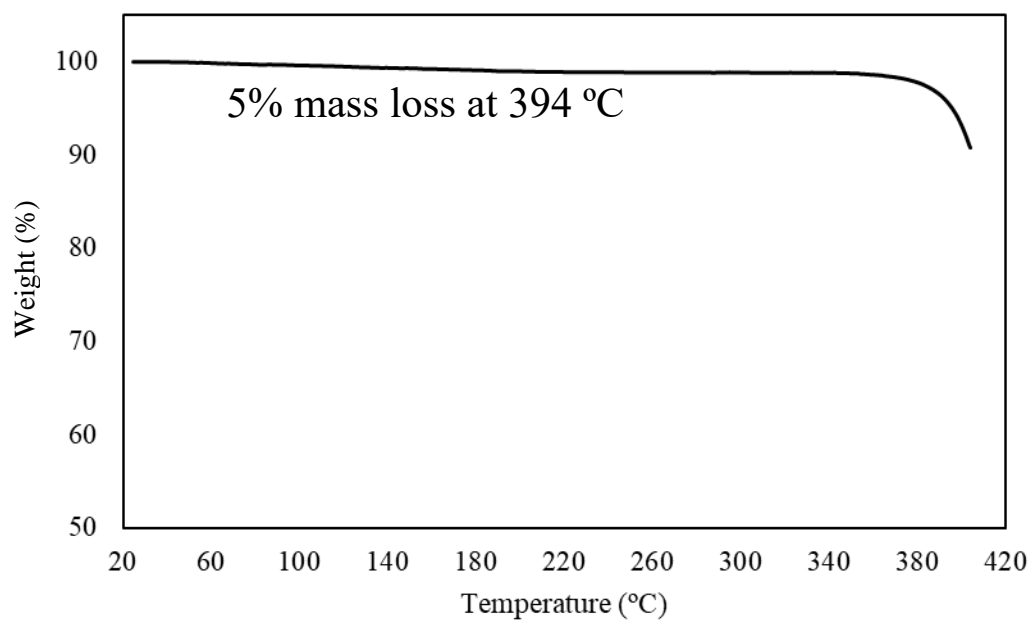

**Fig. S255** TGA curve of PS 800 equivalents generated by **6**/[Ph<sub>3</sub>C][B(C<sub>6</sub>F<sub>5</sub>)<sub>4</sub>] from **Table 4**, entry 4 (30 min).

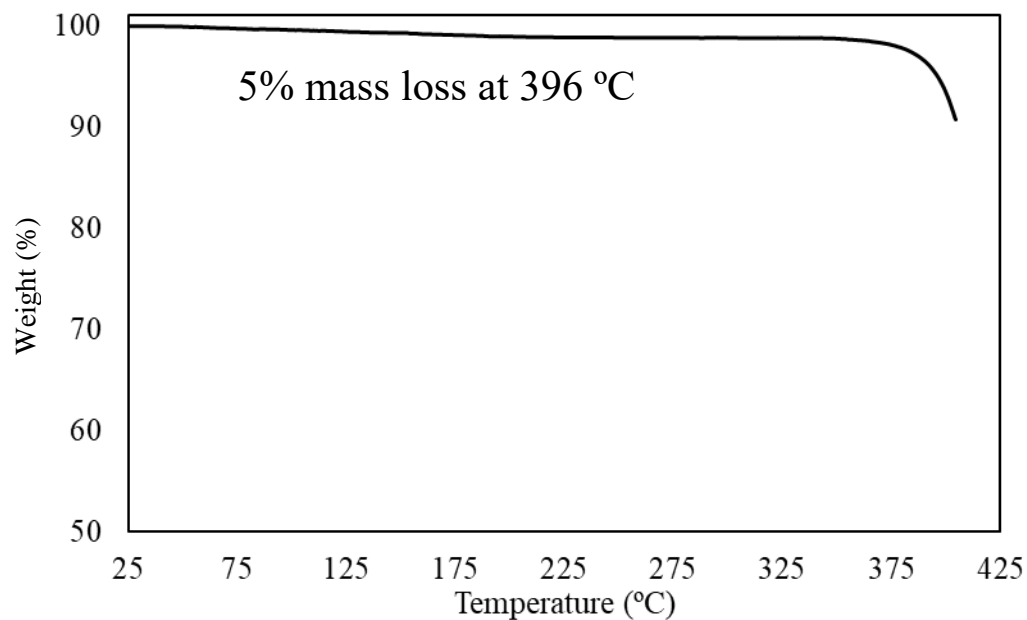

**Fig. S256** TGA curve of PS 800 equivalents generated by **6**/[Ph<sub>3</sub>C][B(C<sub>6</sub>F<sub>5</sub>)<sub>4</sub>] from **Table 4**, entry 5 (20 h).

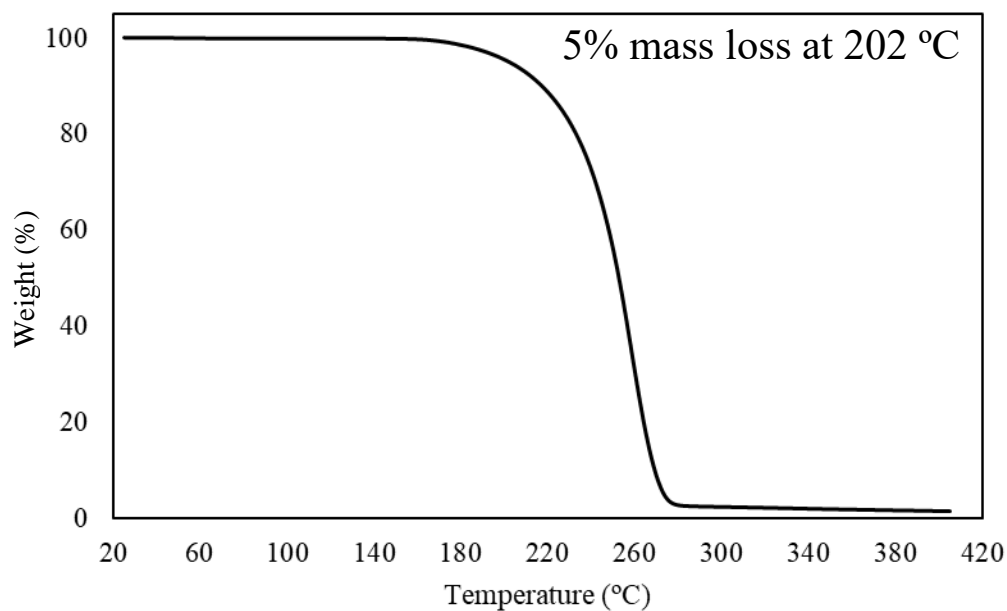

**Fig. S257** TGA curve of PVL 300 equivalents generated by **6**/[Ph<sub>3</sub>C][B(C<sub>6</sub>F<sub>5</sub>)<sub>4</sub>] from **Table 4**, entry 6 (10 min).

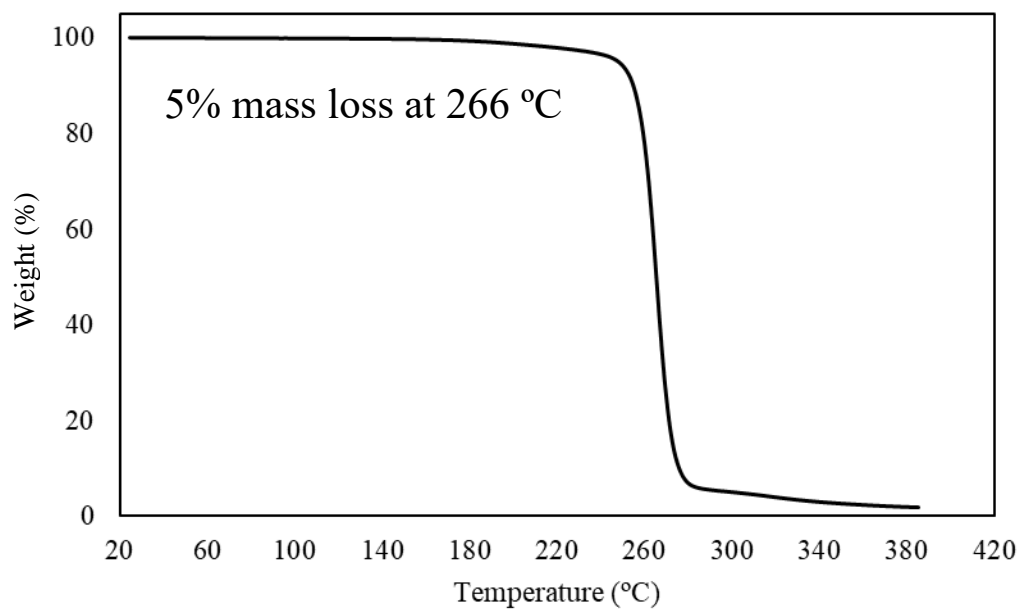

**Fig. S258** TGA curve of PDL 300 equivalents generated by **6**/[Ph<sub>3</sub>C][B(C<sub>6</sub>F<sub>5</sub>)<sub>4</sub>] from **Table 4**, entry 7 (6 h).



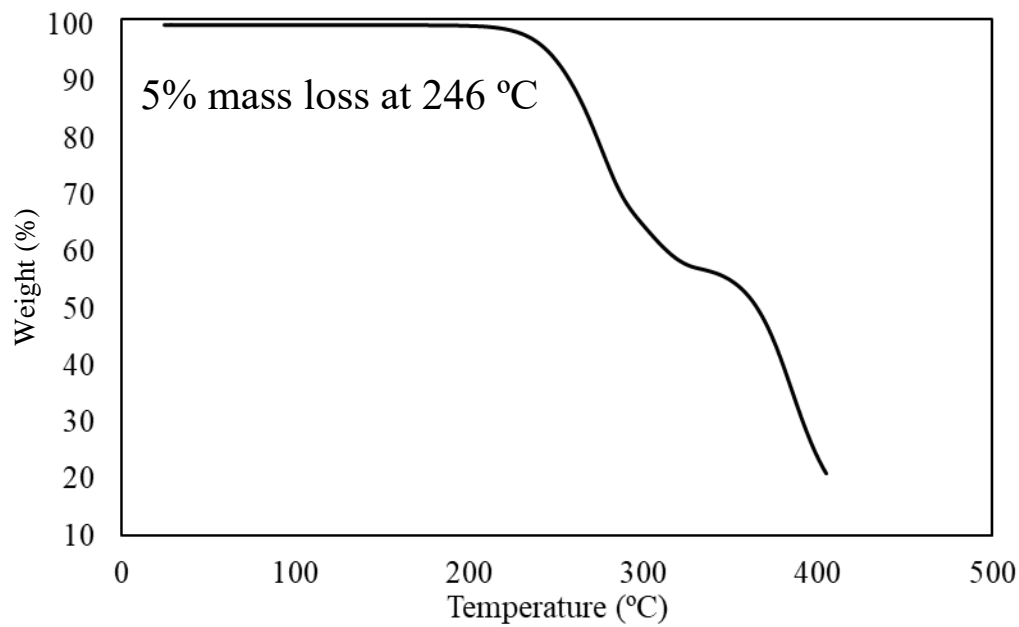

**Fig. S259** TGA curve of PIP-*b*-PVL 800:300 equivalents generated by **6**/[Ph<sub>3</sub>C][B(C<sub>6</sub>F<sub>5</sub>)<sub>4</sub>] from **Table 5**, entry 1.

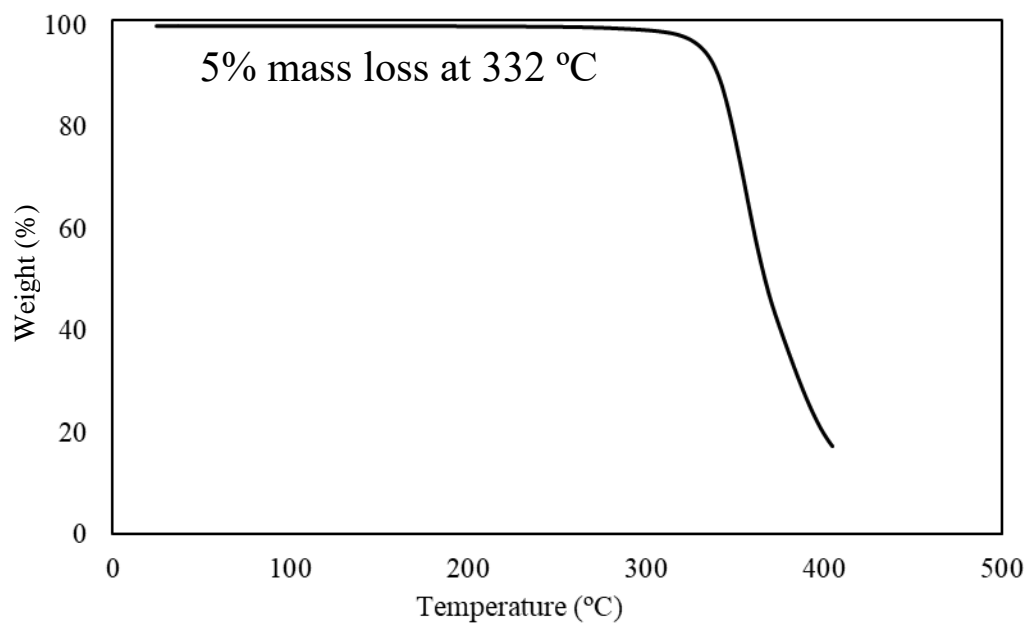

**Fig. S260** TGA curve of PIP-*b*-PDL 800:300 equivalents generated by **6**/[Ph<sub>3</sub>C][B(C<sub>6</sub>F<sub>5</sub>)<sub>4</sub>] from **Table 5**, entry 2.

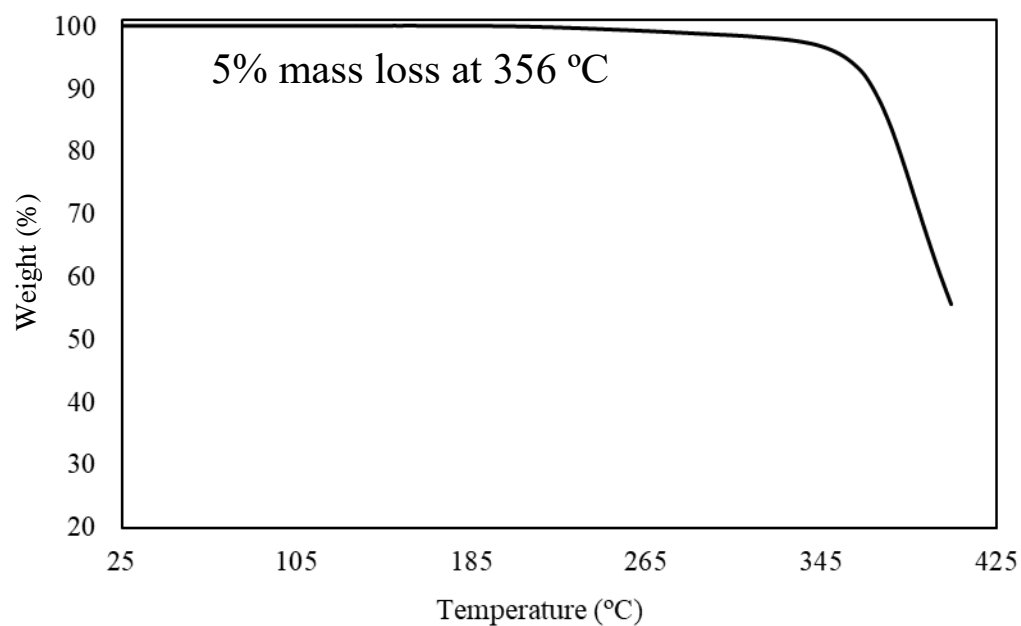

**Fig. S261** TGA curve of PMyr-*b*-PCL 800:300 equivalents generated by **6**/[Ph<sub>3</sub>C][B(C<sub>6</sub>F<sub>5</sub>)<sub>4</sub>] from **Table 5**, entry 3.

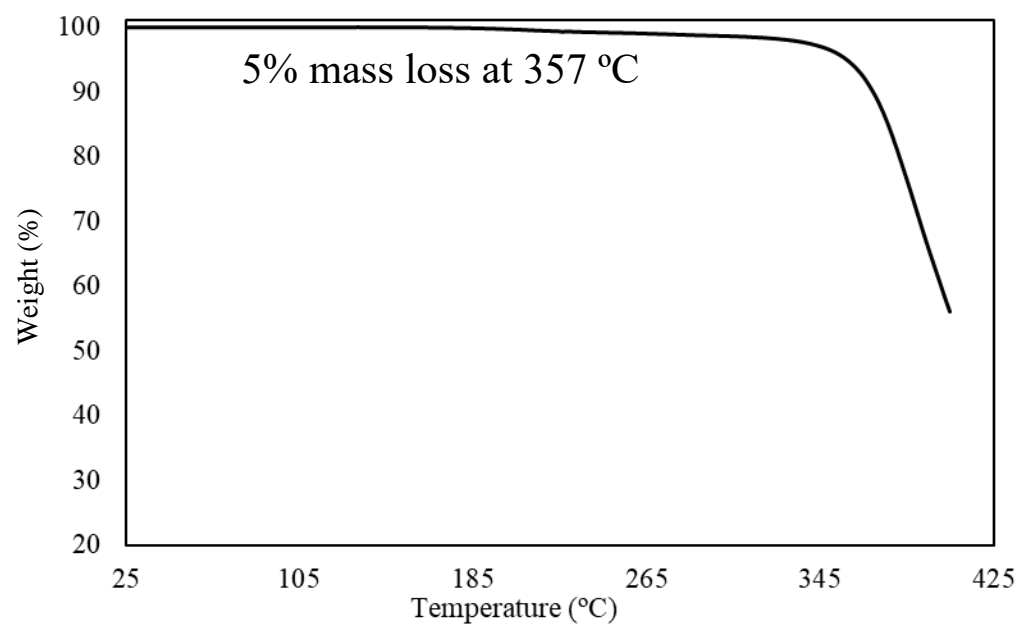

**Fig. S262** DSC curve of PMyr-*b*-PVL 800:300 equivalents generated by **6**/[Ph<sub>3</sub>C][B(C<sub>6</sub>F<sub>5</sub>)<sub>4</sub>] from **Table 5**, entry 4.

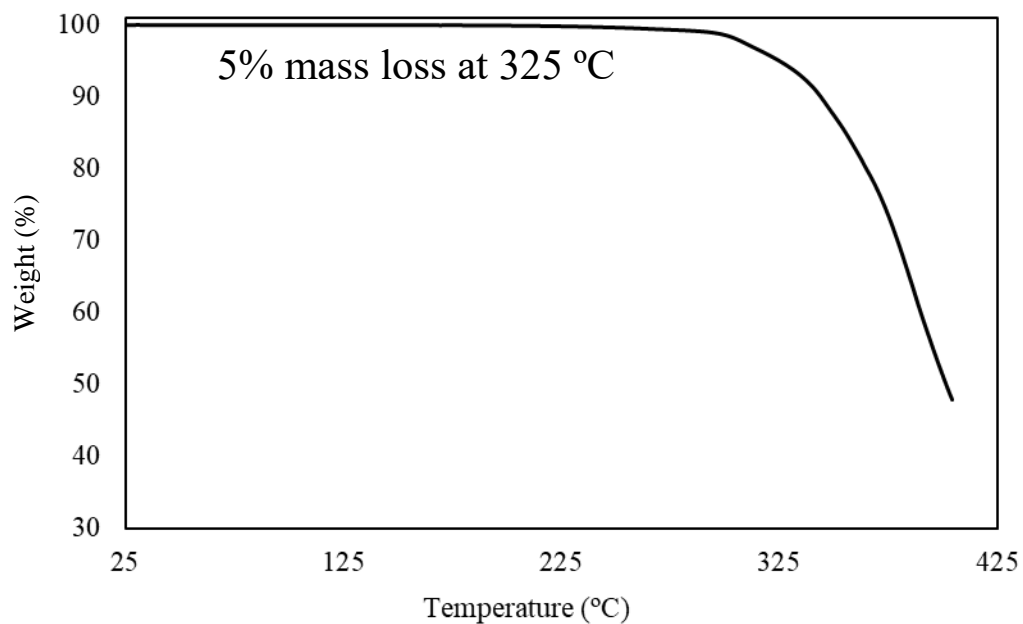

**Fig. S263** TGA curve of PMyr-*b*-PDL 800:300 equivalents generated by **6**/[Ph<sub>3</sub>C][B(C<sub>6</sub>F<sub>5</sub>)<sub>4</sub>] from **Table 5**, entry 5.

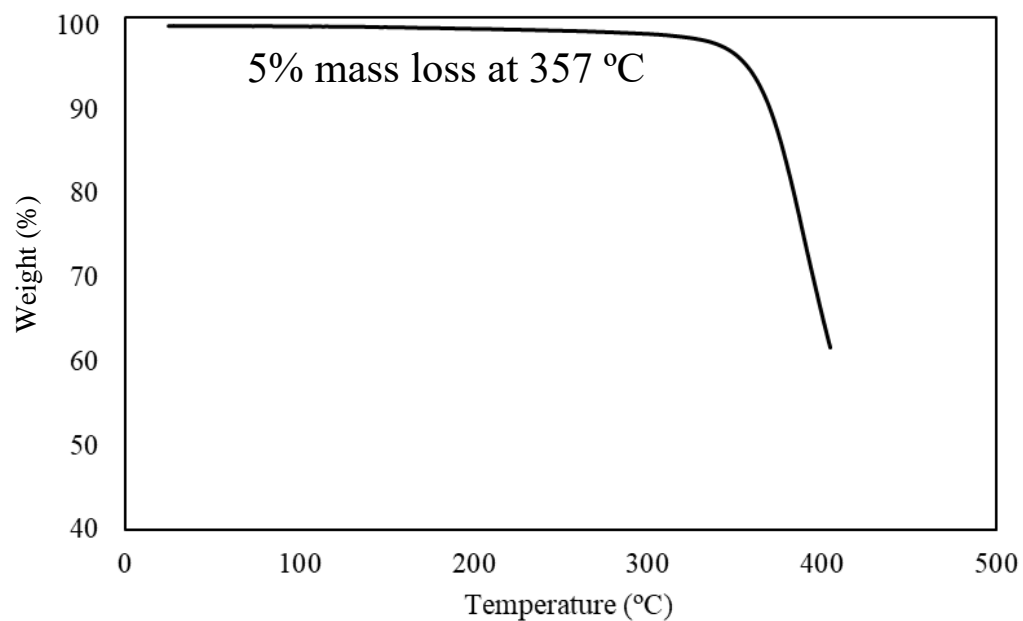

**Fig. S264** TGA curve of PMyr 800 equivalents generated by **8**/[Ph<sub>3</sub>C][B(C<sub>6</sub>F<sub>5</sub>)<sub>4</sub>] from **Table S1**, entry 1 (30 min).

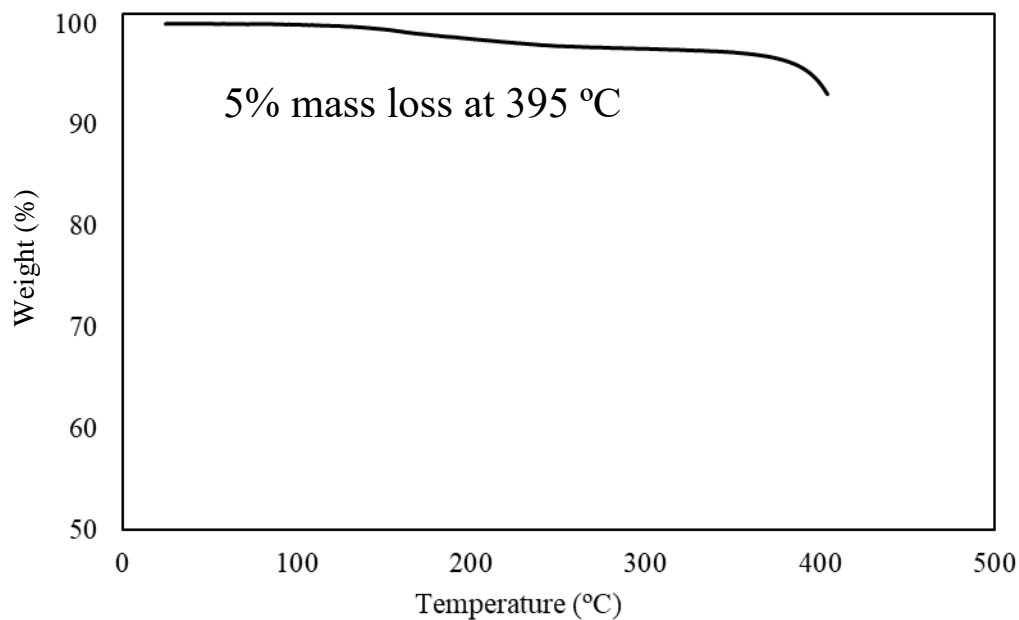

**Fig. S265** TGA curve of PS 800 equivalents generated by **8**/[Ph<sub>3</sub>C][B(C<sub>6</sub>F<sub>5</sub>)<sub>4</sub>] from **Table S1**, entry 2 (30 min).

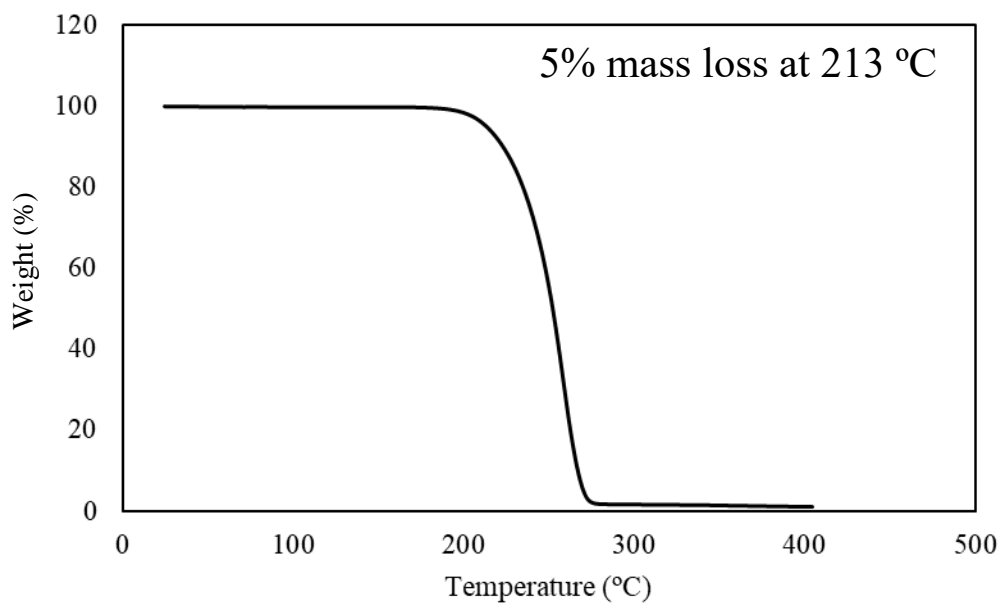

**Fig. S266** TGA curve of PVL 300 equivalents generated by **8**/[Ph<sub>3</sub>C][B(C<sub>6</sub>F<sub>5</sub>)<sub>4</sub>] from **Table S1**, entry 3 (10 min).

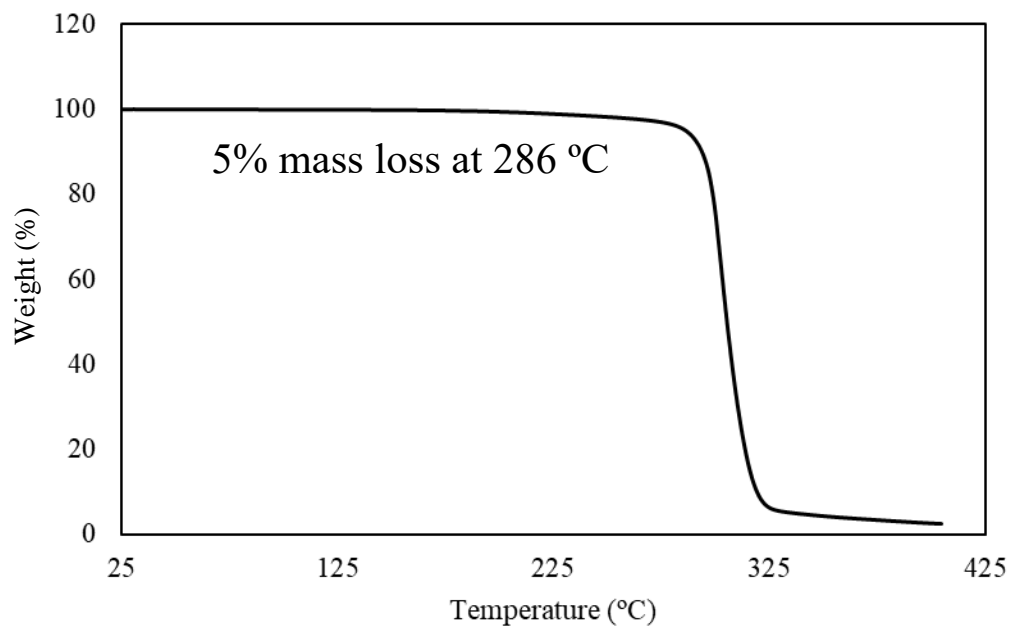

**Fig. S267** TGA curve of PDL 300 equivalents generated by **8**/[Ph<sub>3</sub>C][B(C<sub>6</sub>F<sub>5</sub>)<sub>4</sub>] from **Table S1**, entry 4 (6 h).

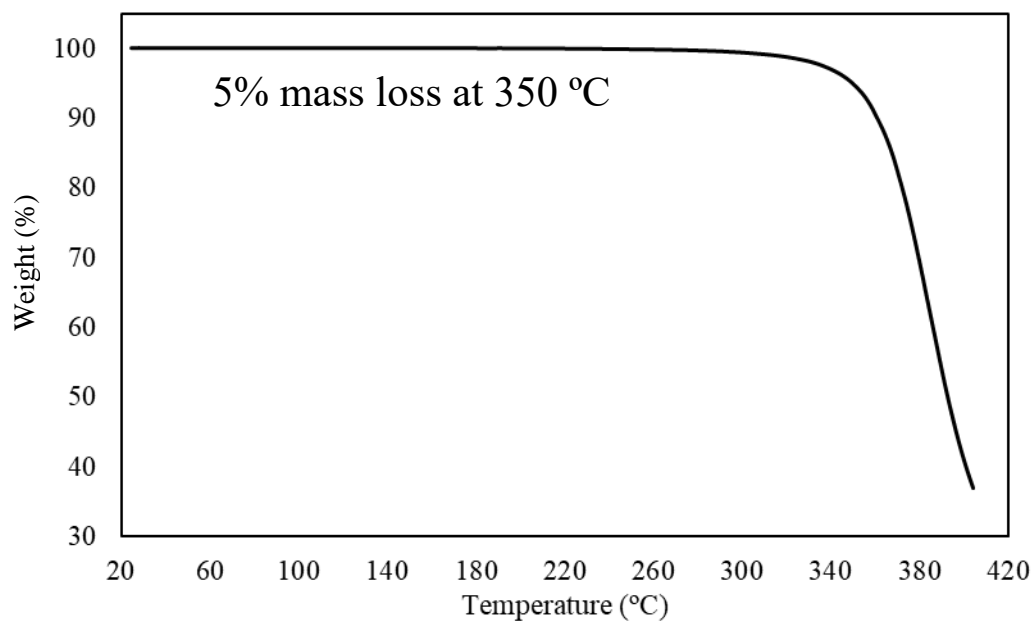

**Fig. S268** TGA curve of PIP 300 equivalents generated by **6**/[Ph<sub>3</sub>C][B(C<sub>6</sub>F<sub>5</sub>)<sub>4</sub>] from **Table S2**, entry 1a (12 h).

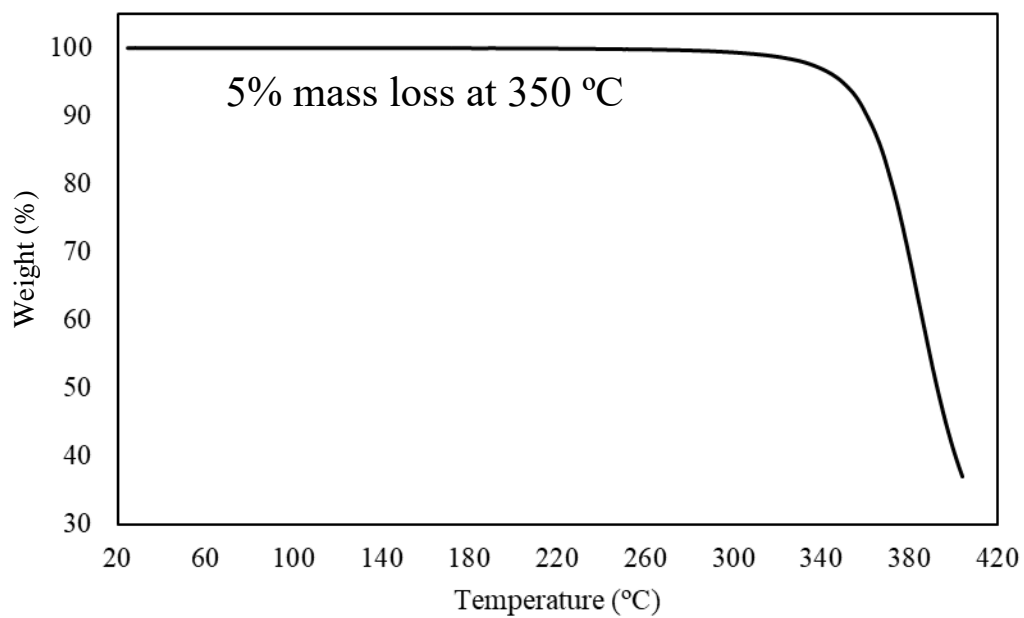

**Fig. S269** TGA curve of PIP 300 equivalents generated by **6**/[Ph<sub>3</sub>C][B(C<sub>6</sub>F<sub>5</sub>)<sub>4</sub>] from **Table S2**, entry 1b (12 h).

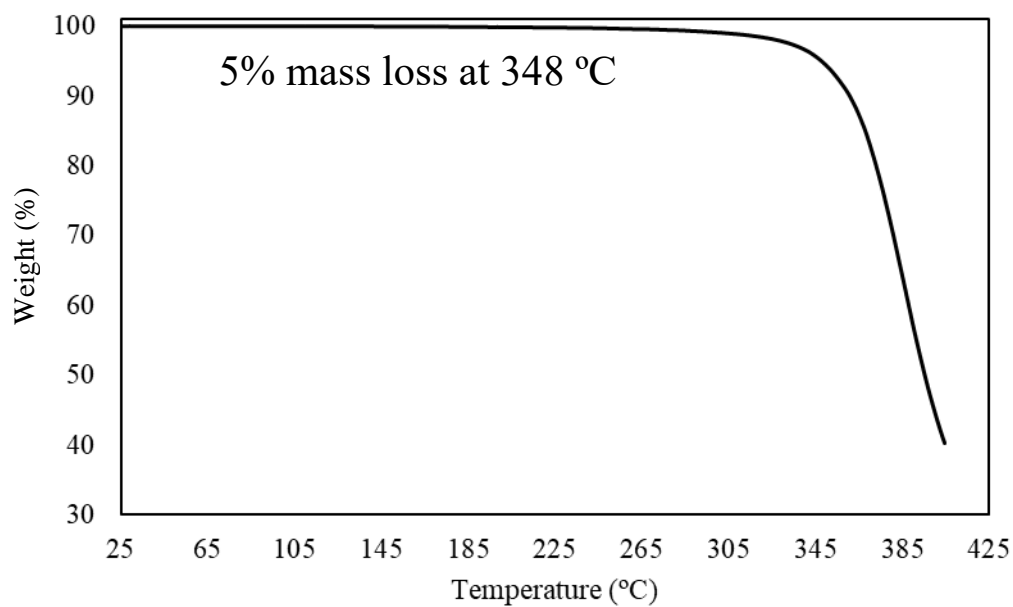

**Fig. S270** TGA curve of PIP 300 equivalents generated by **6**/[Ph<sub>3</sub>C][B(C<sub>6</sub>F<sub>5</sub>)<sub>4</sub>] from **Table S2**, entry 1c (12 h).

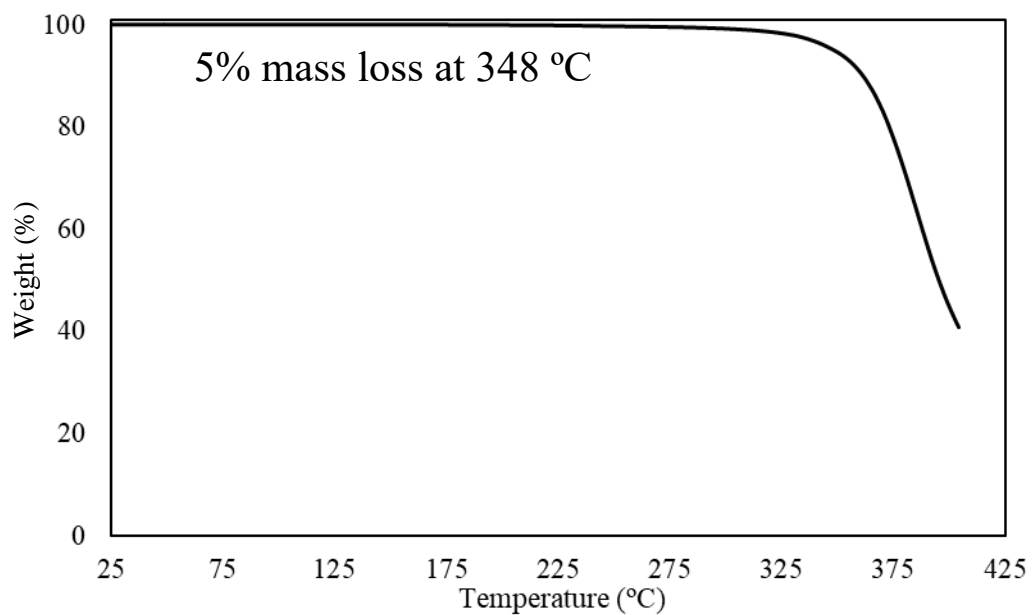

**Fig. S271** TGA curve of PIP 550 equivalents generated by **6**/[Ph<sub>3</sub>C][B(C<sub>6</sub>F<sub>5</sub>)<sub>4</sub>] from **Table S2**, entry 2a (12 h).

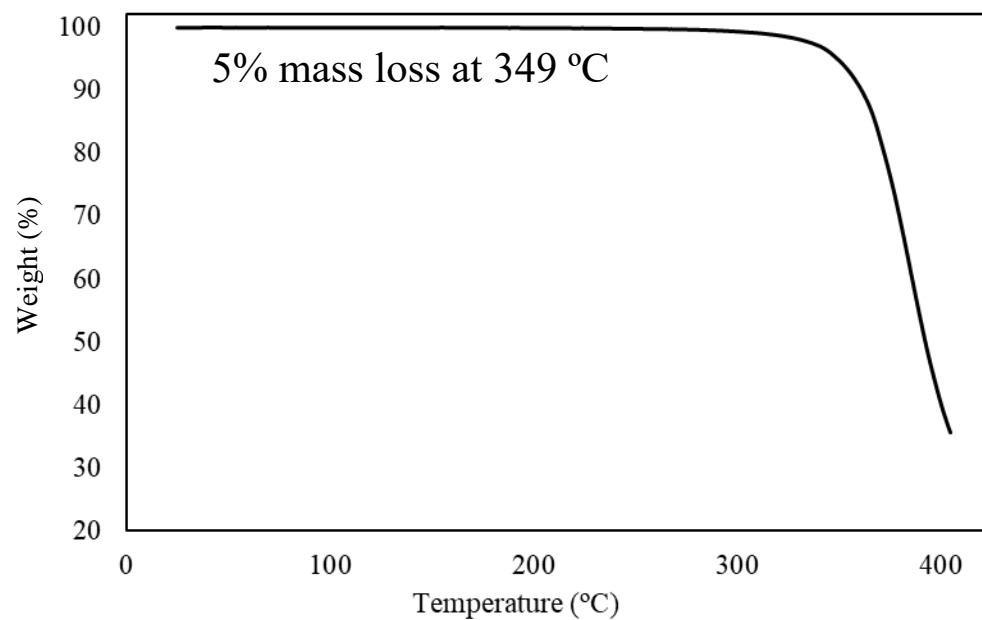

**Fig. S272** TGA curve of PIP 550 equivalents generated by **6**/[Ph<sub>3</sub>C][B(C<sub>6</sub>F<sub>5</sub>)<sub>4</sub>] from **Table S2**, entry 2b (12 h).

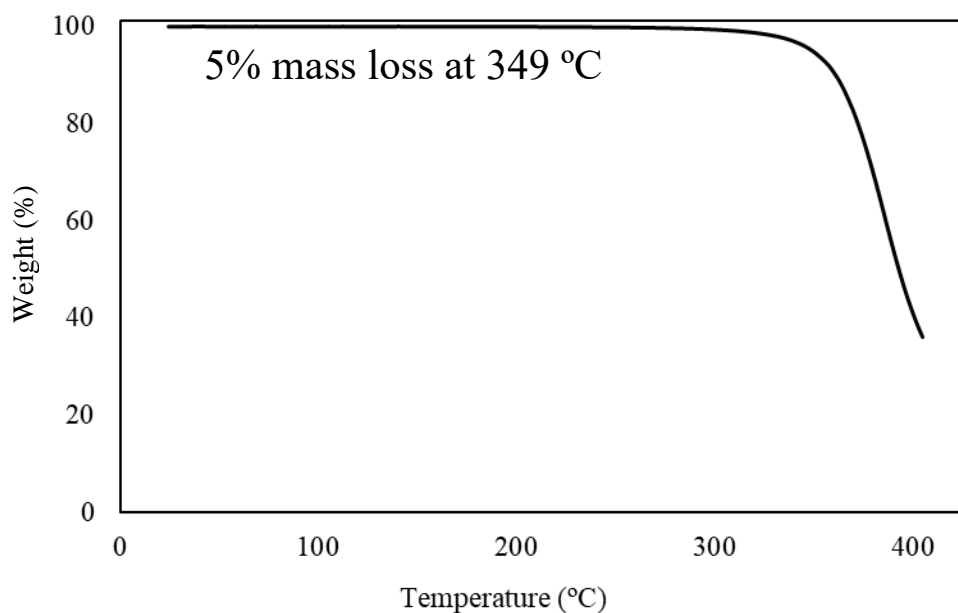

**Fig. S273** TGA curve of PIP 550 equivalents generated by **6**/[Ph<sub>3</sub>C][B(C<sub>6</sub>F<sub>5</sub>)<sub>4</sub>] from **Table S2**, entry 2c (12 h).

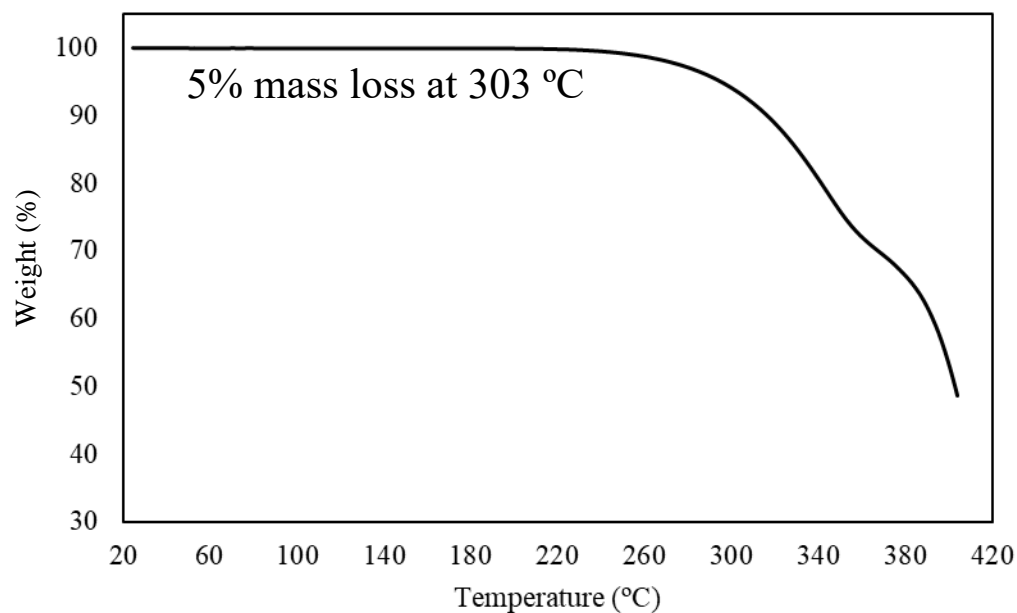

**Fig. S274** TGA curve of PCL 550 equivalents generated by **6**/[Ph<sub>3</sub>C][B(C<sub>6</sub>F<sub>5</sub>)<sub>4</sub>] from **Table S2**, entry 3a (2 h).



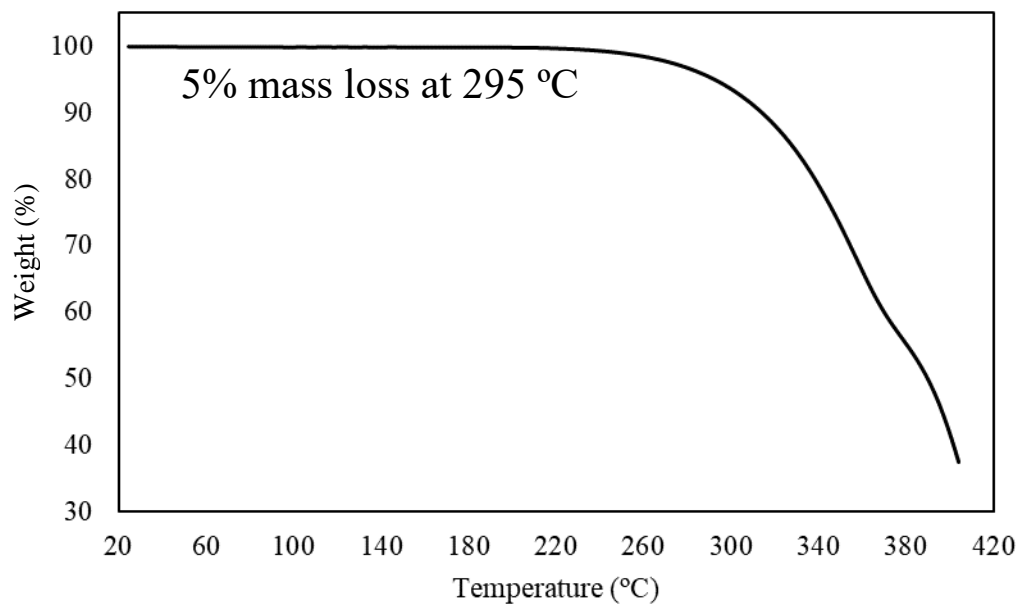

**Fig. S275** TGA curve of PCL 550 equivalents generated by **6**/[Ph<sub>3</sub>C][B(C<sub>6</sub>F<sub>5</sub>)<sub>4</sub>] from **Table S2**, entry 3b (2 h).

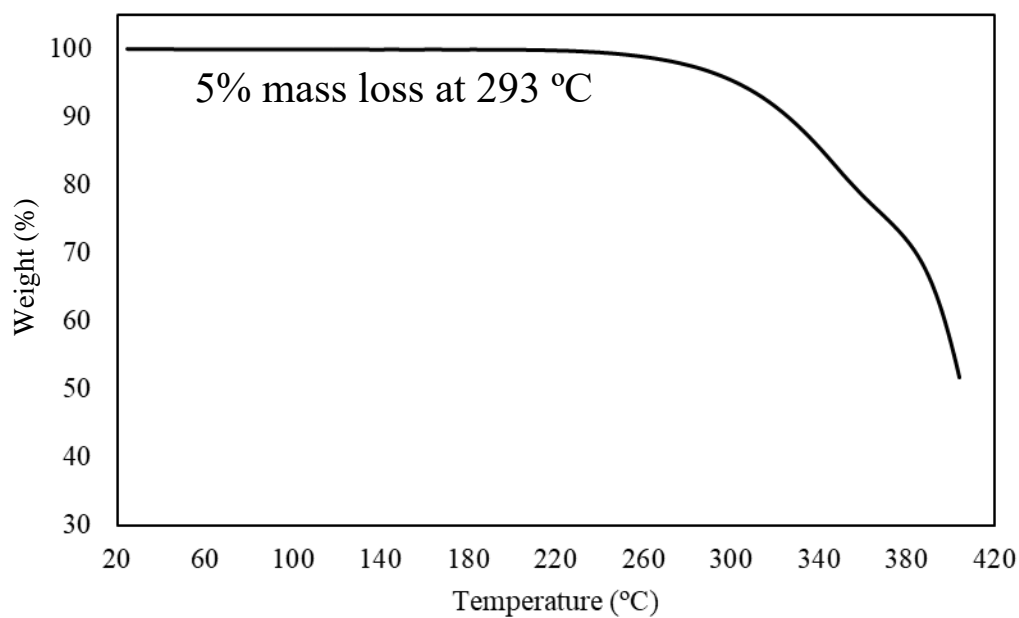

**Fig. S276** TGA curve of PCL 550 equivalents generated by **6**/[Ph<sub>3</sub>C][B(C<sub>6</sub>F<sub>5</sub>)<sub>4</sub>] from **Table S2**, entry 3c (2 h).

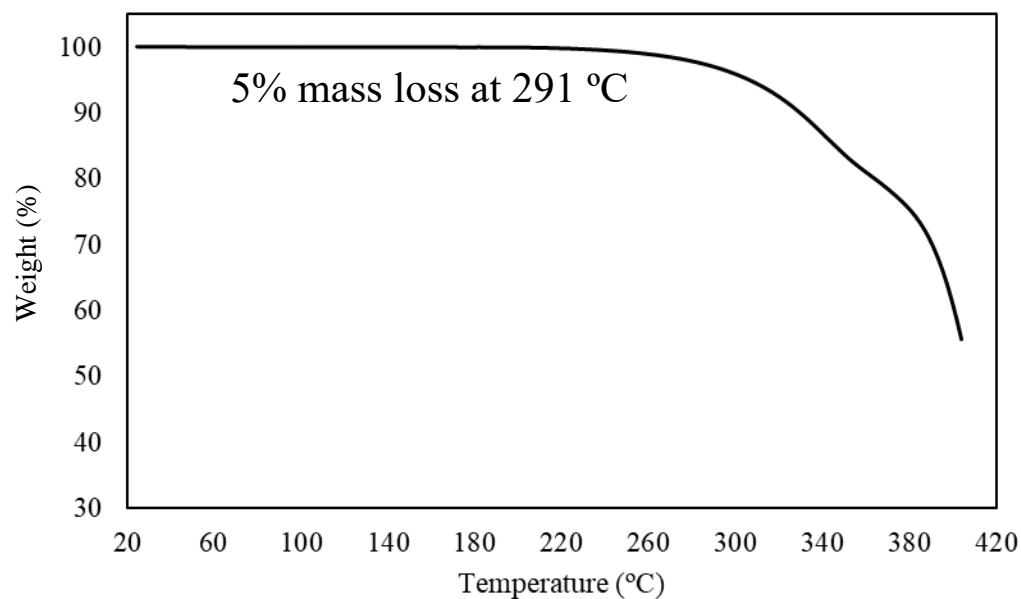

**Fig. S277** TGA curve of PCL 800 equivalents generated by **6**/[Ph<sub>3</sub>C][B(C<sub>6</sub>F<sub>5</sub>)<sub>4</sub>] from **Table S2**, entry 4a (2 h).

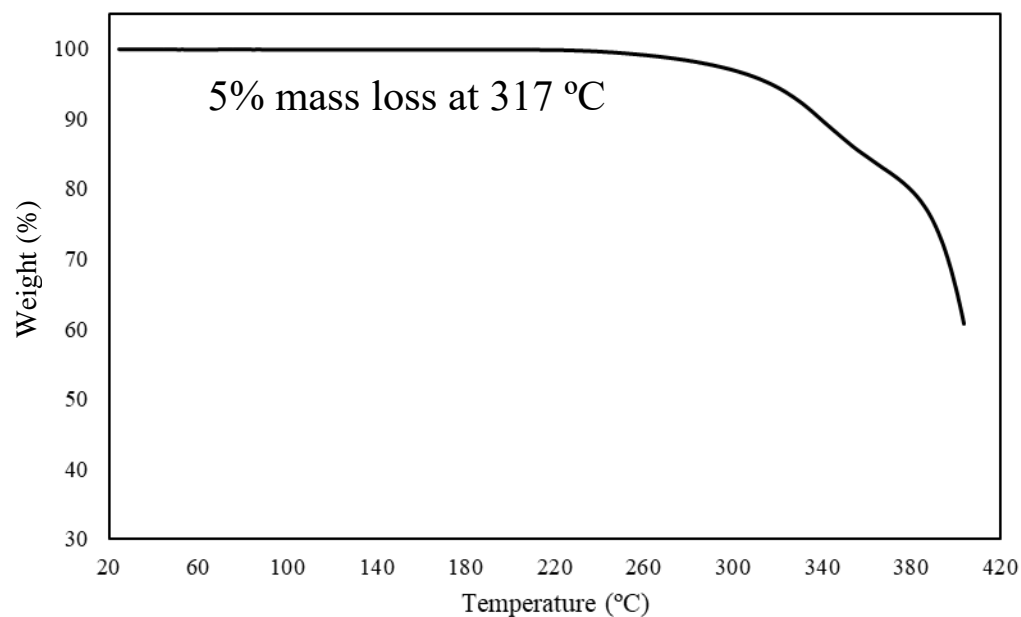

**Fig. S278** TGA curve of PCL 800 equivalents generated by **6**/[Ph<sub>3</sub>C][B(C<sub>6</sub>F<sub>5</sub>)<sub>4</sub>] from **Table S2**, entry 4b (2 h).

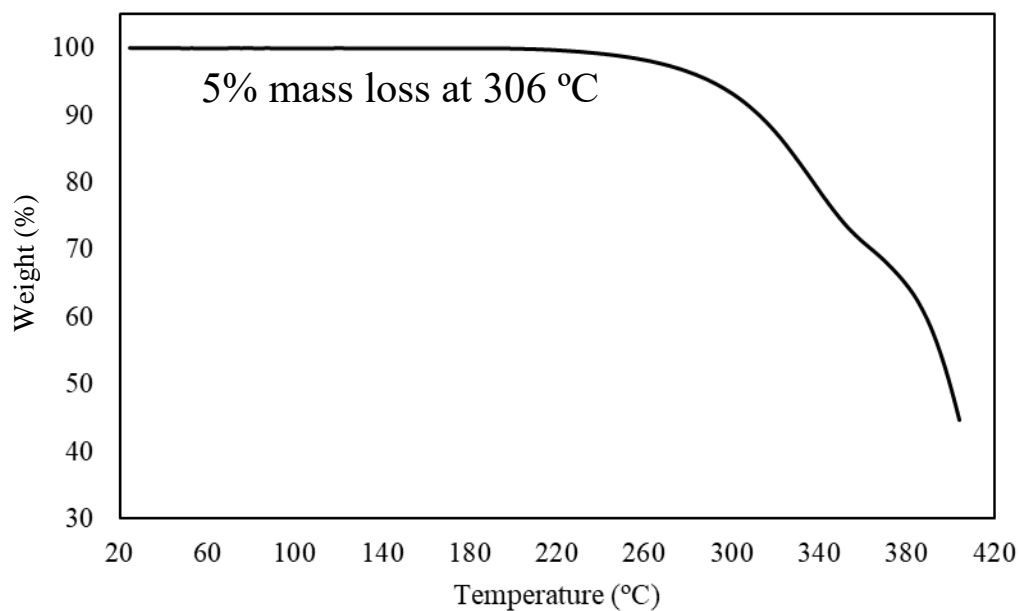

**Fig. S279** TGA curve of PCL 800 equivalents generated by **6**/[Ph<sub>3</sub>C][B(C<sub>6</sub>F<sub>5</sub>)<sub>4</sub>] from **Table S2**, entry 4c (2 h).

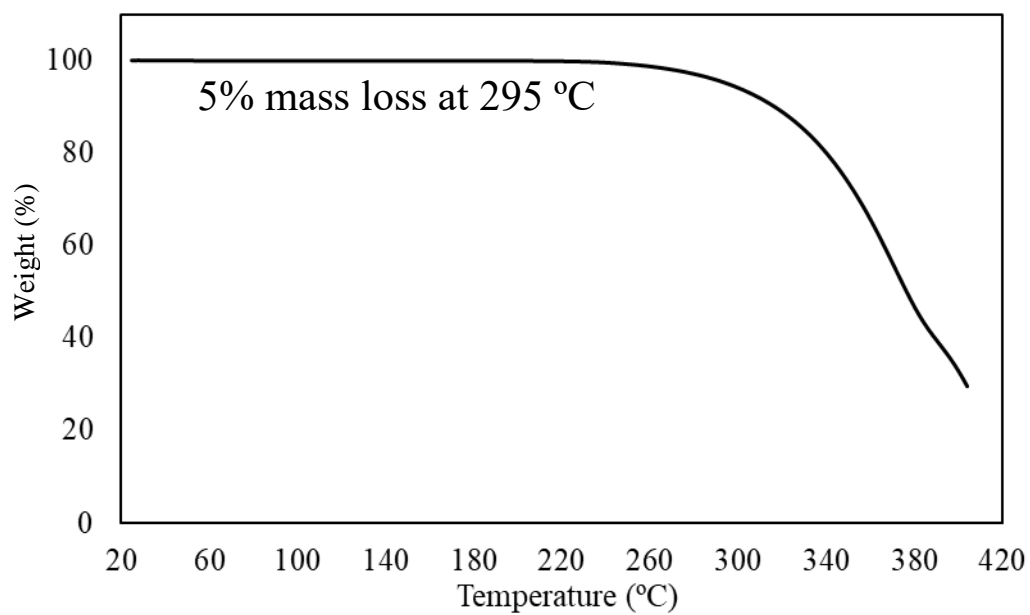

**Fig. S280** TGA curve of PCL 300 equivalents generated by **6** from **Table S2**, entry 5 (No [Ph<sub>3</sub>C][B(C<sub>6</sub>F<sub>5</sub>)<sub>4</sub>] added) (10 min).

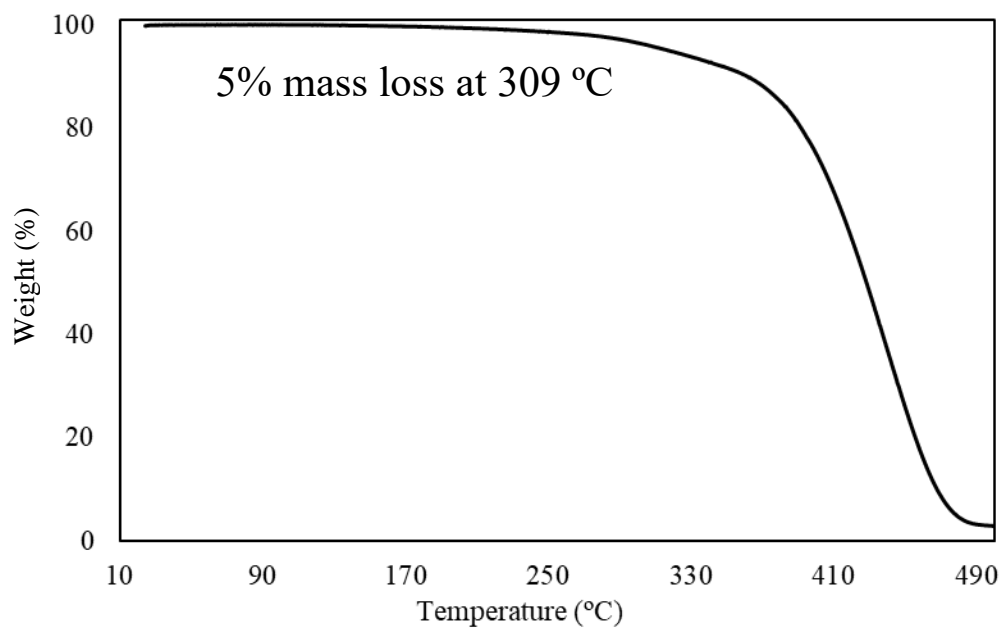

**Fig. S281** TGA curve of PIP 50 equivalents generated by **6**/[Ph<sub>3</sub>C][B(C<sub>6</sub>F<sub>5</sub>)<sub>4</sub>] from **Table S3**, entry 1 (12 h).

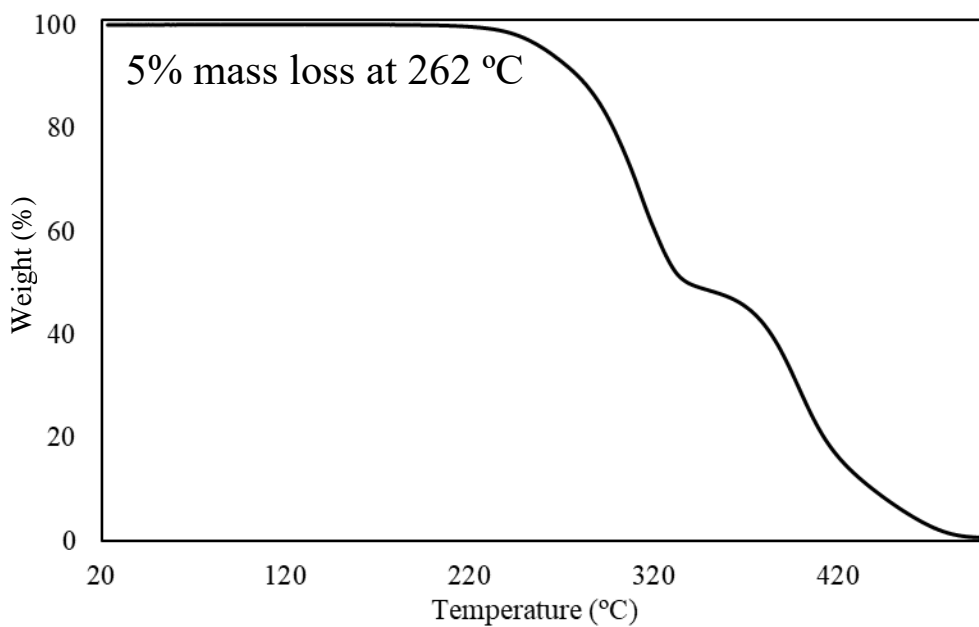

**Fig. S282** TGA curve of PIP-*b*-PCL 50:50 equivalents generated by **6**/[Ph<sub>3</sub>C][B(C<sub>6</sub>F<sub>5</sub>)<sub>4</sub>] from **Table S3**, entry 2.

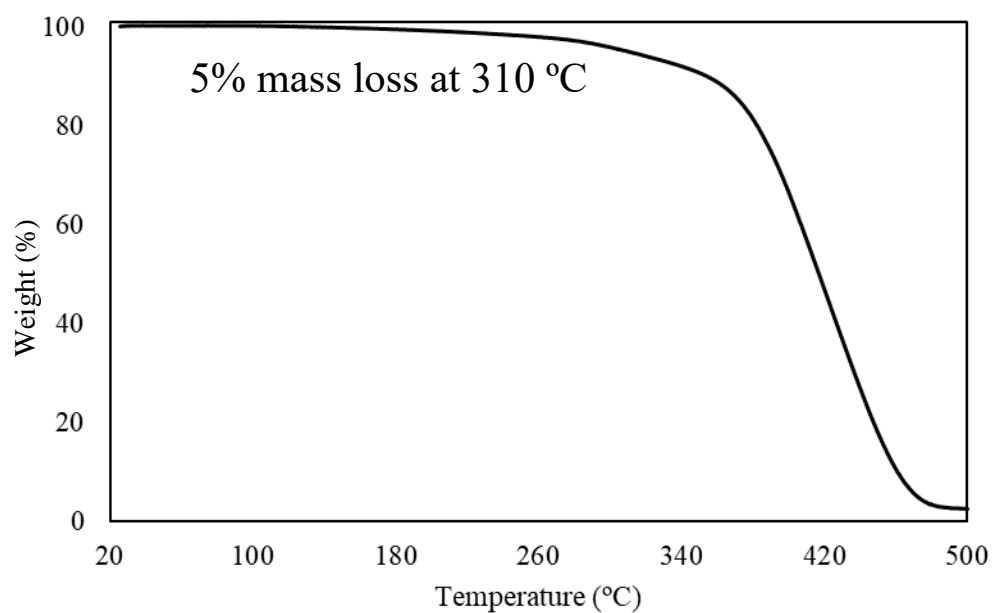

**Fig. S283** TGA curve of recovered PIP 50 equivalents after hydrolysis of PIP-*b*-PCL 50:50 from **Table S3**, entry 3 (12 h).

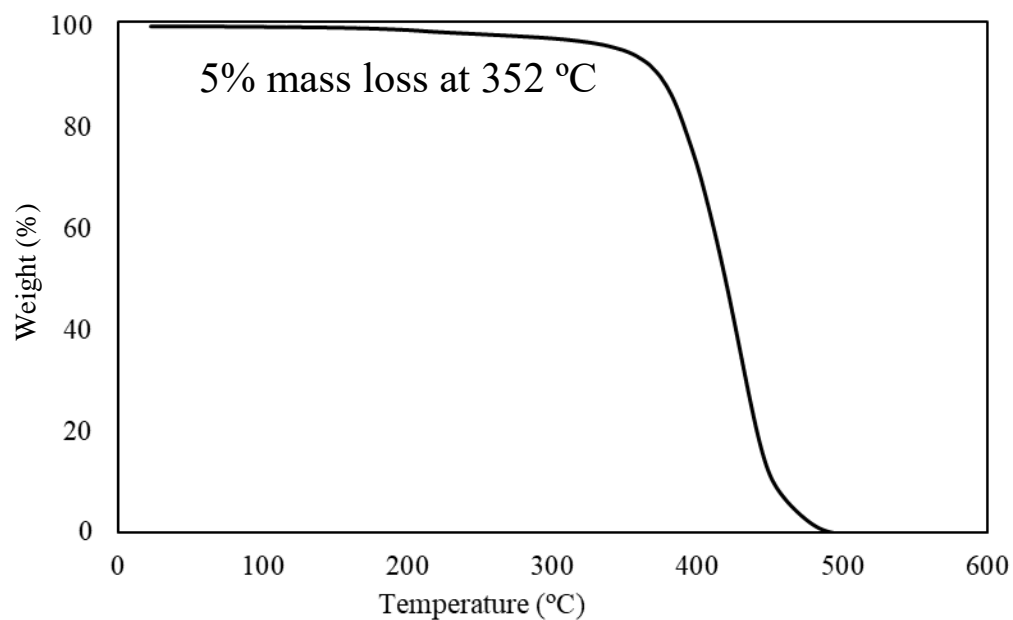

**Fig. S284** TGA curve of PIP-*b*-PCL 50:50 equivalents generated by  $\text{Y}[\text{N}(\text{SiMe}_3)_2]_3$  from **Table S3**, entry 4 (6 h).

## 7.0 Differential Scanning Calorimetry (DSC) Characterization of Isolated Polymers

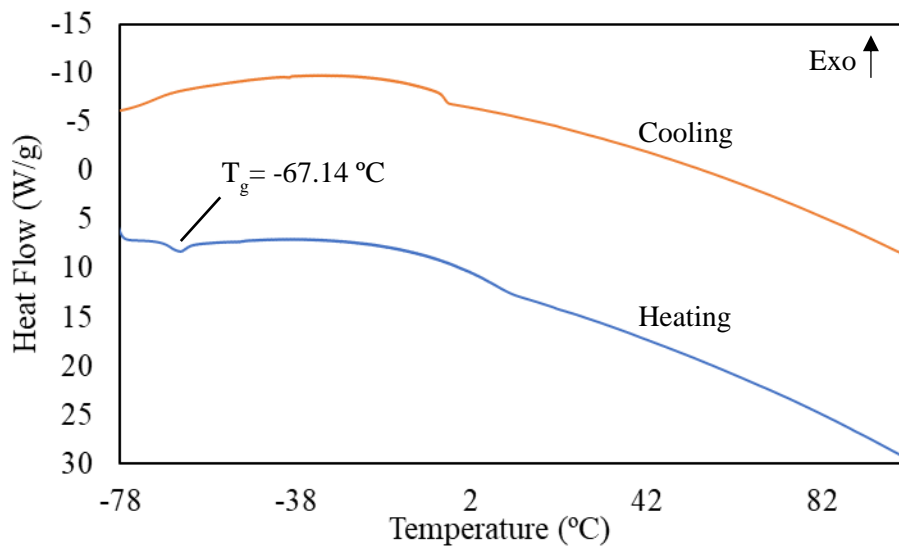

**Fig. S285** DSC curve of PIP generated by **6**/[Ph<sub>3</sub>C][B(C<sub>6</sub>F<sub>5</sub>)<sub>4</sub>] from **Table 1**, entry 1 (12 h).

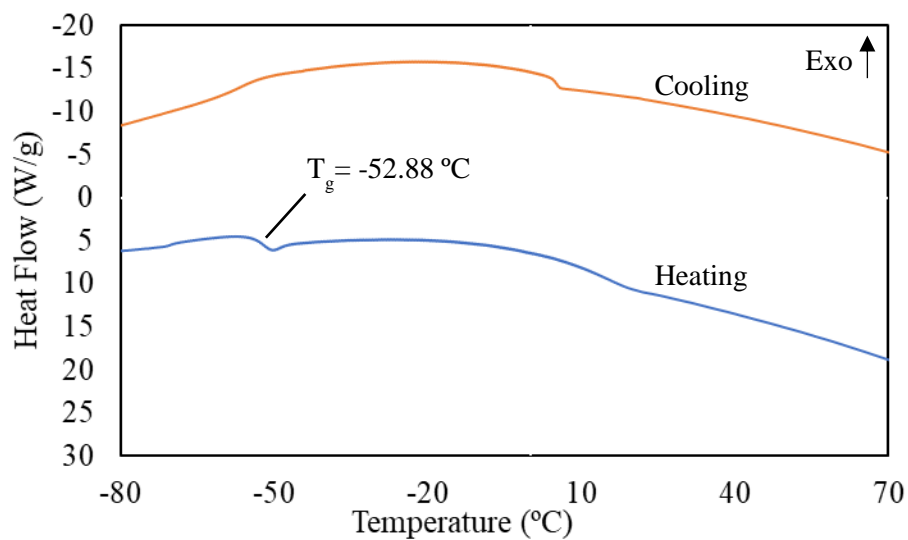

**Fig. S286** DSC curve of PIP 800 equivalents generated by **8**/[Ph<sub>3</sub>C][B(C<sub>6</sub>F<sub>5</sub>)<sub>4</sub>] from **Table 1**, entry 3 (12 h).

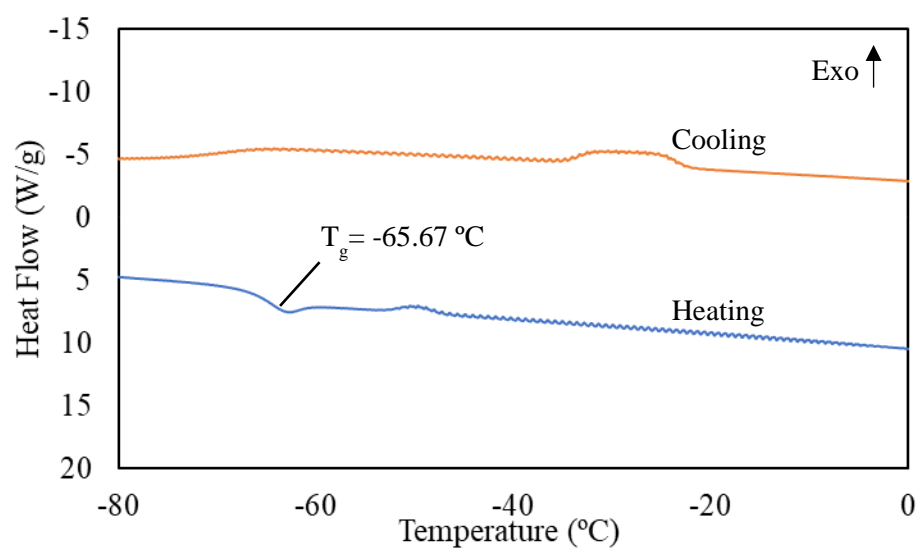

**Fig. S287** DSC curve of PIP 800 equivalents generated by **6**/[Ph<sub>3</sub>C][B(C<sub>6</sub>F<sub>5</sub>)<sub>4</sub>] from Table 1, entry 4 (24 h).

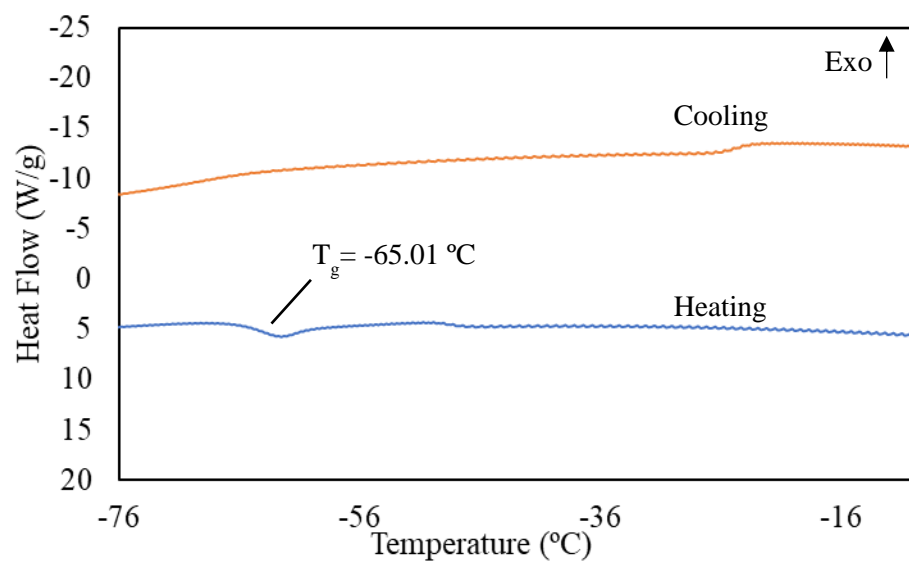

**Fig. S288** DSC curve of PIP 800 equivalents generated by **6**/[Ph<sub>3</sub>C][B(C<sub>6</sub>F<sub>5</sub>)<sub>4</sub>] from Table 1, entry 5 (30 min).

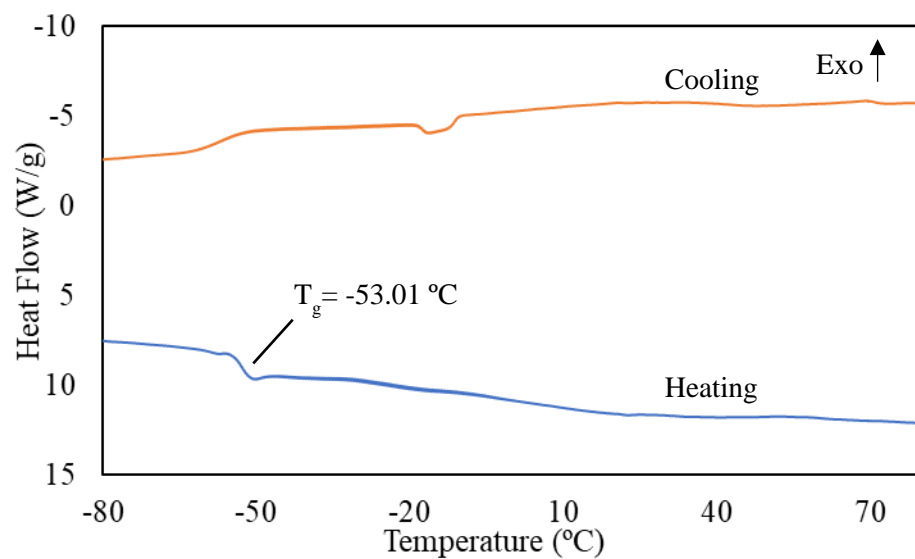

**Fig. S289** DSC curve of PIP 800 equivalents generated by **8**/[Ph<sub>3</sub>C][B(C<sub>6</sub>F<sub>5</sub>)<sub>4</sub>] from **Table 1**, entry 6 (30 min).

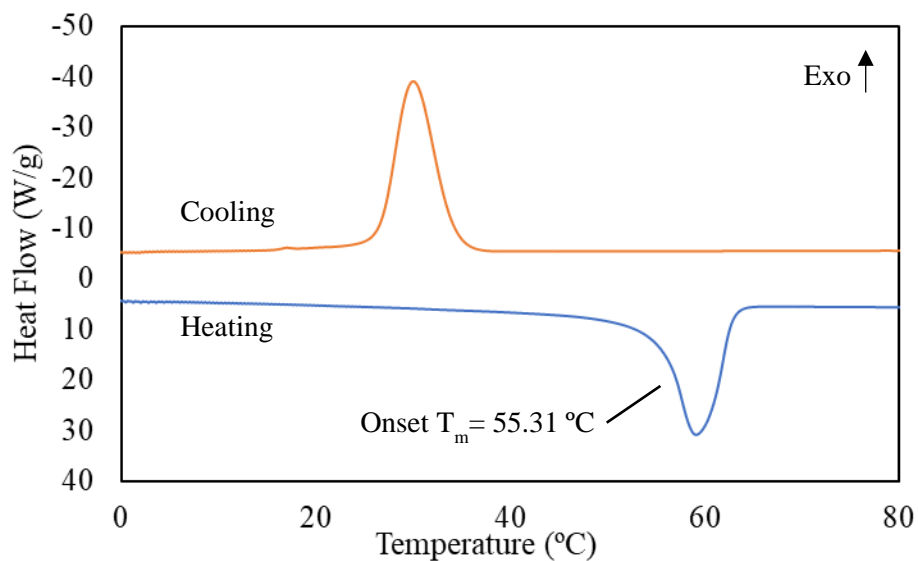

**Fig. S290** DSC curve of PCL 300 equivalents generated by **6**/[Ph<sub>3</sub>C][B(C<sub>6</sub>F<sub>5</sub>)<sub>4</sub>] from **Table 1**, entry 7 (10 min).



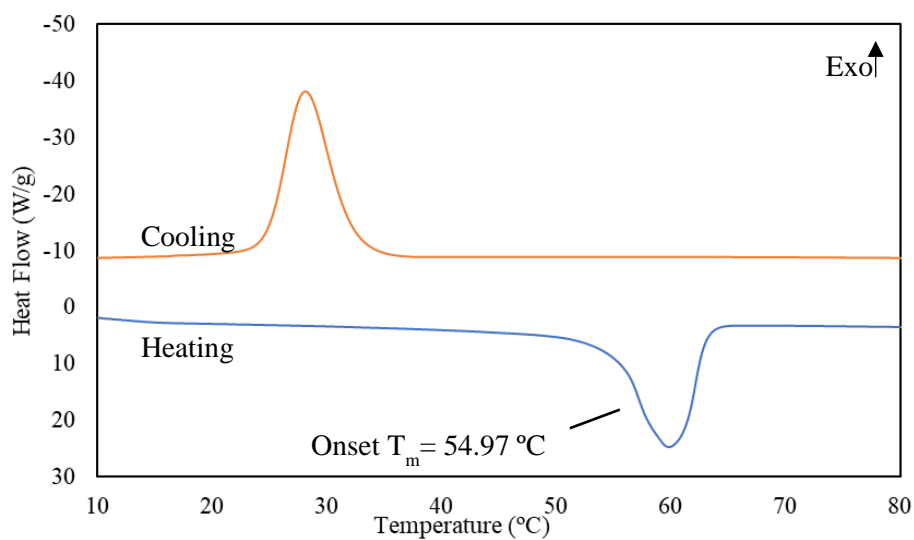

**Fig. S291** DSC curve of PCL 300 equivalents generated by **8**/[Ph<sub>3</sub>C][B(C<sub>6</sub>F<sub>5</sub>)<sub>4</sub>] from **Table 1**, entry 8 (10 min).

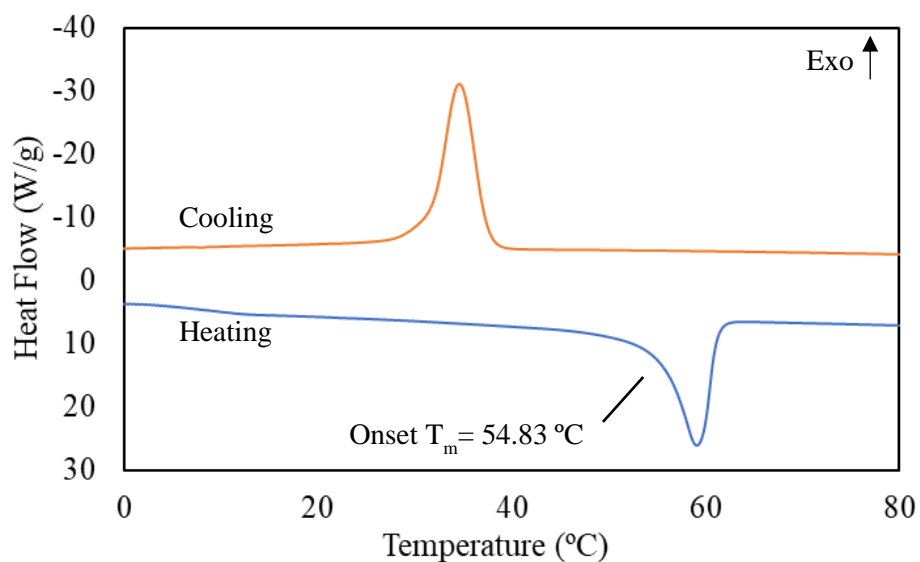

**Fig. S292** DSC curve of PCL 300 equivalents generated by **6**/[Ph<sub>3</sub>C][B(C<sub>6</sub>F<sub>5</sub>)<sub>4</sub>] from **Table 1**, entry 9 (2 h).

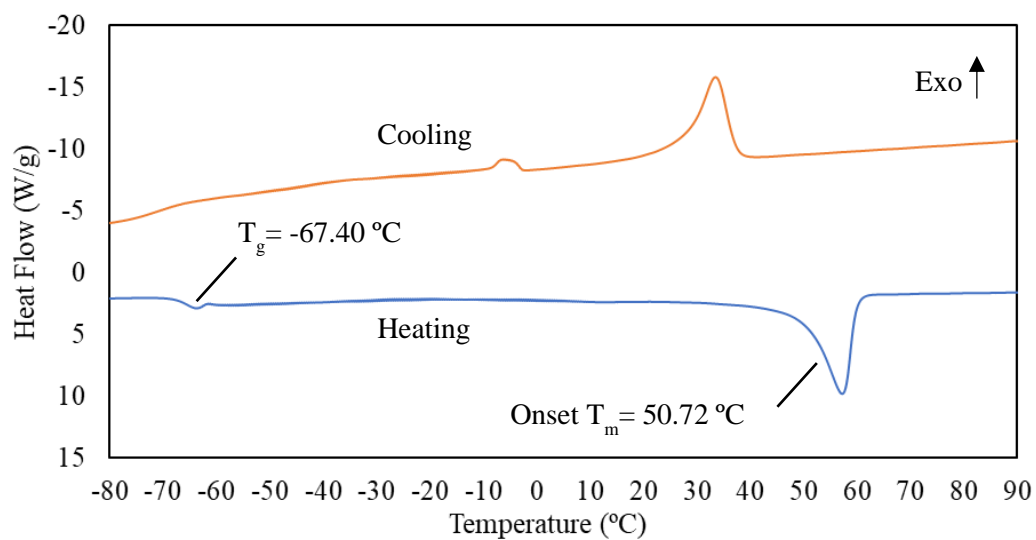

**Fig. S293** DSC curve of PIP-*b*-PCL 800:300 equivalents generated by **6**/[Ph<sub>3</sub>C][B(C<sub>6</sub>F<sub>5</sub>)<sub>4</sub>] from **Table 2**, entry 1.

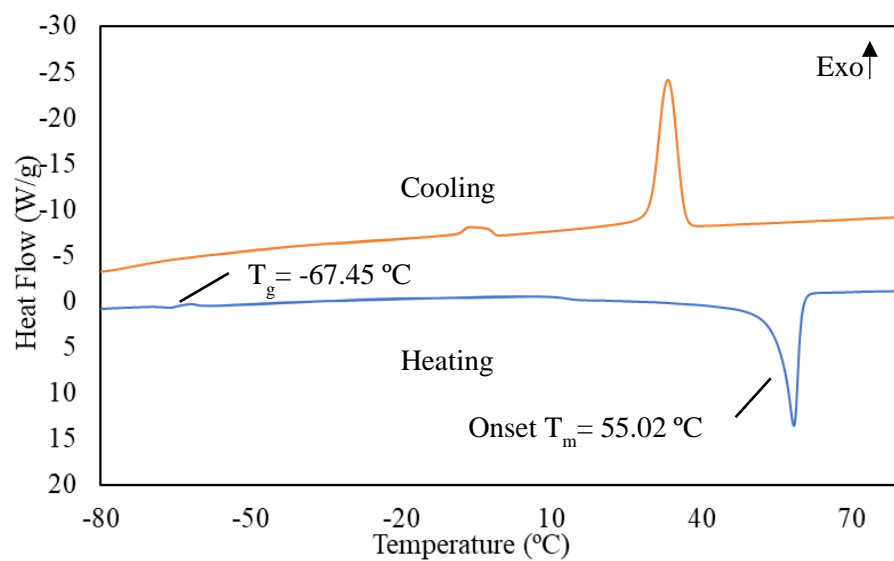

**Fig. S294** DSC curve of PIP-*b*-PCL 550:550 equivalents generated by **6**/[Ph<sub>3</sub>C][B(C<sub>6</sub>F<sub>5</sub>)<sub>4</sub>] from **Table 2**, entry 2.

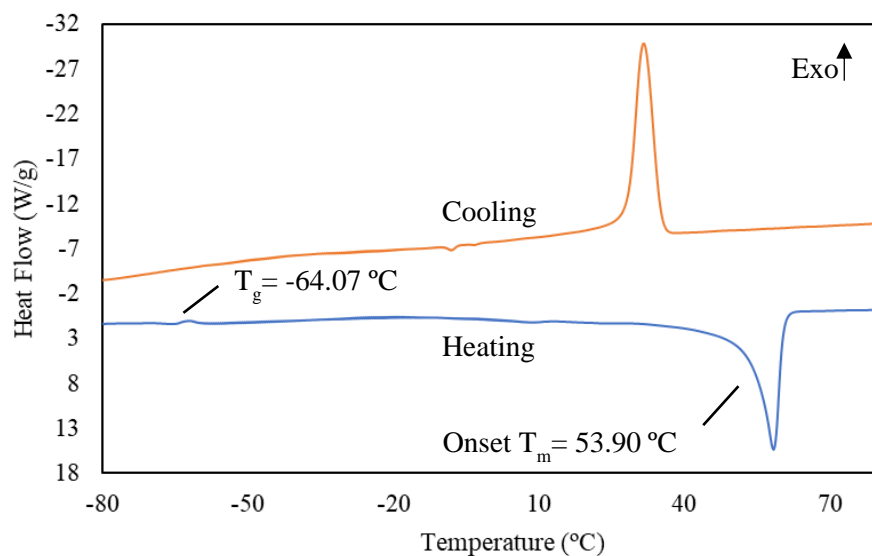

**Fig. S295** DSC curve of PIP-*b*-PCL 300:800 equivalents generated by **6**/[Ph<sub>3</sub>C][B(C<sub>6</sub>F<sub>5</sub>)<sub>4</sub>] from **Table 2**, entry 3.

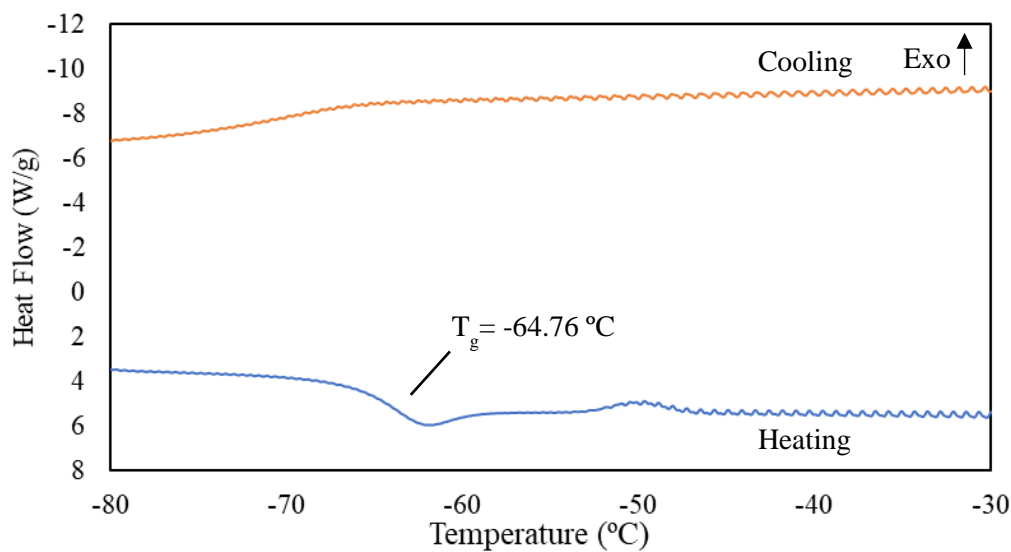

**Fig. S296** DSC curve of PIP 800 equivalents generated by **6**/[Ph<sub>3</sub>C][B(C<sub>6</sub>F<sub>5</sub>)<sub>4</sub>] from **Table 3**, entry 1 (IP addition time 0 min).

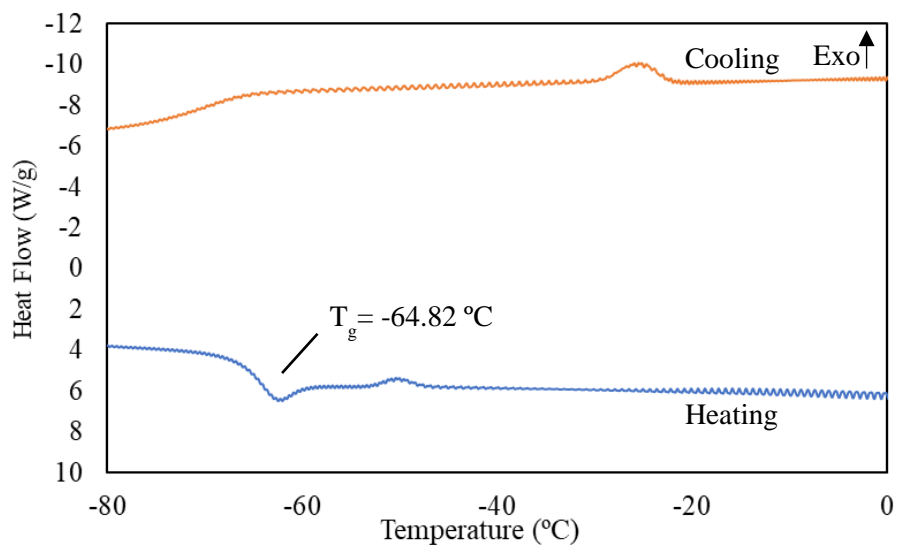

**Fig. S297** DSC curve of PIP 800 equivalents generated by **6**/[Ph<sub>3</sub>C][B(C<sub>6</sub>F<sub>5</sub>)<sub>4</sub>] from **Table 3**, entry 2 (IP addition time 30 min).

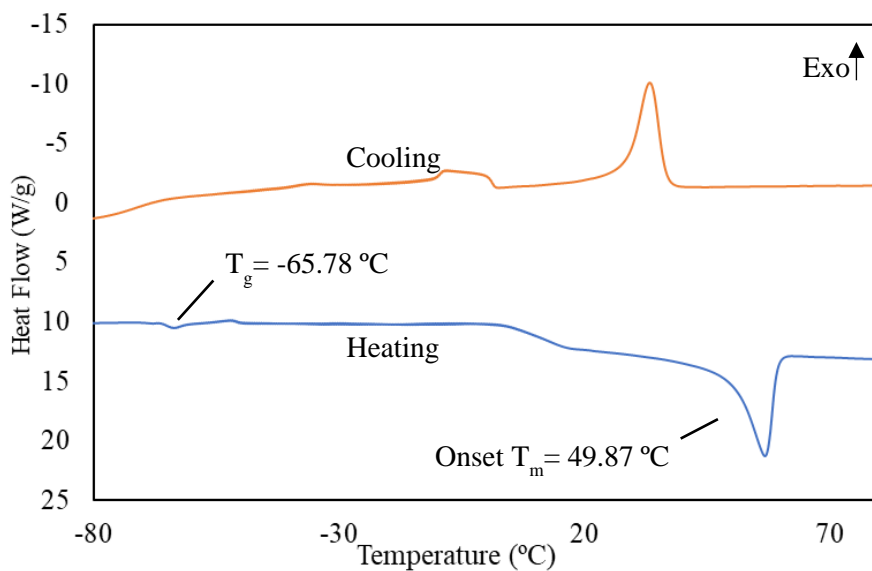

**Fig. S298** DSC curve of PIP-*b*-PCL 800:300 equivalents generated by **6** and 0.5 equivalents of [Ph<sub>3</sub>C][B(C<sub>6</sub>F<sub>5</sub>)<sub>4</sub>] from **Table 3**, entry 3.

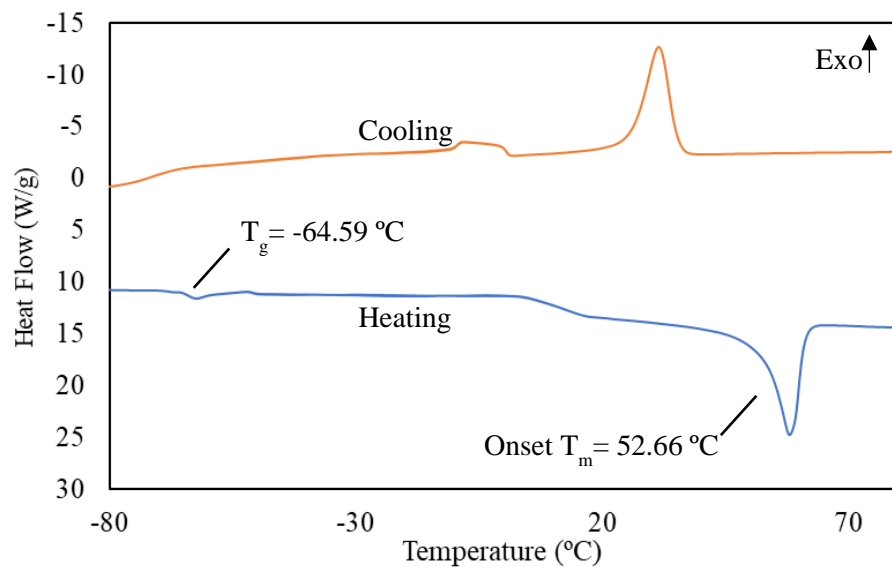

**Fig. S299** DSC curve of PIP-*b*-PCL 800:300 equivalents generated by **6** and 1.5 equivalents of  $[\text{Ph}_3\text{C}][\text{B}(\text{C}_6\text{F}_5)_4]$  from **Table 3**, entry 4.

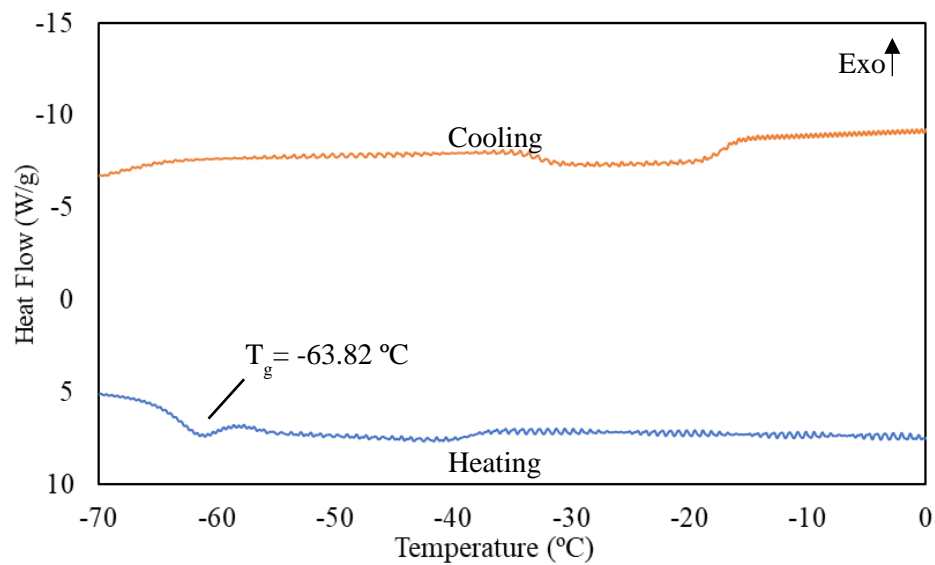

**Fig. S300** DSC curve of PMyr 800 equivalents generated by **6**/  $[\text{Ph}_3\text{C}][\text{B}(\text{C}_6\text{F}_5)_4]$  from **Table 4**, entry 1 (30 min).

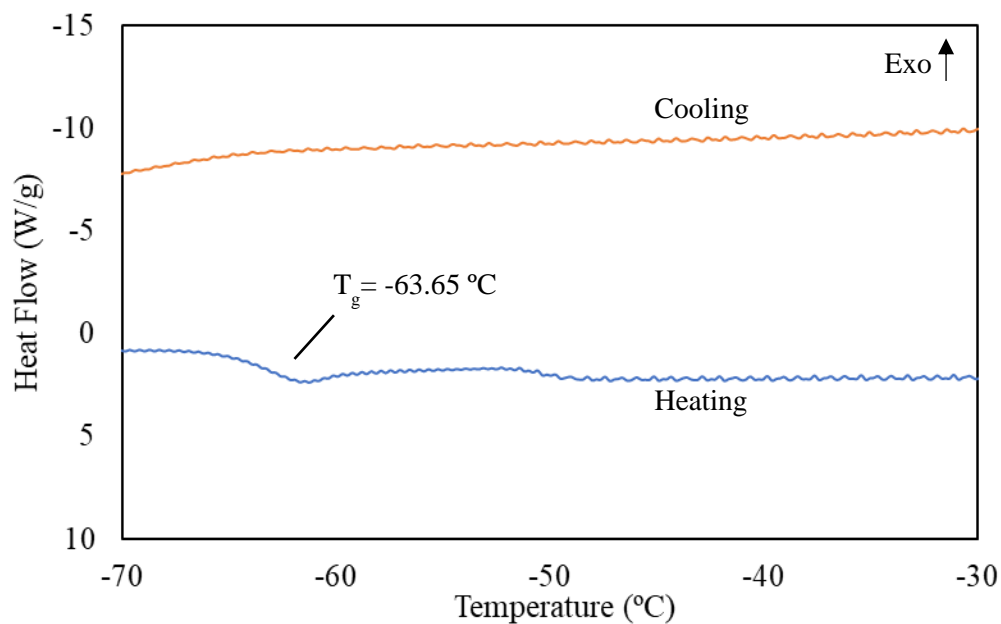

**Fig. S301** DSC curve of PMyr 800 equivalents generated by **6**/[Ph<sub>3</sub>C][B(C<sub>6</sub>F<sub>5</sub>)<sub>4</sub>] from **Table 4**, entry 2 (90 min).

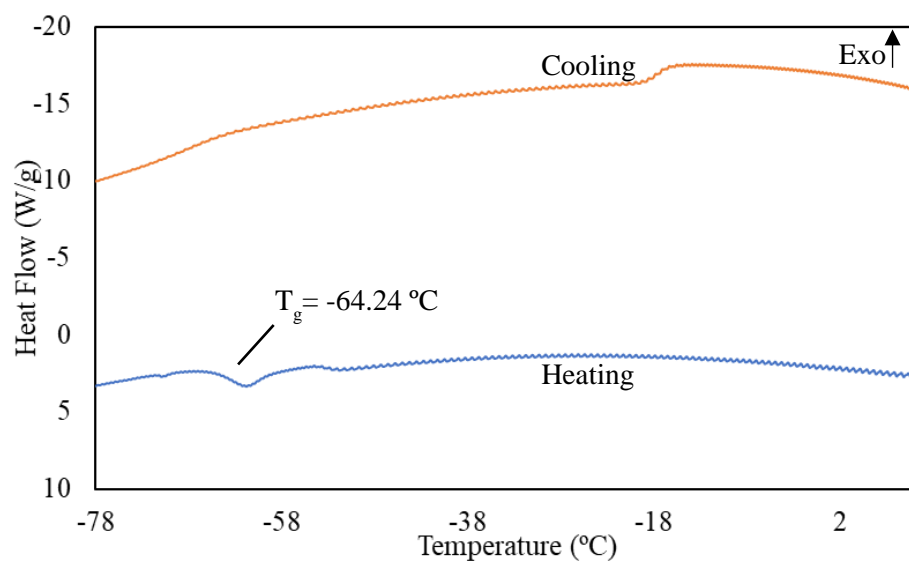

**Fig. S302** DSC curve of PMyr 800 equivalents generated by **6**/[Ph<sub>3</sub>C][B(C<sub>6</sub>F<sub>5</sub>)<sub>4</sub>] from **Table 4**, entry 3 (3 h).

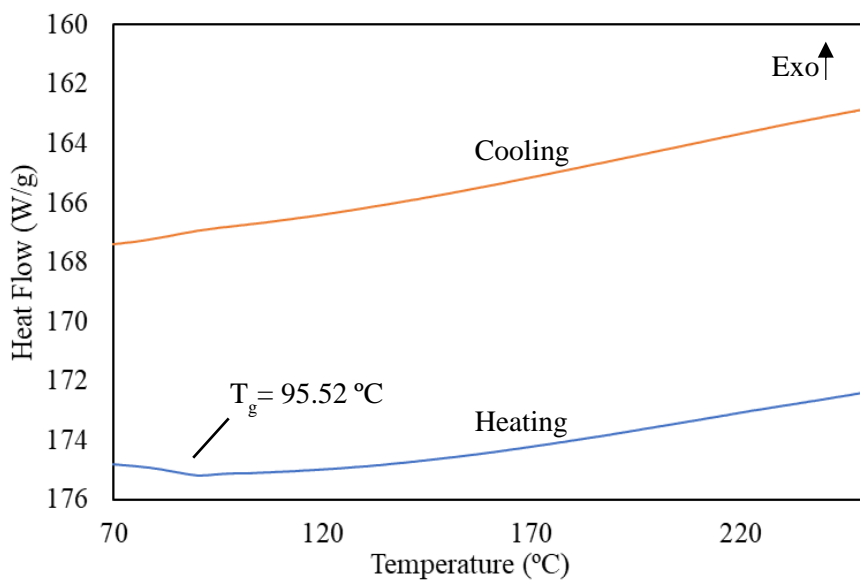

**Fig. S303** DSC curve of PS 800 equivalents generated by **6**/[Ph<sub>3</sub>C][B(C<sub>6</sub>F<sub>5</sub>)<sub>4</sub>] from **Table 4**, entry 4 (30 min).

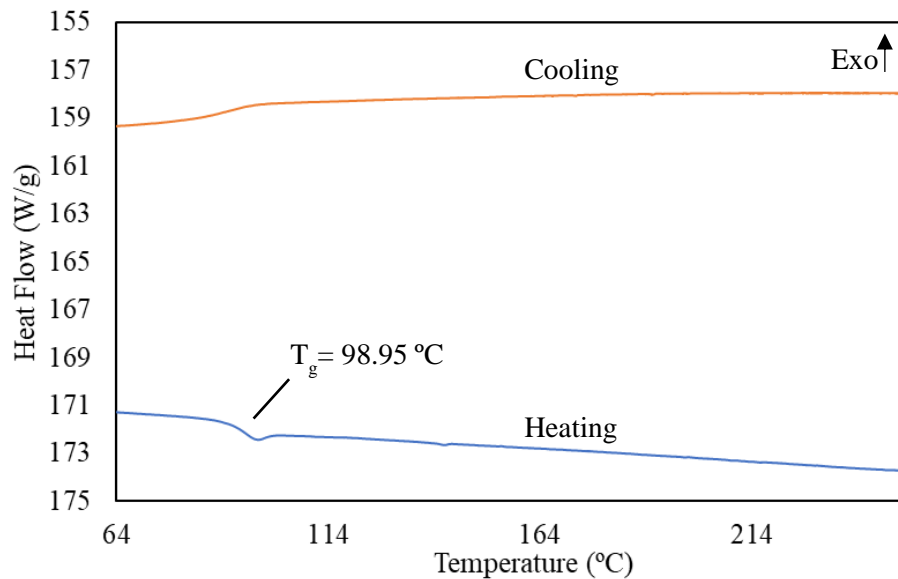

**Fig. S304** DSC curve of PS 800 equivalents generated by **6**/[Ph<sub>3</sub>C][B(C<sub>6</sub>F<sub>5</sub>)<sub>4</sub>] from **Table 4**, entry 5 (20 h).

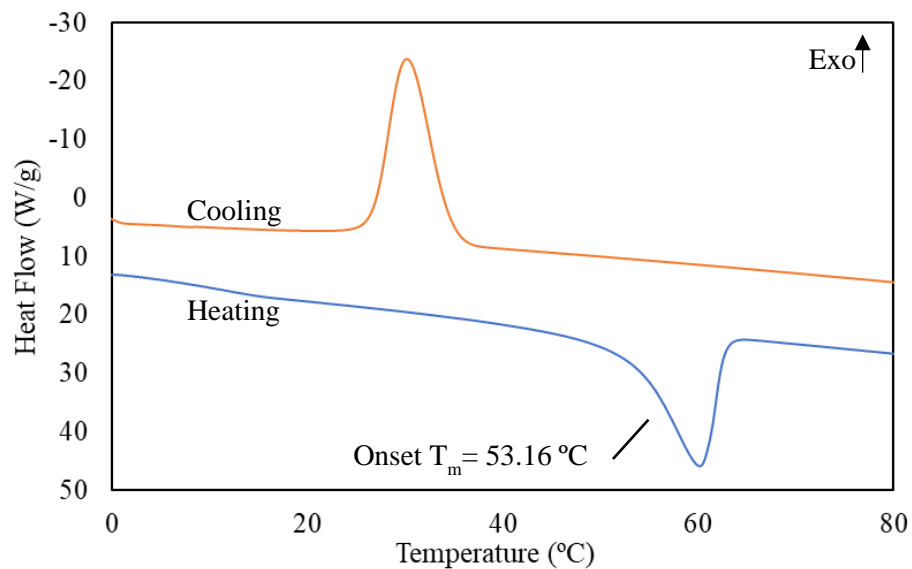

**Fig. S305** DSC curve of PVL 300 equivalents generated by **6**/[Ph<sub>3</sub>C][B(C<sub>6</sub>F<sub>5</sub>)<sub>4</sub>] from **Table 4**, entry 6 (10 min).

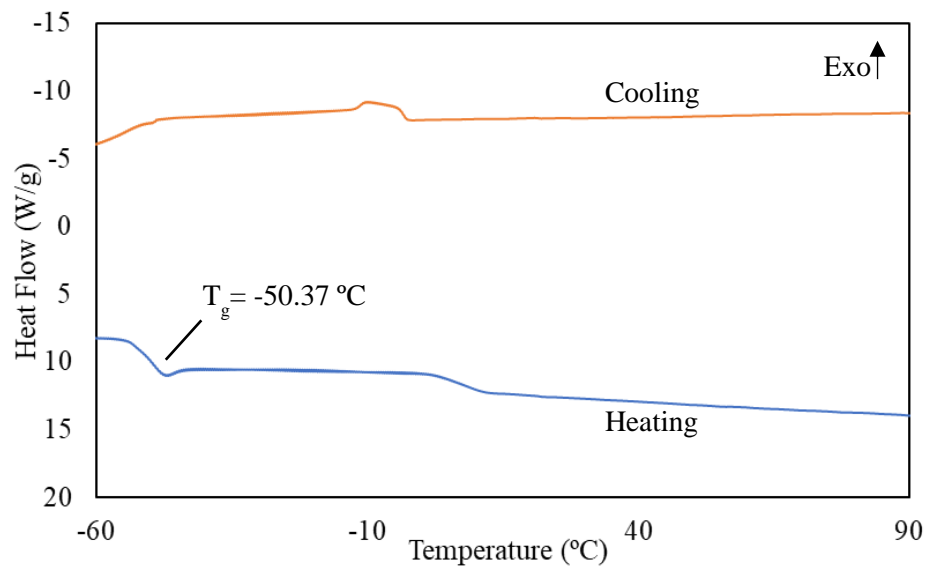

**Fig. S306** DSC curve of PDL 300 equivalents generated by **6**/[Ph<sub>3</sub>C][B(C<sub>6</sub>F<sub>5</sub>)<sub>4</sub>] from **Table 4**, entry 7 (6 h).



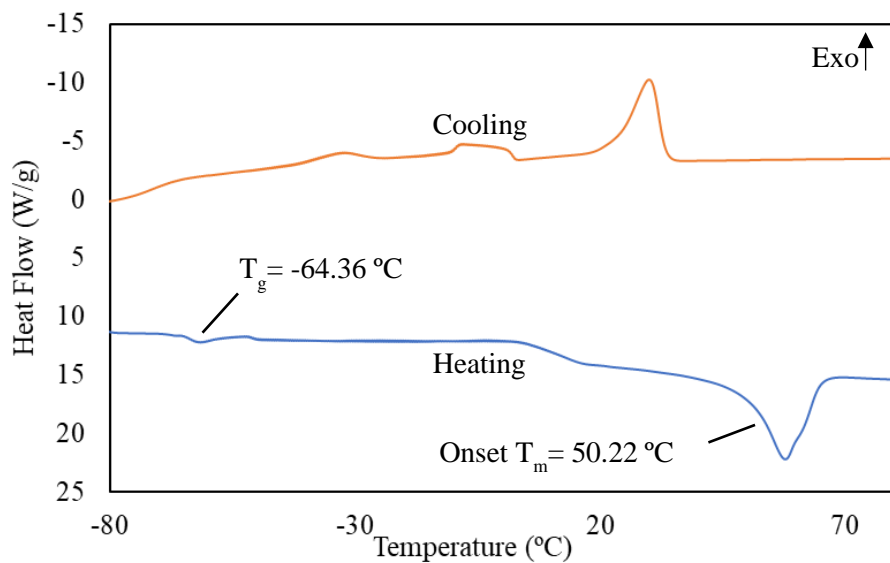

**Fig. S307** DSC curve of PIP-*b*-PVL 800:300 equivalents generated by **6**/[Ph<sub>3</sub>C][B(C<sub>6</sub>F<sub>5</sub>)<sub>4</sub>] from **Table 5**, entry 1.

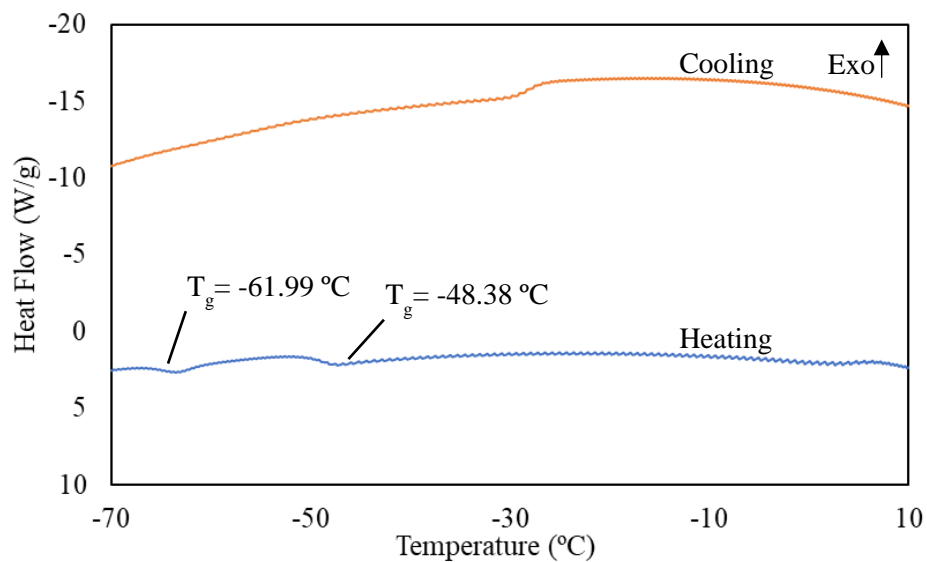

**Fig. S308** DSC curve of PIP-*b*-PDL 800:300 equivalents generated by **6**/[Ph<sub>3</sub>C][B(C<sub>6</sub>F<sub>5</sub>)<sub>4</sub>] from **Table 5**, entry 2.

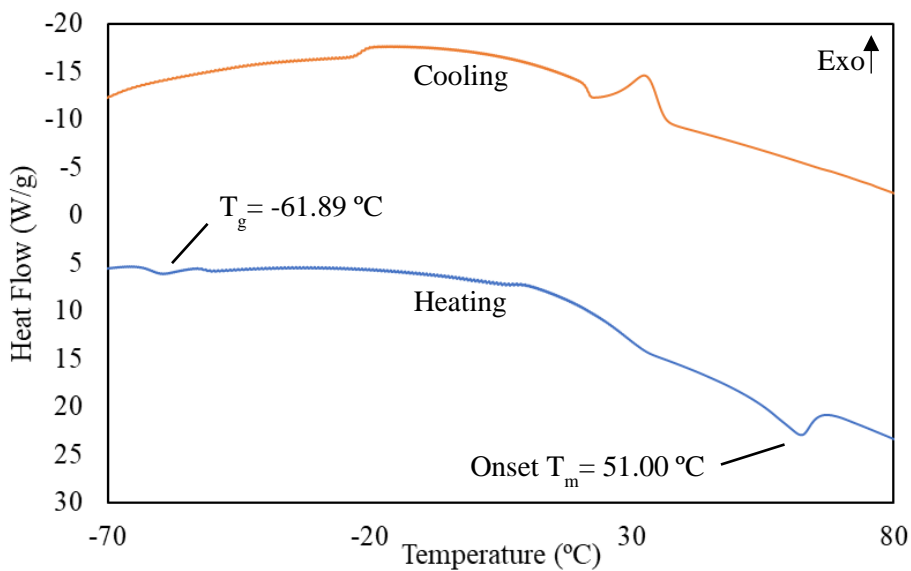

**Fig. S309** DSC curve of PMyr-*b*-PCL 800:300 equivalents generated by **6**/[Ph<sub>3</sub>C][B(C<sub>6</sub>F<sub>5</sub>)<sub>4</sub>] from **Table 5**, entry 3.

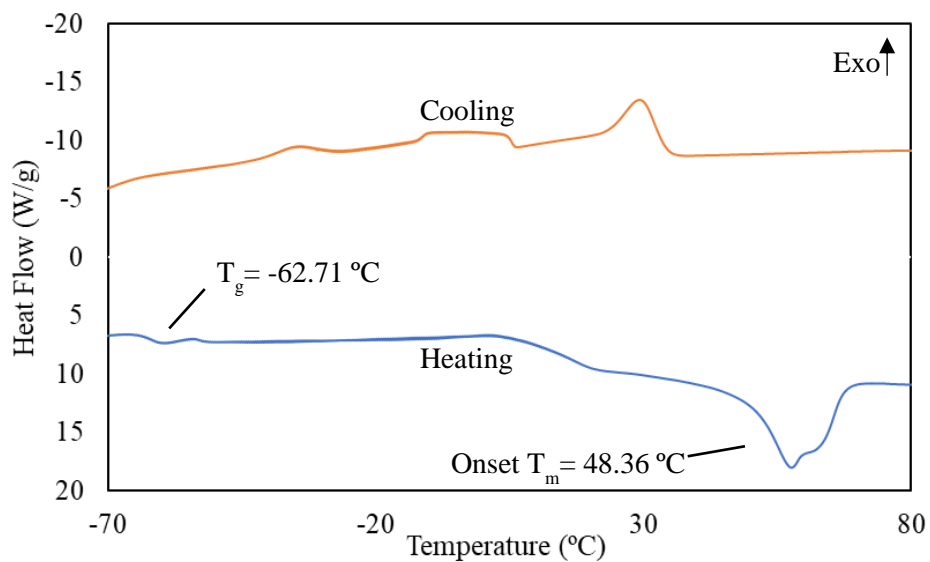

**Fig. S310** DSC curve of PMyr-*b*-PVL 800:300 equivalents generated by **6**/[Ph<sub>3</sub>C][B(C<sub>6</sub>F<sub>5</sub>)<sub>4</sub>] from **Table 5**, entry 4.

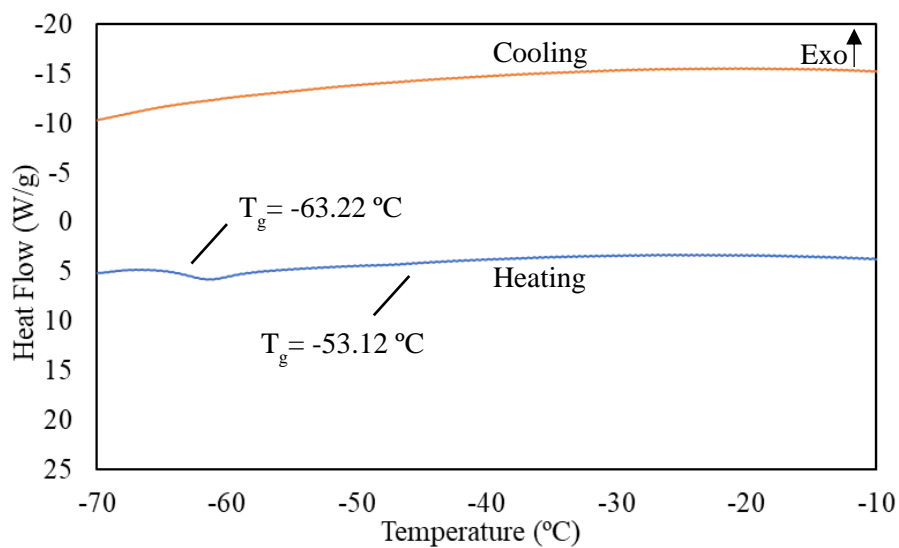

**Fig. S311** DSC curve of PMyr-*b*-PDL 800:300 equivalents generated by **6**/[Ph<sub>3</sub>C][B(C<sub>6</sub>F<sub>5</sub>)<sub>4</sub>] from **Table 5**, entry 5.

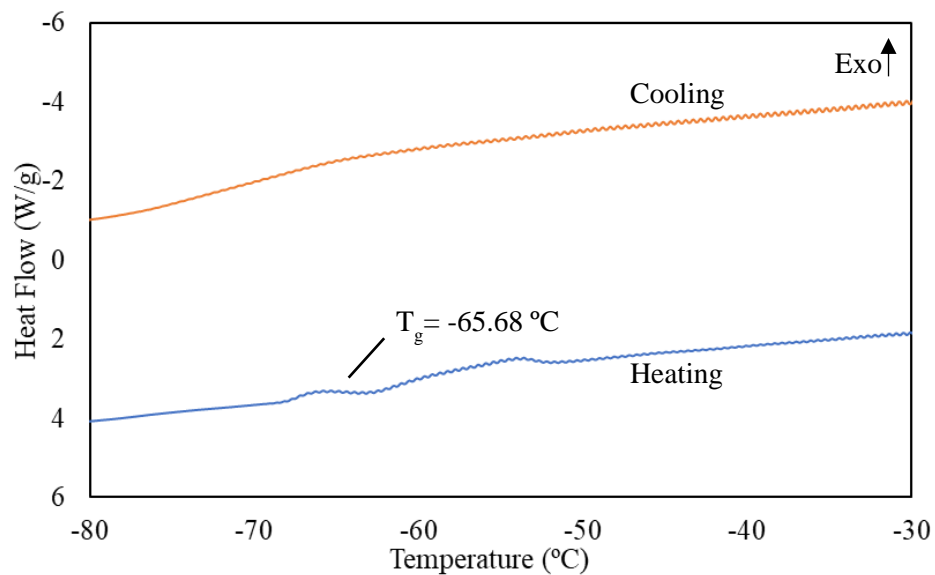

**Fig. S312** DSC curve of PMyr 800 equivalents generated by **8**/[Ph<sub>3</sub>C][B(C<sub>6</sub>F<sub>5</sub>)<sub>4</sub>] from **Table S1**, entry 1 (30 min).

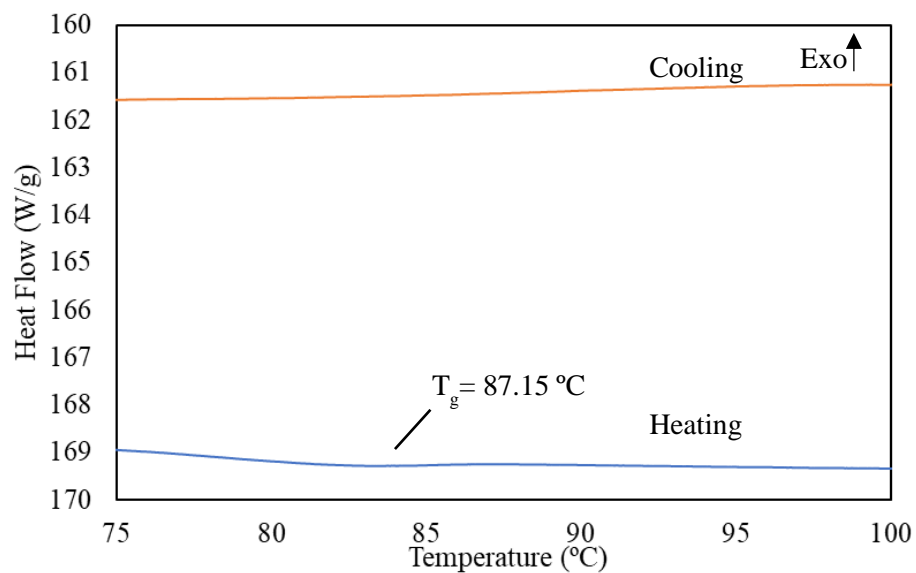

**Fig. S313** DSC curve of PS 800 equivalents generated by **8**/[Ph<sub>3</sub>C][B(C<sub>6</sub>F<sub>5</sub>)<sub>4</sub>] from **Table S1**, entry 2 (30 min).

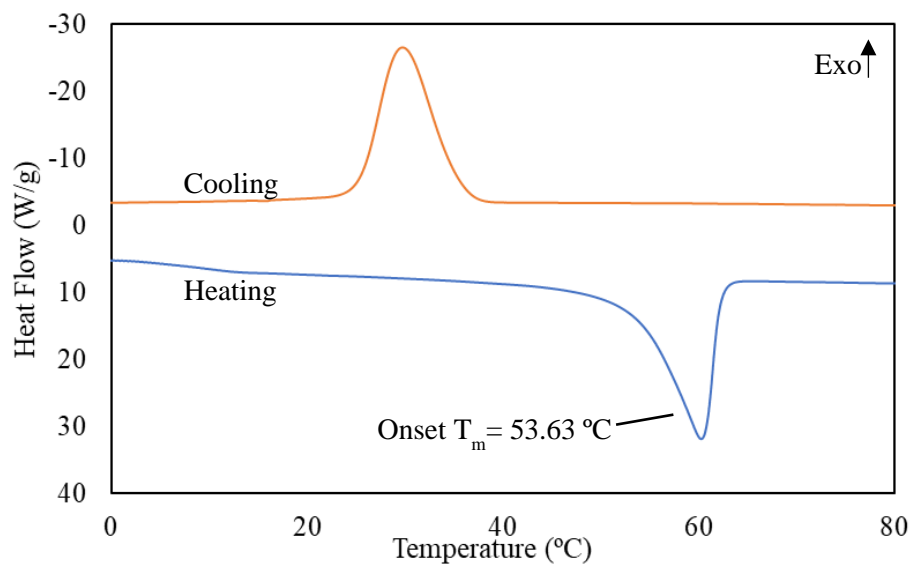

**Fig. S314** DSC curve of PVL 300 equivalents generated by **8**/[Ph<sub>3</sub>C][B(C<sub>6</sub>F<sub>5</sub>)<sub>4</sub>] from **Table S1**, entry 3 (10 min).

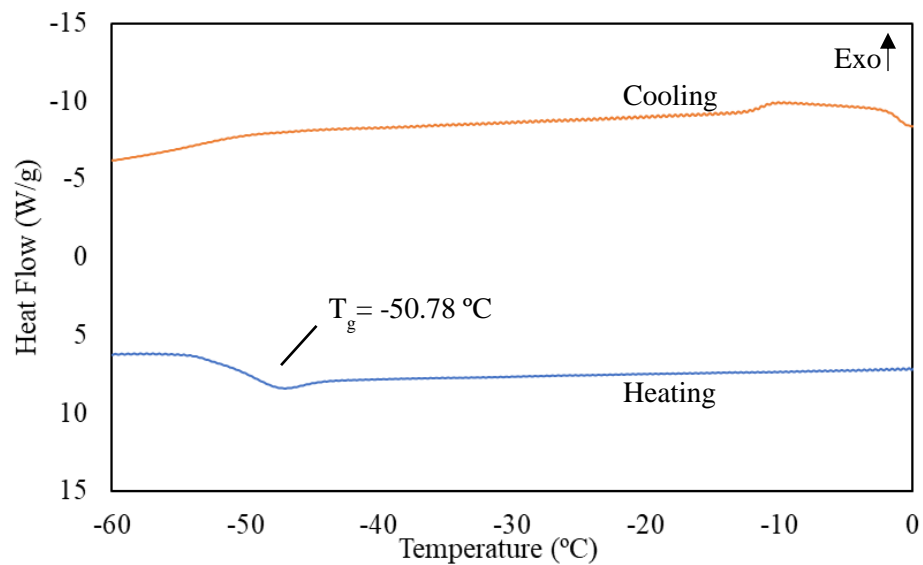

**Fig. S315** DSC curve of PDL 300 equivalents generated by **8**/[Ph<sub>3</sub>C][B(C<sub>6</sub>F<sub>5</sub>)<sub>4</sub>] from **Table S1**, entry 4 (6 h).

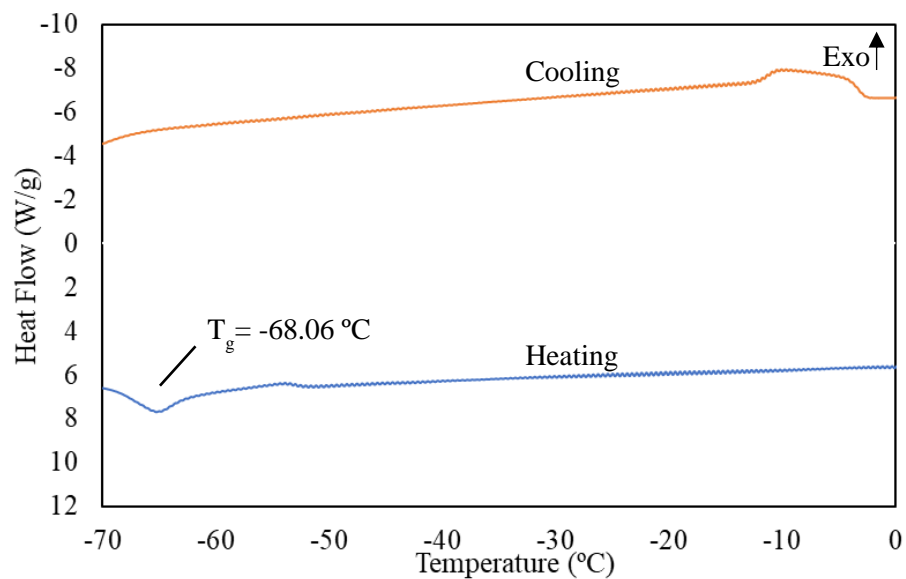

**Fig. S316** DSC curve of PIP 300 equivalents generated by **6**/[Ph<sub>3</sub>C][B(C<sub>6</sub>F<sub>5</sub>)<sub>4</sub>] from **Table S2**, entry 1 (12 h).

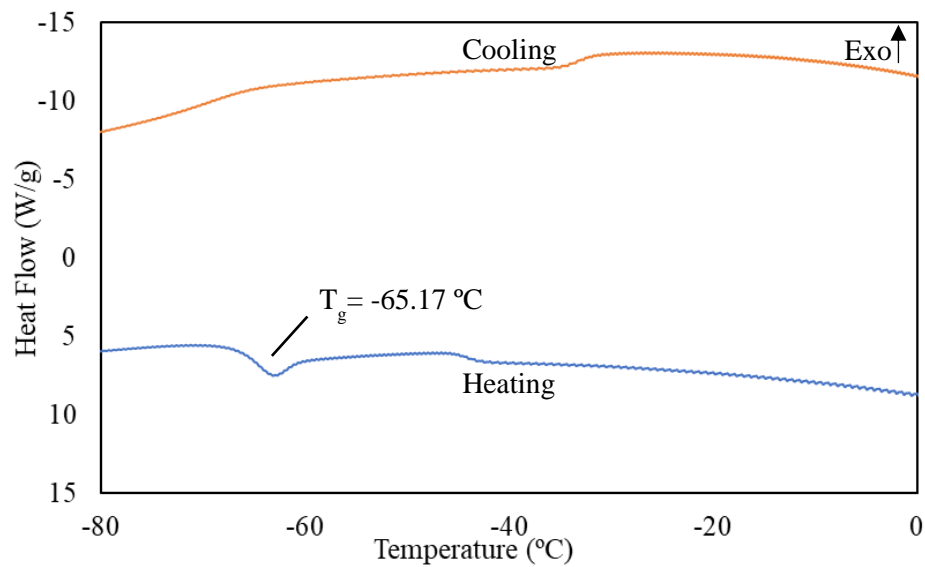

**Fig. S317** DSC curve of PIP 550 equivalents generated by **6**/[Ph<sub>3</sub>C][B(C<sub>6</sub>F<sub>5</sub>)<sub>4</sub>] from **Table S2**, entry 2 (12 h).

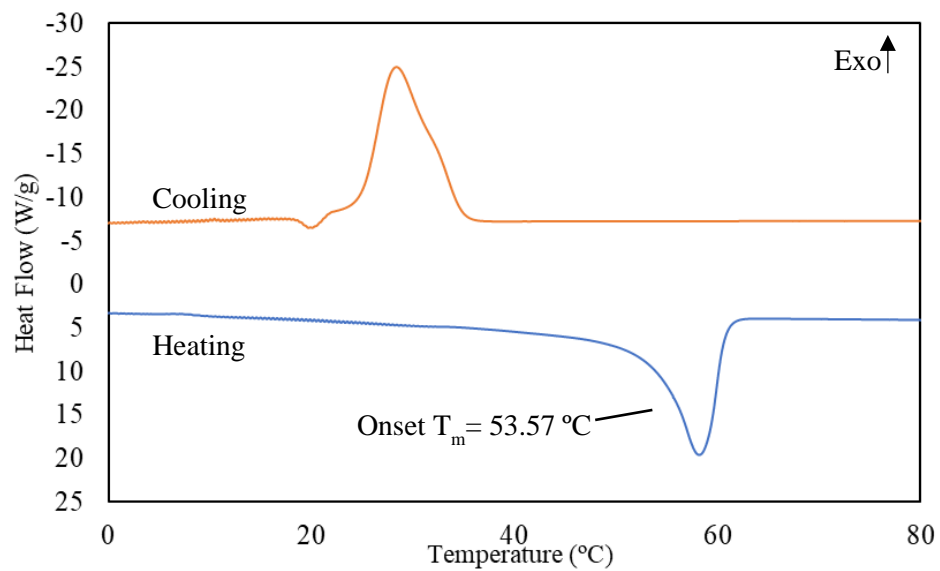

**Fig. S318** DSC curve of PCL 550 equivalents generated by **6**/[Ph<sub>3</sub>C][B(C<sub>6</sub>F<sub>5</sub>)<sub>4</sub>] from **Table S2**, entry 3 (2 h).

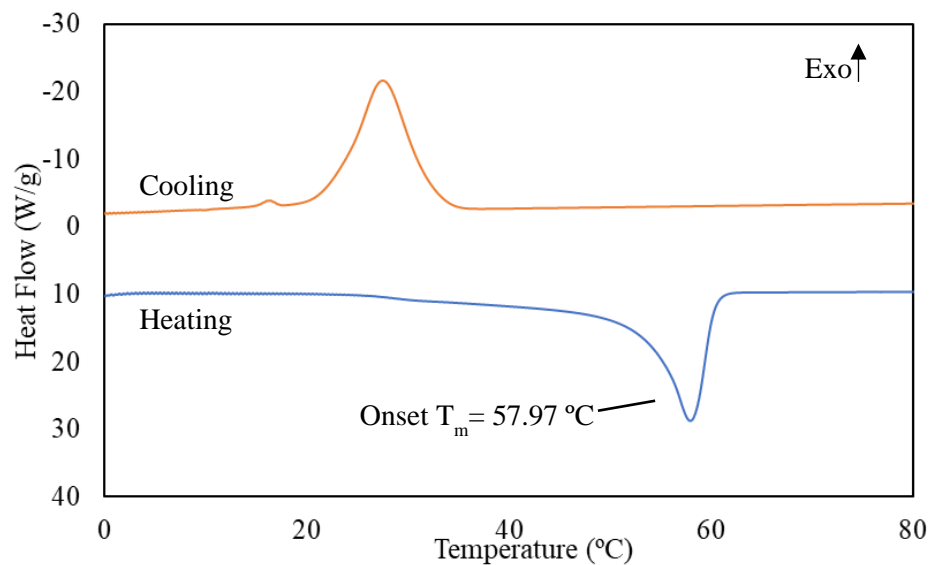

**Fig. S319** DSC curve of PCL 800 equivalents generated by **6**/[Ph<sub>3</sub>C][B(C<sub>6</sub>F<sub>5</sub>)<sub>4</sub>] from **Table S2**, entry 4 (2 h).

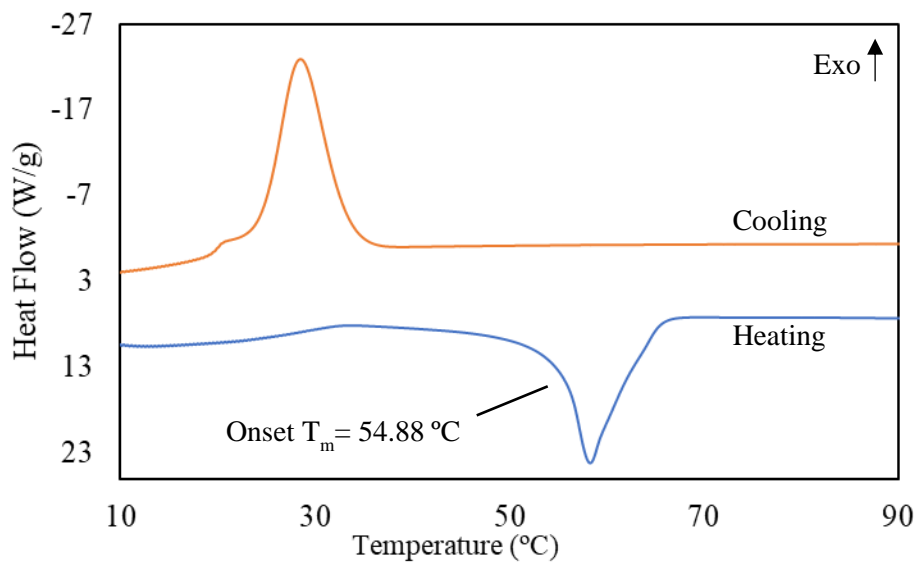

**Fig. S320** DSC curve of PCL 300 equivalents generated by **6** from **Table S2**, entry 5 (No [Ph<sub>3</sub>C][B(C<sub>6</sub>F<sub>5</sub>)<sub>4</sub>] added) (10 min).

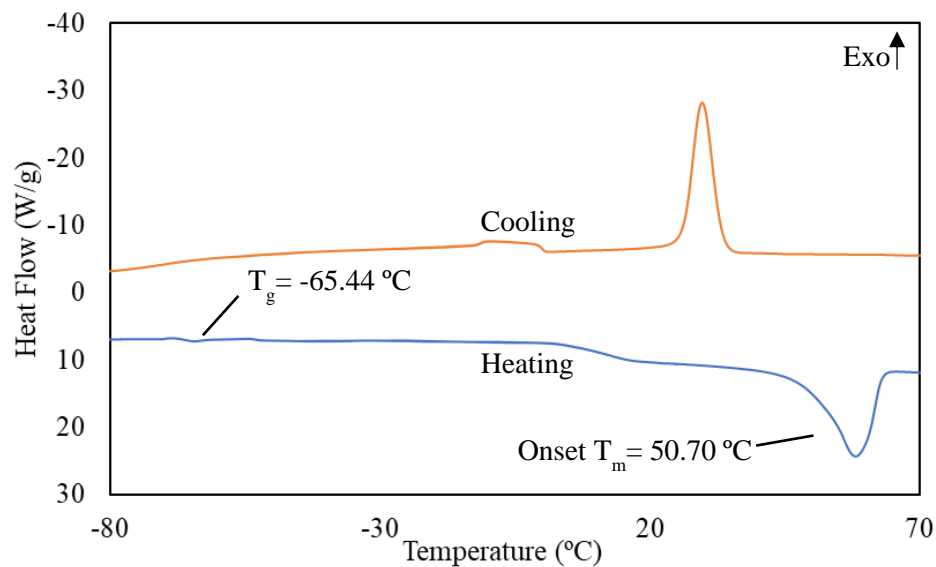

**Fig. S321** DSC curve of PIP-*b*-PCL 50:50 equivalents generated by **6**/[Ph<sub>3</sub>C][B(C<sub>6</sub>F<sub>5</sub>)<sub>4</sub>] from **Table S3**, entry 2.

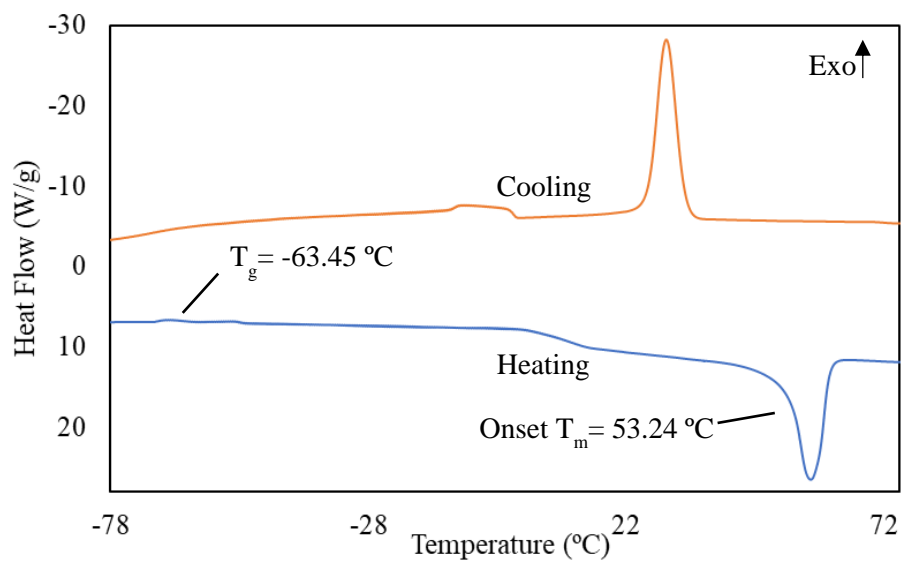

**Fig. S322** DSC curve of PIP-*b*-PCL 50:50 equivalents generated by **Y**[N(SiMe<sub>3</sub>)<sub>2</sub>]<sub>3</sub> from **Table S3**, entry 4 (6 h).
